# Supplementary material for: Integrative Mapping of Regulatory Variation in African American Hepatocytes Using Colocalization and MPRA: Toward Precision Drug Response
Source: Research Square preprint supplement (doi:10.21203/rs.3.rs-9611937/v1), 2026-05-20
Supplement: Supplementary file 1 [file 2dfb98fd7fb8fac70b517f6a.xlsx]

## Sheet: Supplemental Table 1
Supplemental Table 1
Significant cis-eQTLs in African American Hepatocytes (FDR < 0.1)
CHROM	POS	Gene_name	variant_id	A1	A2	pval_nominal	slope	slope_se	af	start_distance	rsID
1	100568439	EXTL2	chr1:100568439:C:T	C	T	3.32443e-06	1.01958	0.198197	0.0753425	-326403	rs1846214
1	107020621	PRMT6	chr1:107020621:G:T	G	T	2.19811e-07	-1.32133	0.224951	0.10274	-36053	rs12406721
1	107023312	PRMT6	chr1:107023312:G:A	G	A	2.19811e-07	-1.32133	0.224951	0.10274	-33362	rs61798463
1	107024067	PRMT6	chr1:107024067:T:A	T	A	2.40652e-06	-1.09167	0.208633	0.130137	-32607	rs56111229
1	107024068	PRMT6	chr1:107024068:C:A	C	A	2.40652e-06	-1.09167	0.208633	0.130137	-32606	rs55924375
1	107026694	PRMT6	chr1:107026694:T:G	T	G	2.19811e-07	-1.32133	0.224951	0.10274	-29980	rs61798468
1	107028139	PRMT6	chr1:107028139:TCTC:T	TCTC	T	2.19811e-07	-1.32133	0.224951	0.10274	-28535	rs72442711
1	107028139	PRMT6	chr1:107028139:TCTC:T	TCTC	T	2.19811e-07	-1.32133	0.224951	0.10274	-28535	rs58267200
1	107036918	PRMT6	chr1:107036918:G:A	G	A	6.1184e-08	-1.36	0.218991	0.10274	-19756	rs12408634
1	107037911	PRMT6	chr1:107037911:C:A	C	A	6.1184e-08	-1.36	0.218991	0.10274	-18763	rs12401598
1	107038417	PRMT6	chr1:107038417:G:A	G	A	3.47059e-07	-1.38599	0.240924	0.0958904	-18257	rs55909997
1	107050337	PRMT6	chr1:107050337:A:G	A	G	3.73945e-10	-1.57528	0.209144	0.0890411	-6337	rs1762509
1	107053498	PRMT6	chr1:107053498:T:C	T	C	6.18744e-12	-1.72603	0.20079	0.0821918	-3176	rs1623927
1	107055366	PRMT6	chr1:107055366:C:T	C	T	6.18744e-12	-1.72603	0.20079	0.0821918	-1308	rs1730850
1	107056636	PRMT6	chr1:107056636:A:T	A	T	6.18744e-12	-1.72603	0.20079	0.0821918	-38	rs2232015
1	107062989	PRMT6	chr1:107062989:G:T	G	T	6.18744e-12	-1.72603	0.20079	0.0821918	6315	rs1730865
1	107064413	PRMT6	chr1:107064413:T:TCAG	T	TCAG	6.18744e-12	-1.72603	0.20079	0.0821918	7739	rs3032555
1	107064415	PRMT6	chr1:107064415:T:G	T	G	6.18744e-12	-1.72603	0.20079	0.0821918	7741	rs1977658
1	107065188	PRMT6	chr1:107065188:C:T	C	T	6.18744e-12	-1.72603	0.20079	0.0821918	8514	rs1730864
1	107071301	PRMT6	chr1:107071301:A:C	A	C	6.18744e-12	-1.72603	0.20079	0.0821918	14627	rs1762484
1	107071381	PRMT6	chr1:107071381:G:A	G	A	8.39569e-11	-1.62124	0.204746	0.0890411	14707	rs1730862
1	107075085	PRMT6	chr1:107075085:G:A	G	A	6.18744e-12	-1.72603	0.20079	0.0821918	18411	rs1730859
1	107076622	PRMT6	chr1:107076622:T:C	T	C	6.18744e-12	-1.72603	0.20079	0.0821918	19948	rs1730858
1	107080201	PRMT6	chr1:107080201:C:T	C	T	6.18744e-12	-1.72603	0.20079	0.0821918	23527	rs1335053
1	107080301	PRMT6	chr1:107080301:AT:A	AT	A	6.18744e-12	-1.72603	0.20079	0.0821918	23627	rs59591412
1	107080301	PRMT6	chr1:107080301:AT:A	AT	A	6.18744e-12	-1.72603	0.20079	0.0821918	23627	rs796838467
1	107082434	PRMT6	chr1:107082434:C:T	C	T	6.18744e-12	-1.72603	0.20079	0.0821918	25760	rs1762485
1	107085075	PRMT6	chr1:107085075:G:A	G	A	6.18744e-12	-1.72603	0.20079	0.0821918	28401	rs1762486
1	108194680	SLC25A24	chr1:108194680:C:G	C	G	4.13769e-07	-0.508105	0.0890463	0.273973	-5663	rs607101
1	108194803	SLC25A24	chr1:108194803:T:C	T	C	4.13769e-07	-0.508105	0.0890463	0.273973	-5540	rs606640
1	108194929	SLC25A24	chr1:108194929:T:C	T	C	4.13769e-07	-0.508105	0.0890463	0.273973	-5414	rs606166
1	108195184	SLC25A24	chr1:108195184:T:TCTAAA	T	TCTAAA	4.13769e-07	-0.508105	0.0890463	0.273973	-5159	rs112727363
1	108195738	SLC25A24	chr1:108195738:C:A	C	A	4.13769e-07	-0.508105	0.0890463	0.273973	-4605	rs505024
1	108195814	SLC25A24	chr1:108195814:A:C	A	C	4.13769e-07	-0.508105	0.0890463	0.273973	-4529	rs591763
1	108196413	SLC25A24	chr1:108196413:A:G	A	G	4.13769e-07	-0.508105	0.0890463	0.273973	-3930	rs589073
1	108196482	SLC25A24	chr1:108196482:A:G	A	G	4.13769e-07	-0.508105	0.0890463	0.273973	-3861	rs533233
1	108196549	SLC25A24	chr1:108196549:A:G	A	G	4.13769e-07	-0.508105	0.0890463	0.273973	-3794	rs685847
1	108196592	SLC25A24	chr1:108196592:T:C	T	C	4.13769e-07	-0.508105	0.0890463	0.273973	-3751	rs828992
1	108196606	SLC25A24	chr1:108196606:A:C	A	C	4.13769e-07	-0.508105	0.0890463	0.273973	-3737	rs828993
1	108196812	SLC25A24	chr1:108196812:AAAG:A	AAAG	A	4.13769e-07	-0.508105	0.0890463	0.273973	-3531	rs151051897
1	108196812	SLC25A24	chr1:108196812:AAAG:A	AAAG	A	4.13769e-07	-0.508105	0.0890463	0.273973	-3531	rs34292729
1	108197083	SLC25A24	chr1:108197083:C:T	C	T	4.13769e-07	-0.508105	0.0890463	0.273973	-3260	rs538717
1	108197104	SLC25A24	chr1:108197104:G:GA	G	GA	4.13769e-07	-0.508105	0.0890463	0.273973	-3239	rs34148137
1	108197227	SLC25A24	chr1:108197227:C:T	C	T	2.84172e-06	-0.52516	0.101242	0.239726	-3116	rs676166
1	108197797	SLC25A24	chr1:108197797:C:T	C	T	2.84172e-06	-0.52516	0.101242	0.239726	-2546	rs828994
1	108198443	SLC25A24	chr1:108198443:T:C	T	C	4.13769e-07	-0.508105	0.0890463	0.273973	-1900	rs594397
1	108200270	SLC25A24	chr1:108200270:T:G	T	G	4.13769e-07	-0.508105	0.0890463	0.273973	-73	rs554709
1	108200282	SLC25A24	chr1:108200282:CGCGCAGG:C	CGCGCAGG	C	4.13769e-07	-0.508105	0.0890463	0.273973	-61	rs150513527
1	108200332	SLC25A24	chr1:108200332:A:C	A	C	4.13769e-07	-0.508105	0.0890463	0.273973	-11	rs662282
1	108200420	SLC25A24	chr1:108200420:C:A	C	A	4.13769e-07	-0.508105	0.0890463	0.273973	77	rs576805
1	108200518	SLC25A24	chr1:108200518:C:G	C	G	4.13769e-07	-0.508105	0.0890463	0.273973	175	rs577690
1	108200556	SLC25A24	chr1:108200556:C:G	C	G	4.13769e-07	-0.508105	0.0890463	0.273973	213	rs663481
1	109272630	PSRC1	chr1:109272630:A:G	A	G	8.47698e-07	0.691352	0.125371	0.349315	-10515	rs611917
1	109274570	CELSR2	chr1:109274570:A:G	A	G	1.06374e-05	0.775722	0.160851	0.273973	25031	rs7528419
1	109274570	PSRC1	chr1:109274570:A:G	A	G	5.06829e-08	0.823932	0.131628	0.273973	-8575	rs7528419
1	109274570	SORT1	chr1:109274570:A:G	A	G	4.29648e-10	0.885085	0.118072	0.273973	-123348	rs7528419
1	109274968	SORT1	chr1:109274968:G:T	G	T	4.29648e-10	0.885085	0.118072	0.273973	-122950	rs12740374
1	109274968	CELSR2	chr1:109274968:G:T	G	T	1.06374e-05	0.775722	0.160851	0.273973	25429	rs12740374
1	109274968	PSRC1	chr1:109274968:G:T	G	T	5.06829e-08	0.823932	0.131628	0.273973	-8177	rs12740374
1	109275216	PSRC1	chr1:109275216:T:C	T	C	1.7351e-07	0.706794	0.119062	0.321918	-7929	rs660240
1	109275216	SORT1	chr1:109275216:T:C	T	C	2.0756e-07	0.683831	0.116119	0.321918	-122702	rs660240
1	109275216	CELSR2	chr1:109275216:T:C	T	C	1.9283e-05	0.670004	0.143926	0.321918	25677	rs660240
1	109275536	SORT1	chr1:109275536:C:CT	C	CT	3.70324e-07	0.667945	0.116456	0.369863	-122382	rs57677983
1	109275536	SORT1	chr1:109275536:C:CT	C	CT	3.70324e-07	0.667945	0.116456	0.369863	-122382	rs3832016
1	109275536	PSRC1	chr1:109275536:C:CT	C	CT	1.01791e-06	0.665742	0.121813	0.369863	-7609	rs57677983
1	109275536	PSRC1	chr1:109275536:C:CT	C	CT	1.01791e-06	0.665742	0.121813	0.369863	-7609	rs3832016
1	109275536	CELSR2	chr1:109275536:C:CT	C	CT	9.0448e-06	0.687175	0.141165	0.369863	25997	rs57677983
1	109275536	CELSR2	chr1:109275536:C:CT	C	CT	9.0448e-06	0.687175	0.141165	0.369863	25997	rs3832016
1	109275684	CELSR2	chr1:109275684:G:T	G	T	5.36754e-07	0.796442	0.141295	0.342466	26145	rs629301
1	109275684	SORT1	chr1:109275684:G:T	G	T	9.15925e-07	0.68153	0.124058	0.342466	-122234	rs629301
1	109275684	PSRC1	chr1:109275684:G:T	G	T	4.31241e-07	0.717494	0.125985	0.342466	-7461	rs629301
1	109275908	SORT1	chr1:109275908:C:T	C	T	9.15925e-07	0.68153	0.124058	0.342466	-122010	rs646776
1	109275908	CELSR2	chr1:109275908:C:T	C	T	5.36754e-07	0.796442	0.141295	0.342466	26369	rs646776
1	109275908	PSRC1	chr1:109275908:C:T	C	T	4.31241e-07	0.717494	0.125985	0.342466	-7237	rs646776
1	109299649	SYPL2	chr1:109299649:C:T	C	T	1.34558e-05	-0.607702	0.127756	0.445205	-166897	rs680434
1	109301910	SYPL2	chr1:109301910:A:G	A	G	1.19596e-05	-0.617613	0.128943	0.438356	-164636	rs652651
1	109303656	SYPL2	chr1:109303656:C:T	C	T	9.84502e-06	0.658951	0.136028	0.369863	-162890	rs407102
1	109306104	SYPL2	chr1:109306104:A:T	A	T	2.09372e-06	0.689972	0.130916	0.369863	-160442	rs592107
1	109306522	SYPL2	chr1:109306522:T:C	T	C	7.37624e-06	-0.638138	0.129581	0.410959	-160024	rs417270
1	109306632	SYPL2	chr1:109306632:A:G	A	G	7.37624e-06	-0.638138	0.129581	0.410959	-159914	rs443345
1	109307500	SYPL2	chr1:109307500:C:A	C	A	7.37624e-06	-0.638138	0.129581	0.410959	-159046	rs367586
1	109308505	SYPL2	chr1:109308505:A:G	A	G	9.30961e-07	-0.682721	0.124374	0.431507	-158041	rs444387
1	109312782	SYPL2	chr1:109312782:G:A	G	A	2.98831e-06	0.670065	0.129521	0.376712	-153764	rs461200
1	109313762	SYPL2	chr1:109313762:CAA:C	CAA	C	2.98831e-06	0.670065	0.129521	0.376712	-152784	rs398053335
1	109313762	SYPL2	chr1:109313762:CAA:C	CAA	C	2.98831e-06	0.670065	0.129521	0.376712	-152784	rs68028414
1	109313762	SYPL2	chr1:109313762:CAA:C	CAA	C	2.98831e-06	0.670065	0.129521	0.376712	-152784	rs869119407
1	109315497	SYPL2	chr1:109315497:T:C	T	C	2.98831e-06	0.670065	0.129521	0.376712	-151049	rs370088
1	109317522	SYPL2	chr1:109317522:T:C	T	C	7.4553e-06	-0.614972	0.124952	0.410959	-149024	rs3853498
1	109321647	SYPL2	chr1:109321647:T:C	T	C	7.4553e-06	-0.614972	0.124952	0.410959	-144899	rs3853500
1	109321752	SYPL2	chr1:109321752:G:A	G	A	7.4553e-06	-0.614972	0.124952	0.410959	-144794	rs3853501
1	109322660	SYPL2	chr1:109322660:CT:C	CT	C	2.98831e-06	0.670065	0.129521	0.376712	-143886	rs397800971
1	109322660	SYPL2	chr1:109322660:CT:C	CT	C	2.98831e-06	0.670065	0.129521	0.376712	-143886	rs11330939
1	109323608	SYPL2	chr1:109323608:T:C	T	C	2.98831e-06	0.670065	0.129521	0.376712	-142938	rs3768497
1	109323947	SYPL2	chr1:109323947:T:A	T	A	2.98831e-06	0.670065	0.129521	0.376712	-142599	rs3768496
1	109324135	SYPL2	chr1:109324135:CT:C	CT	C	2.98831e-06	0.670065	0.129521	0.376712	-142411	rs796857427
1	109324135	SYPL2	chr1:109324135:CT:C	CT	C	2.98831e-06	0.670065	0.129521	0.376712	-142411	rs35914471
1	109324222	SYPL2	chr1:109324222:G:A	G	A	7.4553e-06	-0.614972	0.124952	0.410959	-142324	rs12136140
1	109325270	SYPL2	chr1:109325270:A:G	A	G	2.98831e-06	0.670065	0.129521	0.376712	-141276	rs12045346
1	109325307	SYPL2	chr1:109325307:G:A	G	A	7.4553e-06	-0.614972	0.124952	0.410959	-141239	rs11102969
1	109328237	SYPL2	chr1:109328237:C:G	C	G	7.4553e-06	-0.614972	0.124952	0.410959	-138309	rs6695482
1	109329165	SYPL2	chr1:109329165:T:C	T	C	7.4553e-06	-0.614972	0.124952	0.410959	-137381	rs10745352
1	109329748	SYPL2	chr1:109329748:C:T	C	T	7.4553e-06	-0.614972	0.124952	0.410959	-136798	rs11102971
1	109330745	SYPL2	chr1:109330745:A:G	A	G	2.98831e-06	0.670065	0.129521	0.376712	-135801	rs4970840
1	109330951	SYPL2	chr1:109330951:G:A	G	A	7.4553e-06	-0.614972	0.124952	0.410959	-135595	rs4970749
1	109332793	SYPL2	chr1:109332793:C:T	C	T	2.98831e-06	0.670065	0.129521	0.376712	-133753	rs12046539
1	109336927	SYPL2	chr1:109336927:C:T	C	T	7.4553e-06	-0.614972	0.124952	0.410959	-129619	rs4603158
1	109337270	SYPL2	chr1:109337270:G:C	G	C	8.98986e-07	-0.661793	0.120355	0.431507	-129276	rs4970841
1	109337327	SYPL2	chr1:109337327:A:G	A	G	7.4553e-06	-0.614972	0.124952	0.410959	-129219	rs4970842
1	109339628	SYPL2	chr1:109339628:T:A	T	A	7.4553e-06	-0.614972	0.124952	0.410959	-126918	rs10858084
1	109342153	SYPL2	chr1:109342153:T:G	T	G	7.4553e-06	-0.614972	0.124952	0.410959	-124393	rs2228604
1	109343688	SYPL2	chr1:109343688:T:G	T	G	2.98831e-06	0.670065	0.129521	0.376712	-122858	rs11102973
1	109343749	SYPL2	chr1:109343749:G:A	G	A	2.98831e-06	0.670065	0.129521	0.376712	-122797	rs11102974
1	109343773	SYPL2	chr1:109343773:C:T	C	T	7.4553e-06	-0.614972	0.124952	0.410959	-122773	rs7520048
1	109348511	SYPL2	chr1:109348511:C:T	C	T	4.35111e-06	-0.62734	0.123725	0.40411	-118035	rs10127790
1	109348781	SYPL2	chr1:109348781:C:T	C	T	7.4553e-06	-0.614972	0.124952	0.410959	-117765	rs3879447
1	109348801	SYPL2	chr1:109348801:G:C	G	C	7.4553e-06	-0.614972	0.124952	0.410959	-117745	rs3879448
1	109353978	SYPL2	chr1:109353978:A:C	A	C	7.4553e-06	-0.614972	0.124952	0.410959	-112568	rs4970751
1	109358085	SYPL2	chr1:109358085:C:G	C	G	9.7135e-06	-0.597755	0.123299	0.40411	-108461	rs1030522
1	109358593	SYPL2	chr1:109358593:T:C	T	C	2.98831e-06	0.670065	0.129521	0.376712	-107953	rs1963870
1	109358840	SYPL2	chr1:109358840:G:C	G	C	7.4553e-06	-0.614972	0.124952	0.410959	-107706	rs1963869
1	109362349	SYPL2	chr1:109362349:A:T	A	T	7.4553e-06	-0.614972	0.124952	0.410959	-104197	rs3879449
1	109366527	SYPL2	chr1:109366527:C:T	C	T	7.4553e-06	-0.614972	0.124952	0.410959	-100019	rs3879450
1	109366647	SYPL2	chr1:109366647:C:T	C	T	7.4553e-06	-0.614972	0.124952	0.410959	-99899	rs3879451
1	109369074	SYPL2	chr1:109369074:CT:C	CT	C	2.98831e-06	0.670065	0.129521	0.376712	-97472	rs3835720
1	109369074	SYPL2	chr1:109369074:CT:C	CT	C	2.98831e-06	0.670065	0.129521	0.376712	-97472	rs34906542
1	109372361	SYPL2	chr1:109372361:A:G	A	G	2.98831e-06	0.670065	0.129521	0.376712	-94185	rs10858085
1	109372453	SYPL2	chr1:109372453:C:A	C	A	2.98831e-06	0.670065	0.129521	0.376712	-94093	rs10858086
1	109374268	SYPL2	chr1:109374268:T:A	T	A	7.4553e-06	-0.614972	0.124952	0.410959	-92278	rs10858087
1	109374918	SYPL2	chr1:109374918:G:C	G	C	2.98831e-06	0.670065	0.129521	0.376712	-91628	rs11102976
1	109376144	SYPL2	chr1:109376144:T:C	T	C	2.98831e-06	0.670065	0.129521	0.376712	-90402	rs12037677
1	109380964	SYPL2	chr1:109380964:C:T	C	T	7.276e-06	-0.613249	0.124431	0.417808	-85582	rs10858088
1	109384206	SYPL2	chr1:109384206:T:C	T	C	7.276e-06	-0.613249	0.124431	0.417808	-82340	rs10858089
1	109386615	SYPL2	chr1:109386615:G:A	G	A	7.276e-06	-0.613249	0.124431	0.417808	-79931	rs3879452
1	109388230	SYPL2	chr1:109388230:C:T	C	T	4.29659e-06	-0.625028	0.123185	0.410959	-78316	rs4970752
1	109389286	SYPL2	chr1:109389286:C:T	C	T	7.276e-06	-0.613249	0.124431	0.417808	-77260	rs10745354
1	109392703	SYPL2	chr1:109392703:C:T	C	T	7.276e-06	-0.613249	0.124431	0.417808	-73843	rs3768495
1	109392805	SYPL2	chr1:109392805:A:G	A	G	2.98831e-06	0.670065	0.129521	0.376712	-73741	rs3768494
1	109392883	SYPL2	chr1:109392883:C:T	C	T	7.276e-06	-0.613249	0.124431	0.417808	-73663	rs3768493
1	109392956	SYPL2	chr1:109392956:T:C	T	C	7.276e-06	-0.613249	0.124431	0.417808	-73590	rs10858091
1	109393153	SYPL2	chr1:109393153:A:C	A	C	2.98831e-06	0.670065	0.129521	0.376712	-73393	rs2140924
1	109394060	SYPL2	chr1:109394060:G:A	G	A	2.98831e-06	0.670065	0.129521	0.376712	-72486	rs6537757
1	109394804	SYPL2	chr1:109394804:T:C	T	C	7.276e-06	-0.613249	0.124431	0.417808	-71742	rs1343465
1	109395294	SYPL2	chr1:109395294:C:T	C	T	2.98831e-06	0.670065	0.129521	0.376712	-71252	rs12711447
1	109395309	SYPL2	chr1:109395309:C:T	C	T	7.276e-06	-0.613249	0.124431	0.417808	-71237	rs12711448
1	109398511	SYPL2	chr1:109398511:C:T	C	T	7.276e-06	-0.613249	0.124431	0.417808	-68035	rs1880670
1	109401271	SYPL2	chr1:109401271:C:T	C	T	7.276e-06	-0.613249	0.124431	0.417808	-65275	rs10858092
1	109401456	SYPL2	chr1:109401456:T:C	T	C	2.98831e-06	0.670065	0.129521	0.376712	-65090	rs7518013
1	109403473	SYPL2	chr1:109403473:A:C	A	C	2.98831e-06	0.670065	0.129521	0.376712	-63073	rs4970846
1	109404260	SYPL2	chr1:109404260:T:C	T	C	2.98831e-06	0.670065	0.129521	0.376712	-62286	rs2152925
1	109406386	SYPL2	chr1:109406386:A:G	A	G	2.98831e-06	0.670065	0.129521	0.376712	-60160	rs4120621
1	109408236	SYPL2	chr1:109408236:T:C	T	C	1.17628e-06	-0.66207	0.12201	0.424658	-58310	rs10858094
1	109409089	SYPL2	chr1:109409089:T:C	T	C	2.98831e-06	0.670065	0.129521	0.376712	-57457	rs10745355
1	109409505	SYPL2	chr1:109409505:G:A	G	A	2.98831e-06	0.670065	0.129521	0.376712	-57041	rs10776806
1	109415413	SYPL2	chr1:109415413:T:C	T	C	2.98831e-06	0.670065	0.129521	0.376712	-51133	rs1465607
1	109417648	SYPL2	chr1:109417648:C:A	C	A	2.98831e-06	0.670065	0.129521	0.376712	-48898	rs10745356
1	109419343	SYPL2	chr1:109419343:C:T	C	T	2.98831e-06	0.670065	0.129521	0.376712	-47203	rs7551176
1	109420020	SYPL2	chr1:109420020:G:C	G	C	1.52367e-06	-0.656921	0.12264	0.431507	-46526	rs10858095
1	109422634	SYPL2	chr1:109422634:G:A	G	A	2.98831e-06	0.670065	0.129521	0.376712	-43912	rs12024582
1	109423364	SYPL2	chr1:109423364:A:G	A	G	1.07604e-05	-0.614848	0.127578	0.410959	-43182	rs3768491
1	109424096	SYPL2	chr1:109424096:A:C	A	C	1.07604e-05	-0.614848	0.127578	0.410959	-42450	rs3931560
1	109424701	SYPL2	chr1:109424701:G:C	G	C	1.07604e-05	-0.614848	0.127578	0.410959	-41845	rs11102981
1	109424702	SYPL2	chr1:109424702:C:A	C	A	2.98831e-06	0.670065	0.129521	0.376712	-41844	rs10858097
1	109427099	SYPL2	chr1:109427099:A:G	A	G	1.19625e-05	-0.623883	0.130254	0.417808	-39447	rs4970754
1	109434153	SYPL2	chr1:109434153:C:G	C	G	1.52367e-06	-0.656921	0.12264	0.431507	-32393	rs4970756
1	109435412	SYPL2	chr1:109435412:C:T	C	T	1.52367e-06	-0.656921	0.12264	0.431507	-31134	rs1291916
1	109436580	SYPL2	chr1:109436580:G:A	G	A	9.76624e-07	-0.67779	0.123766	0.410959	-29966	rs4970729
1	109436904	SYPL2	chr1:109436904:T:C	T	C	2.98831e-06	0.670065	0.129521	0.376712	-29642	rs4970730
1	109436995	SYPL2	chr1:109436995:A:G	A	G	2.98831e-06	0.670065	0.129521	0.376712	-29551	rs4970758
1	109439591	SYPL2	chr1:109439591:C:A	C	A	2.98831e-06	0.670065	0.129521	0.376712	-26955	rs4970759
1	109442817	SYPL2	chr1:109442817:A:G	A	G	2.98831e-06	0.670065	0.129521	0.376712	-23729	rs4970760
1	109444050	SYPL2	chr1:109444050:C:A	C	A	1.79874e-06	-0.66466	0.125135	0.417808	-22496	rs6664236
1	109448387	SYPL2	chr1:109448387:C:A	C	A	8.8489e-07	-0.703809	0.127898	0.410959	-18159	rs2043059
1	109449078	SYPL2	chr1:109449078:A:G	A	G	8.8489e-07	-0.703809	0.127898	0.410959	-17468	rs2039694
1	109452776	SYPL2	chr1:109452776:C:T	C	T	3.29275e-06	-0.666215	0.12944	0.39726	-13770	rs4970761
1	109452837	ATXN7L2	chr1:109452837:T:C	T	C	1.45134e-06	0.845373	0.157436	0.417808	-31068	rs4970731
1	109452837	SYPL2	chr1:109452837:T:C	T	C	8.51407e-10	0.82224	0.112336	0.417808	-13709	rs4970731
1	109454067	SYPL2	chr1:109454067:C:A	C	A	8.8489e-07	-0.703809	0.127898	0.410959	-12479	rs9787176
1	109454112	SYPL2	chr1:109454112:C:A	C	A	6.15317e-06	-0.65006	0.130669	0.40411	-12434	rs9787177
1	109454751	SYPL2	chr1:109454751:T:C	T	C	6.15317e-06	-0.65006	0.130669	0.40411	-11795	rs11102984
1	109455764	SYPL2	chr1:109455764:C:T	C	T	6.15317e-06	-0.65006	0.130669	0.40411	-10782	rs12140694
1	109457216	SYPL2	chr1:109457216:A:C	A	C	6.15317e-06	-0.65006	0.130669	0.40411	-9330	rs1933182
1	109459254	SYPL2	chr1:109459254:G:C	G	C	6.15317e-06	-0.65006	0.130669	0.40411	-7292	rs10745357
1	109460664	SYPL2	chr1:109460664:T:G	T	G	8.51407e-10	0.82224	0.112336	0.417808	-5882	rs891380
1	109460664	ATXN7L2	chr1:109460664:T:G	T	G	1.45134e-06	0.845373	0.157436	0.417808	-23241	rs891380
1	109460953	ATXN7L2	chr1:109460953:T:C	T	C	1.45134e-06	0.845373	0.157436	0.417808	-22952	rs6693932
1	109460953	SYPL2	chr1:109460953:T:C	T	C	8.51407e-10	0.82224	0.112336	0.417808	-5593	rs6693932
1	109460983	ATXN7L2	chr1:109460983:A:G	A	G	1.45134e-06	0.845373	0.157436	0.417808	-22922	rs891379
1	109460983	SYPL2	chr1:109460983:A:G	A	G	8.51407e-10	0.82224	0.112336	0.417808	-5563	rs891379
1	109461218	ATXN7L2	chr1:109461218:T:G	T	G	1.45134e-06	0.845373	0.157436	0.417808	-22687	rs2115787
1	109461218	SYPL2	chr1:109461218:T:G	T	G	8.51407e-10	0.82224	0.112336	0.417808	-5328	rs2115787
1	109462368	SYPL2	chr1:109462368:C:T	C	T	8.8489e-07	-0.703809	0.127898	0.410959	-4178	rs2140923
1	109463727	SYPL2	chr1:109463727:G:A	G	A	8.51407e-10	0.82224	0.112336	0.417808	-2819	rs4970763
1	109463727	ATXN7L2	chr1:109463727:G:A	G	A	1.45134e-06	0.845373	0.157436	0.417808	-20178	rs4970763
1	109464331	SYPL2	chr1:109464331:TAGAA:T	TAGAA	T	8.51407e-10	0.82224	0.112336	0.417808	-2215	rs35545924
1	109464331	SYPL2	chr1:109464331:TAGAA:T	TAGAA	T	8.51407e-10	0.82224	0.112336	0.417808	-2215	rs368010826
1	109464331	ATXN7L2	chr1:109464331:TAGAA:T	TAGAA	T	1.45134e-06	0.845373	0.157436	0.417808	-19574	rs35545924
1	109464331	ATXN7L2	chr1:109464331:TAGAA:T	TAGAA	T	1.45134e-06	0.845373	0.157436	0.417808	-19574	rs368010826
1	109465014	SYPL2	chr1:109465014:G:C	G	C	6.15317e-06	-0.65006	0.130669	0.40411	-1532	rs4246517
1	109466029	ATXN7L2	chr1:109466029:G:A	G	A	1.45134e-06	0.845373	0.157436	0.417808	-17876	rs2884752
1	109466029	SYPL2	chr1:109466029:G:A	G	A	8.51407e-10	0.82224	0.112336	0.417808	-517	rs2884752
1	109466098	SYPL2	chr1:109466098:T:A	T	A	1.3923e-09	0.830127	0.115417	0.431507	-448	rs2359652
1	109466098	ATXN7L2	chr1:109466098:T:A	T	A	6.87826e-06	0.813918	0.164627	0.431507	-17807	rs2359652
1	109466156	SYPL2	chr1:109466156:C:T	C	T	6.15317e-06	-0.65006	0.130669	0.40411	-390	rs11101960
1	109466191	ATXN7L2	chr1:109466191:T:C	T	C	1.45134e-06	0.845373	0.157436	0.417808	-17714	rs11101961
1	109466191	SYPL2	chr1:109466191:T:C	T	C	8.51407e-10	0.82224	0.112336	0.417808	-355	rs11101961
1	109466549	SYPL2	chr1:109466549:C:T	C	T	8.51407e-10	0.82224	0.112336	0.417808	3	rs4970765
1	109466549	ATXN7L2	chr1:109466549:C:T	C	T	1.45134e-06	0.845373	0.157436	0.417808	-17356	rs4970765
1	109466812	ATXN7L2	chr1:109466812:A:C	A	C	3.19712e-06	0.806843	0.156518	0.376712	-17093	rs2787015
1	109466812	SYPL2	chr1:109466812:A:C	A	C	3.04229e-12	0.879556	0.100155	0.376712	266	rs2787015
1	109467032	SYPL2	chr1:109467032:AC:A	AC	A	5.77168e-06	-0.637419	0.127674	0.417808	486	rs138525393
1	109467488	ATXN7L2	chr1:109467488:C:G	C	G	1.45134e-06	0.845373	0.157436	0.417808	-16417	rs10857786
1	109467488	SYPL2	chr1:109467488:C:G	C	G	8.51407e-10	0.82224	0.112336	0.417808	942	rs10857786
1	109467667	ATXN7L2	chr1:109467667:C:T	C	T	1.45134e-06	0.845373	0.157436	0.417808	-16238	rs10857787
1	109467667	SYPL2	chr1:109467667:C:T	C	T	8.51407e-10	0.82224	0.112336	0.417808	1121	rs10857787
1	109468327	SYPL2	chr1:109468327:A:G	A	G	8.51407e-10	0.82224	0.112336	0.417808	1781	rs1525916
1	109468327	ATXN7L2	chr1:109468327:A:G	A	G	1.45134e-06	0.845373	0.157436	0.417808	-15578	rs1525916
1	109469526	ATXN7L2	chr1:109469526:A:G	A	G	1.45134e-06	0.845373	0.157436	0.417808	-14379	rs10745305
1	109469526	SYPL2	chr1:109469526:A:G	A	G	8.51407e-10	0.82224	0.112336	0.417808	2980	rs10745305
1	109469564	SYPL2	chr1:109469564:TA:T	TA	T	1.3923e-09	0.830127	0.115417	0.431507	3018	rs35594687
1	109469564	SYPL2	chr1:109469564:TA:T	TA	T	1.3923e-09	0.830127	0.115417	0.431507	3018	rs796938014
1	109469564	ATXN7L2	chr1:109469564:TA:T	TA	T	6.87826e-06	0.813918	0.164627	0.431507	-14341	rs35594687
1	109469564	ATXN7L2	chr1:109469564:TA:T	TA	T	6.87826e-06	0.813918	0.164627	0.431507	-14341	rs796938014
1	109469667	SYPL2	chr1:109469667:G:A	G	A	8.51407e-10	0.82224	0.112336	0.417808	3121	rs10857788
1	109469667	ATXN7L2	chr1:109469667:G:A	G	A	1.45134e-06	0.845373	0.157436	0.417808	-14238	rs10857788
1	109471565	SYPL2	chr1:109471565:A:T	A	T	8.51407e-10	0.82224	0.112336	0.417808	5019	rs11101962
1	109471565	ATXN7L2	chr1:109471565:A:T	A	T	1.45134e-06	0.845373	0.157436	0.417808	-12340	rs11101962
1	109471581	ATXN7L2	chr1:109471581:AT:A	AT	A	1.45134e-06	0.845373	0.157436	0.417808	-12324	rs796078458
1	109471581	ATXN7L2	chr1:109471581:AT:A	AT	A	1.45134e-06	0.845373	0.157436	0.417808	-12324	rs35930265
1	109471581	SYPL2	chr1:109471581:AT:A	AT	A	8.51407e-10	0.82224	0.112336	0.417808	5035	rs796078458
1	109471581	SYPL2	chr1:109471581:AT:A	AT	A	8.51407e-10	0.82224	0.112336	0.417808	5035	rs35930265
1	109472156	SYPL2	chr1:109472156:G:A	G	A	8.51407e-10	0.82224	0.112336	0.417808	5610	rs518697
1	109472156	ATXN7L2	chr1:109472156:G:A	G	A	1.45134e-06	0.845373	0.157436	0.417808	-11749	rs518697
1	109472353	ATXN7L2	chr1:109472353:C:A	C	A	1.45134e-06	0.845373	0.157436	0.417808	-11552	rs529091
1	109472353	SYPL2	chr1:109472353:C:A	C	A	8.51407e-10	0.82224	0.112336	0.417808	5807	rs529091
1	109472561	ATXN7L2	chr1:109472561:G:A	G	A	1.45134e-06	0.845373	0.157436	0.417808	-11344	rs4970767
1	109472561	SYPL2	chr1:109472561:G:A	G	A	8.51407e-10	0.82224	0.112336	0.417808	6015	rs4970767
1	109473110	ATXN7L2	chr1:109473110:C:T	C	T	1.45134e-06	0.845373	0.157436	0.417808	-10795	rs10494040
1	109473110	SYPL2	chr1:109473110:C:T	C	T	8.51407e-10	0.82224	0.112336	0.417808	6564	rs10494040
1	109473756	ATXN7L2	chr1:109473756:A:G	A	G	1.45134e-06	0.845373	0.157436	0.417808	-10149	rs2359653
1	109473756	SYPL2	chr1:109473756:A:G	A	G	8.51407e-10	0.82224	0.112336	0.417808	7210	rs2359653
1	109476380	SYPL2	chr1:109476380:C:T	C	T	8.51407e-10	0.82224	0.112336	0.417808	9834	rs491285
1	109476380	ATXN7L2	chr1:109476380:C:T	C	T	1.45134e-06	0.845373	0.157436	0.417808	-7525	rs491285
1	109480274	SYPL2	chr1:109480274:A:C	A	C	3.72725e-08	0.743945	0.117344	0.39726	13728	rs569670
1	109480810	SYPL2	chr1:109480810:G:A	G	A	3.72725e-08	0.743945	0.117344	0.39726	14264	rs485660
1	109480988	SYPL2	chr1:109480988:G:A	G	A	3.11734e-06	-0.675034	0.130773	0.410959	14442	rs12145677
1	109483259	SYPL2	chr1:109483259:A:G	A	G	3.50015e-07	-0.735659	0.127928	0.417808	16713	rs2781552
1	109484269	SYPL2	chr1:109484269:T:G	T	G	3.11734e-06	-0.675034	0.130773	0.410959	17723	rs573491
1	109509517	AMIGO1	chr1:109509517:A:G	A	G	4.73612e-07	-1.06786	0.188332	0.130137	-210	rs2570972
1	109512587	AMIGO1	chr1:109512587:T:C	T	C	5.51049e-06	-0.808251	0.161477	0.19863	2860	rs6684193
1	109512589	AMIGO1	chr1:109512589:T:C	T	C	5.51049e-06	-0.808251	0.161477	0.19863	2862	rs6684194
1	109512676	AMIGO1	chr1:109512676:C:A	C	A	5.51049e-06	-0.808251	0.161477	0.19863	2949	rs11101966
1	109518426	AMIGO1	chr1:109518426:G:T	G	T	7.58683e-06	-1.13507	0.230855	0.10274	8699	rs553689
1	109523130	AMIGO1	chr1:109523130:C:A	C	A	1.7177e-05	-0.831618	0.177396	0.19863	13403	rs528077
1	109523284	AMIGO1	chr1:109523284:A:G	A	G	5.98411e-06	-0.873743	0.17536	0.191781	13557	rs529773
1	109526177	AMIGO1	chr1:109526177:C:T	C	T	5.98411e-06	-0.873743	0.17536	0.191781	16450	rs543021
1	109526190	AMIGO1	chr1:109526190:T:C	T	C	5.98411e-06	-0.873743	0.17536	0.191781	16463	rs543046
1	109526562	AMIGO1	chr1:109526562:C:G	C	G	1.7177e-05	-0.831618	0.177396	0.19863	16835	rs2692704
1	109526654	AMIGO1	chr1:109526654:G:A	G	A	1.7177e-05	-0.831618	0.177396	0.19863	16927	rs2781560
1	109555517	GSTM2	chr1:109555517:C:T	C	T	6.81759e-06	-0.760635	0.153773	0.184931	-112540	rs72987021
1	109557128	GSTM2	chr1:109557128:G:A	G	A	6.81759e-06	-0.760635	0.153773	0.184931	-110929	rs113792992
1	109560232	GSTM2	chr1:109560232:A:T	A	T	6.81759e-06	-0.760635	0.153773	0.184931	-107825	rs58152165
1	109563713	GSTM2	chr1:109563713:A:G	A	G	6.81759e-06	-0.760635	0.153773	0.184931	-104344	rs59000638
1	109563760	GSTM2	chr1:109563760:T:TA	T	TA	6.81759e-06	-0.760635	0.153773	0.184931	-104297	rs147934676
1	109580179	GSTM2	chr1:109580179:T:C	T	C	6.81759e-06	-0.760635	0.153773	0.184931	-87878	rs59362181
1	109582763	GSTM2	chr1:109582763:G:A	G	A	6.81759e-06	-0.760635	0.153773	0.184931	-85294	rs72987036
1	109583258	GSTM2	chr1:109583258:A:G	A	G	6.81759e-06	-0.760635	0.153773	0.184931	-84799	rs72987038
1	109590426	GSTM2	chr1:109590426:T:C	T	C	6.81759e-06	-0.760635	0.153773	0.184931	-77631	rs72987045
1	109592649	GSTM2	chr1:109592649:T:C	T	C	6.81759e-06	-0.760635	0.153773	0.184931	-75408	rs72987047
1	109594839	GSTM2	chr1:109594839:G:A	G	A	6.81759e-06	-0.760635	0.153773	0.184931	-73218	rs7542287
1	109600183	GSTM2	chr1:109600183:T:C	T	C	2.87885e-06	-1.24683	0.240534	0.0958904	-67874	rs72987053
1	109605708	GSTM2	chr1:109605708:C:T	C	T	5.34747e-06	-0.76319	0.152223	0.191781	-62349	rs72987057
1	109606142	GSTM2	chr1:109606142:C:T	C	T	5.34747e-06	-0.76319	0.152223	0.191781	-61915	rs72987059
1	109608211	GSTM2	chr1:109608211:A:G	A	G	5.34747e-06	-0.76319	0.152223	0.191781	-59846	rs60869358
1	109615218	GSTM2	chr1:109615218:A:G	A	G	5.34747e-06	-0.76319	0.152223	0.191781	-52839	rs72987062
1	109652543	GSTM2	chr1:109652543:G:A	G	A	9.72106e-09	-1.18131	0.176591	0.143836	-15514	rs72987078
1	109655304	GSTM2	chr1:109655304:A:G	A	G	9.72106e-09	-1.18131	0.176591	0.143836	-12753	rs6686777
1	109663396	GSTM2	chr1:109663396:G:A	G	A	9.72106e-09	-1.18131	0.176591	0.143836	-4661	rs58206785
1	109676934	GSTM2	chr1:109676934:C:T	C	T	9.72106e-09	-1.18131	0.176591	0.143836	8877	rs72989277
1	109677286	GSTM2	chr1:109677286:G:A	G	A	9.72106e-09	-1.18131	0.176591	0.143836	9229	rs72989280
1	109677464	GSTM2	chr1:109677464:C:G	C	G	6.59701e-06	-0.696553	0.140559	0.253425	9407	rs12024479
1	109720464	GSTM3	chr1:109720464:C:A	C	A	6.74219e-07	-1.12011	0.200888	0.130137	-20574	rs10776699
1	109725029	GSTM3	chr1:109725029:C:T	C	T	1.30346e-06	-0.776293	0.143794	0.280822	-16009	rs12045101
1	109727471	GSTM3	chr1:109727471:A:C	A	C	7.77926e-07	-1.06609	0.192523	0.150685	-13567	rs11101994
1	109728286	GSTM3	chr1:109728286:T:G	T	G	6.74219e-07	-1.12011	0.200888	0.130137	-12752	rs4540683
1	109728807	GSTM3	chr1:109728807:T:G	T	G	1.44637e-06	-1.08424	0.201885	0.136986	-12231	rs4970775
1	109730023	GSTM3	chr1:109730023:C:T	C	T	6.74219e-07	-1.12011	0.200888	0.130137	-11015	rs4970736
1	109735327	GSTM3	chr1:109735327:T:C	T	C	5.36199e-07	-1.10096	0.19531	0.136986	-5711	rs1109138
1	109736431	GSTM3	chr1:109736431:GT:G	GT	G	1.36967e-06	-1.04185	0.193462	0.157534	-4607	rs796070981
1	109736431	GSTM3	chr1:109736431:GT:G	GT	G	1.36967e-06	-1.04185	0.193462	0.157534	-4607	rs5776997
1	109739319	GSTM3	chr1:109739319:G:A	G	A	2.38339e-08	-1.11173	0.17219	0.164384	-1719	rs10735234
1	109740350	GSTM3	chr1:109740350:G:T	G	T	2.38339e-08	-1.11173	0.17219	0.164384	-688	rs1332018
1	109741163	GSTM3	chr1:109741163:C:T	C	T	5.36199e-07	-1.10096	0.19531	0.136986	125	rs4970777
1	112516598	ST7L	chr1:112516598:T:A	T	A	4.33381e-11	-0.921001	0.113849	0.431507	-102543	rs351372
1	112520503	ST7L	chr1:112520503:A:G	A	G	1.37268e-10	-0.880066	0.112958	0.472603	-98638	rs910697
1	112533195	ST7L	chr1:112533195:C:CCTT	C	CCTT	8.21082e-06	0.784649	0.160301	0.260274	-85946	rs76337244
1	112534134	ST7L	chr1:112534134:T:C	T	C	2.21027e-14	-1.03374	0.102434	0.438356	-85007	rs12728001
1	112538554	ST7L	chr1:112538554:G:A	G	A	1.26034e-17	-1.11387	0.0914381	0.452055	-80587	rs7512948
1	112540817	ST7L	chr1:112540817:C:T	C	T	5.84784e-19	-1.12709	0.0861157	0.472603	-78324	rs10745330
1	112541524	ST7L	chr1:112541524:G:A	G	A	1.37952e-05	0.840072	0.176868	0.226027	-77617	rs3790612
1	112543827	ST7L	chr1:112543827:C:T	C	T	1.37952e-05	0.840072	0.176868	0.226027	-75314	rs7537789
1	112544084	ST7L	chr1:112544084:T:C	T	C	1.37952e-05	0.840072	0.176868	0.226027	-75057	rs7551933
1	112544095	ST7L	chr1:112544095:A:T	A	T	1.37952e-05	0.840072	0.176868	0.226027	-75046	rs7549547
1	112544454	ST7L	chr1:112544454:G:C	G	C	1.37952e-05	0.840072	0.176868	0.226027	-74687	rs6659677
1	112546384	ST7L	chr1:112546384:C:T	C	T	4.15912e-19	-1.12354	0.0851765	0.486301	-72757	rs7544663
1	112546698	ST7L	chr1:112546698:A:T	A	T	2.90304e-18	-1.09065	0.0864823	0.486301	-72443	rs7513716
1	112547074	ST7L	chr1:112547074:T:C	T	C	1.75789e-12	1.00303	0.112373	0.431507	-72067	rs7516421
1	112547487	ST7L	chr1:112547487:T:C	T	C	8.21082e-06	0.784649	0.160301	0.260274	-71654	rs6661642
1	112547807	ST7L	chr1:112547807:G:A	G	A	1.37952e-05	0.840072	0.176868	0.226027	-71334	rs6672761
1	112548033	ST7L	chr1:112548033:C:T	C	T	1.37952e-05	0.840072	0.176868	0.226027	-71108	rs12136781
1	112548865	ST7L	chr1:112548865:C:T	C	T	2.90304e-18	-1.09065	0.0864823	0.486301	-70276	rs10857963
1	112549905	ST7L	chr1:112549905:A:G	A	G	1.96712e-19	-1.11521	0.083116	0.479452	-69236	rs6537743
1	112553039	ST7L	chr1:112553039:C:T	C	T	1.75789e-12	1.00303	0.112373	0.431507	-66102	rs6696991
1	112553326	ST7L	chr1:112553326:T:C	T	C	1.75789e-12	1.00303	0.112373	0.431507	-65815	rs6663922
1	112554124	ST7L	chr1:112554124:C:G	C	G	8.21082e-06	0.784649	0.160301	0.260274	-65017	rs6537744
1	112555227	ST7L	chr1:112555227:A:AAG	A	AAG	1.96712e-19	-1.11521	0.083116	0.479452	-63914	rs35935752
1	112555227	ST7L	chr1:112555227:A:AAG	A	AAG	1.96712e-19	-1.11521	0.083116	0.479452	-63914	rs398069555
1	112555384	ST7L	chr1:112555384:G:T	G	T	2.90304e-18	-1.09065	0.0864823	0.486301	-63757	rs6679414
1	112555393	ST7L	chr1:112555393:A:G	A	G	2.90304e-18	-1.09065	0.0864823	0.486301	-63748	rs10776756
1	112557926	ST7L	chr1:112557926:C:T	C	T	1.37952e-05	0.840072	0.176868	0.226027	-61215	rs3762335
1	112557951	ST7L	chr1:112557951:C:T	C	T	1.37952e-05	0.840072	0.176868	0.226027	-61190	rs17438324
1	112559177	ST7L	chr1:112559177:A:G	A	G	1.37952e-05	0.840072	0.176868	0.226027	-59964	rs7535636
1	112562265	ST7L	chr1:112562265:A:G	A	G	8.21082e-06	0.784649	0.160301	0.260274	-56876	rs6673930
1	112563747	ST7L	chr1:112563747:A:G	A	G	1.96712e-19	-1.11521	0.083116	0.479452	-55394	rs12126277
1	112566652	ST7L	chr1:112566652:T:C	T	C	1.96712e-19	-1.11521	0.083116	0.479452	-52489	rs11102497
1	112567639	ST7L	chr1:112567639:A:G	A	G	1.37952e-05	0.840072	0.176868	0.226027	-51502	rs6693880
1	112567926	ST7L	chr1:112567926:T:C	T	C	1.37952e-05	0.840072	0.176868	0.226027	-51215	rs999923
1	112567997	ST7L	chr1:112567997:T:C	T	C	1.96712e-19	-1.11521	0.083116	0.479452	-51144	rs1001494
1	112570124	ST7L	chr1:112570124:G:A	G	A	1.96712e-19	-1.11521	0.083116	0.479452	-49017	rs1032312
1	112571099	ST7L	chr1:112571099:G:A	G	A	1.37952e-05	0.840072	0.176868	0.226027	-48042	rs35482634
1	112571489	ST7L	chr1:112571489:T:C	T	C	8.21082e-06	0.784649	0.160301	0.260274	-47652	rs7542820
1	112572352	ST7L	chr1:112572352:A:G	A	G	1.37952e-05	0.840072	0.176868	0.226027	-46789	rs6690169
1	112575278	ST7L	chr1:112575278:T:G	T	G	8.21082e-06	0.784649	0.160301	0.260274	-43863	rs12406906
1	112575707	ST7L	chr1:112575707:G:A	G	A	1.37952e-05	0.840072	0.176868	0.226027	-43434	rs12750023
1	112579051	ST7L	chr1:112579051:G:C	G	C	1.26034e-17	-1.11387	0.0914381	0.452055	-40090	rs10776757
1	112580334	ST7L	chr1:112580334:T:G	T	G	1.96712e-19	-1.11521	0.083116	0.479452	-38807	rs7554345
1	112581112	ST7L	chr1:112581112:A:C	A	C	1.96712e-19	-1.11521	0.083116	0.479452	-38029	rs7554916
1	112584815	ST7L	chr1:112584815:A:G	A	G	1.37952e-05	0.840072	0.176868	0.226027	-34326	rs12137107
1	112586506	ST7L	chr1:112586506:A:G	A	G	1.75789e-12	1.00303	0.112373	0.431507	-32635	rs6671645
1	112589739	ST7L	chr1:112589739:T:C	T	C	1.96712e-19	-1.11521	0.083116	0.479452	-29402	rs6669096
1	112589771	ST7L	chr1:112589771:A:G	A	G	1.96712e-19	-1.11521	0.083116	0.479452	-29370	rs6666579
1	112593607	ST7L	chr1:112593607:T:C	T	C	1.96712e-19	-1.11521	0.083116	0.479452	-25534	rs6682737
1	112594421	ST7L	chr1:112594421:G:C	G	C	1.75789e-12	1.00303	0.112373	0.431507	-24720	rs6691917
1	112594599	ST7L	chr1:112594599:C:A	C	A	1.37952e-05	0.840072	0.176868	0.226027	-24542	rs12758377
1	112595488	ST7L	chr1:112595488:A:G	A	G	8.21082e-06	0.784649	0.160301	0.260274	-23653	rs12143068
1	112596574	ST7L	chr1:112596574:G:A	G	A	1.75789e-12	1.00303	0.112373	0.431507	-22567	rs6701351
1	112598304	ST7L	chr1:112598304:C:T	C	T	1.26034e-17	-1.11387	0.0914381	0.452055	-20837	rs4839254
1	112598553	ST7L	chr1:112598553:T:C	T	C	1.75789e-12	1.00303	0.112373	0.431507	-20588	rs11102508
1	112601274	ST7L	chr1:112601274:C:G	C	G	1.37952e-05	0.840072	0.176868	0.226027	-17867	rs6674053
1	112601338	ST7L	chr1:112601338:C:T	C	T	1.37952e-05	0.840072	0.176868	0.226027	-17803	rs6674068
1	112601641	ST7L	chr1:112601641:T:C	T	C	1.23632e-18	-1.10219	0.0856785	0.486301	-17500	rs6691932
1	112602157	ST7L	chr1:112602157:C:T	C	T	8.21082e-06	0.784649	0.160301	0.260274	-16984	rs12125361
1	112602772	ST7L	chr1:112602772:A:G	A	G	1.96712e-19	-1.11521	0.083116	0.479452	-16369	rs11102512
1	112605275	ST7L	chr1:112605275:A:C	A	C	1.75789e-12	1.00303	0.112373	0.431507	-13866	rs7552692
1	112605276	ST7L	chr1:112605276:A:C	A	C	1.75789e-12	1.00303	0.112373	0.431507	-13865	rs7552693
1	112605645	ST7L	chr1:112605645:A:G	A	G	8.21082e-06	0.784649	0.160301	0.260274	-13496	rs12118370
1	112605949	ST7L	chr1:112605949:A:G	A	G	9.99962e-09	0.897862	0.134367	0.363014	-13192	rs61818800
1	112607704	ST7L	chr1:112607704:TA:T	TA	T	1.96712e-19	-1.11521	0.083116	0.479452	-11437	rs796102311
1	112607704	ST7L	chr1:112607704:TA:T	TA	T	1.96712e-19	-1.11521	0.083116	0.479452	-11437	rs34153042
1	112607859	ST7L	chr1:112607859:G:A	G	A	1.37952e-05	0.840072	0.176868	0.226027	-11282	rs7527076
1	112611458	ST7L	chr1:112611458:T:C	T	C	1.75789e-12	1.00303	0.112373	0.431507	-7683	rs6537745
1	112611778	ST7L	chr1:112611778:C:T	C	T	1.96712e-19	-1.11521	0.083116	0.479452	-7363	rs7546094
1	112611907	ST7L	chr1:112611907:C:A	C	A	1.37952e-05	0.840072	0.176868	0.226027	-7234	rs7546203
1	112613328	ST7L	chr1:112613328:A:AG	A	AG	8.21082e-06	0.784649	0.160301	0.260274	-5813	rs11458151
1	112613804	ST7L	chr1:112613804:C:T	C	T	1.96712e-19	-1.11521	0.083116	0.479452	-5337	rs1994604
1	112614432	ST7L	chr1:112614432:C:T	C	T	1.96712e-19	-1.11521	0.083116	0.479452	-4709	rs6700673
1	112614750	ST7L	chr1:112614750:T:C	T	C	1.26034e-17	-1.11387	0.0914381	0.452055	-4391	rs9429486
1	112615667	ST7L	chr1:112615667:G:A	G	A	1.37952e-05	0.840072	0.176868	0.226027	-3474	rs9429694
1	112620907	ST7L	chr1:112620907:G:A	G	A	1.37952e-05	0.840072	0.176868	0.226027	1766	rs6537746
1	112621010	ST7L	chr1:112621010:G:T	G	T	4.12599e-11	0.938735	0.115859	0.40411	1869	rs4838960
1	112621345	ST7L	chr1:112621345:T:C	T	C	1.37952e-05	0.840072	0.176868	0.226027	2204	rs4838961
1	112623613	ST7L	chr1:112623613:G:A	G	A	1.76659e-09	0.873996	0.122565	0.390411	4472	rs11102517
1	112626827	ST7L	chr1:112626827:G:A	G	A	6.33533e-16	1.01773	0.0919585	0.493151	7686	rs7415820
1	112628967	ST7L	chr1:112628967:C:T	C	T	1.26034e-17	-1.11387	0.0914381	0.452055	9826	rs12046208
1	112632807	ST7L	chr1:112632807:T:A	T	A	1.37952e-05	0.840072	0.176868	0.226027	13666	rs4240534
1	112634448	ST7L	chr1:112634448:G:T	G	T	1.37952e-05	0.840072	0.176868	0.226027	15307	rs6691025
1	112636975	ST7L	chr1:112636975:C:T	C	T	4.12599e-11	0.938735	0.115859	0.40411	17834	rs6537747
1	112643094	ST7L	chr1:112643094:CA:C	CA	C	1.05078e-11	0.98113	0.116	0.410959	23953	rs34443777
1	112643094	ST7L	chr1:112643094:CA:C	CA	C	1.05078e-11	0.98113	0.116	0.410959	23953	rs397749421
1	112645797	ST7L	chr1:112645797:C:T	C	T	9.84516e-08	0.781839	0.128475	0.445205	26656	rs6690292
1	112648562	ST7L	chr1:112648562:T:C	T	C	1.37952e-05	0.840072	0.176868	0.226027	29421	rs10857969
1	112649983	ST7L	chr1:112649983:G:A	G	A	1.37952e-05	0.840072	0.176868	0.226027	30842	rs3013441
1	112651699	ST7L	chr1:112651699:G:GT	G	GT	1.49814e-05	0.811615	0.171716	0.239726	32558	rs60973907
1	112653167	ST7L	chr1:112653167:G:A	G	A	6.33533e-16	1.01773	0.0919585	0.493151	34026	rs3013440
1	112655108	ST7L	chr1:112655108:G:A	G	A	6.33533e-16	1.01773	0.0919585	0.493151	35967	rs3103450
1	112655178	ST7L	chr1:112655178:A:G	A	G	6.33533e-16	1.01773	0.0919585	0.493151	36037	rs7524494
1	112655347	ST7L	chr1:112655347:C:T	C	T	1.37952e-05	0.840072	0.176868	0.226027	36206	rs7512984
1	112655469	ST7L	chr1:112655469:A:T	A	T	1.37952e-05	0.840072	0.176868	0.226027	36328	rs9662162
1	112655500	ST7L	chr1:112655500:C:CA	C	CA	1.83554e-10	0.943074	0.122224	0.410959	36359	rs11408839
1	112658049	ST7L	chr1:112658049:T:G	T	G	6.33533e-16	1.01773	0.0919585	0.493151	38908	rs3013439
1	112658175	ST7L	chr1:112658175:G:A	G	A	1.37952e-05	0.840072	0.176868	0.226027	39034	rs2932534
1	112658790	ST7L	chr1:112658790:G:C	G	C	1.37952e-05	0.840072	0.176868	0.226027	39649	rs2932535
1	112659795	ST7L	chr1:112659795:G:A	G	A	6.33533e-16	1.01773	0.0919585	0.493151	40654	rs2932536
1	112662904	ST7L	chr1:112662904:CTGT:C	CTGT	C	1.83149e-08	0.767595	0.117639	0.431507	43763	rs67902829
1	112664298	ST7L	chr1:112664298:A:G	A	G	1.37952e-05	0.840072	0.176868	0.226027	45157	rs6682678
1	112664909	ST7L	chr1:112664909:T:C	T	C	6.33533e-16	1.01773	0.0919585	0.493151	45768	rs12046329
1	112665417	ST7L	chr1:112665417:T:C	T	C	6.33533e-16	1.01773	0.0919585	0.493151	46276	rs12046466
1	112667912	ST7L	chr1:112667912:A:C	A	C	1.37952e-05	0.840072	0.176868	0.226027	48771	rs12048528
1	112671475	ST7L	chr1:112671475:G:A	G	A	1.37952e-05	0.840072	0.176868	0.226027	52334	rs1238
1	112673164	ST7L	chr1:112673164:A:G	A	G	1.37952e-05	0.840072	0.176868	0.226027	54023	rs2932539
1	112673921	ST7L	chr1:112673921:A:G	A	G	1.37952e-05	0.840072	0.176868	0.226027	54780	rs2932538
1	112676766	ST7L	chr1:112676766:A:T	A	T	2.42067e-08	0.892287	0.138288	0.410959	57625	rs4839257
1	112679036	ST7L	chr1:112679036:G:A	G	A	2.6464e-10	0.902544	0.118423	0.5	59895	rs2999155
1	112679834	ST7L	chr1:112679834:G:T	G	T	8.9331e-10	0.860972	0.117827	0.493151	60693	rs2999154
1	112690571	ST7L	chr1:112690571:G:A	G	A	4.97896e-12	-0.922596	0.106622	0.493151	71430	rs2999157
1	112691834	ST7L	chr1:112691834:G:A	G	A	4.97896e-12	-0.922596	0.106622	0.493151	72693	rs2932532
1	112693465	ST7L	chr1:112693465:C:T	C	T	4.97896e-12	-0.922596	0.106622	0.493151	74324	rs902289
1	112693799	ST7L	chr1:112693799:G:A	G	A	4.51831e-13	-1.00337	0.108072	0.431507	74658	rs1110043
1	112699866	ST7L	chr1:112699866:C:T	C	T	1.46411e-10	0.862748	0.110973	0.486301	80725	rs3013431
1	112703607	ST7L	chr1:112703607:T:A	T	A	5.54653e-08	-0.837806	0.13435	0.458904	84466	rs937053
1	112705743	ST7L	chr1:112705743:A:G	A	G	3.75128e-06	0.667096	0.130517	0.486301	86602	rs954679
1	113882968	AP4B1	chr1:113882968:AAAT:A	AAAT	A	1.40213e-06	-0.746507	0.138783	0.130137	-21831	rs148214197
1	113884202	AP4B1	chr1:113884202:T:G	T	G	1.40213e-06	-0.746507	0.138783	0.130137	-20597	rs7524200
1	113884828	AP4B1	chr1:113884828:A:G	A	G	1.40213e-06	-0.746507	0.138783	0.130137	-19971	rs2884603
1	113885255	AP4B1	chr1:113885255:CA:C	CA	C	1.40213e-06	-0.746507	0.138783	0.130137	-19544	rs796218529
1	113885255	AP4B1	chr1:113885255:CA:C	CA	C	1.40213e-06	-0.746507	0.138783	0.130137	-19544	rs34066649
1	113891348	AP4B1	chr1:113891348:T:G	T	G	1.40213e-06	-0.746507	0.138783	0.130137	-13451	rs1217392
1	113893860	AP4B1	chr1:113893860:G:A	G	A	1.40213e-06	-0.746507	0.138783	0.130137	-10939	rs10776775
1	113894348	AP4B1	chr1:113894348:T:C	T	C	1.40213e-06	-0.746507	0.138783	0.130137	-10451	rs10745340
1	113900413	AP4B1	chr1:113900413:C:G	C	G	1.40213e-06	-0.746507	0.138783	0.130137	-4386	rs3789613
1	113900797	AP4B1	chr1:113900797:G:A	G	A	1.40213e-06	-0.746507	0.138783	0.130137	-4002	rs7523862
1	113903719	AP4B1	chr1:113903719:A:G	A	G	1.40213e-06	-0.746507	0.138783	0.130137	-1080	rs10858022
1	113904412	AP4B1	chr1:113904412:G:C	G	C	1.40213e-06	-0.746507	0.138783	0.130137	-387	rs6661817
1	113906130	AP4B1	chr1:113906130:C:T	C	T	1.40213e-06	-0.746507	0.138783	0.130137	1331	rs10858023
1	121485184	SRGAP2C	chr1:121485184:G:T	G	T	0.000272089	0.500668	0.129137	0.280822	300209	rs2319971
1	121497112	SRGAP2C	chr1:121497112:C:T	C	T	7.73339e-05	0.522005	0.122691	0.308219	312137	rs67718113
1	121500516	SRGAP2C	chr1:121500516:G:A	G	A	9.72409e-05	0.500718	0.119587	0.315068	315541	rs12730004
1	121514418	SRGAP2C	chr1:121514418:A:G	A	G	0.000253944	0.484545	0.1243	0.30137	329443	rs12401551
1	121576531	SRGAP2C	chr1:121576531:A:G	A	G	0.000253944	0.484545	0.1243	0.30137	391556	rs6669539
1	121577437	SRGAP2C	chr1:121577437:T:C	T	C	0.000253944	0.484545	0.1243	0.30137	392462	rs28848790
1	121580150	SRGAP2C	chr1:121580150:A:C	A	C	0.000253944	0.484545	0.1243	0.30137	395175	rs28366816
1	121581391	SRGAP2C	chr1:121581391:T:C	T	C	0.000307077	0.496823	0.129387	0.287671	396416	rs28369619
1	1456829	ATAD3C	chr1:1456829:G:C	G	C	1.43797e-09	-0.812618	0.113114	0.273973	7140	rs2936660
1	148328533	NBPF9	chr1:148328533:A:G	A	G	2.24862e-05	0.643741	0.139593	0.0958904	-775018	rs2992455
1	148356184	NBPF9	chr1:148356184:C:T	C	T	6.66795e-05	0.52407	0.12193	0.143836	-747367	rs3009466
1	148356417	NBPF9	chr1:148356417:A:G	A	G	6.66795e-05	0.52407	0.12193	0.143836	-747134	rs2932458
1	150274008	TARS2	chr1:150274008:C:T	C	T	2.69252e-07	0.918723	0.157852	0.116438	-213411	rs73011384
1	150274698	TARS2	chr1:150274698:C:T	C	T	2.69252e-07	0.918723	0.157852	0.116438	-212721	rs113579391
1	150279836	TARS2	chr1:150279836:T:C	T	C	2.69252e-07	0.918723	0.157852	0.116438	-207583	rs16835699
1	150281461	TARS2	chr1:150281461:C:G	C	G	2.69252e-07	0.918723	0.157852	0.116438	-205958	rs16835708
1	150289480	TARS2	chr1:150289480:A:G	A	G	2.69252e-07	0.918723	0.157852	0.116438	-197939	rs57361164
1	150291795	TARS2	chr1:150291795:A:G	A	G	2.69252e-07	0.918723	0.157852	0.116438	-195624	rs73011400
1	150292247	TARS2	chr1:150292247:GT:G	GT	G	2.69252e-07	0.918723	0.157852	0.116438	-195172	rs369956581
1	150292247	TARS2	chr1:150292247:GT:G	GT	G	2.69252e-07	0.918723	0.157852	0.116438	-195172	rs149949172
1	150292940	TARS2	chr1:150292940:A:G	A	G	2.69252e-07	0.918723	0.157852	0.116438	-194479	rs16835782
1	150293419	TARS2	chr1:150293419:A:C	A	C	2.69252e-07	0.918723	0.157852	0.116438	-194000	rs16835791
1	150294483	TARS2	chr1:150294483:T:C	T	C	2.69252e-07	0.918723	0.157852	0.116438	-192936	rs16830437
1	150296764	TARS2	chr1:150296764:A:T	A	T	2.69252e-07	0.918723	0.157852	0.116438	-190655	rs56965166
1	150298822	TARS2	chr1:150298822:G:A	G	A	2.69252e-07	0.918723	0.157852	0.116438	-188597	rs7543314
1	150299612	TARS2	chr1:150299612:G:A	G	A	2.69252e-07	0.918723	0.157852	0.116438	-187807	rs3738322
1	150300021	TARS2	chr1:150300021:A:G	A	G	2.69252e-07	0.918723	0.157852	0.116438	-187398	rs73013119
1	150301195	TARS2	chr1:150301195:C:A	C	A	2.69252e-07	0.918723	0.157852	0.116438	-186224	rs112587175
1	150306902	TARS2	chr1:150306902:A:C	A	C	2.69252e-07	0.918723	0.157852	0.116438	-180517	rs16835911
1	150308969	TARS2	chr1:150308969:T:C	T	C	2.69252e-07	0.918723	0.157852	0.116438	-178450	rs73013129
1	150311410	TARS2	chr1:150311410:C:T	C	T	2.69252e-07	0.918723	0.157852	0.116438	-176009	rs112097040
1	150313156	TARS2	chr1:150313156:G:A	G	A	2.69252e-07	0.918723	0.157852	0.116438	-174263	rs113720135
1	150313374	TARS2	chr1:150313374:C:T	C	T	2.69252e-07	0.918723	0.157852	0.116438	-174045	rs60531845
1	150317012	TARS2	chr1:150317012:C:A	C	A	2.69252e-07	0.918723	0.157852	0.116438	-170407	rs112511224
1	150318522	TARS2	chr1:150318522:C:T	C	T	2.69252e-07	0.918723	0.157852	0.116438	-168897	rs58516261
1	150320968	TARS2	chr1:150320968:A:G	A	G	2.69252e-07	0.918723	0.157852	0.116438	-166451	rs73015063
1	150324787	TARS2	chr1:150324787:T:C	T	C	2.69252e-07	0.918723	0.157852	0.116438	-162632	rs60758881
1	150328048	TARS2	chr1:150328048:A:G	A	G	2.69252e-07	0.918723	0.157852	0.116438	-159371	rs2275779
1	150330774	TARS2	chr1:150330774:T:C	T	C	2.69252e-07	0.918723	0.157852	0.116438	-156645	rs4926420
1	150331200	TARS2	chr1:150331200:A:G	A	G	2.69252e-07	0.918723	0.157852	0.116438	-156219	rs112431552
1	150331264	TARS2	chr1:150331264:C:G	C	G	2.69252e-07	0.918723	0.157852	0.116438	-156155	rs112265199
1	150331637	TARS2	chr1:150331637:T:G	T	G	2.69252e-07	0.918723	0.157852	0.116438	-155782	rs6700607
1	150334000	TARS2	chr1:150334000:A:G	A	G	2.69252e-07	0.918723	0.157852	0.116438	-153419	rs80215841
1	150335534	TARS2	chr1:150335534:C:T	C	T	2.69252e-07	0.918723	0.157852	0.116438	-151885	rs60730811
1	150336436	TARS2	chr1:150336436:G:A	G	A	2.69252e-07	0.918723	0.157852	0.116438	-150983	rs6679726
1	150336897	TARS2	chr1:150336897:T:C	T	C	2.69252e-07	0.918723	0.157852	0.116438	-150522	rs73015078
1	150337165	TARS2	chr1:150337165:A:T	A	T	2.69252e-07	0.918723	0.157852	0.116438	-150254	rs58373639
1	150337684	TARS2	chr1:150337684:A:C	A	C	2.69252e-07	0.918723	0.157852	0.116438	-149735	rs6700009
1	150341285	TARS2	chr1:150341285:T:C	T	C	2.69252e-07	0.918723	0.157852	0.116438	-146134	rs73015081
1	150343789	TARS2	chr1:150343789:A:C	A	C	2.69252e-07	0.918723	0.157852	0.116438	-143630	rs16836130
1	150345893	TARS2	chr1:150345893:G:A	G	A	2.69252e-07	0.918723	0.157852	0.116438	-141526	rs16836139
1	150348146	TARS2	chr1:150348146:G:A	G	A	2.69252e-07	0.918723	0.157852	0.116438	-139273	rs57163995
1	150349322	TARS2	chr1:150349322:T:G	T	G	2.69252e-07	0.918723	0.157852	0.116438	-138097	rs3737319
1	150356548	TARS2	chr1:150356548:C:T	C	T	1.46628e-05	0.724888	0.15317	0.123288	-130871	rs61605510
1	150357345	TARS2	chr1:150357345:G:T	G	T	1.46628e-05	0.724888	0.15317	0.123288	-130074	rs73015095
1	150358961	TARS2	chr1:150358961:G:A	G	A	1.46628e-05	0.724888	0.15317	0.123288	-128458	rs73015096
1	150359534	TARS2	chr1:150359534:C:T	C	T	1.46628e-05	0.724888	0.15317	0.123288	-127885	rs112543647
1	150361216	TARS2	chr1:150361216:G:A	G	A	1.46628e-05	0.724888	0.15317	0.123288	-126203	rs112896715
1	150366137	TARS2	chr1:150366137:T:C	T	C	1.46628e-05	0.724888	0.15317	0.123288	-121282	rs16836442
1	150369289	TARS2	chr1:150369289:G:A	G	A	1.46628e-05	0.724888	0.15317	0.123288	-118130	rs73017006
1	150375859	TARS2	chr1:150375859:A:G	A	G	1.46628e-05	0.724888	0.15317	0.123288	-111560	rs3850843
1	150378525	TARS2	chr1:150378525:T:C	T	C	1.46628e-05	0.724888	0.15317	0.123288	-108894	rs16836576
1	150380527	TARS2	chr1:150380527:T:C	T	C	1.46628e-05	0.724888	0.15317	0.123288	-106892	rs73017073
1	150382108	TARS2	chr1:150382108:T:C	T	C	1.46628e-05	0.724888	0.15317	0.123288	-105311	rs16836594
1	150383867	TARS2	chr1:150383867:T:C	T	C	1.46628e-05	0.724888	0.15317	0.123288	-103552	rs16836601
1	150383949	TARS2	chr1:150383949:A:G	A	G	1.46628e-05	0.724888	0.15317	0.123288	-103470	rs60459288
1	150396312	TARS2	chr1:150396312:C:T	C	T	1.46628e-05	0.724888	0.15317	0.123288	-91107	rs59367061
1	150396403	TARS2	chr1:150396403:G:T	G	T	1.46628e-05	0.724888	0.15317	0.123288	-91016	rs56909494
1	150399029	TARS2	chr1:150399029:G:T	G	T	1.46628e-05	0.724888	0.15317	0.123288	-88390	rs56882505
1	150402236	TARS2	chr1:150402236:G:A	G	A	1.46628e-05	0.724888	0.15317	0.123288	-85183	rs59639798
1	150404152	TARS2	chr1:150404152:T:C	T	C	1.46628e-05	0.724888	0.15317	0.123288	-83267	rs73017086
1	150407375	TARS2	chr1:150407375:G:T	G	T	1.46628e-05	0.724888	0.15317	0.123288	-80044	rs76176241
1	150407888	TARS2	chr1:150407888:C:G	C	G	1.46628e-05	0.724888	0.15317	0.123288	-79531	rs16836786
1	150408263	TARS2	chr1:150408263:C:G	C	G	1.46628e-05	0.724888	0.15317	0.123288	-79156	rs111982037
1	150412100	TARS2	chr1:150412100:G:T	G	T	1.46628e-05	0.724888	0.15317	0.123288	-75319	rs73017092
1	150413024	TARS2	chr1:150413024:G:A	G	A	1.46628e-05	0.724888	0.15317	0.123288	-74395	rs4926430
1	150414474	TARS2	chr1:150414474:AG:A	AG	A	1.46628e-05	0.724888	0.15317	0.123288	-72945	rs377008971
1	150414474	TARS2	chr1:150414474:AG:A	AG	A	1.46628e-05	0.724888	0.15317	0.123288	-72945	rs111802234
1	150419470	TARS2	chr1:150419470:A:G	A	G	1.46628e-05	0.724888	0.15317	0.123288	-67949	rs59378360
1	150419916	TARS2	chr1:150419916:A:G	A	G	1.46628e-05	0.724888	0.15317	0.123288	-67503	rs112490454
1	150423941	TARS2	chr1:150423941:C:G	C	G	1.46628e-05	0.724888	0.15317	0.123288	-63478	rs113371939
1	150424393	TARS2	chr1:150424393:G:A	G	A	1.46628e-05	0.724888	0.15317	0.123288	-63026	rs113006944
1	150425401	TARS2	chr1:150425401:T:C	T	C	1.46628e-05	0.724888	0.15317	0.123288	-62018	rs147729724
1	150425726	TARS2	chr1:150425726:G:A	G	A	1.46628e-05	0.724888	0.15317	0.123288	-61693	rs59662772
1	150431280	TARS2	chr1:150431280:G:A	G	A	1.46628e-05	0.724888	0.15317	0.123288	-56139	rs73017102
1	150431729	TARS2	chr1:150431729:T:C	T	C	1.46628e-05	0.724888	0.15317	0.123288	-55690	rs112235324
1	150436861	TARS2	chr1:150436861:C:T	C	T	1.46628e-05	0.724888	0.15317	0.123288	-50558	rs111607509
1	150437782	TARS2	chr1:150437782:G:A	G	A	1.46628e-05	0.724888	0.15317	0.123288	-49637	rs111400442
1	150437889	TARS2	chr1:150437889:C:T	C	T	1.46628e-05	0.724888	0.15317	0.123288	-49530	rs113274217
1	150438816	TARS2	chr1:150438816:G:A	G	A	1.46628e-05	0.724888	0.15317	0.123288	-48603	rs57971032
1	150439031	TARS2	chr1:150439031:C:T	C	T	1.46628e-05	0.724888	0.15317	0.123288	-48388	rs113408614
1	150446320	TARS2	chr1:150446320:C:T	C	T	1.46628e-05	0.724888	0.15317	0.123288	-41099	rs16836943
1	150446919	TARS2	chr1:150446919:T:C	T	C	1.46628e-05	0.724888	0.15317	0.123288	-40500	rs112272272
1	150447125	TARS2	chr1:150447125:G:A	G	A	1.46628e-05	0.724888	0.15317	0.123288	-40294	rs111617892
1	150449178	TARS2	chr1:150449178:T:C	T	C	1.46628e-05	0.724888	0.15317	0.123288	-38241	rs73019017
1	150449489	TARS2	chr1:150449489:T:C	T	C	1.46628e-05	0.724888	0.15317	0.123288	-37930	rs73019018
1	150449795	TARS2	chr1:150449795:G:A	G	A	1.46628e-05	0.724888	0.15317	0.123288	-37624	rs73019020
1	150450072	TARS2	chr1:150450072:T:A	T	A	1.46628e-05	0.724888	0.15317	0.123288	-37347	rs73019021
1	150451706	TARS2	chr1:150451706:A:G	A	G	1.46628e-05	0.724888	0.15317	0.123288	-35713	rs6680391
1	150455501	TARS2	chr1:150455501:CA:C	CA	C	1.46628e-05	0.724888	0.15317	0.123288	-31918	rs587732943
1	150457631	TARS2	chr1:150457631:GA:G	GA	G	1.46628e-05	0.724888	0.15317	0.123288	-29788	rs371028395
1	150457631	TARS2	chr1:150457631:GA:G	GA	G	1.46628e-05	0.724888	0.15317	0.123288	-29788	rs111764394
1	150458076	TARS2	chr1:150458076:C:T	C	T	1.46628e-05	0.724888	0.15317	0.123288	-29343	rs73019027
1	150464020	TARS2	chr1:150464020:A:G	A	G	1.46628e-05	0.724888	0.15317	0.123288	-23399	rs57272513
1	150464807	TARS2	chr1:150464807:G:C	G	C	1.46628e-05	0.724888	0.15317	0.123288	-22612	rs73019028
1	150465991	TARS2	chr1:150465991:C:A	C	A	1.46628e-05	0.724888	0.15317	0.123288	-21428	rs111536367
1	150474454	TARS2	chr1:150474454:CAT:C	CAT	C	1.46628e-05	0.724888	0.15317	0.123288	-12965	rs140509417
1	150476212	TARS2	chr1:150476212:G:T	G	T	1.46628e-05	0.724888	0.15317	0.123288	-11207	rs13057
1	150484189	TARS2	chr1:150484189:G:A	G	A	1.46628e-05	0.724888	0.15317	0.123288	-3230	rs113887124
1	150487417	TARS2	chr1:150487417:CTGTT:C	CTGTT	C	1.46628e-05	0.724888	0.15317	0.123288	-2	rs28372874
1	150487417	TARS2	chr1:150487417:CTGTT:C	CTGTT	C	1.46628e-05	0.724888	0.15317	0.123288	-2	rs3840448
1	150487872	TARS2	chr1:150487872:C:T	C	T	1.46628e-05	0.724888	0.15317	0.123288	453	rs2275245
1	150489285	TARS2	chr1:150489285:AC:A	AC	A	1.46628e-05	0.724888	0.15317	0.123288	1866	rs3839012
1	150489612	TARS2	chr1:150489612:C:G	C	G	1.46628e-05	0.724888	0.15317	0.123288	2193	rs871527
1	150492795	TARS2	chr1:150492795:G:A	G	A	4.13213e-05	0.710388	0.160097	0.116438	5376	rs111842933
1	150494737	TARS2	chr1:150494737:C:CA	C	CA	4.13213e-05	0.710388	0.160097	0.116438	7318	rs143706301
1	150496780	TARS2	chr1:150496780:G:T	G	T	4.13213e-05	0.710388	0.160097	0.116438	9361	rs953127
1	150506062	TARS2	chr1:150506062:TGAG:T	TGAG	T	4.13213e-05	0.710388	0.160097	0.116438	18643	rs3834087
1	150506062	TARS2	chr1:150506062:TGAG:T	TGAG	T	4.13213e-05	0.710388	0.160097	0.116438	18643	rs796896945
1	150513123	TARS2	chr1:150513123:G:A	G	A	8.17005e-07	0.922418	0.166974	0.109589	25704	rs73019054
1	150517894	TARS2	chr1:150517894:C:T	C	T	8.17005e-07	0.922418	0.166974	0.109589	30475	rs58419446
1	150519638	TARS2	chr1:150519638:T:C	T	C	1.00525e-05	0.812266	0.167878	0.116438	32219	rs12129037
1	150521081	TARS2	chr1:150521081:G:A	G	A	8.17005e-07	0.922418	0.166974	0.109589	33662	rs113872537
1	150522793	TARS2	chr1:150522793:T:C	T	C	8.17005e-07	0.922418	0.166974	0.109589	35374	rs79524321
1	150523912	TARS2	chr1:150523912:C:G	C	G	1.00525e-05	0.812266	0.167878	0.116438	36493	rs66464034
1	150526251	TARS2	chr1:150526251:A:G	A	G	2.40642e-06	0.840391	0.160611	0.123288	38832	rs147537877
1	150526819	TARS2	chr1:150526819:A:G	A	G	2.40642e-06	0.840391	0.160611	0.123288	39400	rs149768933
1	150527609	TARS2	chr1:150527609:A:G	A	G	2.40642e-06	0.840391	0.160611	0.123288	40190	rs66866430
1	150531579	TARS2	chr1:150531579:A:G	A	G	2.40642e-06	0.840391	0.160611	0.123288	44160	rs72700806
1	152078092	PI4KB	chr1:152078092:AG:A	AG	A	6.15059e-06	0.6636	0.133387	0.157534	750676	rs149857521
1	152078676	PI4KB	chr1:152078676:C:T	C	T	6.15059e-06	0.6636	0.133387	0.157534	751260	rs55711636
1	153658722	SNAPIN	chr1:153658722:T:C	T	C	1.00258e-08	1.19446	0.178772	0.116438	19	rs58021050
1	153659408	SNAPIN	chr1:153659408:A:G	A	G	1.00258e-08	1.19446	0.178772	0.116438	705	rs16835481
1	153683592	SNAPIN	chr1:153683592:T:C	T	C	1.22725e-05	0.974389	0.203738	0.130137	24889	rs57627617
1	153701601	SNAPIN	chr1:153701601:T:C	T	C	1.58774e-05	0.594186	0.126151	0.335616	42898	rs143622268
1	153702087	SNAPIN	chr1:153702087:G:C	G	C	1.58774e-05	0.594186	0.126151	0.335616	43384	rs7547790
1	153755763	SNAPIN	chr1:153755763:A:G	A	G	1.09672e-05	0.609609	0.126631	0.390411	97060	rs9427216
1	153755982	SNAPIN	chr1:153755982:A:G	A	G	1.09672e-05	0.609609	0.126631	0.390411	97279	rs9427217
1	153760164	SNAPIN	chr1:153760164:A:G	A	G	2.86975e-05	0.629996	0.138704	0.349315	101461	rs7554642
1	153766793	SNAPIN	chr1:153766793:A:G	A	G	1.34071e-05	0.603773	0.126903	0.383562	108090	rs6677628
1	153785561	SNAPIN	chr1:153785561:T:C	T	C	1.68904e-05	1.20203	0.25615	0.0616438	126858	rs76923387
1	153793832	SNAPIN	chr1:153793832:T:C	T	C	1.27501e-05	1.27159	0.266476	0.0547945	135129	rs146653507
1	153807355	SNAPIN	chr1:153807355:C:T	C	T	1.27501e-05	1.27159	0.266476	0.0547945	148652	rs1139619
1	153810601	SNAPIN	chr1:153810601:C:T	C	T	1.27501e-05	1.27159	0.266476	0.0547945	151898	rs114840453
1	153864317	SNAPIN	chr1:153864317:T:C	T	C	1.27501e-05	1.27159	0.266476	0.0547945	205614	rs61608495
1	153870166	SNAPIN	chr1:153870166:G:C	G	C	1.27501e-05	1.27159	0.266476	0.0547945	211463	rs147372792
1	153871212	SNAPIN	chr1:153871212:G:T	G	T	1.27501e-05	1.27159	0.266476	0.0547945	212509	rs149921397
1	153879677	SNAPIN	chr1:153879677:C:A	C	A	1.27501e-05	1.27159	0.266476	0.0547945	220974	rs150284367
1	153957562	SNAPIN	chr1:153957562:C:T	C	T	1.27501e-05	1.27159	0.266476	0.0547945	298859	rs114167528
1	153976013	SNAPIN	chr1:153976013:T:C	T	C	1.27501e-05	1.27159	0.266476	0.0547945	317310	rs116396801
1	154008966	SNAPIN	chr1:154008966:G:A	G	A	1.27501e-05	1.27159	0.266476	0.0547945	350263	rs150490996
1	154029019	SNAPIN	chr1:154029019:G:A	G	A	1.27501e-05	1.27159	0.266476	0.0547945	370316	rs115867878
1	154059038	SNAPIN	chr1:154059038:A:T	A	T	2.46514e-05	1.19231	0.260023	0.0616438	400335	rs114941115
1	154126764	SNAPIN	chr1:154126764:C:T	C	T	2.46514e-05	1.19231	0.260023	0.0616438	468061	rs114606464
1	154133387	SNAPIN	chr1:154133387:C:CA	C	CA	2.46514e-05	1.19231	0.260023	0.0616438	474684	rs200523297
1	154155310	SNAPIN	chr1:154155310:TA:T	TA	T	2.46514e-05	1.19231	0.260023	0.0616438	496607	rs142425265
1	154167548	SNAPIN	chr1:154167548:C:T	C	T	2.46514e-05	1.19231	0.260023	0.0616438	508845	rs74731791
1	154247183	SNAPIN	chr1:154247183:T:C	T	C	1.61699e-05	1.25851	0.267485	0.0616438	588480	rs79684631
1	154283574	SNAPIN	chr1:154283574:A:T	A	T	1.61699e-05	1.25851	0.267485	0.0616438	624871	rs577977378
1	155641993	YY1AP1	chr1:155641993:A:C	A	C	6.36676e-06	-1.23766	0.249256	0.0547945	-46781	rs7524589
1	155642710	YY1AP1	chr1:155642710:G:A	G	A	4.44124e-06	-1.04357	0.206044	0.0753425	-46064	rs58816734
1	155644286	YY1AP1	chr1:155644286:G:A	G	A	4.44124e-06	-1.04357	0.206044	0.0753425	-44488	rs72997183
1	155646690	YY1AP1	chr1:155646690:A:T	A	T	4.44124e-06	-1.04357	0.206044	0.0753425	-42084	rs112845307
1	155647428	YY1AP1	chr1:155647428:C:T	C	T	4.44124e-06	-1.04357	0.206044	0.0753425	-41346	rs111950046
1	155654601	YY1AP1	chr1:155654601:C:T	C	T	4.44124e-06	-1.04357	0.206044	0.0753425	-34173	rs7534941
1	155654726	YY1AP1	chr1:155654726:C:T	C	T	4.44124e-06	-1.04357	0.206044	0.0753425	-34048	rs7535114
1	155655939	YY1AP1	chr1:155655939:AAAAC:A	AAAAC	A	4.44124e-06	-1.04357	0.206044	0.0753425	-32835	rs139080272
1	155655939	YY1AP1	chr1:155655939:AAAAC:A	AAAAC	A	4.44124e-06	-1.04357	0.206044	0.0753425	-32835	rs57228833
1	155657335	YY1AP1	chr1:155657335:C:T	C	T	4.44124e-06	-1.04357	0.206044	0.0753425	-31439	rs72997201
1	155657740	YY1AP1	chr1:155657740:C:T	C	T	4.44124e-06	-1.04357	0.206044	0.0753425	-31034	rs72997202
1	155660191	YY1AP1	chr1:155660191:C:T	C	T	6.36676e-06	-1.23766	0.249256	0.0547945	-28583	rs145852062
1	155660606	YY1AP1	chr1:155660606:T:C	T	C	6.36676e-06	-1.23766	0.249256	0.0547945	-28168	rs113197997
1	155662164	YY1AP1	chr1:155662164:AG:A	AG	A	4.44124e-06	-1.04357	0.206044	0.0753425	-26610	rs199595815
1	155663455	YY1AP1	chr1:155663455:C:T	C	T	4.44124e-06	-1.04357	0.206044	0.0753425	-25319	rs113245628
1	155670720	YY1AP1	chr1:155670720:G:C	G	C	4.44124e-06	-1.04357	0.206044	0.0753425	-18054	rs72999012
1	155675193	YY1AP1	chr1:155675193:C:G	C	G	4.44124e-06	-1.04357	0.206044	0.0753425	-13581	rs6667819
1	155676006	YY1AP1	chr1:155676006:G:A	G	A	4.44124e-06	-1.04357	0.206044	0.0753425	-12768	rs111704839
1	155676253	YY1AP1	chr1:155676253:GA:G	GA	G	6.36676e-06	-1.23766	0.249256	0.0547945	-12521	rs199682656
1	155680996	YY1AP1	chr1:155680996:A:G	A	G	4.44124e-06	-1.04357	0.206044	0.0753425	-7778	rs59938922
1	155682884	YY1AP1	chr1:155682884:G:A	G	A	4.44124e-06	-1.04357	0.206044	0.0753425	-5890	rs113211961
1	155684353	YY1AP1	chr1:155684353:A:G	A	G	4.44124e-06	-1.04357	0.206044	0.0753425	-4421	rs58368406
1	155696890	YY1AP1	chr1:155696890:C:G	C	G	4.16119e-06	-1.10614	0.217627	0.0684932	8116	rs72999050
1	155702591	YY1AP1	chr1:155702591:T:C	T	C	4.16119e-06	-1.10614	0.217627	0.0684932	13817	rs72999069
1	156240066	GLMP	chr1:156240066:C:T	C	T	2.46367e-08	-0.87615	0.135883	0.226027	-55613	rs1543294
1	156240766	GLMP	chr1:156240766:C:T	C	T	3.28651e-06	-0.713818	0.138675	0.246575	-54913	rs12090516
1	156246108	GLMP	chr1:156246108:G:A	G	A	5.07501e-08	-0.613097	0.097951	0.438356	-49571	rs2075165
1	156247610	GLMP	chr1:156247610:C:T	C	T	9.31942e-06	-0.816713	0.168063	0.136986	-48069	rs12401854
1	156249659	GLMP	chr1:156249659:A:G	A	G	2.99766e-07	-0.590541	0.101963	0.452055	-46020	rs1804999
1	156250265	GLMP	chr1:156250265:T:C	T	C	5.28435e-07	-0.591442	0.104849	0.363014	-45414	rs1043165
1	156254513	GLMP	chr1:156254513:T:C	T	C	2.99766e-07	-0.590541	0.101963	0.452055	-41166	rs7542798
1	156254865	GLMP	chr1:156254865:G:A	G	A	9.68579e-09	-0.868951	0.129879	0.239726	-40814	rs7552992
1	156254935	GLMP	chr1:156254935:A:C	A	C	2.99766e-07	-0.590541	0.101963	0.452055	-40744	rs7542993
1	156255004	GLMP	chr1:156255004:C:T	C	T	2.99766e-07	-0.590541	0.101963	0.452055	-40675	rs10908492
1	156257159	GLMP	chr1:156257159:T:A	T	A	1.57618e-09	-0.831001	0.116056	0.267123	-38520	rs6699349
1	156257159	PAQR6	chr1:156257159:T:A	T	A	5.917e-06	-0.737478	0.147919	0.267123	9103	rs6699349
1	156258317	GLMP	chr1:156258317:C:T	C	T	1.57618e-09	-0.831001	0.116056	0.267123	-37362	rs6669805
1	156258317	PAQR6	chr1:156258317:C:T	C	T	5.917e-06	-0.737478	0.147919	0.267123	10261	rs6669805
1	156258753	PAQR6	chr1:156258753:G:A	G	A	5.917e-06	-0.737478	0.147919	0.267123	10697	rs6693732
1	156258753	GLMP	chr1:156258753:G:A	G	A	1.57618e-09	-0.831001	0.116056	0.267123	-36926	rs6693732
1	156260211	GLMP	chr1:156260211:G:A	G	A	9.21949e-10	-0.914267	0.125261	0.232877	-35468	rs2287026
1	156260350	GLMP	chr1:156260350:T:A	T	A	1.57618e-09	-0.831001	0.116056	0.267123	-35329	rs2287025
1	156260350	PAQR6	chr1:156260350:T:A	T	A	5.917e-06	-0.737478	0.147919	0.267123	12294	rs2287025
1	156260415	GLMP	chr1:156260415:C:A	C	A	1.57618e-09	-0.831001	0.116056	0.267123	-35264	rs2287024
1	156260415	PAQR6	chr1:156260415:C:A	C	A	5.917e-06	-0.737478	0.147919	0.267123	12359	rs2287024
1	156260814	GLMP	chr1:156260814:C:G	C	G	9.21949e-10	-0.914267	0.125261	0.232877	-34865	rs7533548
1	156261145	GLMP	chr1:156261145:A:G	A	G	2.99766e-07	-0.590541	0.101963	0.452055	-34534	rs759329
1	156261475	PAQR6	chr1:156261475:G:C	G	C	5.917e-06	-0.737478	0.147919	0.267123	13419	rs759328
1	156261475	GLMP	chr1:156261475:G:C	G	C	1.57618e-09	-0.831001	0.116056	0.267123	-34204	rs759328
1	156261693	PAQR6	chr1:156261693:G:A	G	A	5.917e-06	-0.737478	0.147919	0.267123	13637	rs2365152
1	156261693	GLMP	chr1:156261693:G:A	G	A	1.57618e-09	-0.831001	0.116056	0.267123	-33986	rs2365152
1	156261934	GLMP	chr1:156261934:C:A	C	A	1.57618e-09	-0.831001	0.116056	0.267123	-33745	rs2093487
1	156261934	PAQR6	chr1:156261934:C:A	C	A	5.917e-06	-0.737478	0.147919	0.267123	13878	rs2093487
1	156262407	PAQR6	chr1:156262407:C:T	C	T	5.917e-06	-0.737478	0.147919	0.267123	14351	rs12066033
1	156262407	GLMP	chr1:156262407:C:T	C	T	1.57618e-09	-0.831001	0.116056	0.267123	-33272	rs12066033
1	156262845	GLMP	chr1:156262845:A:AT	A	AT	9.21949e-10	-0.914267	0.125261	0.232877	-32834	rs77115125
1	156262946	GLMP	chr1:156262946:A:T	A	T	9.21949e-10	-0.914267	0.125261	0.232877	-32733	rs61814770
1	156263688	GLMP	chr1:156263688:T:C	T	C	9.21949e-10	-0.914267	0.125261	0.232877	-31991	rs4661036
1	156264217	GLMP	chr1:156264217:G:A	G	A	9.21949e-10	-0.914267	0.125261	0.232877	-31462	rs77234346
1	156264648	GLMP	chr1:156264648:T:G	T	G	2.99766e-07	-0.590541	0.101963	0.452055	-31031	rs7512751
1	156264847	GLMP	chr1:156264847:G:A	G	A	9.21949e-10	-0.914267	0.125261	0.232877	-30832	rs7523099
1	156265329	GLMP	chr1:156265329:T:C	T	C	2.99766e-07	-0.590541	0.101963	0.452055	-30350	rs933489
1	156268688	PAQR6	chr1:156268688:C:T	C	T	9.17831e-06	-0.748608	0.153914	0.239726	20632	rs4661037
1	156268688	GLMP	chr1:156268688:C:T	C	T	1.35304e-10	-0.896345	0.114993	0.239726	-26991	rs4661037
1	156271044	PAQR6	chr1:156271044:A:C	A	C	1.85943e-06	-0.658767	0.124236	0.39726	22988	rs16837272
1	156274030	GLMP	chr1:156274030:C:T	C	T	1.0694e-07	-0.58779	0.0969339	0.363014	-21649	rs12128955
1	156275454	GLMP	chr1:156275454:T:C	T	C	1.0694e-07	-0.58779	0.0969339	0.363014	-20225	rs9943105
1	156275727	PAQR6	chr1:156275727:C:CT	C	CT	7.64621e-07	-0.781217	0.140961	0.232877	27671	rs5777974
1	156275727	PAQR6	chr1:156275727:C:CT	C	CT	7.64621e-07	-0.781217	0.140961	0.232877	27671	rs397761378
1	156275727	GLMP	chr1:156275727:C:CT	C	CT	2.39343e-12	-0.906519	0.102492	0.232877	-19952	rs5777974
1	156275727	GLMP	chr1:156275727:C:CT	C	CT	2.39343e-12	-0.906519	0.102492	0.232877	-19952	rs397761378
1	156276682	GLMP	chr1:156276682:G:C	G	C	1.0694e-07	-0.58779	0.0969339	0.363014	-18997	rs7542045
1	156276937	PAQR6	chr1:156276937:T:G	T	G	5.43762e-07	-0.794979	0.141122	0.226027	28881	rs2277872
1	156276937	GLMP	chr1:156276937:T:G	T	G	7.1723e-13	-0.926272	0.101099	0.226027	-18742	rs2277872
1	156279714	GLMP	chr1:156279714:A:G	A	G	1.0694e-07	-0.58779	0.0969339	0.363014	-15965	rs6701440
1	156287122	GLMP	chr1:156287122:C:A	C	A	7.1723e-13	-0.926272	0.101099	0.226027	-8557	rs2104404
1	156287122	PAQR6	chr1:156287122:C:A	C	A	5.43762e-07	-0.794979	0.141122	0.226027	39066	rs2104404
1	156288712	GLMP	chr1:156288712:A:T	A	T	7.1723e-13	-0.926272	0.101099	0.226027	-6967	rs4661038
1	156288712	PAQR6	chr1:156288712:A:T	A	T	5.43762e-07	-0.794979	0.141122	0.226027	40656	rs4661038
1	156290761	PAQR6	chr1:156290761:G:A	G	A	5.43762e-07	-0.794979	0.141122	0.226027	42705	rs7537271
1	156290761	GLMP	chr1:156290761:G:A	G	A	7.1723e-13	-0.926272	0.101099	0.226027	-4918	rs7537271
1	156290853	GLMP	chr1:156290853:T:A	T	A	1.63986e-11	-0.87431	0.104807	0.232877	-4826	rs4997909
1	156290853	PAQR6	chr1:156290853:T:A	T	A	5.41031e-07	-0.781481	0.138693	0.232877	42797	rs4997909
1	156291700	PAQR6	chr1:156291700:G:C	G	C	5.43762e-07	-0.794979	0.141122	0.226027	43644	rs3795728
1	156291700	GLMP	chr1:156291700:G:C	G	C	7.1723e-13	-0.926272	0.101099	0.226027	-3979	rs3795728
1	156297689	GLMP	chr1:156297689:T:G	T	G	2.81168e-07	-0.569515	0.0980453	0.363014	2010	rs12072638
1	156298539	GLMP	chr1:156298539:C:G	C	G	7.1723e-13	-0.926272	0.101099	0.226027	2860	rs7523827
1	156298539	PAQR6	chr1:156298539:C:G	C	G	5.43762e-07	-0.794979	0.141122	0.226027	50483	rs7523827
1	156300270	GLMP	chr1:156300270:G:A	G	A	7.1723e-13	-0.926272	0.101099	0.226027	4591	rs12079226
1	156300270	PAQR6	chr1:156300270:G:A	G	A	5.43762e-07	-0.794979	0.141122	0.226027	52214	rs12079226
1	156301535	PAQR6	chr1:156301535:C:T	C	T	2.86218e-06	-0.753567	0.145331	0.232877	53479	rs60418539
1	156301535	GLMP	chr1:156301535:C:T	C	T	1.03806e-11	-0.896702	0.105978	0.232877	5856	rs60418539
1	156302480	GLMP	chr1:156302480:C:T	C	T	3.22234e-07	-0.572183	0.0991217	0.369863	6801	rs949464
1	156303270	GLMP	chr1:156303270:C:T	C	T	1.51572e-05	-0.532653	0.112773	0.328767	7591	rs11264467
1	156304352	GLMP	chr1:156304352:G:A	G	A	7.1723e-13	-0.926272	0.101099	0.226027	8673	rs2010206
1	156304352	PAQR6	chr1:156304352:G:A	G	A	5.43762e-07	-0.794979	0.141122	0.226027	56296	rs2010206
1	156305490	GLMP	chr1:156305490:G:A	G	A	3.22234e-07	-0.572183	0.0991217	0.369863	9811	rs7522860
1	156306425	GLMP	chr1:156306425:C:T	C	T	7.1723e-13	-0.926272	0.101099	0.226027	10746	rs6696400
1	156306425	PAQR6	chr1:156306425:C:T	C	T	5.43762e-07	-0.794979	0.141122	0.226027	58369	rs6696400
1	156317612	GLMP	chr1:156317612:T:C	T	C	3.22234e-07	-0.572183	0.0991217	0.369863	21933	rs2296374
1	156322507	GLMP	chr1:156322507:A:T	A	T	7.1723e-13	-0.926272	0.101099	0.226027	26828	rs34398272
1	156322507	PAQR6	chr1:156322507:A:T	A	T	5.43762e-07	-0.794979	0.141122	0.226027	74451	rs34398272
1	156322575	GLMP	chr1:156322575:A:G	A	G	3.22234e-07	-0.572183	0.0991217	0.369863	26896	rs11264472
1	156323264	GLMP	chr1:156323264:CCATT:C	CCATT	C	1.0694e-07	-0.58779	0.0969339	0.363014	27585	rs755624161
1	156323264	GLMP	chr1:156323264:CCATT:C	CCATT	C	1.0694e-07	-0.58779	0.0969339	0.363014	27585	rs398053427
1	156323264	GLMP	chr1:156323264:CCATT:C	CCATT	C	1.0694e-07	-0.58779	0.0969339	0.363014	27585	rs10542877
1	156324106	PAQR6	chr1:156324106:C:T	C	T	5.43762e-07	-0.794979	0.141122	0.226027	76050	rs6672860
1	156324106	GLMP	chr1:156324106:C:T	C	T	7.1723e-13	-0.926272	0.101099	0.226027	28427	rs6672860
1	156325662	PAQR6	chr1:156325662:C:T	C	T	1.77204e-06	-0.798211	0.150164	0.212329	77606	rs61814799
1	156325662	GLMP	chr1:156325662:C:T	C	T	9.7151e-11	-0.903581	0.11466	0.212329	29983	rs61814799
1	156330319	PAQR6	chr1:156330319:T:C	T	C	5.43762e-07	-0.794979	0.141122	0.226027	82263	rs7543925
1	156330319	GLMP	chr1:156330319:T:C	T	C	7.1723e-13	-0.926272	0.101099	0.226027	34640	rs7543925
1	156334991	GLMP	chr1:156334991:A:G	A	G	3.22234e-07	-0.572183	0.0991217	0.369863	39312	rs3762281
1	156335371	PAQR6	chr1:156335371:C:T	C	T	2.86218e-06	-0.753567	0.145331	0.232877	87315	rs35478936
1	156335371	GLMP	chr1:156335371:C:T	C	T	1.03806e-11	-0.896702	0.105978	0.232877	39692	rs35478936
1	156343491	PAQR6	chr1:156343491:A:T	A	T	3.65673e-07	-0.807273	0.140666	0.205479	95435	rs61814809
1	156343491	GLMP	chr1:156343491:A:T	A	T	1.19178e-11	-0.896597	0.106419	0.205479	47812	rs61814809
1	156344313	GLMP	chr1:156344313:T:C	T	C	3.28375e-07	-0.573602	0.0994539	0.342466	48634	rs2025577
1	156344836	GLMP	chr1:156344836:A:G	A	G	9.75925e-07	-0.556003	0.101523	0.349315	49157	rs2274226
1	156603999	NAXE	chr1:156603999:A:G	A	G	6.89229e-07	-0.805561	0.144628	0.10274	12223	rs4661205
1	156608539	NAXE	chr1:156608539:C:T	C	T	2.35389e-06	-0.757143	0.144535	0.143836	16763	rs6427324
1	156616399	NAXE	chr1:156616399:G:A	G	A	3.93921e-06	-0.733902	0.143966	0.150685	24623	rs4553183
1	15730070	TMEM82	chr1:15730070:C:T	C	T	1.66999e-08	-1.26499	0.193158	0.0684932	-12429	rs144199058
1	15740972	TMEM82	chr1:15740972:C:T	C	T	4.07248e-07	-1.07728	0.188656	0.0958904	-1527	rs113483112
1	15743169	TMEM82	chr1:15743169:T:C	T	C	3.52036e-06	-1.01176	0.197279	0.0821918	670	rs61740067
1	157698600	ISG20L2	chr1:157698600:T:C	T	C	5.9183e-07	-0.477553	0.0851157	0.287671	969834	rs7522061
1	157699488	ISG20L2	chr1:157699488:C:T	C	T	5.9183e-07	-0.477553	0.0851157	0.287671	970722	rs3761959
1	16065992	FAM131C	chr1:16065992:C:T	C	T	1.68e-08	0.94125	0.143759	0.369863	-7659	rs10803416
1	16066862	FAM131C	chr1:16066862:T:G	T	G	5.083e-06	-0.715684	0.14235	0.486301	-6789	rs9442235
1	16066898	FAM131C	chr1:16066898:T:A	T	A	1.68e-08	0.94125	0.143759	0.369863	-6753	rs11590986
1	16067316	FAM131C	chr1:16067316:T:C	T	C	1.68e-08	0.94125	0.143759	0.369863	-6335	rs10927901
1	16067457	FAM131C	chr1:16067457:G:C	G	C	1.68e-08	0.94125	0.143759	0.369863	-6194	rs10803417
1	16067893	FAM131C	chr1:16067893:C:A	C	A	1.68e-08	0.94125	0.143759	0.369863	-5758	rs10803418
1	16068534	FAM131C	chr1:16068534:G:T	G	T	5.083e-06	-0.715684	0.14235	0.486301	-5117	rs10803419
1	16068652	FAM131C	chr1:16068652:G:A	G	A	1.68e-08	0.94125	0.143759	0.369863	-4999	rs10927902
1	16069095	FAM131C	chr1:16069095:A:G	A	G	1.65401e-06	0.732783	0.137373	0.486301	-4556	rs9442199
1	16071238	FAM131C	chr1:16071238:AG:A	AG	A	3.50808e-06	-0.718833	0.140136	0.369863	-2413	rs113847540
1	16071375	FAM131C	chr1:16071375:T:C	T	C	3.50808e-06	-0.718833	0.140136	0.369863	-2276	rs72887136
1	161027181	TSTD1	chr1:161027181:C:G	C	G	8.43273e-07	-0.69007	0.125107	0.472603	-11783	rs57839241
1	161038782	TSTD1	chr1:161038782:C:A	C	A	5.55076e-07	-0.664475	0.118071	0.479452	-182	rs3766383
1	161042970	TSTD1	chr1:161042970:T:C	T	C	5.55076e-07	-0.664475	0.118071	0.479452	4006	rs2073653
1	161043522	TSTD1	chr1:161043522:T:C	T	C	5.55076e-07	-0.664475	0.118071	0.479452	4558	rs6686076
1	161043813	TSTD1	chr1:161043813:G:A	G	A	5.55076e-07	-0.664475	0.118071	0.479452	4849	rs6427572
1	161043921	TSTD1	chr1:161043921:G:A	G	A	5.55076e-07	-0.664475	0.118071	0.479452	4957	rs6427573
1	161044656	TSTD1	chr1:161044656:C:T	C	T	5.55076e-07	-0.664475	0.118071	0.479452	5692	rs1556260
1	161044859	TSTD1	chr1:161044859:A:G	A	G	5.55076e-07	-0.664475	0.118071	0.479452	5895	rs1556259
1	161050642	TSTD1	chr1:161050642:T:G	T	G	1.19809e-06	-0.635185	0.117163	0.472603	11678	rs58318788
1	161054023	TSTD1	chr1:161054023:G:A	G	A	8.91864e-06	-0.588453	0.120787	0.458904	15059	rs1974140
1	161055335	TSTD1	chr1:161055335:T:C	T	C	1.19809e-06	-0.635185	0.117163	0.472603	16371	rs6660240
1	161056289	TSTD1	chr1:161056289:A:T	A	T	9.72343e-06	-0.572698	0.118138	0.452055	17325	rs7516231
1	161057878	TSTD1	chr1:161057878:A:G	A	G	1.19809e-06	-0.635185	0.117163	0.472603	18914	rs12036299
1	161057974	TSTD1	chr1:161057974:G:A	G	A	1.19809e-06	-0.635185	0.117163	0.472603	19010	rs111847432
1	161058875	TSTD1	chr1:161058875:G:A	G	A	1.19809e-06	-0.635185	0.117163	0.472603	19911	rs12040363
1	161066682	TSTD1	chr1:161066682:G:A	G	A	7.8341e-06	-0.588482	0.119905	0.445205	27718	rs4617422
1	161314434	SDHC	chr1:161314434:A:AGT	A	AGT	1.68585e-05	-0.41049	0.0874648	0.239726	53	rs1451337382
1	161316069	SDHC	chr1:161316069:T:C	T	C	1.68585e-05	-0.41049	0.0874648	0.239726	1688	rs78370127
1	161316565	SDHC	chr1:161316565:G:A	G	A	1.68585e-05	-0.41049	0.0874648	0.239726	2184	rs74956457
1	161316699	SDHC	chr1:161316699:A:C	A	C	1.68585e-05	-0.41049	0.0874648	0.239726	2318	rs16832811
1	161316931	SDHC	chr1:161316931:C:T	C	T	1.68585e-05	-0.41049	0.0874648	0.239726	2550	rs16832813
1	161317012	SDHC	chr1:161317012:G:T	G	T	1.68585e-05	-0.41049	0.0874648	0.239726	2631	rs79820859
1	161317279	SDHC	chr1:161317279:C:T	C	T	1.68585e-05	-0.41049	0.0874648	0.239726	2898	rs75504721
1	161317279	SDHC	chr1:161317279:C:T	C	T	1.68585e-05	-0.41049	0.0874648	0.239726	2898	rs199726354
1	161317359	SDHC	chr1:161317359:T:A	T	A	1.13785e-05	-0.419391	0.0873046	0.232877	2978	rs79322864
1	161317438	SDHC	chr1:161317438:C:A	C	A	1.68585e-05	-0.41049	0.0874648	0.239726	3057	rs78733287
1	161317625	SDHC	chr1:161317625:A:G	A	G	1.68585e-05	-0.41049	0.0874648	0.239726	3244	rs113972205
1	161317690	SDHC	chr1:161317690:C:T	C	T	1.68585e-05	-0.41049	0.0874648	0.239726	3309	rs139576530
1	161317708	SDHC	chr1:161317708:T:C	T	C	1.68585e-05	-0.41049	0.0874648	0.239726	3327	rs144308699
1	161317895	SDHC	chr1:161317895:T:C	T	C	1.68585e-05	-0.41049	0.0874648	0.239726	3514	rs75781067
1	161317939	SDHC	chr1:161317939:T:C	T	C	1.68585e-05	-0.41049	0.0874648	0.239726	3558	rs111751106
1	161318140	SDHC	chr1:161318140:G:C	G	C	1.68585e-05	-0.41049	0.0874648	0.239726	3759	rs75630286
1	161318171	SDHC	chr1:161318171:CA:C	CA	C	3.34498e-06	-0.440659	0.0856883	0.253425	3790	rs201470711
1	161318291	SDHC	chr1:161318291:C:T	C	T	1.68585e-05	-0.41049	0.0874648	0.239726	3910	rs56280055
1	161319765	SDHC	chr1:161319765:A:G	A	G	1.68585e-05	-0.41049	0.0874648	0.239726	5384	rs16832817
1	161319929	SDHC	chr1:161319929:T:TGGCC	T	TGGCC	1.68585e-05	-0.41049	0.0874648	0.239726	5548	rs146094586
1	161320018	SDHC	chr1:161320018:A:G	A	G	1.68585e-05	-0.41049	0.0874648	0.239726	5637	rs16832820
1	161320446	SDHC	chr1:161320446:G:A	G	A	1.68585e-05	-0.41049	0.0874648	0.239726	6065	rs60261157
1	161321067	SDHC	chr1:161321067:T:C	T	C	1.68585e-05	-0.41049	0.0874648	0.239726	6686	rs113116300
1	161321533	SDHC	chr1:161321533:C:T	C	T	1.68585e-05	-0.41049	0.0874648	0.239726	7152	rs16832823
1	161322273	SDHC	chr1:161322273:T:TTAGA	T	TTAGA	1.68585e-05	-0.41049	0.0874648	0.239726	7892	rs148443242
1	161322741	SDHC	chr1:161322741:G:T	G	T	1.68585e-05	-0.41049	0.0874648	0.239726	8360	rs60958200
1	161322741	SDHC	chr1:161322741:G:T	G	T	1.68585e-05	-0.41049	0.0874648	0.239726	8360	rs569112182
1	161322754	SDHC	chr1:161322754:A:T	A	T	1.68585e-05	-0.41049	0.0874648	0.239726	8373	rs56355322
1	161322780	SDHC	chr1:161322780:A:G	A	G	1.68585e-05	-0.41049	0.0874648	0.239726	8399	rs55981028
1	161322881	SDHC	chr1:161322881:G:A	G	A	1.68585e-05	-0.41049	0.0874648	0.239726	8500	rs58758353
1	161322894	SDHC	chr1:161322894:A:C	A	C	1.68585e-05	-0.41049	0.0874648	0.239726	8513	rs16832824
1	161323228	SDHC	chr1:161323228:G:A	G	A	1.68585e-05	-0.41049	0.0874648	0.239726	8847	rs4548462
1	161323233	SDHC	chr1:161323233:T:G	T	G	1.68585e-05	-0.41049	0.0874648	0.239726	8852	rs4272643
1	161323242	SDHC	chr1:161323242:T:C	T	C	1.68585e-05	-0.41049	0.0874648	0.239726	8861	rs4272644
1	161323403	SDHC	chr1:161323403:C:T	C	T	1.68585e-05	-0.41049	0.0874648	0.239726	9022	rs4255402
1	161323425	SDHC	chr1:161323425:A:G	A	G	1.68585e-05	-0.41049	0.0874648	0.239726	9044	rs4622080
1	161323856	SDHC	chr1:161323856:T:C	T	C	1.68585e-05	-0.41049	0.0874648	0.239726	9475	rs113273303
1	161323918	SDHC	chr1:161323918:G:A	G	A	1.68585e-05	-0.41049	0.0874648	0.239726	9537	rs55682614
1	161324014	SDHC	chr1:161324014:T:C	T	C	1.68585e-05	-0.41049	0.0874648	0.239726	9633	rs55747162
1	161324098	SDHC	chr1:161324098:T:G	T	G	1.68585e-05	-0.41049	0.0874648	0.239726	9717	rs16832826
1	161324189	SDHC	chr1:161324189:A:G	A	G	1.68585e-05	-0.41049	0.0874648	0.239726	9808	rs55961103
1	161324386	SDHC	chr1:161324386:T:C	T	C	1.68585e-05	-0.41049	0.0874648	0.239726	10005	rs56411570
1	161324675	SDHC	chr1:161324675:G:A	G	A	1.68585e-05	-0.41049	0.0874648	0.239726	10294	rs61618989
1	161324808	SDHC	chr1:161324808:A:G	A	G	1.68585e-05	-0.41049	0.0874648	0.239726	10427	rs77341632
1	161325147	SDHC	chr1:161325147:T:C	T	C	1.68585e-05	-0.41049	0.0874648	0.239726	10766	rs10159083
1	161325455	SDHC	chr1:161325455:G:A	G	A	1.68585e-05	-0.41049	0.0874648	0.239726	11074	rs55955603
1	161326505	SDHC	chr1:161326505:A:G	A	G	1.68585e-05	-0.41049	0.0874648	0.239726	12124	rs111818479
1	161326733	SDHC	chr1:161326733:A:C	A	C	1.68585e-05	-0.41049	0.0874648	0.239726	12352	rs112114322
1	161327016	SDHC	chr1:161327016:C:G	C	G	1.68585e-05	-0.41049	0.0874648	0.239726	12635	rs75003425
1	161327444	SDHC	chr1:161327444:T:G	T	G	1.68585e-05	-0.41049	0.0874648	0.239726	13063	rs74127622
1	161327563	SDHC	chr1:161327563:A:T	A	T	1.13785e-05	-0.419391	0.0873046	0.232877	13182	rs74884887
1	161327564	SDHC	chr1:161327564:T:A	T	A	1.68585e-05	-0.41049	0.0874648	0.239726	13183	rs79290777
1	161327764	SDHC	chr1:161327764:G:A	G	A	1.68585e-05	-0.41049	0.0874648	0.239726	13383	rs76022526
1	161329253	SDHC	chr1:161329253:G:T	G	T	1.68585e-05	-0.41049	0.0874648	0.239726	14872	rs60792683
1	161330091	SDHC	chr1:161330091:G:A	G	A	1.68585e-05	-0.41049	0.0874648	0.239726	15710	rs60078979
1	161330860	SDHC	chr1:161330860:T:G	T	G	1.68585e-05	-0.41049	0.0874648	0.239726	16479	rs77237059
1	161331454	SDHC	chr1:161331454:C:G	C	G	1.68585e-05	-0.41049	0.0874648	0.239726	17073	rs13376158
1	161331700	SDHC	chr1:161331700:G:A	G	A	1.68585e-05	-0.41049	0.0874648	0.239726	17319	rs13375385
1	161333301	SDHC	chr1:161333301:T:C	T	C	1.68585e-05	-0.41049	0.0874648	0.239726	18920	rs80041327
1	161333508	SDHC	chr1:161333508:G:A	G	A	1.68585e-05	-0.41049	0.0874648	0.239726	19127	rs74794560
1	161333526	SDHC	chr1:161333526:C:G	C	G	1.68585e-05	-0.41049	0.0874648	0.239726	19145	rs76603937
1	161334661	SDHC	chr1:161334661:G:A	G	A	1.68585e-05	-0.41049	0.0874648	0.239726	20280	rs75938678
1	161335524	SDHC	chr1:161335524:G:A	G	A	1.68585e-05	-0.41049	0.0874648	0.239726	21143	rs74127629
1	161335779	SDHC	chr1:161335779:C:T	C	T	1.68585e-05	-0.41049	0.0874648	0.239726	21398	rs74127630
1	161336449	SDHC	chr1:161336449:G:A	G	A	1.68585e-05	-0.41049	0.0874648	0.239726	22068	rs113493294
1	161336746	SDHC	chr1:161336746:G:T	G	T	1.68585e-05	-0.41049	0.0874648	0.239726	22365	rs74127635
1	161336767	SDHC	chr1:161336767:G:C	G	C	1.68585e-05	-0.41049	0.0874648	0.239726	22386	rs74127636
1	161336950	SDHC	chr1:161336950:A:G	A	G	1.68585e-05	-0.41049	0.0874648	0.239726	22569	rs78794031
1	161337375	SDHC	chr1:161337375:A:T	A	T	1.68585e-05	-0.41049	0.0874648	0.239726	22994	rs57306652
1	161337400	SDHC	chr1:161337400:T:G	T	G	1.68585e-05	-0.41049	0.0874648	0.239726	23019	rs55809622
1	161337933	SDHC	chr1:161337933:A:T	A	T	1.68585e-05	-0.41049	0.0874648	0.239726	23552	rs4463689
1	161338117	SDHC	chr1:161338117:T:C	T	C	1.68585e-05	-0.41049	0.0874648	0.239726	23736	rs7412460
1	161338287	SDHC	chr1:161338287:T:C	T	C	1.68585e-05	-0.41049	0.0874648	0.239726	23906	rs74127638
1	161338333	SDHC	chr1:161338333:A:G	A	G	1.68585e-05	-0.41049	0.0874648	0.239726	23952	rs74127639
1	161338367	SDHC	chr1:161338367:T:C	T	C	1.68585e-05	-0.41049	0.0874648	0.239726	23986	rs59559479
1	161338734	SDHC	chr1:161338734:C:T	C	T	1.68585e-05	-0.41049	0.0874648	0.239726	24353	rs74127641
1	161338959	SDHC	chr1:161338959:C:T	C	T	1.68585e-05	-0.41049	0.0874648	0.239726	24578	rs59747425
1	161339139	SDHC	chr1:161339139:T:C	T	C	1.68585e-05	-0.41049	0.0874648	0.239726	24758	rs58842513
1	161339383	SDHC	chr1:161339383:A:G	A	G	1.68585e-05	-0.41049	0.0874648	0.239726	25002	rs56868836
1	161339402	SDHC	chr1:161339402:C:T	C	T	1.68585e-05	-0.41049	0.0874648	0.239726	25021	rs59774375
1	161340145	SDHC	chr1:161340145:C:T	C	T	1.68585e-05	-0.41049	0.0874648	0.239726	25764	rs79823281
1	161340281	SDHC	chr1:161340281:C:T	C	T	1.68585e-05	-0.41049	0.0874648	0.239726	25900	rs75135629
1	161340729	SDHC	chr1:161340729:C:T	C	T	1.68585e-05	-0.41049	0.0874648	0.239726	26348	rs9970904
1	161341852	SDHC	chr1:161341852:G:A	G	A	1.68585e-05	-0.41049	0.0874648	0.239726	27471	rs16832835
1	161342217	SDHC	chr1:161342217:C:T	C	T	1.68585e-05	-0.41049	0.0874648	0.239726	27836	rs9330294
1	161343462	SDHC	chr1:161343462:T:C	T	C	1.68585e-05	-0.41049	0.0874648	0.239726	29081	rs16832842
1	161343862	SDHC	chr1:161343862:T:A	T	A	3.36506e-06	-0.418255	0.0813576	0.253425	29481	rs16832846
1	161344077	SDHC	chr1:161344077:C:CAGG	C	CAGG	1.68585e-05	-0.41049	0.0874648	0.239726	29696	rs199924448
1	161344077	SDHC	chr1:161344077:C:CAGG	C	CAGG	1.68585e-05	-0.41049	0.0874648	0.239726	29696	rs57096966
1	161344244	SDHC	chr1:161344244:T:C	T	C	1.68585e-05	-0.41049	0.0874648	0.239726	29863	rs4077289
1	161344632	SDHC	chr1:161344632:G:A	G	A	1.68585e-05	-0.41049	0.0874648	0.239726	30251	rs4077290
1	161345511	SDHC	chr1:161345511:T:C	T	C	1.68585e-05	-0.41049	0.0874648	0.239726	31130	rs4525064
1	161345829	SDHC	chr1:161345829:G:A	G	A	1.68585e-05	-0.41049	0.0874648	0.239726	31448	rs112714776
1	161346467	SDHC	chr1:161346467:T:A	T	A	1.68585e-05	-0.41049	0.0874648	0.239726	32086	rs74349299
1	161346490	SDHC	chr1:161346490:C:G	C	G	1.68585e-05	-0.41049	0.0874648	0.239726	32109	rs112828491
1	161346688	SDHC	chr1:161346688:A:G	A	G	1.68585e-05	-0.41049	0.0874648	0.239726	32307	rs56007456
1	161346925	SDHC	chr1:161346925:G:A	G	A	1.68585e-05	-0.41049	0.0874648	0.239726	32544	rs57421557
1	161348800	SDHC	chr1:161348800:T:A	T	A	1.68585e-05	-0.41049	0.0874648	0.239726	34419	rs75692182
1	161351777	SDHC	chr1:161351777:A:G	A	G	1.68585e-05	-0.41049	0.0874648	0.239726	37396	rs4481873
1	161351964	SDHC	chr1:161351964:C:T	C	T	1.68585e-05	-0.41049	0.0874648	0.239726	37583	rs61461118
1	161352333	SDHC	chr1:161352333:C:T	C	T	1.68585e-05	-0.41049	0.0874648	0.239726	37952	rs57473118
1	161352728	SDHC	chr1:161352728:T:C	T	C	1.68585e-05	-0.41049	0.0874648	0.239726	38347	rs76055913
1	161352790	SDHC	chr1:161352790:T:C	T	C	1.68585e-05	-0.41049	0.0874648	0.239726	38409	rs59191996
1	161352833	SDHC	chr1:161352833:C:T	C	T	1.68585e-05	-0.41049	0.0874648	0.239726	38452	rs58418155
1	161353381	SDHC	chr1:161353381:C:T	C	T	1.68585e-05	-0.41049	0.0874648	0.239726	39000	rs74127657
1	161353490	SDHC	chr1:161353490:T:G	T	G	1.68585e-05	-0.41049	0.0874648	0.239726	39109	rs60405593
1	161354088	SDHC	chr1:161354088:T:C	T	C	1.68585e-05	-0.41049	0.0874648	0.239726	39707	rs55698724
1	161354875	SDHC	chr1:161354875:C:A	C	A	2.58781e-06	-0.446381	0.0856337	0.232877	40494	rs56028608
1	161355082	SDHC	chr1:161355082:C:T	C	T	1.68585e-05	-0.41049	0.0874648	0.239726	40701	rs61653684
1	161355098	SDHC	chr1:161355098:G:A	G	A	1.68585e-05	-0.41049	0.0874648	0.239726	40717	rs57841279
1	161355700	SDHC	chr1:161355700:A:T	A	T	1.68585e-05	-0.41049	0.0874648	0.239726	41319	rs56290916
1	161356484	SDHC	chr1:161356484:A:G	A	G	1.68585e-05	-0.41049	0.0874648	0.239726	42103	rs80246038
1	161357093	SDHC	chr1:161357093:G:GTTAA	G	GTTAA	1.68585e-05	-0.41049	0.0874648	0.239726	42712	rs61234630
1	161357093	SDHC	chr1:161357093:G:GTTAA	G	GTTAA	1.68585e-05	-0.41049	0.0874648	0.239726	42712	rs146629370
1	161357139	SDHC	chr1:161357139:C:G	C	G	1.68585e-05	-0.41049	0.0874648	0.239726	42758	rs61308286
1	161357150	SDHC	chr1:161357150:C:T	C	T	1.68585e-05	-0.41049	0.0874648	0.239726	42769	rs61447446
1	161357515	SDHC	chr1:161357515:C:T	C	T	1.68585e-05	-0.41049	0.0874648	0.239726	43134	rs58874147
1	161357556	SDHC	chr1:161357556:C:T	C	T	1.68585e-05	-0.41049	0.0874648	0.239726	43175	rs60435895
1	161357560	SDHC	chr1:161357560:CG:C	CG	C	1.68585e-05	-0.41049	0.0874648	0.239726	43179	rs796386929
1	161357560	SDHC	chr1:161357560:CG:C	CG	C	1.68585e-05	-0.41049	0.0874648	0.239726	43179	rs58068914
1	161357588	SDHC	chr1:161357588:A:G	A	G	1.68585e-05	-0.41049	0.0874648	0.239726	43207	rs60799370
1	161357737	SDHC	chr1:161357737:C:T	C	T	1.68585e-05	-0.41049	0.0874648	0.239726	43356	rs74127658
1	161358080	SDHC	chr1:161358080:A:G	A	G	1.68585e-05	-0.41049	0.0874648	0.239726	43699	rs76703105
1	161358110	SDHC	chr1:161358110:C:T	C	T	1.68585e-05	-0.41049	0.0874648	0.239726	43729	rs4631719
1	161358233	SDHC	chr1:161358233:A:T	A	T	1.68585e-05	-0.41049	0.0874648	0.239726	43852	rs4477296
1	161358350	SDHC	chr1:161358350:C:G	C	G	1.68585e-05	-0.41049	0.0874648	0.239726	43969	rs4634926
1	161358389	SDHC	chr1:161358389:G:A	G	A	1.68585e-05	-0.41049	0.0874648	0.239726	44008	rs4469725
1	161358561	SDHC	chr1:161358561:T:C	T	C	1.68585e-05	-0.41049	0.0874648	0.239726	44180	rs80312901
1	161358626	SDHC	chr1:161358626:C:A	C	A	1.68585e-05	-0.41049	0.0874648	0.239726	44245	rs113563654
1	161358838	SDHC	chr1:161358838:C:A	C	A	1.68585e-05	-0.41049	0.0874648	0.239726	44457	rs61304797
1	161359345	SDHC	chr1:161359345:T:G	T	G	1.68585e-05	-0.41049	0.0874648	0.239726	44964	rs60882053
1	161359416	SDHC	chr1:161359416:T:C	T	C	1.68585e-05	-0.41049	0.0874648	0.239726	45035	rs16832851
1	161359611	SDHC	chr1:161359611:G:A	G	A	1.68585e-05	-0.41049	0.0874648	0.239726	45230	rs4474277
1	161359684	SDHC	chr1:161359684:G:A	G	A	1.68585e-05	-0.41049	0.0874648	0.239726	45303	rs4319356
1	161360451	SDHC	chr1:161360451:G:C	G	C	1.68585e-05	-0.41049	0.0874648	0.239726	46070	rs55898518
1	161360583	SDHC	chr1:161360583:T:C	T	C	1.68585e-05	-0.41049	0.0874648	0.239726	46202	rs59037769
1	161360629	SDHC	chr1:161360629:T:C	T	C	1.68585e-05	-0.41049	0.0874648	0.239726	46248	rs55783815
1	161360740	SDHC	chr1:161360740:A:T	A	T	1.68585e-05	-0.41049	0.0874648	0.239726	46359	rs60179510
1	161360918	SDHC	chr1:161360918:T:G	T	G	1.68585e-05	-0.41049	0.0874648	0.239726	46537	rs56071922
1	161361104	SDHC	chr1:161361104:C:T	C	T	1.68585e-05	-0.41049	0.0874648	0.239726	46723	rs74963273
1	161361137	SDHC	chr1:161361137:A:G	A	G	1.68585e-05	-0.41049	0.0874648	0.239726	46756	rs112395017
1	161361209	SDHC	chr1:161361209:G:A	G	A	1.68585e-05	-0.41049	0.0874648	0.239726	46828	rs78969943
1	161361420	SDHC	chr1:161361420:G:A	G	A	1.68585e-05	-0.41049	0.0874648	0.239726	47039	rs16832854
1	161362818	SDHC	chr1:161362818:G:A	G	A	1.68585e-05	-0.41049	0.0874648	0.239726	48437	rs8266
1	161363401	SDHC	chr1:161363401:A:G	A	G	1.68585e-05	-0.41049	0.0874648	0.239726	49020	rs4600063
1	161363768	SDHC	chr1:161363768:A:G	A	G	1.68585e-05	-0.41049	0.0874648	0.239726	49387	rs3935401
1	161364485	SDHC	chr1:161364485:C:G	C	G	1.68585e-05	-0.41049	0.0874648	0.239726	50104	rs12239492
1	161364836	SDHC	chr1:161364836:G:C	G	C	1.68585e-05	-0.41049	0.0874648	0.239726	50455	rs1133806
1	161364945	SDHC	chr1:161364945:G:A	G	A	1.68585e-05	-0.41049	0.0874648	0.239726	50564	rs16832869
1	161365491	SDHC	chr1:161365491:T:A	T	A	1.68585e-05	-0.41049	0.0874648	0.239726	51110	rs13374037
1	161365968	SDHC	chr1:161365968:G:A	G	A	1.68585e-05	-0.41049	0.0874648	0.239726	51587	rs16832871
1	161366165	SDHC	chr1:161366165:A:C	A	C	1.68585e-05	-0.41049	0.0874648	0.239726	51784	rs16832874
1	161366901	SDHC	chr1:161366901:G:T	G	T	1.68585e-05	-0.41049	0.0874648	0.239726	52520	rs59690240
1	161367012	SDHC	chr1:161367012:C:T	C	T	1.68585e-05	-0.41049	0.0874648	0.239726	52631	rs34872203
1	161367231	SDHC	chr1:161367231:T:C	T	C	1.68585e-05	-0.41049	0.0874648	0.239726	52850	rs4360541
1	161367248	SDHC	chr1:161367248:G:C	G	C	1.68585e-05	-0.41049	0.0874648	0.239726	52867	rs4585997
1	161367667	SDHC	chr1:161367667:A:C	A	C	1.68585e-05	-0.41049	0.0874648	0.239726	53286	rs10494350
1	161367719	SDHC	chr1:161367719:A:G	A	G	1.68585e-05	-0.41049	0.0874648	0.239726	53338	rs10494351
1	161367814	SDHC	chr1:161367814:G:A	G	A	1.68585e-05	-0.41049	0.0874648	0.239726	53433	rs41270861
1	161368670	SDHC	chr1:161368670:A:G	A	G	1.68585e-05	-0.41049	0.0874648	0.239726	54289	rs16832884
1	161368794	SDHC	chr1:161368794:T:C	T	C	1.68585e-05	-0.41049	0.0874648	0.239726	54413	rs59840298
1	161369122	SDHC	chr1:161369122:C:T	C	T	1.68585e-05	-0.41049	0.0874648	0.239726	54741	rs59544428
1	161369154	SDHC	chr1:161369154:C:T	C	T	1.68585e-05	-0.41049	0.0874648	0.239726	54773	rs61576374
1	161369455	SDHC	chr1:161369455:C:CT	C	CT	1.68585e-05	-0.41049	0.0874648	0.239726	55074	rs151337443
1	161369600	SDHC	chr1:161369600:A:G	A	G	1.68585e-05	-0.41049	0.0874648	0.239726	55219	rs10494353
1	161370178	SDHC	chr1:161370178:G:A	G	A	1.68585e-05	-0.41049	0.0874648	0.239726	55797	rs58138146
1	161370264	SDHC	chr1:161370264:G:C	G	C	1.68585e-05	-0.41049	0.0874648	0.239726	55883	rs55929617
1	161370309	SDHC	chr1:161370309:G:A	G	A	1.68585e-05	-0.41049	0.0874648	0.239726	55928	rs61181161
1	161370744	SDHC	chr1:161370744:G:A	G	A	1.68585e-05	-0.41049	0.0874648	0.239726	56363	rs16832887
1	161371105	SDHC	chr1:161371105:G:A	G	A	1.68585e-05	-0.41049	0.0874648	0.239726	56724	rs59340690
1	161371638	SDHC	chr1:161371638:A:G	A	G	1.68585e-05	-0.41049	0.0874648	0.239726	57257	rs55729989
1	161371773	SDHC	chr1:161371773:G:A	G	A	1.68585e-05	-0.41049	0.0874648	0.239726	57392	rs10494354
1	161372031	SDHC	chr1:161372031:C:T	C	T	1.68585e-05	-0.41049	0.0874648	0.239726	57650	rs16832892
1	161372206	SDHC	chr1:161372206:T:A	T	A	1.68585e-05	-0.41049	0.0874648	0.239726	57825	rs78471524
1	161372706	SDHC	chr1:161372706:G:C	G	C	1.68585e-05	-0.41049	0.0874648	0.239726	58325	rs79606963
1	161372775	SDHC	chr1:161372775:G:A	G	A	1.68585e-05	-0.41049	0.0874648	0.239726	58394	rs113658817
1	161373034	SDHC	chr1:161373034:C:A	C	A	1.68585e-05	-0.41049	0.0874648	0.239726	58653	rs78551523
1	161373592	SDHC	chr1:161373592:A:G	A	G	1.68585e-05	-0.41049	0.0874648	0.239726	59211	rs16832894
1	161373715	SDHC	chr1:161373715:G:T	G	T	1.68585e-05	-0.41049	0.0874648	0.239726	59334	rs16832897
1	161373972	SDHC	chr1:161373972:C:T	C	T	1.68585e-05	-0.41049	0.0874648	0.239726	59591	rs57154376
1	161374465	SDHC	chr1:161374465:G:T	G	T	1.68585e-05	-0.41049	0.0874648	0.239726	60084	rs16832900
1	161374805	SDHC	chr1:161374805:C:T	C	T	1.68585e-05	-0.41049	0.0874648	0.239726	60424	rs55807618
1	161374951	SDHC	chr1:161374951:A:G	A	G	1.68585e-05	-0.41049	0.0874648	0.239726	60570	rs57858140
1	161375440	SDHC	chr1:161375440:T:C	T	C	1.68585e-05	-0.41049	0.0874648	0.239726	61059	rs79805434
1	161375448	SDHC	chr1:161375448:G:A	G	A	1.68585e-05	-0.41049	0.0874648	0.239726	61067	rs76052669
1	161375639	SDHC	chr1:161375639:C:T	C	T	1.68585e-05	-0.41049	0.0874648	0.239726	61258	rs57270150
1	161375728	SDHC	chr1:161375728:A:G	A	G	1.68585e-05	-0.41049	0.0874648	0.239726	61347	rs57007882
1	161376568	SDHC	chr1:161376568:G:A	G	A	1.68585e-05	-0.41049	0.0874648	0.239726	62187	rs16832902
1	161378573	SDHC	chr1:161378573:C:T	C	T	1.68585e-05	-0.41049	0.0874648	0.239726	64192	rs12385733
1	161378638	SDHC	chr1:161378638:G:A	G	A	1.68585e-05	-0.41049	0.0874648	0.239726	64257	rs12385723
1	161379202	SDHC	chr1:161379202:T:C	T	C	1.68585e-05	-0.41049	0.0874648	0.239726	64821	rs4534404
1	161379236	SDHC	chr1:161379236:T:C	T	C	1.68585e-05	-0.41049	0.0874648	0.239726	64855	rs4534405
1	161379605	SDHC	chr1:161379605:C:CA	C	CA	1.68585e-05	-0.41049	0.0874648	0.239726	65224	rs148283677
1	161379614	SDHC	chr1:161379614:C:T	C	T	1.68585e-05	-0.41049	0.0874648	0.239726	65233	rs10158388
1	161380544	SDHC	chr1:161380544:T:A	T	A	1.68585e-05	-0.41049	0.0874648	0.239726	66163	rs74327337
1	161380602	SDHC	chr1:161380602:T:G	T	G	1.68585e-05	-0.41049	0.0874648	0.239726	66221	rs112748785
1	161381258	SDHC	chr1:161381258:C:T	C	T	1.68585e-05	-0.41049	0.0874648	0.239726	66877	rs77870977
1	161381410	SDHC	chr1:161381410:A:G	A	G	1.68585e-05	-0.41049	0.0874648	0.239726	67029	rs112224500
1	161381689	SDHC	chr1:161381689:T:A	T	A	1.68585e-05	-0.41049	0.0874648	0.239726	67308	rs77102497
1	161381753	SDHC	chr1:161381753:A:G	A	G	1.68585e-05	-0.41049	0.0874648	0.239726	67372	rs55674249
1	161381825	SDHC	chr1:161381825:C:CA	C	CA	1.68585e-05	-0.41049	0.0874648	0.239726	67444	rs56268684
1	161381825	SDHC	chr1:161381825:C:CA	C	CA	1.68585e-05	-0.41049	0.0874648	0.239726	67444	rs397936015
1	161384358	SDHC	chr1:161384358:C:T	C	T	1.68585e-05	-0.41049	0.0874648	0.239726	69977	rs55996762
1	161384590	SDHC	chr1:161384590:C:T	C	T	1.68585e-05	-0.41049	0.0874648	0.239726	70209	rs56169917
1	161385702	SDHC	chr1:161385702:C:T	C	T	1.68585e-05	-0.41049	0.0874648	0.239726	71321	rs78848507
1	161385990	SDHC	chr1:161385990:A:T	A	T	1.68585e-05	-0.41049	0.0874648	0.239726	71609	rs188516395
1	161386201	SDHC	chr1:161386201:T:C	T	C	7.39239e-06	-0.448327	0.0910491	0.226027	71820	rs75290407
1	161386260	SDHC	chr1:161386260:T:C	T	C	1.68585e-05	-0.41049	0.0874648	0.239726	71879	rs78104342
1	161387288	SDHC	chr1:161387288:AT:A	AT	A	1.68585e-05	-0.41049	0.0874648	0.239726	72907	rs142348399
1	161387302	SDHC	chr1:161387302:C:T	C	T	1.68585e-05	-0.41049	0.0874648	0.239726	72921	rs76781011
1	161387329	SDHC	chr1:161387329:T:A	T	A	1.68585e-05	-0.41049	0.0874648	0.239726	72948	rs74124931
1	161388160	SDHC	chr1:161388160:G:A	G	A	1.68585e-05	-0.41049	0.0874648	0.239726	73779	rs77250597
1	161388249	SDHC	chr1:161388249:C:T	C	T	1.68585e-05	-0.41049	0.0874648	0.239726	73868	rs113573187
1	161388350	SDHC	chr1:161388350:G:A	G	A	1.68585e-05	-0.41049	0.0874648	0.239726	73969	rs371958029
1	161389252	SDHC	chr1:161389252:T:C	T	C	1.68585e-05	-0.41049	0.0874648	0.239726	74871	rs111285412
1	161390645	SDHC	chr1:161390645:C:T	C	T	1.68585e-05	-0.41049	0.0874648	0.239726	76264	rs4077631
1	161390733	SDHC	chr1:161390733:CAGCA:C	CAGCA	C	1.68585e-05	-0.41049	0.0874648	0.239726	76352	rs796668250
1	161390733	SDHC	chr1:161390733:CAGCA:C	CAGCA	C	1.68585e-05	-0.41049	0.0874648	0.239726	76352	rs5778208
1	161394261	SDHC	chr1:161394261:C:T	C	T	1.68585e-05	-0.41049	0.0874648	0.239726	79880	rs56122953
1	161395517	SDHC	chr1:161395517:T:A	T	A	1.68585e-05	-0.41049	0.0874648	0.239726	81136	rs61299084
1	161397479	SDHC	chr1:161397479:T:G	T	G	1.68585e-05	-0.41049	0.0874648	0.239726	83098	rs78139260
1	161398980	SDHC	chr1:161398980:G:C	G	C	1.68585e-05	-0.41049	0.0874648	0.239726	84599	rs58840032
1	161399040	SDHC	chr1:161399040:G:A	G	A	1.68585e-05	-0.41049	0.0874648	0.239726	84659	rs61608953
1	161399647	SDHC	chr1:161399647:C:T	C	T	9.90316e-06	-0.423499	0.0874528	0.232877	85266	rs74124933
1	161399689	SDHC	chr1:161399689:G:A	G	A	9.90316e-06	-0.423499	0.0874528	0.232877	85308	rs16832948
1	161400877	SDHC	chr1:161400877:C:T	C	T	7.28205e-06	-0.427002	0.0866447	0.226027	86496	rs111984755
1	161402115	SDHC	chr1:161402115:T:C	T	C	7.28205e-06	-0.427002	0.0866447	0.226027	87734	rs56291729
1	161402248	SDHC	chr1:161402248:A:G	A	G	7.28205e-06	-0.427002	0.0866447	0.226027	87867	rs10494355
1	161403064	SDHC	chr1:161403064:C:T	C	T	7.28205e-06	-0.427002	0.0866447	0.226027	88683	rs111320390
1	161403154	SDHC	chr1:161403154:G:T	G	T	7.28205e-06	-0.427002	0.0866447	0.226027	88773	rs10157457
1	161403852	SDHC	chr1:161403852:C:G	C	G	7.28205e-06	-0.427002	0.0866447	0.226027	89471	rs61410886
1	161405384	SDHC	chr1:161405384:G:A	G	A	7.28205e-06	-0.427002	0.0866447	0.226027	91003	rs10157990
1	161405423	SDHC	chr1:161405423:G:A	G	A	7.28205e-06	-0.427002	0.0866447	0.226027	91042	rs10157991
1	161405835	SDHC	chr1:161405835:C:A	C	A	5.93822e-06	-0.460381	0.0923588	0.191781	91454	rs112705999
1	161406767	SDHC	chr1:161406767:A:T	A	T	5.93822e-06	-0.460381	0.0923588	0.191781	92386	rs61734585
1	161407528	SDHC	chr1:161407528:C:CT	C	CT	5.93822e-06	-0.460381	0.0923588	0.191781	93147	rs143715859
1	161408422	SDHC	chr1:161408422:G:A	G	A	5.93822e-06	-0.460381	0.0923588	0.191781	94041	rs111961191
1	161411515	SDHC	chr1:161411515:C:T	C	T	5.93822e-06	-0.460381	0.0923588	0.191781	97134	rs79175210
1	161411946	SDHC	chr1:161411946:A:G	A	G	5.93822e-06	-0.460381	0.0923588	0.191781	97565	rs28742974
1	16191167	ARHGEF19	chr1:16191167:T:C	T	C	4.88913e-12	0.986093	0.113897	0.267123	-21485	rs12734223
1	16197272	ARHGEF19	chr1:16197272:C:G	C	G	4.88913e-12	0.986093	0.113897	0.267123	-15380	rs221029
1	16199699	ARHGEF19	chr1:16199699:G:C	G	C	7.96224e-10	0.815778	0.11119	0.472603	-12953	rs11260936
1	16200034	ARHGEF19	chr1:16200034:G:A	G	A	1.95408e-14	1.04128	0.102841	0.280822	-12618	rs221035
1	16203554	ARHGEF19	chr1:16203554:C:T	C	T	2.7503e-14	1.07789	0.107438	0.273973	-9098	rs221045
1	16203869	ARHGEF19	chr1:16203869:G:A	G	A	1.68974e-12	1.02761	0.114994	0.267123	-8783	rs221047
1	16206527	ARHGEF19	chr1:16206527:C:T	C	T	2.7503e-14	1.07789	0.107438	0.273973	-6125	rs221052
1	16207335	ARHGEF19	chr1:16207335:AATTC:A	AATTC	A	2.7503e-14	1.07789	0.107438	0.273973	-5317	rs3832000
1	16207335	ARHGEF19	chr1:16207335:AATTC:A	AATTC	A	2.7503e-14	1.07789	0.107438	0.273973	-5317	rs397840700
1	16207335	ARHGEF19	chr1:16207335:AATTC:A	AATTC	A	2.7503e-14	1.07789	0.107438	0.273973	-5317	rs71574166
1	16207335	ARHGEF19	chr1:16207335:AATTC:A	AATTC	A	2.7503e-14	1.07789	0.107438	0.273973	-5317	rs149715516
1	16209309	ARHGEF19	chr1:16209309:G:C	G	C	1.43933e-12	1.04971	0.116914	0.280822	-3343	rs221061
1	16210794	ARHGEF19	chr1:16210794:T:G	T	G	1.43933e-12	1.04971	0.116914	0.280822	-1858	rs221063
1	16211286	ARHGEF19	chr1:16211286:CTT:C	CTT	C	1.43933e-12	1.04971	0.116914	0.280822	-1366	rs796554668
1	16211286	ARHGEF19	chr1:16211286:CTT:C	CTT	C	1.43933e-12	1.04971	0.116914	0.280822	-1366	rs3030196
1	16213318	ARHGEF19	chr1:16213318:C:T	C	T	5.45778e-11	0.99489	0.123898	0.273973	666	rs12728772
1	16215281	ARHGEF19	chr1:16215281:C:T	C	T	2.67143e-07	0.878341	0.150859	0.226027	2629	rs72636568
1	16217887	ARHGEF19	chr1:16217887:G:T	G	T	2.67143e-07	0.878341	0.150859	0.226027	5235	rs12740149
1	16222799	ARHGEF19	chr1:16222799:G:C	G	C	4.1933e-06	0.833965	0.164147	0.226027	10147	rs12738408
1	16228610	ARHGEF19	chr1:16228610:C:T	C	T	4.1933e-06	0.833965	0.164147	0.226027	15958	rs41269189
1	16229387	ARHGEF19	chr1:16229387:C:T	C	T	4.1933e-06	0.833965	0.164147	0.226027	16735	rs12748676
1	16230291	ARHGEF19	chr1:16230291:C:T	C	T	4.1933e-06	0.833965	0.164147	0.226027	17639	rs34966560
1	16238134	ARHGEF19	chr1:16238134:G:A	G	A	1.37285e-05	1.05494	0.222042	0.109589	25482	rs12753224
1	169558942	F5	chr1:169558942:C:A	C	A	1.99599e-06	-0.405501	0.0767512	0.143836	-27539	rs9332569
1	171336809	FMO4	chr1:171336809:C:T	C	T	3.13785e-06	0.387085	0.0750156	0.287671	22626	rs7555359
1	171339693	FMO1	chr1:171339693:A:G	A	G	9.34548e-06	-0.561331	0.115529	0.417808	91199	rs2223477
1	171339693	FMO4	chr1:171339693:A:G	A	G	1.62871e-08	-0.419782	0.0640352	0.417808	25510	rs2223477
1	171339939	FMO4	chr1:171339939:C:G	C	G	1.62871e-08	-0.419782	0.0640352	0.417808	25756	rs12057885
1	171339939	FMO1	chr1:171339939:C:G	C	G	9.34548e-06	-0.561331	0.115529	0.417808	91445	rs12057885
1	171340480	FMO4	chr1:171340480:A:G	A	G	1.95945e-06	0.3812	0.0720832	0.30137	26297	rs12737633
1	171340480	FMO1	chr1:171340480:A:G	A	G	2.08381e-05	0.563405	0.121602	0.30137	91986	rs12737633
1	171341864	FMO4	chr1:171341864:A:C	A	C	1.17208e-06	-0.379681	0.0699575	0.30137	27681	rs1042772
1	171342216	FMO4	chr1:171342216:T:G	T	G	9.17683e-10	0.42522	0.0582485	0.438356	28033	rs12121479
1	171342216	FMO1	chr1:171342216:T:G	T	G	7.92429e-09	0.660665	0.097985	0.438356	93722	rs12121479
1	171342657	FMO4	chr1:171342657:C:T	C	T	3.13785e-06	0.387085	0.0750156	0.287671	28474	rs34668298
1	171342892	FMO4	chr1:171342892:G:A	G	A	9.17683e-10	0.42522	0.0582485	0.438356	28709	rs36112567
1	171342892	FMO1	chr1:171342892:G:A	G	A	7.92429e-09	0.660665	0.097985	0.438356	94398	rs36112567
1	171343077	FMO4	chr1:171343077:A:G	A	G	9.17683e-10	0.42522	0.0582485	0.438356	28894	rs10912810
1	171343077	FMO1	chr1:171343077:A:G	A	G	7.92429e-09	0.660665	0.097985	0.438356	94583	rs10912810
1	171344602	FMO1	chr1:171344602:C:T	C	T	7.92429e-09	0.660665	0.097985	0.438356	96108	rs7518648
1	171344602	FMO4	chr1:171344602:C:T	C	T	9.17683e-10	0.42522	0.0582485	0.438356	30419	rs7518648
1	171344796	FMO1	chr1:171344796:G:T	G	T	7.92429e-09	0.660665	0.097985	0.438356	96302	rs2235508
1	171344796	FMO4	chr1:171344796:G:T	G	T	9.17683e-10	0.42522	0.0582485	0.438356	30613	rs2235508
1	171344852	FMO1	chr1:171344852:T:A	T	A	7.92429e-09	0.660665	0.097985	0.438356	96358	rs2235509
1	171344852	FMO4	chr1:171344852:T:A	T	A	9.17683e-10	0.42522	0.0582485	0.438356	30669	rs2235509
1	171345003	FMO4	chr1:171345003:T:C	T	C	9.17683e-10	0.42522	0.0582485	0.438356	30820	rs2235510
1	171345003	FMO1	chr1:171345003:T:C	T	C	7.92429e-09	0.660665	0.097985	0.438356	96509	rs2235510
1	171345118	FMO4	chr1:171345118:T:G	T	G	4.14029e-08	0.394714	0.0625298	0.321918	30935	rs2235511
1	171345118	FMO1	chr1:171345118:T:G	T	G	2.36302e-05	0.518468	0.112773	0.321918	96624	rs2235511
1	171346438	FMO1	chr1:171346438:T:C	T	C	2.18441e-06	-0.610857	0.116159	0.424658	97944	rs2143090
1	171346438	FMO4	chr1:171346438:T:C	T	C	1.60027e-07	-0.408396	0.0685493	0.424658	32255	rs2143090
1	171346507	FMO1	chr1:171346507:T:C	T	C	9.34548e-06	-0.561331	0.115529	0.417808	98013	rs2179375
1	171346507	FMO4	chr1:171346507:T:C	T	C	1.62871e-08	-0.419782	0.0640352	0.417808	32324	rs2179375
1	171347751	FMO4	chr1:171347751:C:T	C	T	1.62871e-08	-0.419782	0.0640352	0.417808	33568	rs6425167
1	171347751	FMO1	chr1:171347751:C:T	C	T	9.34548e-06	-0.561331	0.115529	0.417808	99257	rs6425167
1	171348019	FMO1	chr1:171348019:T:A	T	A	2.36302e-05	0.518468	0.112773	0.321918	99525	rs7519001
1	171348019	FMO4	chr1:171348019:T:A	T	A	4.14029e-08	0.394714	0.0625298	0.321918	33836	rs7519001
1	171348218	FMO4	chr1:171348218:G:A	G	A	3.13785e-06	0.387085	0.0750156	0.287671	34035	rs7548166
1	171348948	FMO4	chr1:171348948:C:A	C	A	4.14029e-08	0.394714	0.0625298	0.321918	34765	rs35062585
1	171348948	FMO1	chr1:171348948:C:A	C	A	2.36302e-05	0.518468	0.112773	0.321918	100454	rs35062585
1	171349036	FMO1	chr1:171349036:T:C	T	C	2.36302e-05	0.518468	0.112773	0.321918	100542	rs6667507
1	171349036	FMO4	chr1:171349036:T:C	T	C	4.14029e-08	0.394714	0.0625298	0.321918	34853	rs6667507
1	171349342	FMO4	chr1:171349342:C:T	C	T	4.14029e-08	0.394714	0.0625298	0.321918	35159	rs6662297
1	171349342	FMO1	chr1:171349342:C:T	C	T	2.36302e-05	0.518468	0.112773	0.321918	100848	rs6662297
1	171350346	FMO1	chr1:171350346:G:A	G	A	9.34548e-06	-0.561331	0.115529	0.417808	101852	rs6656117
1	171350346	FMO4	chr1:171350346:G:A	G	A	1.62871e-08	-0.419782	0.0640352	0.417808	36163	rs6656117
1	171350391	FMO4	chr1:171350391:G:A	G	A	4.14029e-08	0.394714	0.0625298	0.321918	36208	rs67595287
1	171350391	FMO1	chr1:171350391:G:A	G	A	2.36302e-05	0.518468	0.112773	0.321918	101897	rs67595287
1	171350470	FMO1	chr1:171350470:G:A	G	A	3.82587e-07	-0.564687	0.0986022	0.465753	101976	rs6656219
1	171350470	FMO4	chr1:171350470:G:A	G	A	4.43267e-09	-0.388727	0.0563945	0.465753	36287	rs6656219
1	171351256	FMO1	chr1:171351256:A:T	A	T	3.82587e-07	-0.564687	0.0986022	0.465753	102762	rs10912830
1	171351256	FMO4	chr1:171351256:A:T	A	T	4.43267e-09	-0.388727	0.0563945	0.465753	37073	rs10912830
1	171351583	FMO1	chr1:171351583:T:C	T	C	2.36302e-05	0.518468	0.112773	0.321918	103089	rs12735239
1	171351583	FMO4	chr1:171351583:T:C	T	C	4.14029e-08	0.394714	0.0625298	0.321918	37400	rs12735239
1	171352232	FMO4	chr1:171352232:G:A	G	A	4.14029e-08	0.394714	0.0625298	0.321918	38049	rs12747017
1	171352232	FMO1	chr1:171352232:G:A	G	A	2.36302e-05	0.518468	0.112773	0.321918	103738	rs12747017
1	171352260	FMO4	chr1:171352260:T:A	T	A	3.13785e-06	0.387085	0.0750156	0.287671	38077	rs12736204
1	171352410	FMO1	chr1:171352410:T:C	T	C	9.34548e-06	-0.561331	0.115529	0.417808	103916	rs12064618
1	171352410	FMO4	chr1:171352410:T:C	T	C	1.62871e-08	-0.419782	0.0640352	0.417808	38227	rs12064618
1	171352649	FMO4	chr1:171352649:A:G	A	G	1.95945e-06	0.3812	0.0720832	0.30137	38466	rs1024171
1	171352649	FMO1	chr1:171352649:A:G	A	G	2.08381e-05	0.563405	0.121602	0.30137	104155	rs1024171
1	171353307	FMO4	chr1:171353307:C:T	C	T	3.76727e-07	0.366368	0.0639272	0.342466	39124	rs1963273
1	171353307	FMO1	chr1:171353307:C:T	C	T	7.59652e-06	0.535994	0.10902	0.342466	104813	rs1963273
1	171353659	FMO1	chr1:171353659:C:T	C	T	9.34548e-06	-0.561331	0.115529	0.417808	105165	rs1024173
1	171353659	FMO4	chr1:171353659:C:T	C	T	1.62871e-08	-0.419782	0.0640352	0.417808	39476	rs1024173
1	171353889	FMO4	chr1:171353889:A:C	A	C	1.62871e-08	-0.419782	0.0640352	0.417808	39706	rs4615872
1	171353889	FMO1	chr1:171353889:A:C	A	C	9.34548e-06	-0.561331	0.115529	0.417808	105395	rs4615872
1	171354060	FMO1	chr1:171354060:G:A	G	A	7.59652e-06	0.535994	0.10902	0.342466	105566	rs2011548
1	171354060	FMO4	chr1:171354060:G:A	G	A	3.76727e-07	0.366368	0.0639272	0.342466	39877	rs2011548
1	171354878	FMO4	chr1:171354878:G:A	G	A	1.6516e-07	-0.393302	0.0661082	0.335616	40695	rs6670432
1	171355209	FMO4	chr1:171355209:T:C	T	C	3.76727e-07	0.366368	0.0639272	0.342466	41026	rs6688317
1	171355209	FMO1	chr1:171355209:T:C	T	C	7.59652e-06	0.535994	0.10902	0.342466	106715	rs6688317
1	171356249	FMO1	chr1:171356249:G:A	G	A	7.59652e-06	0.535994	0.10902	0.342466	107755	rs10157634
1	171356249	FMO4	chr1:171356249:G:A	G	A	3.76727e-07	0.366368	0.0639272	0.342466	42066	rs10157634
1	171356547	FMO4	chr1:171356547:AT:A	AT	A	3.76727e-07	0.366368	0.0639272	0.342466	42364	rs398049738
1	171356547	FMO4	chr1:171356547:AT:A	AT	A	3.76727e-07	0.366368	0.0639272	0.342466	42364	rs10709760
1	171356547	FMO1	chr1:171356547:AT:A	AT	A	7.59652e-06	0.535994	0.10902	0.342466	108053	rs398049738
1	171356547	FMO1	chr1:171356547:AT:A	AT	A	7.59652e-06	0.535994	0.10902	0.342466	108053	rs10709760
1	171357369	FMO4	chr1:171357369:G:A	G	A	1.6516e-07	-0.393302	0.0661082	0.335616	43186	rs980120
1	171358267	FMO1	chr1:171358267:A:AT	A	AT	5.84086e-06	-0.567343	0.113712	0.424658	109773	rs34067351
1	171358267	FMO4	chr1:171358267:A:AT	A	AT	4.58297e-08	-0.406322	0.0646404	0.424658	44084	rs34067351
1	171358489	FMO1	chr1:171358489:T:C	T	C	9.34548e-06	-0.561331	0.115529	0.417808	109995	rs6425192
1	171358489	FMO4	chr1:171358489:T:C	T	C	1.62871e-08	-0.419782	0.0640352	0.417808	44306	rs6425192
1	171358944	FMO1	chr1:171358944:T:C	T	C	9.34548e-06	-0.561331	0.115529	0.417808	110450	rs6425194
1	171358944	FMO4	chr1:171358944:T:C	T	C	1.62871e-08	-0.419782	0.0640352	0.417808	44761	rs6425194
1	171360138	FMO1	chr1:171360138:A:G	A	G	1.81015e-06	-0.542081	0.10209	0.458904	111644	rs10912833
1	171360138	FMO4	chr1:171360138:A:G	A	G	5.42353e-08	-0.370429	0.059346	0.458904	45955	rs10912833
1	171360867	FMO4	chr1:171360867:A:C	A	C	4.43267e-09	-0.388727	0.0563945	0.465753	46684	rs10912834
1	171360867	FMO1	chr1:171360867:A:C	A	C	3.82587e-07	-0.564687	0.0986022	0.465753	112373	rs10912834
1	171361586	FMO1	chr1:171361586:T:C	T	C	9.39482e-06	0.56531	0.116383	0.465753	113092	rs10912836
1	171361586	FMO4	chr1:171361586:T:C	T	C	2.88479e-08	0.417255	0.065128	0.465753	47403	rs10912836
1	171363454	FMO1	chr1:171363454:G:C	G	C	1.40595e-06	0.625758	0.11635	0.438356	114960	rs4564181
1	171363454	FMO4	chr1:171363454:G:C	G	C	5.74068e-07	0.39707	0.0706683	0.438356	49271	rs4564181
1	171364433	FMO4	chr1:171364433:T:C	T	C	3.13785e-06	0.387085	0.0750156	0.287671	50250	rs10912841
1	171365654	FMO1	chr1:171365654:CTGTA:C	CTGTA	C	9.34548e-06	-0.561331	0.115529	0.417808	117160	rs36145221
1	171365654	FMO1	chr1:171365654:CTGTA:C	CTGTA	C	9.34548e-06	-0.561331	0.115529	0.417808	117160	rs58620591
1	171365654	FMO4	chr1:171365654:CTGTA:C	CTGTA	C	1.62871e-08	-0.419782	0.0640352	0.417808	51471	rs36145221
1	171365654	FMO4	chr1:171365654:CTGTA:C	CTGTA	C	1.62871e-08	-0.419782	0.0640352	0.417808	51471	rs58620591
1	171365688	FMO1	chr1:171365688:C:G	C	G	3.82587e-07	-0.564687	0.0986022	0.465753	117194	rs10912842
1	171365688	FMO4	chr1:171365688:C:G	C	G	4.43267e-09	-0.388727	0.0563945	0.465753	51505	rs10912842
1	171365934	FMO4	chr1:171365934:C:T	C	T	2.88479e-08	0.417255	0.065128	0.465753	51751	rs6699676
1	171365934	FMO1	chr1:171365934:C:T	C	T	9.39482e-06	0.56531	0.116383	0.465753	117440	rs6699676
1	171367203	FMO4	chr1:171367203:C:G	C	G	1.6516e-07	-0.393302	0.0661082	0.335616	53020	rs1018390
1	171367865	FMO4	chr1:171367865:T:C	T	C	3.70469e-06	0.447414	0.0874779	0.164384	53682	rs78909417
1	171371291	FMO4	chr1:171371291:T:C	T	C	1.6516e-07	-0.393302	0.0661082	0.335616	57108	rs1018391
1	171371553	FMO4	chr1:171371553:A:C	A	C	8.16087e-06	0.368694	0.0752969	0.321918	57370	rs12407579
1	171371960	FMO4	chr1:171371960:A:G	A	G	3.13785e-06	0.387085	0.0750156	0.287671	57777	rs11807475
1	171372697	FMO4	chr1:171372697:A:G	A	G	4.10928e-09	-0.436718	0.0631771	0.424658	58514	rs7516677
1	171372697	FMO1	chr1:171372697:A:G	A	G	6.86154e-06	-0.573914	0.116067	0.424658	124203	rs7516677
1	171378097	FMO4	chr1:171378097:A:G	A	G	7.68787e-08	-0.40114	0.065221	0.342466	63914	rs147349410
1	171380944	FMO4	chr1:171380944:C:T	C	T	3.70469e-06	0.447414	0.0874779	0.164384	66761	rs77965408
1	171384725	FMO4	chr1:171384725:C:T	C	T	3.78973e-06	0.3861	0.0755817	0.308219	70542	rs1018392
1	171385397	FMO4	chr1:171385397:G:C	G	C	2.57038e-05	0.362937	0.0793569	0.315068	71214	rs4916225
1	171386916	FMO1	chr1:171386916:GA:G	GA	G	2.36947e-05	0.494289	0.107532	0.493151	138422	rs34999236
1	171387110	FMO4	chr1:171387110:G:T	G	T	2.58104e-05	0.338653	0.0740663	0.479452	72927	rs10912872
1	171433528	FMO4	chr1:171433528:T:C	T	C	1.30298e-05	-0.767031	0.160946	0.0684932	119345	rs12127476
1	172050881	VAMP4	chr1:172050881:C:CT	C	CT	1.76755e-07	-1.40274	0.236491	0.0547945	308816	rs527510732
1	172050881	VAMP4	chr1:172050881:C:CT	C	CT	1.76755e-07	-1.40274	0.236491	0.0547945	308816	rs140391349
1	1732013	CDK11B	chr1:1732013:G:A	G	A	3.03119e-06	-0.939922	0.18182	0.136986	73009	rs35158882
1	1732412	CDK11B	chr1:1732412:G:C	G	C	3.03119e-06	-0.939922	0.18182	0.136986	73408	rs2294486
1	1732422	CDK11B	chr1:1732422:G:A	G	A	3.03119e-06	-0.939922	0.18182	0.136986	73418	rs2294487
1	1733576	CDK11B	chr1:1733576:G:A	G	A	3.03119e-06	-0.939922	0.18182	0.136986	74572	rs79125954
1	1735884	CDK11B	chr1:1735884:C:T	C	T	3.03119e-06	-0.939922	0.18182	0.136986	76880	rs78368772
1	1736472	CDK11B	chr1:1736472:C:T	C	T	3.03119e-06	-0.939922	0.18182	0.136986	77468	rs2377206
1	173681923	CENPL	chr1:173681923:A:G	A	G	1.44051e-06	0.455985	0.0848871	0.30137	-142960	rs11487390
1	173683432	CENPL	chr1:173683432:A:G	A	G	1.44051e-06	0.455985	0.0848871	0.30137	-141451	rs78521753
1	173683432	CENPL	chr1:173683432:A:G	A	G	1.44051e-06	0.455985	0.0848871	0.30137	-141451	rs374959550
1	173683432	CENPL	chr1:173683432:A:G	A	G	1.44051e-06	0.455985	0.0848871	0.30137	-141451	rs11487391
1	173685015	CENPL	chr1:173685015:A:G	A	G	1.44051e-06	0.455985	0.0848871	0.30137	-139868	rs10158568
1	173689133	CENPL	chr1:173689133:T:C	T	C	1.44051e-06	0.455985	0.0848871	0.30137	-135750	rs28853918
1	173691130	CENPL	chr1:173691130:G:A	G	A	2.61508e-06	0.447315	0.0858599	0.294521	-133753	rs10157684
1	173691307	CENPL	chr1:173691307:T:C	T	C	2.61508e-06	0.447315	0.0858599	0.294521	-133576	rs10157218
1	173691465	CENPL	chr1:173691465:A:C	A	C	2.61508e-06	0.447315	0.0858599	0.294521	-133418	rs10157215
1	173691647	CENPL	chr1:173691647:T:A	T	A	2.61508e-06	0.447315	0.0858599	0.294521	-133236	rs10157371
1	173691883	CENPL	chr1:173691883:T:C	T	C	2.61508e-06	0.447315	0.0858599	0.294521	-133000	rs10157384
1	173693993	CENPL	chr1:173693993:A:G	A	G	2.61508e-06	0.447315	0.0858599	0.294521	-130890	rs10399912
1	173695314	CENPL	chr1:173695314:C:T	C	T	2.61508e-06	0.447315	0.0858599	0.294521	-129569	rs10912668
1	173697153	CENPL	chr1:173697153:A:G	A	G	2.61508e-06	0.447315	0.0858599	0.294521	-127730	rs12058641
1	173713226	CENPL	chr1:173713226:G:A	G	A	2.39897e-07	0.469736	0.0802867	0.321918	-111657	rs7550036
1	173718293	CENPL	chr1:173718293:C:A	C	A	2.39897e-07	0.469736	0.0802867	0.321918	-106590	rs112837934
1	173719249	CENPL	chr1:173719249:T:C	T	C	2.39897e-07	0.469736	0.0802867	0.321918	-105634	rs7544583
1	173719309	CENPL	chr1:173719309:G:A	G	A	1.59636e-06	0.450813	0.0843607	0.30137	-105574	rs78453473
1	173721464	CENPL	chr1:173721464:T:C	T	C	2.39897e-07	0.469736	0.0802867	0.321918	-103419	rs12080389
1	173725092	CENPL	chr1:173725092:A:G	A	G	1.51984e-07	0.489773	0.0820213	0.315068	-99791	rs6658217
1	173726086	CENPL	chr1:173726086:G:A	G	A	2.39897e-07	0.469736	0.0802867	0.321918	-98797	rs13375555
1	173727206	CENPL	chr1:173727206:G:A	G	A	2.39897e-07	0.469736	0.0802867	0.321918	-97677	rs12083944
1	173727404	CENPL	chr1:173727404:A:G	A	G	2.39897e-07	0.469736	0.0802867	0.321918	-97479	rs144262494
1	173727445	CENPL	chr1:173727445:T:C	T	C	2.39897e-07	0.469736	0.0802867	0.321918	-97438	rs142270664
1	173728624	CENPL	chr1:173728624:T:C	T	C	2.39897e-07	0.469736	0.0802867	0.321918	-96259	rs11487392
1	173729695	CENPL	chr1:173729695:A:G	A	G	4.06498e-06	0.479435	0.0942077	0.239726	-95188	rs12083423
1	173730454	CENPL	chr1:173730454:A:T	A	T	2.39897e-07	0.469736	0.0802867	0.321918	-94429	rs28866006
1	173730503	CENPL	chr1:173730503:T:G	T	G	1.59636e-06	0.450813	0.0843607	0.30137	-94380	rs28860844
1	173732103	CENPL	chr1:173732103:A:G	A	G	2.39897e-07	0.469736	0.0802867	0.321918	-92780	rs111444037
1	173734789	CENPL	chr1:173734789:C:T	C	T	2.39897e-07	0.469736	0.0802867	0.321918	-90094	rs12098124
1	173735294	CENPL	chr1:173735294:A:G	A	G	2.39897e-07	0.469736	0.0802867	0.321918	-89589	rs112579850
1	173736721	CENPL	chr1:173736721:G:A	G	A	1.59636e-06	0.450813	0.0843607	0.30137	-88162	rs12090440
1	173739263	CENPL	chr1:173739263:G:A	G	A	1.59636e-06	0.450813	0.0843607	0.30137	-85620	rs12093624
1	173739641	CENPL	chr1:173739641:T:G	T	G	4.5877e-06	0.440724	0.0871707	0.294521	-85242	rs12091187
1	173740284	CENPL	chr1:173740284:G:A	G	A	2.39897e-07	0.469736	0.0802867	0.321918	-84599	rs12095090
1	173740670	CENPL	chr1:173740670:G:A	G	A	2.39897e-07	0.469736	0.0802867	0.321918	-84213	rs10912677
1	173742012	CENPL	chr1:173742012:C:T	C	T	5.12344e-06	0.399634	0.079522	0.40411	-82871	rs12067571
1	173742981	CENPL	chr1:173742981:A:G	A	G	2.39897e-07	0.469736	0.0802867	0.321918	-81902	rs10912678
1	173743065	CENPL	chr1:173743065:A:G	A	G	1.59636e-06	0.450813	0.0843607	0.30137	-81818	rs10158197
1	173744525	CENPL	chr1:173744525:T:C	T	C	2.39897e-07	0.469736	0.0802867	0.321918	-80358	rs10158663
1	173745548	CENPL	chr1:173745548:A:G	A	G	2.39897e-07	0.469736	0.0802867	0.321918	-79335	rs9970633
1	173747787	CENPL	chr1:173747787:A:G	A	G	2.39897e-07	0.469736	0.0802867	0.321918	-77096	rs12094130
1	173748154	CENPL	chr1:173748154:A:G	A	G	2.39897e-07	0.469736	0.0802867	0.321918	-76729	rs10912680
1	173751077	CENPL	chr1:173751077:T:A	T	A	2.39897e-07	0.469736	0.0802867	0.321918	-73806	rs10081990
1	173752948	CENPL	chr1:173752948:A:G	A	G	2.39897e-07	0.469736	0.0802867	0.321918	-71935	rs10912682
1	173753025	CENPL	chr1:173753025:T:G	T	G	2.39897e-07	0.469736	0.0802867	0.321918	-71858	rs6702485
1	173753406	CENPL	chr1:173753406:A:G	A	G	1.59636e-06	0.450813	0.0843607	0.30137	-71477	rs6425256
1	173753841	CENPL	chr1:173753841:T:A	T	A	2.39897e-07	0.469736	0.0802867	0.321918	-71042	rs6425257
1	173753969	CENPL	chr1:173753969:G:T	G	T	2.39897e-07	0.469736	0.0802867	0.321918	-70914	rs16846383
1	173754058	CENPL	chr1:173754058:C:CCAA	C	CCAA	2.39897e-07	0.469736	0.0802867	0.321918	-70825	rs111325471
1	173754058	CENPL	chr1:173754058:C:CCAA	C	CCAA	2.39897e-07	0.469736	0.0802867	0.321918	-70825	rs373236951
1	173755709	CENPL	chr1:173755709:T:C	T	C	2.39897e-07	0.469736	0.0802867	0.321918	-69174	rs6663880
1	173755962	CENPL	chr1:173755962:G:A	G	A	1.59636e-06	0.450813	0.0843607	0.30137	-68921	rs16846395
1	173756237	CENPL	chr1:173756237:C:G	C	G	1.59636e-06	0.450813	0.0843607	0.30137	-68646	rs16846398
1	173757558	CENPL	chr1:173757558:G:A	G	A	1.59636e-06	0.450813	0.0843607	0.30137	-67325	rs10912683
1	173758919	CENPL	chr1:173758919:C:T	C	T	1.59081e-05	0.416881	0.0885176	0.294521	-65964	rs112603441
1	173761192	CENPL	chr1:173761192:T:C	T	C	2.39897e-07	0.469736	0.0802867	0.321918	-63691	rs79482376
1	173761694	CENPL	chr1:173761694:G:A	G	A	2.39897e-07	0.469736	0.0802867	0.321918	-63189	rs12070556
1	173762813	CENPL	chr1:173762813:T:A	T	A	2.39897e-07	0.469736	0.0802867	0.321918	-62070	rs12060568
1	173763585	CENPL	chr1:173763585:C:T	C	T	2.39897e-07	0.469736	0.0802867	0.321918	-61298	rs10798298
1	173766239	CENPL	chr1:173766239:T:C	T	C	2.39897e-07	0.469736	0.0802867	0.321918	-58644	rs7536773
1	173766295	CENPL	chr1:173766295:C:T	C	T	2.39897e-07	0.469736	0.0802867	0.321918	-58588	rs7522788
1	173766389	CENPL	chr1:173766389:A:T	A	T	2.39897e-07	0.469736	0.0802867	0.321918	-58494	rs7534521
1	1737703	CDK11B	chr1:1737703:A:C	A	C	2.13152e-07	-0.786349	0.133687	0.212329	78699	rs200672606
1	1737704	CDK11B	chr1:1737704:C:T	C	T	3.03119e-06	-0.939922	0.18182	0.136986	78700	rs201524780
1	173772077	CENPL	chr1:173772077:T:C	T	C	1.59636e-06	0.450813	0.0843607	0.30137	-52806	rs9425413
1	173773185	CENPL	chr1:173773185:T:G	T	G	2.39897e-07	0.469736	0.0802867	0.321918	-51698	rs6686455
1	173774924	CENPL	chr1:173774924:C:A	C	A	2.39897e-07	0.469736	0.0802867	0.321918	-49959	rs9425734
1	173778102	CENPL	chr1:173778102:C:T	C	T	1.59636e-06	0.450813	0.0843607	0.30137	-46781	rs9425735
1	173782395	CENPL	chr1:173782395:G:A	G	A	1.59636e-06	0.450813	0.0843607	0.30137	-42488	rs9425414
1	173783226	CENPL	chr1:173783226:A:T	A	T	2.39897e-07	0.469736	0.0802867	0.321918	-41657	rs9286886
1	173784897	CENPL	chr1:173784897:C:T	C	T	2.39897e-07	0.469736	0.0802867	0.321918	-39986	rs9286887
1	173785367	CENPL	chr1:173785367:A:G	A	G	2.39897e-07	0.469736	0.0802867	0.321918	-39516	rs6692452
1	173788886	CENPL	chr1:173788886:T:C	T	C	4.82327e-05	0.347275	0.0790615	0.458904	-35997	rs58825445
1	173789137	CENPL	chr1:173789137:A:T	A	T	2.39897e-07	0.469736	0.0802867	0.321918	-35746	rs9425736
1	173792800	CENPL	chr1:173792800:C:T	C	T	2.39897e-07	0.469736	0.0802867	0.321918	-32083	rs9425738
1	173794588	CENPL	chr1:173794588:C:A	C	A	2.39897e-07	0.469736	0.0802867	0.321918	-30295	rs9425415
1	173796445	CENPL	chr1:173796445:A:G	A	G	2.39897e-07	0.469736	0.0802867	0.321918	-28438	rs9425740
1	173796499	CENPL	chr1:173796499:T:TC	T	TC	2.39897e-07	0.469736	0.0802867	0.321918	-28384	rs111335376
1	173797929	CENPL	chr1:173797929:C:T	C	T	2.39897e-07	0.469736	0.0802867	0.321918	-26954	rs9425741
1	173799847	CENPL	chr1:173799847:G:A	G	A	2.39897e-07	0.469736	0.0802867	0.321918	-25036	rs9425742
1	173800532	CENPL	chr1:173800532:AAAG:A	AAAG	A	2.39897e-07	0.469736	0.0802867	0.321918	-24351	rs58529781
1	173800532	CENPL	chr1:173800532:AAAG:A	AAAG	A	2.39897e-07	0.469736	0.0802867	0.321918	-24351	rs111993778
1	173800532	CENPL	chr1:173800532:AAAG:A	AAAG	A	2.39897e-07	0.469736	0.0802867	0.321918	-24351	rs796799955
1	173801153	CENPL	chr1:173801153:AATCT:A	AATCT	A	2.39897e-07	0.469736	0.0802867	0.321918	-23730	rs111662998
1	173802228	CENPL	chr1:173802228:C:T	C	T	2.39897e-07	0.469736	0.0802867	0.321918	-22655	rs59845733
1	173803368	CENPL	chr1:173803368:T:G	T	G	2.39897e-07	0.469736	0.0802867	0.321918	-21515	rs16846420
1	173803694	CENPL	chr1:173803694:T:C	T	C	2.39897e-07	0.469736	0.0802867	0.321918	-21189	rs12082206
1	173803963	CENPL	chr1:173803963:G:T	G	T	2.39897e-07	0.469736	0.0802867	0.321918	-20920	rs12085894
1	173809880	CENPL	chr1:173809880:G:A	G	A	2.39897e-07	0.469736	0.0802867	0.321918	-15003	rs9425418
1	173811821	CENPL	chr1:173811821:T:C	T	C	2.39897e-07	0.469736	0.0802867	0.321918	-13062	rs9425746
1	173813478	CENPL	chr1:173813478:C:T	C	T	2.39897e-07	0.469736	0.0802867	0.321918	-11405	rs9425747
1	173813879	CENPL	chr1:173813879:G:A	G	A	2.39897e-07	0.469736	0.0802867	0.321918	-11004	rs9425419
1	173814094	CENPL	chr1:173814094:C:T	C	T	2.39897e-07	0.469736	0.0802867	0.321918	-10789	rs9425420
1	173817315	CENPL	chr1:173817315:A:C	A	C	2.39897e-07	0.469736	0.0802867	0.321918	-7568	rs9425421
1	173817798	CENPL	chr1:173817798:T:C	T	C	1.59636e-06	0.450813	0.0843607	0.30137	-7085	rs6684147
1	173818806	CENPL	chr1:173818806:C:T	C	T	2.39897e-07	0.469736	0.0802867	0.321918	-6077	rs9425750
1	173818853	CENPL	chr1:173818853:C:T	C	T	2.39897e-07	0.469736	0.0802867	0.321918	-6030	rs9425751
1	173819269	CENPL	chr1:173819269:A:T	A	T	2.39897e-07	0.469736	0.0802867	0.321918	-5614	rs9425422
1	173820120	CENPL	chr1:173820120:C:T	C	T	2.39897e-07	0.469736	0.0802867	0.321918	-4763	rs9425423
1	173820369	CENPL	chr1:173820369:A:G	A	G	2.39897e-07	0.469736	0.0802867	0.321918	-4514	rs12096832
1	173822479	CENPL	chr1:173822479:G:A	G	A	2.39897e-07	0.469736	0.0802867	0.321918	-2404	rs9425752
1	173822809	CENPL	chr1:173822809:C:G	C	G	2.39897e-07	0.469736	0.0802867	0.321918	-2074	rs9970488
1	173823968	CENPL	chr1:173823968:C:T	C	T	2.39897e-07	0.469736	0.0802867	0.321918	-915	rs28578576
1	173827091	CENPL	chr1:173827091:G:C	G	C	2.39897e-07	0.469736	0.0802867	0.321918	2208	rs9286890
1	173827557	CENPL	chr1:173827557:G:A	G	A	2.39897e-07	0.469736	0.0802867	0.321918	2674	rs9425424
1	173827585	CENPL	chr1:173827585:T:C	T	C	2.39897e-07	0.469736	0.0802867	0.321918	2702	rs9425425
1	173828088	CENPL	chr1:173828088:T:C	T	C	2.39897e-07	0.469736	0.0802867	0.321918	3205	rs7552840
1	173828321	CENPL	chr1:173828321:C:G	C	G	1.59636e-06	0.450813	0.0843607	0.30137	3438	rs9425753
1	173828321	CENPL	chr1:173828321:C:G	C	G	1.59636e-06	0.450813	0.0843607	0.30137	3438	rs59641795
1	1738309	CDK11B	chr1:1738309:A:G	A	G	3.03119e-06	-0.939922	0.18182	0.136986	79305	rs4648615
1	173833858	CENPL	chr1:173833858:T:C	T	C	2.39897e-07	0.469736	0.0802867	0.321918	8975	rs111556737
1	173833861	CENPL	chr1:173833861:C:G	C	G	2.39897e-07	0.469736	0.0802867	0.321918	8978	rs113685558
1	173838414	CENPL	chr1:173838414:CT:C	CT	C	2.39897e-07	0.469736	0.0802867	0.321918	13531	rs111398321
1	173840376	CENPL	chr1:173840376:T:C	T	C	2.39897e-07	0.469736	0.0802867	0.321918	15493	rs1115487
1	173841101	CENPL	chr1:173841101:A:G	A	G	2.39897e-07	0.469736	0.0802867	0.321918	16218	rs6675762
1	173841541	CENPL	chr1:173841541:A:C	A	C	2.39897e-07	0.469736	0.0802867	0.321918	16658	rs6678824
1	173841542	CENPL	chr1:173841542:G:A	G	A	2.39897e-07	0.469736	0.0802867	0.321918	16659	rs6689764
1	173844310	CENPL	chr1:173844310:T:G	T	G	2.39897e-07	0.469736	0.0802867	0.321918	19427	rs6691327
1	173844866	CENPL	chr1:173844866:T:C	T	C	2.39897e-07	0.469736	0.0802867	0.321918	19983	rs6691922
1	173846186	CENPL	chr1:173846186:C:A	C	A	2.39897e-07	0.469736	0.0802867	0.321918	21303	rs12085748
1	173846758	CENPL	chr1:173846758:C:T	C	T	2.39897e-07	0.469736	0.0802867	0.321918	21875	rs9425426
1	173851884	CENPL	chr1:173851884:C:T	C	T	2.39897e-07	0.469736	0.0802867	0.321918	27001	rs1474907
1	173852644	CENPL	chr1:173852644:A:C	A	C	2.39897e-07	0.469736	0.0802867	0.321918	27761	rs6698348
1	173855246	CENPL	chr1:173855246:C:G	C	G	2.39897e-07	0.469736	0.0802867	0.321918	30363	rs6695782
1	173856229	CENPL	chr1:173856229:A:T	A	T	1.30488e-06	0.45443	0.0841792	0.294521	31346	rs7518130
1	173857915	CENPL	chr1:173857915:T:C	T	C	2.39897e-07	0.469736	0.0802867	0.321918	33032	rs9425758
1	173860475	CENPL	chr1:173860475:C:T	C	T	1.30488e-06	0.45443	0.0841792	0.294521	35592	rs9425759
1	173860687	CENPL	chr1:173860687:A:C	A	C	2.39897e-07	0.469736	0.0802867	0.321918	35804	rs9282959
1	173860841	CENPL	chr1:173860841:C:T	C	T	2.39897e-07	0.469736	0.0802867	0.321918	35958	rs9282960
1	173861026	CENPL	chr1:173861026:G:A	G	A	2.39897e-07	0.469736	0.0802867	0.321918	36143	rs9286894
1	173862073	CENPL	chr1:173862073:G:A	G	A	2.39897e-07	0.469736	0.0802867	0.321918	37190	rs78900652
1	173862074	CENPL	chr1:173862074:T:A	T	A	2.39897e-07	0.469736	0.0802867	0.321918	37191	rs76053382
1	173862503	CENPL	chr1:173862503:G:A	G	A	2.39897e-07	0.469736	0.0802867	0.321918	37620	rs2224657
1	173863668	CENPL	chr1:173863668:A:G	A	G	2.39897e-07	0.469736	0.0802867	0.321918	38785	rs1322771
1	173865218	CENPL	chr1:173865218:A:G	A	G	2.39897e-07	0.469736	0.0802867	0.321918	40335	rs9442660
1	173866363	CENPL	chr1:173866363:T:C	T	C	1.59636e-06	0.450813	0.0843607	0.30137	41480	rs9425427
1	173866620	CENPL	chr1:173866620:C:A	C	A	2.39897e-07	0.469736	0.0802867	0.321918	41737	rs1322772
1	173866781	CENPL	chr1:173866781:T:A	T	A	1.59636e-06	0.450813	0.0843607	0.30137	41898	rs13476
1	173869331	CENPL	chr1:173869331:AGTTGAAACTGTACTTTCAACTATCTT:A	AGTTGAAACTGTACTTTCAACTATCTT	A	2.39897e-07	0.469736	0.0802867	0.321918	44448	rs11271139
1	173869331	CENPL	chr1:173869331:AGTTGAAACTGTACTTTCAACTATCTT:A	AGTTGAAACTGTACTTTCAACTATCTT	A	2.39897e-07	0.469736	0.0802867	0.321918	44448	rs58198800
1	173870297	CENPL	chr1:173870297:G:A	G	A	2.39897e-07	0.469736	0.0802867	0.321918	45414	rs9425761
1	173872214	CENPL	chr1:173872214:C:G	C	G	4.62216e-05	0.369486	0.0838824	0.410959	47331	rs9425762
1	173877247	CENPL	chr1:173877247:C:A	C	A	1.59636e-06	0.450813	0.0843607	0.30137	52364	rs4652225
1	173878631	CENPL	chr1:173878631:C:T	C	T	4.62216e-05	0.369486	0.0838824	0.410959	53748	rs9425428
1	173879968	CENPL	chr1:173879968:G:C	G	C	4.62216e-05	0.369486	0.0838824	0.410959	55085	rs12060191
1	173881640	CENPL	chr1:173881640:C:T	C	T	4.62216e-05	0.369486	0.0838824	0.410959	56757	rs57995528
1	173882040	CENPL	chr1:173882040:G:C	G	C	4.62216e-05	0.369486	0.0838824	0.410959	57157	rs11489771
1	173884445	CENPL	chr1:173884445:A:G	A	G	1.59636e-06	0.450813	0.0843607	0.30137	59562	rs67296213
1	173885521	CENPL	chr1:173885521:C:T	C	T	4.62216e-05	0.369486	0.0838824	0.410959	60638	rs4652283
1	173887994	CENPL	chr1:173887994:G:T	G	T	1.59636e-06	0.450813	0.0843607	0.30137	63111	rs9425768
1	173889386	CENPL	chr1:173889386:C:T	C	T	4.62216e-05	0.369486	0.0838824	0.410959	64503	rs4652298
1	173893488	CENPL	chr1:173893488:C:T	C	T	4.62216e-05	0.369486	0.0838824	0.410959	68605	rs9425431
1	173894361	CENPL	chr1:173894361:C:T	C	T	4.62216e-05	0.369486	0.0838824	0.410959	69478	rs4652328
1	173895742	CENPL	chr1:173895742:C:T	C	T	4.62216e-05	0.369486	0.0838824	0.410959	70859	rs9425433
1	173896268	CENPL	chr1:173896268:A:G	A	G	4.62216e-05	0.369486	0.0838824	0.410959	71385	rs1322779
1	173896523	CENPL	chr1:173896523:T:C	T	C	4.62216e-05	0.369486	0.0838824	0.410959	71640	rs9425434
1	173897958	CENPL	chr1:173897958:G:C	G	C	4.62216e-05	0.369486	0.0838824	0.410959	73075	rs12063818
1	173900218	CENPL	chr1:173900218:TG:T	TG	T	1.59636e-06	0.450813	0.0843607	0.30137	75335	rs71659254
1	173900492	CENPL	chr1:173900492:A:G	A	G	4.62216e-05	0.369486	0.0838824	0.410959	75609	rs2295958
1	173901226	CENPL	chr1:173901226:G:A	G	A	4.62216e-05	0.369486	0.0838824	0.410959	76343	rs9425436
1	173905465	CENPL	chr1:173905465:AT:A	AT	A	2.47449e-06	0.413676	0.0791741	0.363014	80582	rs2227616
1	173915601	CENPL	chr1:173915601:C:G	C	G	7.52675e-06	0.394334	0.0801652	0.40411	90718	rs2227597
1	173916343	CENPL	chr1:173916343:C:T	C	T	7.52675e-06	0.394334	0.0801652	0.40411	91460	rs2227594
1	173916398	CENPL	chr1:173916398:G:T	G	T	7.52675e-06	0.394334	0.0801652	0.40411	91515	rs2227593
1	173916899	CENPL	chr1:173916899:G:A	G	A	9.08752e-06	0.404432	0.0831039	0.40411	92016	rs2227590
1	1740017	CDK11B	chr1:1740017:C:T	C	T	3.03119e-06	-0.939922	0.18182	0.136986	81013	rs113944771
1	1740107	CDK11B	chr1:1740107:G:A	G	A	3.03119e-06	-0.939922	0.18182	0.136986	81103	rs111371617
1	1740160	CDK11B	chr1:1740160:G:A	G	A	3.03119e-06	-0.939922	0.18182	0.136986	81156	rs113051634
1	1742672	CDK11B	chr1:1742672:C:T	C	T	3.03119e-06	-0.939922	0.18182	0.136986	83668	rs72634839
1	1743238	CDK11B	chr1:1743238:G:C	G	C	3.03119e-06	-0.939922	0.18182	0.136986	84234	rs11486028
1	1753033	CDK11B	chr1:1753033:C:T	C	T	1.24076e-05	-0.860875	0.180118	0.136986	94029	rs7407
1	1754482	CDK11B	chr1:1754482:TCCCTGGGACCGAAGTCGCCCCA:T	TCCCTGGGACCGAAGTCGCCCCA	T	1.20582e-05	-0.860443	0.179727	0.150685	95478	rs374697661
1	1754482	CDK11B	chr1:1754482:TCCCTGGGACCGAAGTCGCCCCA:T	TCCCTGGGACCGAAGTCGCCCCA	T	1.20582e-05	-0.860443	0.179727	0.150685	95478	rs778547966
1	1754482	CDK11B	chr1:1754482:TCCCTGGGACCGAAGTCGCCCCA:T	TCCCTGGGACCGAAGTCGCCCCA	T	1.20582e-05	-0.860443	0.179727	0.150685	95478	rs757879096
1	1754482	CDK11B	chr1:1754482:TCCCTGGGACCGAAGTCGCCCCA:T	TCCCTGGGACCGAAGTCGCCCCA	T	1.20582e-05	-0.860443	0.179727	0.150685	95478	rs745397248
1	1754482	CDK11B	chr1:1754482:TCCCTGGGACCGAAGTCGCCCCA:T	TCCCTGGGACCGAAGTCGCCCCA	T	1.20582e-05	-0.860443	0.179727	0.150685	95478	rs139385870
1	177969302	SEC16B	chr1:177969302:G:A	G	A	3.41505e-09	0.646008	0.0928108	0.390411	-756	rs6682862
1	184045458	TSEN15	chr1:184045458:T:C	T	C	7.05004e-07	0.64562	0.116039	0.260274	-6272	rs34876045
1	184046529	TSEN15	chr1:184046529:G:A	G	A	7.05004e-07	0.64562	0.116039	0.260274	-5201	rs765224
1	184046573	TSEN15	chr1:184046573:C:G	C	G	2.03332e-06	0.627905	0.11896	0.267123	-5157	rs765225
1	184047651	TSEN15	chr1:184047651:A:G	A	G	3.91185e-07	0.662504	0.115802	0.287671	-4079	rs1926873
1	184058542	TSEN15	chr1:184058542:T:C	T	C	3.91185e-07	0.662504	0.115802	0.287671	6812	rs16822379
1	184060584	TSEN15	chr1:184060584:A:G	A	G	1.21039e-07	0.680087	0.112761	0.280822	8854	rs12751711
1	184062427	TSEN15	chr1:184062427:A:C	A	C	3.91185e-07	0.662504	0.115802	0.287671	10697	rs1409812
1	184065041	TSEN15	chr1:184065041:G:T	G	T	1.21039e-07	0.680087	0.112761	0.280822	13311	rs12402790
1	184070601	TSEN15	chr1:184070601:T:A	T	A	1.21039e-07	0.680087	0.112761	0.280822	18871	rs56239295
1	184547101	C1orf21	chr1:184547101:AG:A	AG	A	1.22942e-05	-0.454382	0.0950178	0.376712	160072	rs34356565
1	184570423	C1orf21	chr1:184570423:A:G	A	G	5.22313e-06	-0.536007	0.106771	0.239726	183394	rs16823313
1	185753940	EDEM3	chr1:185753940:G:A	G	A	3.05297e-06	0.583449	0.112906	0.280822	999082	rs57398679
1	18754384	AKR7A3	chr1:18754384:T:C	T	C	6.01013e-06	-0.710606	0.142653	0.171233	-534386	rs12405928
1	18771786	AKR7A3	chr1:18771786:C:T	C	T	2.44715e-06	-0.749055	0.14328	0.171233	-516984	rs12751864
1	200681362	DDX59	chr1:200681362:C:T	C	T	1.1174e-06	-0.819087	0.150563	0.342466	11455	rs12082129
1	203348034	FMOD	chr1:203348034:C:T	C	T	3.04213e-07	0.733975	0.126814	0.363014	-3088	rs7543148
1	203351280	FMOD	chr1:203351280:G:C	G	C	1.43671e-07	0.808702	0.135096	0.458904	158	rs4971252
1	203352286	FMOD	chr1:203352286:A:G	A	G	4.76821e-06	-0.640924	0.127035	0.479452	1164	rs4971253
1	205775418	RAB29	chr1:205775418:C:A	C	A	3.77189e-06	0.661451	0.129451	0.479452	-64	rs823144
1	205776556	RAB29	chr1:205776556:C:T	C	T	1.98938e-06	0.704449	0.133312	0.424658	1074	rs1775151
1	205776654	RAB29	chr1:205776654:T:C	T	C	3.04962e-06	-0.683358	0.132232	0.472603	1172	rs1772153
1	205776804	RAB29	chr1:205776804:C:T	C	T	3.04962e-06	-0.683358	0.132232	0.472603	1322	rs1772154
1	205779181	RAB29	chr1:205779181:G:A	G	A	3.04962e-06	-0.683358	0.132232	0.472603	3699	rs10900524
1	205782068	RAB29	chr1:205782068:C:T	C	T	1.21184e-05	0.639204	0.133554	0.493151	6586	rs863725
1	205783537	RAB29	chr1:205783537:A:G	A	G	9.13957e-06	0.650368	0.133683	0.486301	8055	rs947211
1	205783766	RAB29	chr1:205783766:T:C	T	C	6.94271e-06	-0.676893	0.136983	0.465753	8284	rs1772156
1	205783969	RAB29	chr1:205783969:A:G	A	G	1.21184e-05	0.639204	0.133554	0.493151	8487	rs885224
1	205784547	RAB29	chr1:205784547:G:A	G	A	4.4212e-06	-0.683392	0.134897	0.472603	9065	rs1775158
1	205784680	RAB29	chr1:205784680:T:C	T	C	6.94271e-06	-0.676893	0.136983	0.465753	9198	rs1772157
1	205784684	RAB29	chr1:205784684:A:G	A	G	4.4212e-06	-0.683392	0.134897	0.472603	9202	rs1775159
1	205784749	RAB29	chr1:205784749:C:A	C	A	1.21184e-05	0.639204	0.133554	0.493151	9267	rs5014256
1	205786422	RAB29	chr1:205786422:C:T	C	T	1.33271e-05	0.691555	0.145302	0.424658	10940	rs1775143
1	20713586	KIF17	chr1:20713586:C:A	C	A	8.31017e-07	0.903405	0.163667	0.226027	-4421	rs10799661
1	20717433	KIF17	chr1:20717433:T:C	T	C	1.63906e-08	1.00659	0.153587	0.212329	-574	rs604645
1	207195244	CD55	chr1:207195244:CCA:C	CCA	C	5.17351e-06	0.581454	0.115764	0.308219	-126434	rs75689548
1	20720599	KIF17	chr1:20720599:A:T	A	T	4.73379e-08	0.945892	0.150682	0.212329	2592	rs671905
1	207210723	CD55	chr1:207210723:T:C	T	C	5.17351e-06	0.581454	0.115764	0.308219	-110955	rs7532422
1	207216859	CD55	chr1:207216859:C:T	C	T	5.17351e-06	0.581454	0.115764	0.308219	-104819	rs6673080
1	207221638	CD55	chr1:207221638:T:C	T	C	5.17351e-06	0.581454	0.115764	0.308219	-100040	rs6540874
1	207228335	CD55	chr1:207228335:G:C	G	C	7.6205e-06	0.595307	0.121106	0.30137	-93343	rs6683677
1	207234357	CD55	chr1:207234357:T:C	T	C	7.6205e-06	0.595307	0.121106	0.30137	-87321	rs12119823
1	207238567	CD55	chr1:207238567:T:C	T	C	7.6205e-06	0.595307	0.121106	0.30137	-83111	rs11580394
1	207239696	CD55	chr1:207239696:G:A	G	A	2.27393e-06	0.620637	0.118264	0.294521	-81982	rs76258276
1	207240098	CD55	chr1:207240098:A:G	A	G	2.27393e-06	0.620637	0.118264	0.294521	-81580	rs7526658
1	207240370	CD55	chr1:207240370:C:G	C	G	2.27393e-06	0.620637	0.118264	0.294521	-81308	rs11120512
1	207241050	CD55	chr1:207241050:G:A	G	A	2.27393e-06	0.620637	0.118264	0.294521	-80628	rs7516416
1	207241788	CD55	chr1:207241788:C:T	C	T	2.27393e-06	0.620637	0.118264	0.294521	-79890	rs6673890
1	207243122	CD55	chr1:207243122:A:C	A	C	2.27393e-06	0.620637	0.118264	0.294521	-78556	rs6682586
1	207243462	CD55	chr1:207243462:G:C	G	C	2.27393e-06	0.620637	0.118264	0.294521	-78216	rs6668560
1	207244081	CD55	chr1:207244081:A:G	A	G	2.27393e-06	0.620637	0.118264	0.294521	-77597	rs7522618
1	207244306	CD55	chr1:207244306:A:AC	A	AC	2.27393e-06	0.620637	0.118264	0.294521	-77372	rs76025171
1	207245047	CD55	chr1:207245047:A:C	A	C	2.27393e-06	0.620637	0.118264	0.294521	-76631	rs11580382
1	207245063	CD55	chr1:207245063:A:G	A	G	2.27393e-06	0.620637	0.118264	0.294521	-76615	rs11580387
1	207246998	CD55	chr1:207246998:G:A	G	A	2.27393e-06	0.620637	0.118264	0.294521	-74680	rs7518565
1	207251041	CD55	chr1:207251041:C:G	C	G	2.27393e-06	0.620637	0.118264	0.294521	-70637	rs10494890
1	207253598	CD55	chr1:207253598:C:T	C	T	2.27393e-06	0.620637	0.118264	0.294521	-68080	rs7532664
1	207255597	CD55	chr1:207255597:C:T	C	T	2.27393e-06	0.620637	0.118264	0.294521	-66081	rs55638602
1	207256095	CD55	chr1:207256095:A:G	A	G	2.27393e-06	0.620637	0.118264	0.294521	-65583	rs61822673
1	207256323	CD55	chr1:207256323:T:C	T	C	2.27393e-06	0.620637	0.118264	0.294521	-65355	rs4844588
1	207259285	CD55	chr1:207259285:C:A	C	A	2.27393e-06	0.620637	0.118264	0.294521	-62393	rs4844589
1	207261013	CD55	chr1:207261013:A:G	A	G	2.27393e-06	0.620637	0.118264	0.294521	-60665	rs7514661
1	207262382	CD55	chr1:207262382:G:A	G	A	2.27393e-06	0.620637	0.118264	0.294521	-59296	rs6540893
1	207262693	CD55	chr1:207262693:C:T	C	T	2.27393e-06	0.620637	0.118264	0.294521	-58985	rs1583091
1	207263378	CD55	chr1:207263378:T:C	T	C	2.27393e-06	0.620637	0.118264	0.294521	-58300	rs61822674
1	207264783	CD55	chr1:207264783:A:T	A	T	2.27393e-06	0.620637	0.118264	0.294521	-56895	rs10442696
1	207264991	CD55	chr1:207264991:C:T	C	T	2.27393e-06	0.620637	0.118264	0.294521	-56687	rs7535532
1	207265351	CD55	chr1:207265351:T:C	T	C	2.27393e-06	0.620637	0.118264	0.294521	-56327	rs7543117
1	207265670	CD55	chr1:207265670:C:T	C	T	2.27393e-06	0.620637	0.118264	0.294521	-56008	rs6684804
1	207268263	CD55	chr1:207268263:G:A	G	A	2.27393e-06	0.620637	0.118264	0.294521	-53415	rs11582249
1	20729889	KIF17	chr1:20729889:T:C	T	C	1.35552e-05	0.790043	0.166162	0.328767	11882	rs10916855
1	20765368	KIF17	chr1:20765368:G:T	G	T	3.031e-06	0.816431	0.157931	0.219178	47361	rs1985278
1	20801927	KIF17	chr1:20801927:C:T	C	T	1.77433e-06	0.826292	0.155457	0.267123	83920	rs3121071
1	20819929	KIF17	chr1:20819929:G:A	G	A	1.09184e-06	0.827971	0.152022	0.253425	101922	rs2100382
1	20838683	KIF17	chr1:20838683:A:G	A	G	1.77433e-06	0.826292	0.155457	0.267123	120676	rs4654875
1	20844318	KIF17	chr1:20844318:T:C	T	C	9.68126e-07	0.835306	0.152463	0.260274	126311	rs12042978
1	20864019	KIF17	chr1:20864019:A:C	A	C	2.1263e-06	0.815171	0.154795	0.260274	146012	rs6695218
1	20864937	KIF17	chr1:20864937:A:G	A	G	2.1263e-06	0.815171	0.154795	0.260274	146930	rs3816455
1	20873481	KIF17	chr1:20873481:T:G	T	G	1.09184e-06	0.827971	0.152022	0.253425	155474	rs10916891
1	20882214	KIF17	chr1:20882214:C:A	C	A	5.47795e-06	0.82106	0.163983	0.253425	164207	rs9660908
1	20914939	KIF17	chr1:20914939:G:C	G	C	9.68126e-07	0.835306	0.152463	0.260274	196932	rs6699704
1	20928100	KIF17	chr1:20928100:T:G	T	G	9.68126e-07	0.835306	0.152463	0.260274	210093	rs17450586
1	20937815	KIF17	chr1:20937815:T:C	T	C	1.77433e-06	0.826292	0.155457	0.267123	219808	rs17450813
1	20948178	KIF17	chr1:20948178:T:G	T	G	2.1263e-06	0.815171	0.154795	0.260274	230171	rs10799673
1	20951218	KIF17	chr1:20951218:C:T	C	T	9.68126e-07	0.835306	0.152463	0.260274	233211	rs1453265
1	20979103	KIF17	chr1:20979103:G:C	G	C	9.68126e-07	0.835306	0.152463	0.260274	261096	rs4654893
1	20979668	KIF17	chr1:20979668:T:C	T	C	9.68126e-07	0.835306	0.152463	0.260274	261661	rs12021529
1	20983599	KIF17	chr1:20983599:T:C	T	C	1.77433e-06	0.826292	0.155457	0.267123	265592	rs7540023
1	20990130	KIF17	chr1:20990130:T:C	T	C	1.32307e-06	0.829262	0.15372	0.267123	272123	rs12026318
1	20990289	KIF17	chr1:20990289:C:T	C	T	1.33971e-06	0.827732	0.153532	0.260274	272282	rs34740989
1	20998267	KIF17	chr1:20998267:G:A	G	A	1.09184e-06	0.827971	0.152022	0.253425	280260	rs906254
1	21017441	KIF17	chr1:21017441:A:T	A	T	1.09184e-06	0.827971	0.152022	0.253425	299434	rs2874366
1	21024198	KIF17	chr1:21024198:G:A	G	A	2.1263e-06	0.815171	0.154795	0.260274	306191	rs34602121
1	21034688	KIF17	chr1:21034688:C:T	C	T	9.68126e-07	0.835306	0.152463	0.260274	316681	rs10799680
1	21035885	KIF17	chr1:21035885:G:A	G	A	1.09184e-06	0.827971	0.152022	0.253425	317878	rs6685914
1	21048670	KIF17	chr1:21048670:T:G	T	G	9.68126e-07	0.835306	0.152463	0.260274	330663	rs964466
1	21068640	KIF17	chr1:21068640:C:T	C	T	2.1263e-06	0.815171	0.154795	0.260274	350633	rs12567861
1	21068864	KIF17	chr1:21068864:T:C	T	C	1.77433e-06	0.826292	0.155457	0.267123	350857	rs10916930
1	21078160	KIF17	chr1:21078160:G:A	G	A	2.1263e-06	0.815171	0.154795	0.260274	360153	rs1567128
1	21085755	KIF17	chr1:21085755:G:A	G	A	2.1263e-06	0.815171	0.154795	0.260274	367748	rs10753510
1	21088426	KIF17	chr1:21088426:T:A	T	A	1.09184e-06	0.827971	0.152022	0.253425	370419	rs12134838
1	21095528	KIF17	chr1:21095528:G:C	G	C	9.68126e-07	0.835306	0.152463	0.260274	377521	rs4654900
1	21097537	KIF17	chr1:21097537:G:C	G	C	2.1263e-06	0.815171	0.154795	0.260274	379530	rs10799682
1	21105619	KIF17	chr1:21105619:T:C	T	C	1.77433e-06	0.826292	0.155457	0.267123	387612	rs10916935
1	21109888	KIF17	chr1:21109888:G:A	G	A	2.1263e-06	0.815171	0.154795	0.260274	391881	rs11577267
1	21134877	KIF17	chr1:21134877:T:C	T	C	1.77433e-06	0.826292	0.155457	0.267123	416870	rs4537519
1	21166038	KIF17	chr1:21166038:T:C	T	C	1.77433e-06	0.826292	0.155457	0.267123	448031	rs10753514
1	21180437	KIF17	chr1:21180437:C:T	C	T	8.84243e-06	0.755664	0.155033	0.273973	462430	rs4060971
1	21183149	KIF17	chr1:21183149:A:T	A	T	8.84243e-06	0.755664	0.155033	0.273973	465142	rs4654906
1	21187190	KIF17	chr1:21187190:A:G	A	G	8.84243e-06	0.755664	0.155033	0.273973	469183	rs9426738
1	21189174	KIF17	chr1:21189174:G:A	G	A	8.84243e-06	0.755664	0.155033	0.273973	471167	rs6661993
1	21193956	KIF17	chr1:21193956:A:G	A	G	2.1263e-06	0.815171	0.154795	0.260274	475949	rs9426660
1	21194013	KIF17	chr1:21194013:T:C	T	C	2.1263e-06	0.815171	0.154795	0.260274	476006	rs9426661
1	21197804	KIF17	chr1:21197804:C:G	C	G	1.07388e-05	0.742934	0.154137	0.267123	479797	rs7551785
1	21432527	NBPF3	chr1:21432527:G:A	G	A	3.45868e-10	-0.900184	0.119195	0.383562	-7610	rs10916988
1	21433346	NBPF3	chr1:21433346:T:G	T	G	8.19039e-07	-0.872403	0.157939	0.171233	-6791	rs12759170
1	21433634	NBPF3	chr1:21433634:G:A	G	A	8.19039e-07	-0.872403	0.157939	0.171233	-6503	rs12734589
1	21434816	NBPF3	chr1:21434816:G:T	G	T	3.1037e-14	0.988317	0.0988314	0.486301	-5321	rs4079441
1	21436639	NBPF3	chr1:21436639:T:A	T	A	3.65947e-13	-0.989014	0.105889	0.465753	-3498	rs10916990
1	21437815	NBPF3	chr1:21437815:T:C	T	C	1.07396e-10	0.861231	0.109647	0.431507	-2322	rs2316511
1	21438718	NBPF3	chr1:21438718:A:G	A	G	3.1037e-14	0.988317	0.0988314	0.486301	-1419	rs6680628
1	21438775	NBPF3	chr1:21438775:C:G	C	G	1.07396e-10	0.861231	0.109647	0.431507	-1362	rs6668141
1	21439432	NBPF3	chr1:21439432:G:T	G	T	3.21894e-10	0.87906	0.116113	0.479452	-705	rs6694671
1	21440112	NBPF3	chr1:21440112:TGCAGGC:T	TGCAGGC	T	1.34732e-07	-0.911619	0.15186	0.191781	-25	rs774858594
1	21440112	NBPF3	chr1:21440112:TGCAGGC:T	TGCAGGC	T	1.34732e-07	-0.911619	0.15186	0.191781	-25	rs66732917
1	21440170	NBPF3	chr1:21440170:G:C	G	C	8.19039e-07	-0.872403	0.157939	0.171233	33	rs1566523
1	21440603	NBPF3	chr1:21440603:G:T	G	T	8.19039e-07	-0.872403	0.157939	0.171233	466	rs4654745
1	21441698	NBPF3	chr1:21441698:G:C	G	C	8.19039e-07	-0.872403	0.157939	0.171233	1561	rs12047493
1	21443542	NBPF3	chr1:21443542:C:T	C	T	8.19039e-07	-0.872403	0.157939	0.171233	3405	rs10916993
1	21444851	NBPF3	chr1:21444851:G:A	G	A	8.19039e-07	-0.872403	0.157939	0.171233	4714	rs3820597
1	21445674	NBPF3	chr1:21445674:C:G	C	G	1.54925e-12	-0.929491	0.103749	0.424658	5537	rs4654746
1	21446869	NBPF3	chr1:21446869:C:G	C	G	4.44867e-14	-0.959702	0.0969101	0.5	6732	rs10799691
1	21449450	NBPF3	chr1:21449450:C:T	C	T	1.47565e-06	-0.767152	0.142988	0.308219	9313	rs10799692
1	21449628	NBPF3	chr1:21449628:G:A	G	A	9.00736e-11	-0.933899	0.118214	0.383562	9491	rs10737456
1	21449899	NBPF3	chr1:21449899:A:C	A	C	9.00736e-11	-0.933899	0.118214	0.383562	9762	rs10737457
1	21450391	NBPF3	chr1:21450391:A:G	A	G	9.00736e-11	-0.933899	0.118214	0.383562	10254	rs6685071
1	21450933	NBPF3	chr1:21450933:A:C	A	C	1.81418e-10	-0.863236	0.111833	0.424658	10796	rs4654747
1	21450959	NBPF3	chr1:21450959:A:G	A	G	9.00736e-11	-0.933899	0.118214	0.383562	10822	rs4654936
1	21451258	NBPF3	chr1:21451258:A:G	A	G	1.81418e-10	-0.863236	0.111833	0.424658	11121	rs4311854
1	21451467	NBPF3	chr1:21451467:C:T	C	T	2.16453e-10	0.884358	0.115251	0.479452	11330	rs10737458
1	21451542	NBPF3	chr1:21451542:A:G	A	G	7.10928e-14	0.96709	0.098914	0.493151	11405	rs4654937
1	21451711	NBPF3	chr1:21451711:T:A	T	A	1.81418e-10	-0.863236	0.111833	0.424658	11574	rs1814736
1	21452472	NBPF3	chr1:21452472:C:T	C	T	9.00736e-11	-0.933899	0.118214	0.383562	12335	rs2016464
1	21452597	NBPF3	chr1:21452597:T:C	T	C	1.07396e-10	0.861231	0.109647	0.431507	12460	rs4399126
1	21452972	NBPF3	chr1:21452972:G:A	G	A	9.00736e-11	-0.933899	0.118214	0.383562	12835	rs2016413
1	21453244	NBPF3	chr1:21453244:C:T	C	T	9.00736e-11	-0.933899	0.118214	0.383562	13107	rs2016203
1	21454158	NBPF3	chr1:21454158:A:G	A	G	1.50708e-11	-0.95543	0.11423	0.342466	14021	rs2010202
1	21454341	NBPF3	chr1:21454341:C:T	C	T	9.00736e-11	-0.933899	0.118214	0.383562	14204	rs10737459
1	21457567	NBPF3	chr1:21457567:G:C	G	C	1.33338e-07	-0.703421	0.117124	0.479452	17430	rs4414015
1	21457576	NBPF3	chr1:21457576:T:G	T	G	1.33338e-07	-0.703421	0.117124	0.479452	17439	rs4417036
1	21457577	NBPF3	chr1:21457577:T:A	T	A	1.33338e-07	-0.703421	0.117124	0.479452	17440	rs4495665
1	21457600	NBPF3	chr1:21457600:G:A	G	A	1.81418e-10	-0.863236	0.111833	0.424658	17463	rs4515756
1	21457806	NBPF3	chr1:21457806:C:G	C	G	1.81418e-10	-0.863236	0.111833	0.424658	17669	rs4385671
1	21458736	NBPF3	chr1:21458736:G:A	G	A	1.81418e-10	-0.863236	0.111833	0.424658	18599	rs6675223
1	21458794	NBPF3	chr1:21458794:T:C	T	C	1.81418e-10	-0.863236	0.111833	0.424658	18657	rs6666997
1	21458996	NBPF3	chr1:21458996:C:A	C	A	1.07396e-10	0.861231	0.109647	0.431507	18859	rs4393124
1	21459047	NBPF3	chr1:21459047:G:A	G	A	1.33338e-07	-0.703421	0.117124	0.479452	18910	rs4430298
1	21459488	NBPF3	chr1:21459488:G:T	G	T	1.81418e-10	-0.863236	0.111833	0.424658	19351	rs4654938
1	21459575	NBPF3	chr1:21459575:C:T	C	T	1.06679e-07	-1.16212	0.191628	0.116438	19438	rs4654748
1	21459758	NBPF3	chr1:21459758:T:C	T	C	1.33338e-07	-0.703421	0.117124	0.479452	19621	rs4654750
1	21460257	NBPF3	chr1:21460257:A:G	A	G	2.3696e-13	0.960012	0.101529	0.472603	20120	rs12738545
1	21460525	NBPF3	chr1:21460525:A:G	A	G	4.74888e-10	-0.847761	0.113485	0.438356	20388	rs2316509
1	21461238	NBPF3	chr1:21461238:A:C	A	C	4.74888e-10	-0.847761	0.113485	0.438356	21101	rs4654939
1	21461941	NBPF3	chr1:21461941:C:T	C	T	4.74888e-10	-0.847761	0.113485	0.438356	21804	rs7545635
1	21462949	NBPF3	chr1:21462949:A:G	A	G	4.74888e-10	-0.847761	0.113485	0.438356	22812	rs6660003
1	21464448	NBPF3	chr1:21464448:A:G	A	G	2.3696e-13	0.960012	0.101529	0.472603	24311	rs6426709
1	21466259	NBPF3	chr1:21466259:T:C	T	C	4.74888e-10	-0.847761	0.113485	0.438356	26122	rs3968525
1	21466260	NBPF3	chr1:21466260:C:T	C	T	4.74888e-10	-0.847761	0.113485	0.438356	26123	rs3968524
1	21468119	NBPF3	chr1:21468119:G:T	G	T	2.3696e-13	0.960012	0.101529	0.472603	27982	rs7541779
1	21468895	NBPF3	chr1:21468895:A:G	A	G	1.12402e-07	-0.942544	0.155774	0.164384	28758	rs1827293
1	21469331	NBPF3	chr1:21469331:T:C	T	C	4.74888e-10	-0.847761	0.113485	0.438356	29194	rs4654752
1	21470123	NBPF3	chr1:21470123:A:G	A	G	4.74888e-10	-0.847761	0.113485	0.438356	29986	rs7537914
1	21470277	NBPF3	chr1:21470277:C:A	C	A	1.12402e-07	-0.942544	0.155774	0.164384	30140	rs6687836
1	21470926	NBPF3	chr1:21470926:T:C	T	C	2.3696e-13	0.960012	0.101529	0.472603	30789	rs4654944
1	21471068	NBPF3	chr1:21471068:TAGTC:T	TAGTC	T	1.12402e-07	-0.942544	0.155774	0.164384	30931	rs10579387
1	21471068	NBPF3	chr1:21471068:TAGTC:T	TAGTC	T	1.12402e-07	-0.942544	0.155774	0.164384	30931	rs71700342
1	21471503	NBPF3	chr1:21471503:G:A	G	A	1.12402e-07	-0.942544	0.155774	0.164384	31366	rs2004380
1	21472373	NBPF3	chr1:21472373:A:G	A	G	2.3696e-13	0.960012	0.101529	0.472603	32236	rs7514120
1	21472996	NBPF3	chr1:21472996:T:C	T	C	2.3696e-13	0.960012	0.101529	0.472603	32859	rs1971327
1	21473330	NBPF3	chr1:21473330:A:G	A	G	4.74888e-10	-0.847761	0.113485	0.438356	33193	rs1971328
1	21473692	NBPF3	chr1:21473692:T:G	T	G	2.3696e-13	0.960012	0.101529	0.472603	33555	rs7520015
1	21473726	NBPF3	chr1:21473726:C:T	C	T	4.74888e-10	-0.847761	0.113485	0.438356	33589	rs10916996
1	21473943	NBPF3	chr1:21473943:C:G	C	G	4.74888e-10	-0.847761	0.113485	0.438356	33806	rs10799694
1	21474623	NBPF3	chr1:21474623:C:T	C	T	2.3696e-13	0.960012	0.101529	0.472603	34486	rs7554122
1	21474853	NBPF3	chr1:21474853:G:A	G	A	2.3696e-13	0.960012	0.101529	0.472603	34716	rs7531217
1	21475345	NBPF3	chr1:21475345:T:C	T	C	4.74888e-10	-0.847761	0.113485	0.438356	35208	rs4654753
1	21475536	NBPF3	chr1:21475536:C:T	C	T	2.3696e-13	0.960012	0.101529	0.472603	35399	rs4654945
1	21475629	NBPF3	chr1:21475629:T:C	T	C	2.3696e-13	0.960012	0.101529	0.472603	35492	rs4654946
1	21475957	NBPF3	chr1:21475957:C:T	C	T	2.3696e-13	0.960012	0.101529	0.472603	35820	rs6657015
1	21475960	NBPF3	chr1:21475960:A:G	A	G	2.3696e-13	0.960012	0.101529	0.472603	35823	rs6669637
1	21476100	NBPF3	chr1:21476100:C:CT	C	CT	4.74888e-10	-0.847761	0.113485	0.438356	35963	rs138794006
1	21476100	NBPF3	chr1:21476100:C:CT	C	CT	4.74888e-10	-0.847761	0.113485	0.438356	35963	rs147701921
1	21476684	NBPF3	chr1:21476684:A:G	A	G	1.12402e-07	-0.942544	0.155774	0.164384	36547	rs6426713
1	21477171	NBPF3	chr1:21477171:A:G	A	G	4.74888e-10	-0.847761	0.113485	0.438356	37034	rs7527656
1	21477241	NBPF3	chr1:21477241:A:G	A	G	2.3696e-13	0.960012	0.101529	0.472603	37104	rs7527672
1	21478555	NBPF3	chr1:21478555:C:T	C	T	2.3696e-13	0.960012	0.101529	0.472603	38418	rs4654947
1	21479237	NBPF3	chr1:21479237:A:G	A	G	2.3696e-13	0.960012	0.101529	0.472603	39100	rs2316504
1	21479485	NBPF3	chr1:21479485:G:A	G	A	2.3696e-13	0.960012	0.101529	0.472603	39348	rs4654948
1	21479954	NBPF3	chr1:21479954:T:C	T	C	1.12402e-07	-0.942544	0.155774	0.164384	39817	rs3820296
1	21481371	NBPF3	chr1:21481371:A:G	A	G	1.12402e-07	-0.942544	0.155774	0.164384	41234	rs2800938
1	21481387	NBPF3	chr1:21481387:CCTCTGTCT:C	CCTCTGTCT	C	4.74888e-10	-0.847761	0.113485	0.438356	41250	rs564866357
1	21481387	NBPF3	chr1:21481387:CCTCTGTCT:C	CCTCTGTCT	C	4.74888e-10	-0.847761	0.113485	0.438356	41250	rs200166141
1	21486422	NBPF3	chr1:21486422:CTGGA:C	CTGGA	C	2.3696e-13	0.960012	0.101529	0.472603	46285	rs59308746
1	21486422	NBPF3	chr1:21486422:CTGGA:C	CTGGA	C	2.3696e-13	0.960012	0.101529	0.472603	46285	rs67733232
1	21486650	NBPF3	chr1:21486650:C:A	C	A	2.3696e-13	0.960012	0.101529	0.472603	46513	rs2047653
1	21486659	NBPF3	chr1:21486659:T:G	T	G	2.3696e-13	0.960012	0.101529	0.472603	46522	rs2047654
1	21487124	NBPF3	chr1:21487124:C:T	C	T	3.71421e-12	-0.986273	0.11298	0.445205	46987	rs10799696
1	21487694	NBPF3	chr1:21487694:G:A	G	A	2.70814e-13	0.976048	0.103614	0.479452	47557	rs12566538
1	21487767	NBPF3	chr1:21487767:A:C	A	C	4.10795e-13	0.973642	0.104586	0.465753	47630	rs12565696
1	21487897	NBPF3	chr1:21487897:C:A	C	A	2.3696e-13	0.960012	0.101529	0.472603	47760	rs6680125
1	21488186	NBPF3	chr1:21488186:T:C	T	C	1.18357e-11	-0.965252	0.114543	0.452055	48049	rs12729540
1	21490592	NBPF3	chr1:21490592:C:T	C	T	6.41929e-08	-1.31172	0.211645	0.109589	50455	rs1106357
1	21490633	NBPF3	chr1:21490633:G:GGT	G	GGT	6.41929e-08	-1.31172	0.211645	0.109589	50496	rs71016915
1	21490633	NBPF3	chr1:21490633:G:GGT	G	GGT	6.41929e-08	-1.31172	0.211645	0.109589	50496	rs80212518
1	21492666	NBPF3	chr1:21492666:GT:G	GT	G	6.41929e-08	-1.31172	0.211645	0.109589	52529	rs34449313
1	21492666	NBPF3	chr1:21492666:GT:G	GT	G	6.41929e-08	-1.31172	0.211645	0.109589	52529	rs398073825
1	21492666	NBPF3	chr1:21492666:GT:G	GT	G	6.41929e-08	-1.31172	0.211645	0.109589	52529	rs397979528
1	21494468	NBPF3	chr1:21494468:C:T	C	T	3.60052e-06	-0.826591	0.161367	0.184931	54331	rs10799699
1	21494475	NBPF3	chr1:21494475:G:C	G	C	3.60052e-06	-0.826591	0.161367	0.184931	54338	rs10799700
1	21494497	NBPF3	chr1:21494497:A:G	A	G	3.60052e-06	-0.826591	0.161367	0.184931	54360	rs10799701
1	21495264	NBPF3	chr1:21495264:A:G	A	G	1.36167e-07	-0.891674	0.148606	0.212329	55127	rs1780324
1	21495404	NBPF3	chr1:21495404:T:C	T	C	1.36167e-07	-0.891674	0.148606	0.212329	55267	rs1697422
1	21496583	NBPF3	chr1:21496583:T:C	T	C	2.50457e-06	-0.846023	0.162024	0.178082	56446	rs1780322
1	223674085	CAPN2	chr1:223674085:T:G	T	G	1.81363e-06	-0.891239	0.167863	0.10274	-38454	rs12077854
1	223674365	CAPN2	chr1:223674365:T:C	T	C	8.56832e-06	-0.836744	0.171359	0.109589	-38174	rs4353056
1	223674560	CAPN2	chr1:223674560:A:G	A	G	8.56832e-06	-0.836744	0.171359	0.109589	-37979	rs4292920
1	223674964	CAPN2	chr1:223674964:G:T	G	T	1.81363e-06	-0.891239	0.167863	0.10274	-37575	rs9887844
1	223675565	CAPN2	chr1:223675565:T:C	T	C	1.81363e-06	-0.891239	0.167863	0.10274	-36974	rs9887783
1	223675950	CAPN2	chr1:223675950:T:G	T	G	8.56832e-06	-0.836744	0.171359	0.109589	-36589	rs4653517
1	223676117	CAPN2	chr1:223676117:G:A	G	A	1.81363e-06	-0.891239	0.167863	0.10274	-36422	rs4653861
1	223678153	CAPN2	chr1:223678153:GC:G	GC	G	8.56832e-06	-0.836744	0.171359	0.109589	-34386	rs796325746
1	223678153	CAPN2	chr1:223678153:GC:G	GC	G	8.56832e-06	-0.836744	0.171359	0.109589	-34386	rs57040539
1	223678449	CAPN2	chr1:223678449:G:T	G	T	8.56832e-06	-0.836744	0.171359	0.109589	-34090	rs113489134
1	223679028	CAPN2	chr1:223679028:C:G	C	G	1.81363e-06	-0.891239	0.167863	0.10274	-33511	rs12094675
1	223681904	CAPN2	chr1:223681904:C:T	C	T	1.81363e-06	-0.891239	0.167863	0.10274	-30635	rs77845032
1	223683131	CAPN2	chr1:223683131:G:A	G	A	8.56832e-06	-0.836744	0.171359	0.109589	-29408	rs60126063
1	223684792	CAPN2	chr1:223684792:T:G	T	G	8.56832e-06	-0.836744	0.171359	0.109589	-27747	rs10495214
1	223685294	CAPN2	chr1:223685294:C:T	C	T	1.81363e-06	-0.891239	0.167863	0.10274	-27245	rs79242170
1	223686739	CAPN2	chr1:223686739:A:C	A	C	8.56832e-06	-0.836744	0.171359	0.109589	-25800	rs1539705
1	223697891	CAPN2	chr1:223697891:G:A	G	A	8.72662e-07	-0.724379	0.131546	0.171233	-14648	rs10916576
1	223701843	CAPN2	chr1:223701843:C:A	C	A	1.16425e-07	-0.752567	0.124567	0.171233	-10696	rs75663507
1	223703274	CAPN2	chr1:223703274:T:C	T	C	8.10357e-07	-0.738951	0.13371	0.157534	-9265	rs78721184
1	223704636	CAPN2	chr1:223704636:T:C	T	C	4.04014e-07	-0.640428	0.112112	0.315068	-7903	rs4653500
1	223705001	CAPN2	chr1:223705001:T:C	T	C	4.65651e-06	-0.580312	0.114873	0.267123	-7538	rs4653499
1	223705226	CAPN2	chr1:223705226:G:C	G	C	8.10357e-07	-0.738951	0.13371	0.157534	-7313	rs2000320
1	223705946	CAPN2	chr1:223705946:ATAGT:A	ATAGT	A	2.15174e-07	-0.663571	0.112862	0.308219	-6593	rs71830632
1	223705946	CAPN2	chr1:223705946:ATAGT:A	ATAGT	A	2.15174e-07	-0.663571	0.112862	0.308219	-6593	rs563003540
1	223707187	CAPN2	chr1:223707187:A:G	A	G	2.15174e-07	-0.663571	0.112862	0.308219	-5352	rs7555491
1	223707414	CAPN2	chr1:223707414:A:G	A	G	2.15174e-07	-0.663571	0.112862	0.308219	-5125	rs1892077
1	223707857	CAPN2	chr1:223707857:G:A	G	A	1.69563e-06	-0.597459	0.112145	0.328767	-4682	rs10916598
1	223708091	CAPN2	chr1:223708091:A:G	A	G	2.36194e-07	-0.738469	0.126129	0.19863	-4448	rs12057708
1	223708240	CAPN2	chr1:223708240:C:T	C	T	2.15174e-07	-0.663571	0.112862	0.308219	-4299	rs61823966
1	223708737	CAPN2	chr1:223708737:C:T	C	T	2.15174e-07	-0.663571	0.112862	0.308219	-3802	rs12074091
1	223709310	CAPN2	chr1:223709310:C:T	C	T	1.69563e-06	-0.597459	0.112145	0.328767	-3229	rs10916600
1	223709714	CAPN2	chr1:223709714:G:A	G	A	2.15174e-07	-0.663571	0.112862	0.308219	-2825	rs10916601
1	223709723	CAPN2	chr1:223709723:G:A	G	A	2.15174e-07	-0.663571	0.112862	0.308219	-2816	rs10916602
1	223710314	CAPN2	chr1:223710314:A:C	A	C	1.44817e-05	-0.539621	0.113939	0.363014	-2225	rs10916603
1	223711421	CAPN2	chr1:223711421:T:A	T	A	1.44817e-05	-0.539621	0.113939	0.363014	-1118	rs7412088
1	223711715	CAPN2	chr1:223711715:T:A	T	A	1.44817e-05	-0.539621	0.113939	0.363014	-824	rs1892076
1	223712428	CAPN2	chr1:223712428:A:C	A	C	9.76595e-06	-0.600685	0.123942	0.260274	-111	rs2154114
1	223713117	CAPN2	chr1:223713117:A:G	A	G	2.81067e-07	-0.711059	0.122411	0.226027	578	rs7366009
1	223713490	CAPN2	chr1:223713490:A:T	A	T	2.81067e-07	-0.711059	0.122411	0.226027	951	rs571456998
1	223713795	CAPN2	chr1:223713795:A:G	A	G	1.107e-05	-0.551391	0.114599	0.356164	1256	rs7414311
1	223713843	CAPN2	chr1:223713843:T:C	T	C	1.107e-05	-0.551391	0.114599	0.356164	1304	rs2186006
1	223713958	CAPN2	chr1:223713958:T:C	T	C	2.81067e-07	-0.711059	0.122411	0.226027	1419	rs2154113
1	223714342	CAPN2	chr1:223714342:T:C	T	C	2.81067e-07	-0.711059	0.122411	0.226027	1803	rs75272926
1	223714494	CAPN2	chr1:223714494:G:A	G	A	2.81067e-07	-0.711059	0.122411	0.226027	1955	rs79920112
1	223715271	CAPN2	chr1:223715271:A:C	A	C	2.81067e-07	-0.711059	0.122411	0.226027	2732	rs28370012
1	223715310	CAPN2	chr1:223715310:A:G	A	G	2.81067e-07	-0.711059	0.122411	0.226027	2771	rs28370013
1	223715465	CAPN2	chr1:223715465:A:G	A	G	1.107e-05	-0.551391	0.114599	0.356164	2926	rs28370014
1	223716224	CAPN2	chr1:223716224:C:T	C	T	4.96063e-08	-0.746116	0.119089	0.219178	3685	rs16842040
1	223716904	CAPN2	chr1:223716904:G:A	G	A	4.72555e-08	-0.723794	0.115293	0.232877	4365	rs28370020
1	223718131	CAPN2	chr1:223718131:C:T	C	T	8.25667e-08	-0.719822	0.117393	0.212329	5592	rs12080565
1	223718607	CAPN2	chr1:223718607:T:C	T	C	2.1491e-06	-0.573391	0.108942	0.335616	6068	rs6669046
1	223718695	CAPN2	chr1:223718695:A:G	A	G	2.1491e-06	-0.573391	0.108942	0.335616	6156	rs6674733
1	223718719	CAPN2	chr1:223718719:G:A	G	A	2.60605e-06	-0.555149	0.106539	0.363014	6180	rs6683379
1	223718938	CAPN2	chr1:223718938:G:A	G	A	9.40622e-09	-0.749877	0.111955	0.219178	6399	rs11580689
1	223719275	CAPN2	chr1:223719275:A:G	A	G	9.40622e-09	-0.749877	0.111955	0.219178	6736	rs11579787
1	223719836	CAPN2	chr1:223719836:G:A	G	A	6.64011e-08	-0.747672	0.120809	0.212329	7297	rs28370029
1	223720365	CAPN2	chr1:223720365:G:T	G	T	8.57718e-08	-0.729676	0.119194	0.19863	7826	rs11581716
1	223721078	CAPN2	chr1:223721078:C:T	C	T	9.40622e-09	-0.749877	0.111955	0.219178	8539	rs16842062
1	223721291	CAPN2	chr1:223721291:G:A	G	A	8.57718e-08	-0.729676	0.119194	0.19863	8752	rs78040530
1	223725204	CAPN2	chr1:223725204:C:T	C	T	2.16985e-05	-0.579958	0.125486	0.191781	12665	rs11588475
1	224350629	CNIH4	chr1:224350629:G:A	G	A	1.98447e-05	0.608057	0.130848	0.410959	-6250	rs6676094
1	224356827	CNIH4	chr1:224356827:A:G	A	G	2.1033e-08	0.751006	0.115736	0.431507	-52	rs7517754
1	224357708	CNIH4	chr1:224357708:T:C	T	C	2.52778e-07	0.669355	0.114677	0.472603	829	rs11803981
1	224358082	CNIH4	chr1:224358082:T:C	T	C	8.55349e-07	0.656702	0.11914	0.465753	1203	rs6671751
1	224359490	CNIH4	chr1:224359490:G:A	G	A	8.55349e-07	0.656702	0.11914	0.465753	2611	rs11579952
1	224359817	CNIH4	chr1:224359817:G:C	G	C	8.55349e-07	0.656702	0.11914	0.465753	2938	rs67065875
1	224361822	CNIH4	chr1:224361822:T:C	T	C	8.55349e-07	0.656702	0.11914	0.465753	4943	rs7519734
1	224365169	CNIH4	chr1:224365169:A:T	A	T	9.08628e-09	0.810358	0.120822	0.40411	8290	rs7529067
1	224371110	CNIH4	chr1:224371110:C:G	C	G	9.08628e-09	0.810358	0.120822	0.40411	14231	rs10799569
1	224372669	CNIH4	chr1:224372669:A:G	A	G	8.55349e-07	0.656702	0.11914	0.465753	15790	rs11807942
1	224374708	CNIH4	chr1:224374708:T:C	T	C	8.55349e-07	0.656702	0.11914	0.465753	17829	rs35031726
1	224377476	CNIH4	chr1:224377476:C:T	C	T	8.55349e-07	0.656702	0.11914	0.465753	20597	rs6693287
1	224379302	CNIH4	chr1:224379302:G:A	G	A	9.08628e-09	0.810358	0.120822	0.40411	22423	rs4654037
1	224382219	CNIH4	chr1:224382219:C:T	C	T	9.08628e-09	0.810358	0.120822	0.40411	25340	rs1539207
1	224382474	CNIH4	chr1:224382474:G:A	G	A	8.55349e-07	0.656702	0.11914	0.465753	25595	rs36138926
1	224383280	CNIH4	chr1:224383280:C:G	C	G	9.08628e-09	0.810358	0.120822	0.40411	26401	rs10753465
1	224383676	CNIH4	chr1:224383676:T:G	T	G	9.08628e-09	0.810358	0.120822	0.40411	26797	rs10916607
1	224383819	CNIH4	chr1:224383819:TTTTA:T	TTTTA	T	9.08628e-09	0.810358	0.120822	0.40411	26940	rs540594659
1	224383819	CNIH4	chr1:224383819:TTTTA:T	TTTTA	T	9.08628e-09	0.810358	0.120822	0.40411	26940	rs147435830
1	224384132	CNIH4	chr1:224384132:T:A	T	A	9.08628e-09	0.810358	0.120822	0.40411	27253	rs4653585
1	224384768	CNIH4	chr1:224384768:G:A	G	A	9.08628e-09	0.810358	0.120822	0.40411	27889	rs6672859
1	224385899	CNIH4	chr1:224385899:C:T	C	T	8.55349e-07	0.656702	0.11914	0.465753	29020	rs12745610
1	224390240	CNIH4	chr1:224390240:T:C	T	C	7.06385e-06	0.60469	0.12249	0.5	33361	rs10128058
1	224390257	CNIH4	chr1:224390257:C:T	C	T	7.06385e-06	0.60469	0.12249	0.5	33378	rs10127953
1	224390453	CNIH4	chr1:224390453:G:A	G	A	8.55349e-07	0.656702	0.11914	0.465753	33574	rs10127813
1	224391241	CNIH4	chr1:224391241:C:T	C	T	7.06385e-06	0.60469	0.12249	0.5	34362	rs11811053
1	224391346	CNIH4	chr1:224391346:A:G	A	G	9.08628e-09	0.810358	0.120822	0.40411	34467	rs12048758
1	224394567	CNIH4	chr1:224394567:A:G	A	G	7.06385e-06	0.60469	0.12249	0.5	37688	rs35972228
1	224396224	CNIH4	chr1:224396224:T:C	T	C	9.08628e-09	0.810358	0.120822	0.40411	39345	rs10753466
1	224396686	CNIH4	chr1:224396686:C:T	C	T	7.06385e-06	0.60469	0.12249	0.5	39807	rs7512431
1	224397021	CNIH4	chr1:224397021:A:T	A	T	7.06385e-06	0.60469	0.12249	0.5	40142	rs12755816
1	224398256	CNIH4	chr1:224398256:A:C	A	C	7.06385e-06	0.60469	0.12249	0.5	41377	rs7522956
1	224400671	CNIH4	chr1:224400671:G:A	G	A	8.55349e-07	0.656702	0.11914	0.465753	43792	rs35169600
1	224401123	CNIH4	chr1:224401123:T:A	T	A	8.55349e-07	0.656702	0.11914	0.465753	44244	rs7518109
1	224402199	CNIH4	chr1:224402199:C:T	C	T	7.06385e-06	0.60469	0.12249	0.5	45320	rs7514284
1	224402880	CNIH4	chr1:224402880:T:C	T	C	9.08628e-09	0.810358	0.120822	0.40411	46001	rs6426121
1	224408082	CNIH4	chr1:224408082:A:G	A	G	7.06385e-06	0.60469	0.12249	0.5	51203	rs11801436
1	224409514	CNIH4	chr1:224409514:C:A	C	A	7.06385e-06	0.60469	0.12249	0.5	52635	rs11801645
1	224414541	CNIH4	chr1:224414541:G:T	G	T	7.06385e-06	0.60469	0.12249	0.5	57662	rs7527044
1	224414867	CNIH4	chr1:224414867:A:C	A	C	9.08628e-09	0.810358	0.120822	0.40411	57988	rs10916614
1	224418011	CNIH4	chr1:224418011:G:A	G	A	8.55349e-07	0.656702	0.11914	0.465753	61132	rs12751161
1	224418123	CNIH4	chr1:224418123:A:T	A	T	7.06385e-06	0.60469	0.12249	0.5	61244	rs12739486
1	224418547	CNIH4	chr1:224418547:C:G	C	G	7.06385e-06	0.60469	0.12249	0.5	61668	rs10495219
1	224422315	CNIH4	chr1:224422315:G:C	G	C	7.06385e-06	0.60469	0.12249	0.5	65436	rs12738799
1	224422727	CNIH4	chr1:224422727:G:A	G	A	7.06385e-06	0.60469	0.12249	0.5	65848	rs112503793
1	224432120	CNIH4	chr1:224432120:G:A	G	A	7.06385e-06	0.60469	0.12249	0.5	75241	rs11805973
1	224436689	CNIH4	chr1:224436689:T:C	T	C	9.08628e-09	0.810358	0.120822	0.40411	79810	rs6426123
1	224438409	CNIH4	chr1:224438409:C:G	C	G	1.90651e-06	0.657143	0.124088	0.479452	81530	rs10159333
1	224439084	CNIH4	chr1:224439084:C:T	C	T	1.90651e-06	0.657143	0.124088	0.479452	82205	rs10916616
1	224440478	CNIH4	chr1:224440478:T:G	T	G	1.90651e-06	0.657143	0.124088	0.479452	83599	rs6426125
1	224440806	CNIH4	chr1:224440806:A:T	A	T	9.08628e-09	0.810358	0.120822	0.40411	83927	rs4653587
1	224440942	CNIH4	chr1:224440942:G:A	G	A	1.90651e-06	0.657143	0.124088	0.479452	84063	rs7514575
1	224441797	CNIH4	chr1:224441797:T:A	T	A	1.90651e-06	0.657143	0.124088	0.479452	84918	rs11807763
1	224442000	CNIH4	chr1:224442000:A:G	A	G	1.90651e-06	0.657143	0.124088	0.479452	85121	rs12742989
1	224442342	CNIH4	chr1:224442342:C:G	C	G	9.08628e-09	0.810358	0.120822	0.40411	85463	rs7529310
1	224442993	CNIH4	chr1:224442993:C:T	C	T	1.90651e-06	0.657143	0.124088	0.479452	86114	rs6426126
1	224443698	CNIH4	chr1:224443698:G:T	G	T	1.5745e-06	0.665151	0.124383	0.493151	86819	rs885607
1	224444168	CNIH4	chr1:224444168:G:A	G	A	8.55349e-07	0.656702	0.11914	0.465753	87289	rs885606
1	224445080	CNIH4	chr1:224445080:G:A	G	A	8.55349e-07	0.656702	0.11914	0.465753	88201	rs1544196
1	224449679	CNIH4	chr1:224449679:A:G	A	G	6.03439e-06	0.620981	0.124688	0.486301	92800	rs16848365
1	224451381	CNIH4	chr1:224451381:C:A	C	A	6.23623e-08	0.759406	0.12238	0.410959	94502	rs867362
1	224451875	CNIH4	chr1:224451875:C:T	C	T	6.23623e-08	0.759406	0.12238	0.410959	94996	rs10753467
1	224452445	CNIH4	chr1:224452445:T:C	T	C	6.60138e-06	0.625572	0.12624	0.479452	95566	rs66467176
1	224452913	CNIH4	chr1:224452913:A:G	A	G	4.5418e-06	0.621432	0.122846	0.479452	96034	rs150873275
1	224452977	CNIH4	chr1:224452977:G:A	G	A	4.5418e-06	0.621432	0.122846	0.479452	96098	rs112795740
1	224453165	CNIH4	chr1:224453165:G:A	G	A	4.5418e-06	0.621432	0.122846	0.479452	96286	rs12755338
1	224456358	CNIH4	chr1:224456358:G:A	G	A	1.00112e-05	0.618414	0.127783	0.493151	99479	rs12743200
1	224456465	CNIH4	chr1:224456465:C:T	C	T	1.00112e-05	0.618414	0.127783	0.493151	99586	rs12758579
1	224458626	CNIH4	chr1:224458626:C:T	C	T	1.00112e-05	0.618414	0.127783	0.493151	101747	rs6663522
1	224459191	CNIH4	chr1:224459191:GCTTAGATCAAGT:G	GCTTAGATCAAGT	G	1.26909e-07	0.756518	0.125693	0.417808	102312	rs68180634
1	224459191	CNIH4	chr1:224459191:GCTTAGATCAAGT:G	GCTTAGATCAAGT	G	1.26909e-07	0.756518	0.125693	0.417808	102312	rs67877644
1	224459528	CNIH4	chr1:224459528:T:G	T	G	1.00112e-05	0.618414	0.127783	0.493151	102649	rs35067427
1	224460039	CNIH4	chr1:224460039:T:G	T	G	1.00112e-05	0.618414	0.127783	0.493151	103160	rs2185684
1	224462581	CNIH4	chr1:224462581:G:A	G	A	1.26909e-07	0.756518	0.125693	0.417808	105702	rs9970697
1	224462666	CNIH4	chr1:224462666:G:C	G	C	1.00112e-05	0.618414	0.127783	0.493151	105787	rs11588973
1	224463245	CNIH4	chr1:224463245:T:C	T	C	1.00112e-05	0.618414	0.127783	0.493151	106366	rs12731630
1	224464985	CNIH4	chr1:224464985:A:G	A	G	1.00112e-05	0.618414	0.127783	0.493151	108106	rs11577170
1	224465511	CNIH4	chr1:224465511:A:G	A	G	1.00112e-05	0.618414	0.127783	0.493151	108632	rs11800613
1	224465686	CNIH4	chr1:224465686:C:T	C	T	1.26909e-07	0.756518	0.125693	0.417808	108807	rs10753468
1	224465895	CNIH4	chr1:224465895:T:G	T	G	1.00112e-05	0.618414	0.127783	0.493151	109016	rs12062871
1	224854443	EPHX1	chr1:224854443:G:A	G	A	6.22634e-06	-0.696975	0.140191	0.0821918	-955681	rs113904796
1	224863246	EPHX1	chr1:224863246:T:G	T	G	2.33369e-06	-0.763211	0.145628	0.0753425	-946878	rs78608065
1	224865224	EPHX1	chr1:224865224:GCCCAGC:G	GCCCAGC	G	2.33369e-06	-0.763211	0.145628	0.0753425	-944900	rs542250946
1	224879389	EPHX1	chr1:224879389:T:C	T	C	2.33369e-06	-0.763211	0.145628	0.0753425	-930735	rs113300470
1	224888060	EPHX1	chr1:224888060:A:G	A	G	2.33369e-06	-0.763211	0.145628	0.0753425	-922064	rs111892493
1	224889580	EPHX1	chr1:224889580:G:A	G	A	2.33369e-06	-0.763211	0.145628	0.0753425	-920544	rs113056746
1	224892067	EPHX1	chr1:224892067:C:T	C	T	2.33369e-06	-0.763211	0.145628	0.0753425	-918057	rs115071321
1	224893545	EPHX1	chr1:224893545:C:T	C	T	2.33369e-06	-0.763211	0.145628	0.0753425	-916579	rs113802279
1	224900750	EPHX1	chr1:224900750:T:C	T	C	2.33369e-06	-0.763211	0.145628	0.0753425	-909374	rs112996681
1	224903523	EPHX1	chr1:224903523:A:G	A	G	2.33369e-06	-0.763211	0.145628	0.0753425	-906601	rs112530744
1	224908417	EPHX1	chr1:224908417:C:T	C	T	2.33369e-06	-0.763211	0.145628	0.0753425	-901707	rs115943821
1	224909911	EPHX1	chr1:224909911:C:T	C	T	2.33369e-06	-0.763211	0.145628	0.0753425	-900213	rs112658358
1	224912046	EPHX1	chr1:224912046:T:C	T	C	2.33369e-06	-0.763211	0.145628	0.0753425	-898078	rs112751898
1	224922596	EPHX1	chr1:224922596:T:G	T	G	2.33369e-06	-0.763211	0.145628	0.0753425	-887528	rs113824677
1	224923910	EPHX1	chr1:224923910:C:T	C	T	1.13141e-05	-0.651631	0.135605	0.0890411	-886214	rs78483898
1	226006915	H3-3A	chr1:226006915:A:T	A	T	1.98494e-05	-0.646374	0.139095	0.308219	-55801	rs67269884
1	226008245	H3-3A	chr1:226008245:T:C	T	C	1.98494e-05	-0.646374	0.139095	0.308219	-54471	rs11808474
1	226008546	H3-3A	chr1:226008546:C:T	C	T	1.98494e-05	-0.646374	0.139095	0.308219	-54170	rs113671874
1	226008923	H3-3A	chr1:226008923:A:G	A	G	1.98494e-05	-0.646374	0.139095	0.308219	-53793	rs11586667
1	226009613	H3-3A	chr1:226009613:G:C	G	C	1.98494e-05	-0.646374	0.139095	0.308219	-53103	rs66934363
1	226011608	H3-3A	chr1:226011608:T:C	T	C	1.98494e-05	-0.646374	0.139095	0.308219	-51108	rs66514719
1	226012559	H3-3A	chr1:226012559:A:G	A	G	1.98494e-05	-0.646374	0.139095	0.308219	-50157	rs11809941
1	226014633	H3-3A	chr1:226014633:C:T	C	T	3.61836e-06	-0.648774	0.126687	0.342466	-48083	rs11580276
1	226015352	H3-3A	chr1:226015352:A:G	A	G	1.98494e-05	-0.646374	0.139095	0.308219	-47364	rs11590226
1	226015883	H3-3A	chr1:226015883:G:A	G	A	1.98494e-05	-0.646374	0.139095	0.308219	-46833	rs73100535
1	226017806	H3-3A	chr1:226017806:G:A	G	A	1.98494e-05	-0.646374	0.139095	0.308219	-44910	rs66791434
1	226019023	H3-3A	chr1:226019023:A:C	A	C	9.35671e-06	-0.621595	0.127941	0.349315	-43693	rs34563765
1	226027181	H3-3A	chr1:226027181:A:G	A	G	1.24345e-07	-0.705952	0.117187	0.479452	-35535	rs6682659
1	226028494	H3-3A	chr1:226028494:G:C	G	C	1.42281e-06	-0.66596	0.123899	0.472603	-34222	rs7549940
1	226043093	H3-3A	chr1:226043093:C:T	C	T	7.35377e-08	-0.708642	0.115	0.40411	-19623	rs10157179
1	226043983	H3-3A	chr1:226043983:CTCCT:C	CTCCT	C	7.35377e-08	-0.708642	0.115	0.40411	-18733	rs139760080
1	226043983	H3-3A	chr1:226043983:CTCCT:C	CTCCT	C	7.35377e-08	-0.708642	0.115	0.40411	-18733	rs771398741
1	226043983	H3-3A	chr1:226043983:CTCCT:C	CTCCT	C	7.35377e-08	-0.708642	0.115	0.40411	-18733	rs34527959
1	226043983	H3-3A	chr1:226043983:CTCCT:C	CTCCT	C	7.35377e-08	-0.708642	0.115	0.40411	-18733	rs796533718
1	226043983	H3-3A	chr1:226043983:CTCCT:C	CTCCT	C	7.35377e-08	-0.708642	0.115	0.40411	-18733	rs755309157
1	226046133	H3-3A	chr1:226046133:C:A	C	A	7.35377e-08	-0.708642	0.115	0.40411	-16583	rs10799333
1	226046852	H3-3A	chr1:226046852:A:G	A	G	1.20273e-05	-0.679005	0.141807	0.294521	-15864	rs10915922
1	226050449	H3-3A	chr1:226050449:G:A	G	A	7.35377e-08	-0.708642	0.115	0.40411	-12267	rs4477241
1	226051504	H3-3A	chr1:226051504:C:T	C	T	7.35377e-08	-0.708642	0.115	0.40411	-11212	rs10799334
1	226055071	H3-3A	chr1:226055071:T:C	T	C	7.35377e-08	-0.708642	0.115	0.40411	-7645	rs1877158
1	226057006	H3-3A	chr1:226057006:G:A	G	A	7.35377e-08	-0.708642	0.115	0.40411	-5710	rs6426098
1	226058962	H3-3A	chr1:226058962:G:A	G	A	7.35377e-08	-0.708642	0.115	0.40411	-3754	rs10915927
1	226063418	H3-3A	chr1:226063418:CA:C	CA	C	5.23945e-07	-0.71685	0.12703	0.479452	702	rs398050139
1	226063418	H3-3A	chr1:226063418:CA:C	CA	C	5.23945e-07	-0.71685	0.12703	0.479452	702	rs11321424
1	226066225	H3-3A	chr1:226066225:T:C	T	C	2.17576e-08	0.74654	0.115204	0.486301	3509	rs3768543
1	226070308	H3-3A	chr1:226070308:C:T	C	T	3.05971e-07	0.72164	0.124716	0.486301	7592	rs6678547
1	226070569	H3-3A	chr1:226070569:C:T	C	T	6.10278e-08	0.739607	0.119081	0.479452	7853	rs12096468
1	226070784	H3-3A	chr1:226070784:AAG:A	AAG	A	2.43417e-10	-0.800156	0.104692	0.445205	8068	rs1491578999
1	226070784	H3-3A	chr1:226070784:AAG:A	AAG	A	2.43417e-10	-0.800156	0.104692	0.445205	8068	rs68109929
1	226072106	H3-3A	chr1:226072106:T:G	T	G	6.10278e-08	0.739607	0.119081	0.479452	9390	rs6700189
1	226078328	H3-3A	chr1:226078328:A:G	A	G	2.43417e-10	-0.800156	0.104692	0.445205	15612	rs4271181
1	226078739	H3-3A	chr1:226078739:G:A	G	A	3.75301e-07	-0.798014	0.13922	0.328767	16023	rs10915928
1	226079773	H3-3A	chr1:226079773:T:C	T	C	3.75301e-07	-0.798014	0.13922	0.328767	17057	rs12138509
1	226083078	H3-3A	chr1:226083078:G:A	G	A	1.91325e-05	-0.84131	0.180639	0.232877	20362	rs4570386
1	226083589	H3-3A	chr1:226083589:C:A	C	A	2.43417e-10	-0.800156	0.104692	0.445205	20873	rs10915932
1	226084477	H3-3A	chr1:226084477:G:T	G	T	2.43417e-10	-0.800156	0.104692	0.445205	21761	rs7543135
1	226084651	H3-3A	chr1:226084651:A:G	A	G	2.43417e-10	-0.800156	0.104692	0.445205	21935	rs6679192
1	226090484	H3-3A	chr1:226090484:G:A	G	A	4.15945e-10	-0.765066	0.101947	0.424658	27768	rs6692329
1	226094183	H3-3A	chr1:226094183:G:A	G	A	4.43866e-08	-0.755389	0.120013	0.342466	31467	rs10915934
1	226094554	H3-3A	chr1:226094554:G:A	G	A	4.43866e-08	-0.755389	0.120013	0.342466	31838	rs12026319
1	226096979	H3-3A	chr1:226096979:A:C	A	C	4.43866e-08	-0.755389	0.120013	0.342466	34263	rs12144544
1	226097450	H3-3A	chr1:226097450:G:A	G	A	4.43866e-08	-0.755389	0.120013	0.342466	34734	rs1355391
1	226097516	H3-3A	chr1:226097516:C:A	C	A	3.27729e-07	-0.713658	0.123726	0.335616	34800	rs1355390
1	226097522	H3-3A	chr1:226097522:A:G	A	G	4.43866e-08	-0.755389	0.120013	0.342466	34806	rs1818425
1	226098821	H3-3A	chr1:226098821:T:C	T	C	1.37181e-06	-0.677844	0.12588	0.390411	36105	rs12117683
1	226099431	H3-3A	chr1:226099431:A:G	A	G	5.66939e-08	-0.738124	0.118474	0.383562	36715	rs12117819
1	226099921	H3-3A	chr1:226099921:T:G	T	G	4.21273e-06	-0.686493	0.135154	0.410959	37205	rs11577282
1	226102974	H3-3A	chr1:226102974:A:G	A	G	1.66663e-05	-0.701651	0.149401	0.349315	40258	rs12121071
1	226789924	PSEN2	chr1:226789924:A:T	A	T	9.52951e-06	0.824609	0.169906	0.226027	-80692	rs61835652
1	226800274	PSEN2	chr1:226800274:C:A	C	A	3.06926e-06	-0.803288	0.155492	0.342466	-70342	rs6689397
1	226802560	PSEN2	chr1:226802560:A:C	A	C	3.05872e-08	0.854899	0.133757	0.39726	-68056	rs6426541
1	226804195	PSEN2	chr1:226804195:TTA:T	TTA	T	6.43261e-06	-0.780805	0.157339	0.472603	-66421	rs66526104
1	226804195	PSEN2	chr1:226804195:TTA:T	TTA	T	6.43261e-06	-0.780805	0.157339	0.472603	-66421	rs34820130
1	226804195	PSEN2	chr1:226804195:TTA:T	TTA	T	6.43261e-06	-0.780805	0.157339	0.472603	-66421	rs745387415
1	226812310	PSEN2	chr1:226812310:C:G	C	G	1.12633e-06	0.722457	0.132853	0.465753	-58306	rs7518926
1	226816666	PSEN2	chr1:226816666:A:G	A	G	1.12633e-06	0.722457	0.132853	0.465753	-53950	rs6426547
1	226819481	PSEN2	chr1:226819481:A:G	A	G	5.71915e-07	0.732135	0.130278	0.472603	-51135	rs6674701
1	226823029	PSEN2	chr1:226823029:A:T	A	T	5.71915e-07	0.732135	0.130278	0.472603	-47587	rs6688068
1	226826177	PSEN2	chr1:226826177:C:T	C	T	5.71915e-07	0.732135	0.130278	0.472603	-44439	rs6426548
1	226826689	PSEN2	chr1:226826689:C:T	C	T	5.71915e-07	0.732135	0.130278	0.472603	-43927	rs7547071
1	226827134	PSEN2	chr1:226827134:C:T	C	T	5.71915e-07	0.732135	0.130278	0.472603	-43482	rs6697001
1	226827497	PSEN2	chr1:226827497:C:T	C	T	5.71915e-07	0.732135	0.130278	0.472603	-43119	rs6697431
1	226831218	PSEN2	chr1:226831218:C:T	C	T	3.05095e-08	0.782995	0.122494	0.465753	-39398	rs6692729
1	226839889	PSEN2	chr1:226839889:A:G	A	G	3.05095e-08	0.782995	0.122494	0.465753	-30727	rs7514364
1	226841044	PSEN2	chr1:226841044:C:G	C	G	1.77273e-05	-0.720289	0.153941	0.328767	-29572	rs6426550
1	226844827	PSEN2	chr1:226844827:A:G	A	G	3.05095e-08	0.782995	0.122494	0.465753	-25789	rs7530245
1	226844970	PSEN2	chr1:226844970:A:G	A	G	6.21554e-08	0.7891	0.127148	0.472603	-25646	rs7530370
1	226848855	PSEN2	chr1:226848855:C:T	C	T	3.05095e-08	0.782995	0.122494	0.465753	-21761	rs12086302
1	226857328	PSEN2	chr1:226857328:A:G	A	G	3.05095e-08	0.782995	0.122494	0.465753	-13288	rs1150900
1	226858287	PSEN2	chr1:226858287:T:TA	T	TA	3.05095e-08	0.782995	0.122494	0.465753	-12329	rs35538885
1	226859548	PSEN2	chr1:226859548:A:G	A	G	7.37701e-08	0.753167	0.122242	0.472603	-11068	rs1150897
1	226861057	PSEN2	chr1:226861057:T:C	T	C	7.37701e-08	0.753167	0.122242	0.472603	-9559	rs1794035
1	226866311	PSEN2	chr1:226866311:T:C	T	C	7.37701e-08	0.753167	0.122242	0.472603	-4305	rs1289396
1	226870643	PSEN2	chr1:226870643:A:G	A	G	7.37701e-08	0.753167	0.122242	0.472603	27	rs12758915
1	226871905	PSEN2	chr1:226871905:C:G	C	G	3.47339e-07	0.722643	0.12562	0.445205	1289	rs1296171
1	226872975	PSEN2	chr1:226872975:T:C	T	C	1.75137e-07	0.743761	0.125341	0.438356	2359	rs1295647
1	226874428	PSEN2	chr1:226874428:C:A	C	A	1.75137e-07	0.743761	0.125341	0.438356	3812	rs2793461
1	226875970	PSEN2	chr1:226875970:T:C	T	C	6.7739e-06	0.711569	0.143802	0.335616	5354	rs2073489
1	226881566	PSEN2	chr1:226881566:A:G	A	G	1.75137e-07	0.743761	0.125341	0.438356	10950	rs1295638
1	226882036	PSEN2	chr1:226882036:C:T	C	T	1.75137e-07	0.743761	0.125341	0.438356	11420	rs6759
1	226882677	PSEN2	chr1:226882677:C:T	C	T	1.75137e-07	0.743761	0.125341	0.438356	12061	rs1295640
1	226882994	PSEN2	chr1:226882994:C:T	C	T	1.75137e-07	0.743761	0.125341	0.438356	12378	rs1295641
1	226883663	PSEN2	chr1:226883663:G:A	G	A	1.75137e-07	0.743761	0.125341	0.438356	13047	rs1295643
1	226883824	PSEN2	chr1:226883824:C:T	C	T	1.75137e-07	0.743761	0.125341	0.438356	13208	rs1046240
1	226891020	PSEN2	chr1:226891020:T:A	T	A	1.48102e-05	0.674318	0.14257	0.410959	20404	rs2236914
1	226891521	PSEN2	chr1:226891521:C:G	C	G	1.48102e-05	0.674318	0.14257	0.410959	20905	rs2236915
1	226892758	PSEN2	chr1:226892758:G:A	G	A	1.48102e-05	0.674318	0.14257	0.410959	22142	rs2855559
1	226893327	PSEN2	chr1:226893327:A:C	A	C	1.48102e-05	0.674318	0.14257	0.410959	22711	rs2855560
1	226896959	PSEN2	chr1:226896959:T:G	T	G	1.45675e-06	0.781486	0.145565	0.273973	26343	rs2802268
1	226897454	PSEN2	chr1:226897454:G:A	G	A	2.80003e-06	0.708933	0.136565	0.321918	26838	rs11802358
1	234006829	COA6	chr1:234006829:T:C	T	C	5.4337e-06	0.642351	0.128233	0.267123	-366627	rs12066608
1	234381848	COA6	chr1:234381848:A:G	A	G	3.71174e-06	-0.591475	0.115656	0.226027	8392	rs10910423
1	234385972	COA6	chr1:234385972:G:T	G	T	1.19662e-06	-0.618185	0.11402	0.253425	12516	rs10752785
1	24509922	RCAN3	chr1:24509922:A:G	A	G	4.36806e-06	0.50482	0.0995824	0.479452	7086	rs120315
1	24511756	RCAN3	chr1:24511756:G:A	G	A	1.42445e-07	0.5996	0.100127	0.356164	8920	rs196401
1	24524385	RCAN3	chr1:24524385:A:G	A	G	2.15021e-08	0.630691	0.0972802	0.363014	21549	rs196410
1	24525939	RCAN3	chr1:24525939:T:C	T	C	4.56525e-08	0.602511	0.095836	0.369863	23103	rs638833
1	24525942	RCAN3	chr1:24525942:T:A	T	A	4.56525e-08	0.602511	0.095836	0.369863	23106	rs638834
1	24526058	RCAN3	chr1:24526058:G:C	G	C	4.56525e-08	0.602511	0.095836	0.369863	23222	rs196412
1	24526427	RCAN3	chr1:24526427:C:T	C	T	4.56525e-08	0.602511	0.095836	0.369863	23591	rs196413
1	24527532	RCAN3	chr1:24527532:T:A	T	A	4.56525e-08	0.602511	0.095836	0.369863	24696	rs110672
1	24527677	RCAN3	chr1:24527677:G:C	G	C	4.56525e-08	0.602511	0.095836	0.369863	24841	rs110673
1	24528703	RCAN3	chr1:24528703:G:T	G	T	4.56525e-08	0.602511	0.095836	0.369863	25867	rs196416
1	24535214	RCAN3	chr1:24535214:G:A	G	A	4.05996e-09	0.6362	0.0919933	0.376712	32378	rs196432
1	24541244	RCAN3	chr1:24541244:G:T	G	T	1.3108e-11	0.687124	0.0817966	0.321918	38408	rs196422
1	24546502	RCAN3	chr1:24546502:GA:G	GA	G	2.3497e-09	0.639514	0.090619	0.376712	43666	rs35470314
1	24546502	RCAN3	chr1:24546502:GA:G	GA	G	2.3497e-09	0.639514	0.090619	0.376712	43666	rs768419355
1	246711300	SCCPDH	chr1:246711300:A:G	A	G	5.52781e-06	-0.677057	0.13529	0.136986	-13109	rs113471757
1	246711377	SCCPDH	chr1:246711377:G:C	G	C	5.52781e-06	-0.677057	0.13529	0.136986	-13032	rs112285710
1	246711447	SCCPDH	chr1:246711447:A:C	A	C	1.13921e-05	-0.666255	0.138704	0.130137	-12962	rs79058169
1	246713611	SCCPDH	chr1:246713611:C:G	C	G	5.52781e-06	-0.677057	0.13529	0.136986	-10798	rs150358834
1	246713736	SCCPDH	chr1:246713736:C:T	C	T	5.52781e-06	-0.677057	0.13529	0.136986	-10673	rs72475074
1	246714016	SCCPDH	chr1:246714016:C:A	C	A	5.52781e-06	-0.677057	0.13529	0.136986	-10393	rs78997010
1	246716016	SCCPDH	chr1:246716016:T:TG	T	TG	5.52781e-06	-0.677057	0.13529	0.136986	-8393	rs201273285
1	246718917	SCCPDH	chr1:246718917:T:C	T	C	5.52781e-06	-0.677057	0.13529	0.136986	-5492	rs138517440
1	246719132	SCCPDH	chr1:246719132:A:G	A	G	5.52781e-06	-0.677057	0.13529	0.136986	-5277	rs144078139
1	246720443	SCCPDH	chr1:246720443:G:T	G	T	5.52781e-06	-0.677057	0.13529	0.136986	-3966	rs75973277
1	246754395	SCCPDH	chr1:246754395:A:C	A	C	7.8198e-07	-0.498404	0.0900284	0.342466	29986	rs74152239
1	25562851	HMGN2	chr1:25562851:CAG:C	CAG	C	4.52011e-08	0.537505	0.0854608	0.349315	-909589	rs10687390
1	25562851	HMGN2	chr1:25562851:CAG:C	CAG	C	4.52011e-08	0.537505	0.0854608	0.349315	-909589	rs398052861
1	25562931	HMGN2	chr1:25562931:C:T	C	T	4.52011e-08	0.537505	0.0854608	0.349315	-909509	rs12096438
1	25563141	HMGN2	chr1:25563141:T:C	T	C	4.52011e-08	0.537505	0.0854608	0.349315	-909299	rs6687605
1	25563181	HMGN2	chr1:25563181:G:A	G	A	9.5393e-08	0.540986	0.0887759	0.342466	-909259	rs6688931
1	25563426	HMGN2	chr1:25563426:T:C	T	C	4.52011e-08	0.537505	0.0854608	0.349315	-909014	rs6701596
1	25563559	HMGN2	chr1:25563559:A:G	A	G	4.52011e-08	0.537505	0.0854608	0.349315	-908881	rs6661159
1	25564344	HMGN2	chr1:25564344:G:A	G	A	4.52011e-08	0.537505	0.0854608	0.349315	-908096	rs4075184
1	25564683	HMGN2	chr1:25564683:G:A	G	A	4.52011e-08	0.537505	0.0854608	0.349315	-907757	rs3856239
1	25565480	HMGN2	chr1:25565480:C:T	C	T	4.52011e-08	0.537505	0.0854608	0.349315	-906960	rs11799800
1	25565807	HMGN2	chr1:25565807:G:T	G	T	4.52011e-08	0.537505	0.0854608	0.349315	-906633	rs4400597
1	25566034	HMGN2	chr1:25566034:T:C	T	C	4.52011e-08	0.537505	0.0854608	0.349315	-906406	rs3856240
1	25566389	HMGN2	chr1:25566389:T:G	T	G	3.423e-09	0.626324	0.0899907	0.267123	-906051	rs3924486
1	25566730	HMGN2	chr1:25566730:G:T	G	T	1.61111e-09	0.61731	0.0862803	0.273973	-905710	rs4523506
1	25566751	HMGN2	chr1:25566751:T:C	T	C	3.423e-09	0.626324	0.0899907	0.267123	-905689	rs4418583
1	25568362	HMGN2	chr1:25568362:G:T	G	T	2.61414e-09	0.61387	0.0873265	0.253425	-904078	rs11563
1	25568747	HMGN2	chr1:25568747:C:T	C	T	1.54047e-08	0.591176	0.0899816	0.260274	-903693	rs7491
1	25568915	HMGN2	chr1:25568915:C:T	C	T	2.24396e-05	0.487292	0.105654	0.321918	-903525	rs3924236
1	25569035	HMGN2	chr1:25569035:G:A	G	A	2.61414e-09	0.61387	0.0873265	0.253425	-903405	rs3924235
1	25569108	HMGN2	chr1:25569108:T:C	T	C	3.15111e-09	0.63188	0.0905106	0.239726	-903332	rs3924234
1	25569530	HMGN2	chr1:25569530:A:G	A	G	7.48609e-09	0.633127	0.0936959	0.232877	-902910	rs11247899
1	25569574	HMGN2	chr1:25569574:T:C	T	C	7.48609e-09	0.633127	0.0936959	0.232877	-902866	rs11247902
1	25570535	HMGN2	chr1:25570535:G:A	G	A	1.71252e-07	0.552675	0.0930458	0.335616	-901905	rs11247942
1	26170160	CNKSR1	chr1:26170160:T:C	T	C	1.14592e-05	0.518971	0.108079	0.465753	-7331	rs7087
1	26171135	CNKSR1	chr1:26171135:C:G	C	G	1.14592e-05	0.518971	0.108079	0.465753	-6356	rs1892494
1	26172079	CNKSR1	chr1:26172079:T:C	T	C	1.14592e-05	0.518971	0.108079	0.465753	-5412	rs2802343
1	26172455	CNKSR1	chr1:26172455:G:C	G	C	1.14592e-05	0.518971	0.108079	0.465753	-5036	rs2783625
1	26174553	CNKSR1	chr1:26174553:A:G	A	G	1.14592e-05	0.518971	0.108079	0.465753	-2938	rs2783626
1	26174658	CNKSR1	chr1:26174658:T:C	T	C	1.14592e-05	0.518971	0.108079	0.465753	-2833	rs2802344
1	26174884	CNKSR1	chr1:26174884:G:A	G	A	1.14592e-05	0.518971	0.108079	0.465753	-2607	rs2783627
1	26175336	CNKSR1	chr1:26175336:A:C	A	C	1.14592e-05	0.518971	0.108079	0.465753	-2155	rs2783628
1	26177705	CNKSR1	chr1:26177705:C:G	C	G	1.14592e-05	0.518971	0.108079	0.465753	214	rs2783707
1	26178206	CNKSR1	chr1:26178206:A:G	A	G	1.14592e-05	0.518971	0.108079	0.465753	715	rs2783706
1	26178250	CNKSR1	chr1:26178250:G:A	G	A	1.11234e-06	-0.571586	0.105044	0.493151	759	rs2783630
1	26178265	CNKSR1	chr1:26178265:G:A	G	A	1.14592e-05	0.518971	0.108079	0.465753	774	rs2783631
1	26178774	CNKSR1	chr1:26178774:A:G	A	G	1.14592e-05	0.518971	0.108079	0.465753	1283	rs2783633
1	26199364	CNKSR1	chr1:26199364:G:A	G	A	1.96532e-06	0.571356	0.108057	0.445205	21873	rs7551751
1	26202630	CNKSR1	chr1:26202630:G:C	G	C	1.51007e-06	0.668155	0.124681	0.424658	25139	rs6691747
1	26215289	CNKSR1	chr1:26215289:C:T	C	T	1.10581e-05	-1.08343	0.225162	0.109589	37798	rs6598944
1	26216323	CNKSR1	chr1:26216323:T:C	T	C	1.10581e-05	-1.08343	0.225162	0.109589	38832	rs4659367
1	26218136	CNKSR1	chr1:26218136:A:G	A	G	1.10581e-05	-1.08343	0.225162	0.109589	40645	rs7544509
1	26218220	CNKSR1	chr1:26218220:C:A	C	A	1.10581e-05	-1.08343	0.225162	0.109589	40729	rs6598945
1	26219455	CNKSR1	chr1:26219455:A:C	A	C	1.10581e-05	-1.08343	0.225162	0.109589	41964	rs6697521
1	26220884	CNKSR1	chr1:26220884:T:C	T	C	1.10581e-05	-1.08343	0.225162	0.109589	43393	rs4659413
1	26221401	CNKSR1	chr1:26221401:T:A	T	A	1.10581e-05	-1.08343	0.225162	0.109589	43910	rs11247875
1	26221634	CNKSR1	chr1:26221634:G:T	G	T	1.10581e-05	-1.08343	0.225162	0.109589	44143	rs11803824
1	26221635	CNKSR1	chr1:26221635:A:T	A	T	1.10581e-05	-1.08343	0.225162	0.109589	44144	rs11805726
1	26225821	CNKSR1	chr1:26225821:A:G	A	G	1.10581e-05	-1.08343	0.225162	0.109589	48330	rs945331
1	26230260	CNKSR1	chr1:26230260:T:C	T	C	1.10581e-05	-1.08343	0.225162	0.109589	52769	rs7523752
1	26232196	CNKSR1	chr1:26232196:T:C	T	C	1.10581e-05	-1.08343	0.225162	0.109589	54705	rs12753928
1	26233560	CNKSR1	chr1:26233560:C:G	C	G	1.10581e-05	-1.08343	0.225162	0.109589	56069	rs6598947
1	26235540	CNKSR1	chr1:26235540:A:G	A	G	1.10581e-05	-1.08343	0.225162	0.109589	58049	rs4329500
1	26239174	CNKSR1	chr1:26239174:G:A	G	A	1.10581e-05	-1.08343	0.225162	0.109589	61683	rs2050475
1	26240194	CNKSR1	chr1:26240194:A:G	A	G	1.10581e-05	-1.08343	0.225162	0.109589	62703	rs6682101
1	26243312	CNKSR1	chr1:26243312:T:G	T	G	4.54875e-08	-0.789313	0.12553	0.294521	65821	rs7533756
1	26243825	CNKSR1	chr1:26243825:G:C	G	C	1.10581e-05	-1.08343	0.225162	0.109589	66334	rs6598949
1	26245320	CNKSR1	chr1:26245320:A:G	A	G	1.10581e-05	-1.08343	0.225162	0.109589	67829	rs4274051
1	26245486	CNKSR1	chr1:26245486:G:A	G	A	1.10581e-05	-1.08343	0.225162	0.109589	67995	rs6669400
1	26247767	CNKSR1	chr1:26247767:A:G	A	G	1.10581e-05	-1.08343	0.225162	0.109589	70276	rs10751734
1	26249204	CNKSR1	chr1:26249204:T:C	T	C	1.10581e-05	-1.08343	0.225162	0.109589	71713	rs4512634
1	26249541	CNKSR1	chr1:26249541:A:G	A	G	1.10581e-05	-1.08343	0.225162	0.109589	72050	rs10902724
1	26252732	CNKSR1	chr1:26252732:C:T	C	T	1.10581e-05	-1.08343	0.225162	0.109589	75241	rs1591467
1	26257190	CNKSR1	chr1:26257190:T:C	T	C	1.10581e-05	-1.08343	0.225162	0.109589	79699	rs7513945
1	26257507	CNKSR1	chr1:26257507:T:C	T	C	1.10581e-05	-1.08343	0.225162	0.109589	80016	rs4659417
1	26260547	CNKSR1	chr1:26260547:A:T	A	T	1.10581e-05	-1.08343	0.225162	0.109589	83056	rs6598950
1	26262882	CNKSR1	chr1:26262882:A:G	A	G	1.10581e-05	-1.08343	0.225162	0.109589	85391	rs6689224
1	26266082	CNKSR1	chr1:26266082:A:G	A	G	1.10581e-05	-1.08343	0.225162	0.109589	88591	rs7552105
1	26270027	CNKSR1	chr1:26270027:T:C	T	C	1.10581e-05	-1.08343	0.225162	0.109589	92536	rs4060115
1	26270944	CNKSR1	chr1:26270944:G:A	G	A	1.10581e-05	-1.08343	0.225162	0.109589	93453	rs4659419
1	26272778	CNKSR1	chr1:26272778:A:G	A	G	1.93482e-05	-1.0985	0.236021	0.10274	95287	rs10794526
1	26273813	CNKSR1	chr1:26273813:T:C	T	C	1.10581e-05	-1.08343	0.225162	0.109589	96322	rs10902729
1	26277502	CNKSR1	chr1:26277502:A:C	A	C	1.10581e-05	-1.08343	0.225162	0.109589	100011	rs3820519
1	26278957	CNKSR1	chr1:26278957:CCTAT:C	CCTAT	C	1.10581e-05	-1.08343	0.225162	0.109589	101466	rs746867068
1	26278957	CNKSR1	chr1:26278957:CCTAT:C	CCTAT	C	1.10581e-05	-1.08343	0.225162	0.109589	101466	rs10560359
1	26278957	CNKSR1	chr1:26278957:CCTAT:C	CCTAT	C	1.10581e-05	-1.08343	0.225162	0.109589	101466	rs72214143
1	26278957	CNKSR1	chr1:26278957:CCTAT:C	CCTAT	C	1.10581e-05	-1.08343	0.225162	0.109589	101466	rs369691529
1	26282816	CNKSR1	chr1:26282816:G:T	G	T	1.10581e-05	-1.08343	0.225162	0.109589	105325	rs6598952
1	26284400	CNKSR1	chr1:26284400:A:C	A	C	1.10581e-05	-1.08343	0.225162	0.109589	106909	rs4332350
1	26285551	CNKSR1	chr1:26285551:A:G	A	G	1.10581e-05	-1.08343	0.225162	0.109589	108060	rs11247898
1	26287213	CNKSR1	chr1:26287213:G:A	G	A	1.22233e-05	-1.10257	0.230485	0.10274	109722	rs12563057
1	26287976	CNKSR1	chr1:26287976:T:C	T	C	1.10581e-05	-1.08343	0.225162	0.109589	110485	rs4659421
1	26288122	CNKSR1	chr1:26288122:T:C	T	C	1.10581e-05	-1.08343	0.225162	0.109589	110631	rs6598953
1	26288360	CNKSR1	chr1:26288360:T:C	T	C	1.10581e-05	-1.08343	0.225162	0.109589	110869	rs6598954
1	26288694	CNKSR1	chr1:26288694:A:G	A	G	1.10581e-05	-1.08343	0.225162	0.109589	111203	rs4659422
1	26290643	CNKSR1	chr1:26290643:C:T	C	T	9.13437e-06	-1.07363	0.220677	0.116438	113152	rs4659368
1	26291087	CNKSR1	chr1:26291087:G:A	G	A	9.13437e-06	-1.07363	0.220677	0.116438	113596	rs6686311
1	26291300	CNKSR1	chr1:26291300:T:C	T	C	9.13437e-06	-1.07363	0.220677	0.116438	113809	rs6657644
1	26291975	CNKSR1	chr1:26291975:T:C	T	C	9.13437e-06	-1.07363	0.220677	0.116438	114484	rs7513861
1	26293498	CNKSR1	chr1:26293498:T:C	T	C	9.13437e-06	-1.07363	0.220677	0.116438	116007	rs10794527
1	26293863	CNKSR1	chr1:26293863:C:T	C	T	9.13437e-06	-1.07363	0.220677	0.116438	116372	rs4659370
1	26293998	CNKSR1	chr1:26293998:T:C	T	C	9.13437e-06	-1.07363	0.220677	0.116438	116507	rs3732416
1	26294355	CNKSR1	chr1:26294355:C:CA	C	CA	9.13437e-06	-1.07363	0.220677	0.116438	116864	rs3832184
1	26294507	CNKSR1	chr1:26294507:A:G	A	G	2.23757e-05	-1.04982	0.22758	0.109589	117016	rs6695643
1	26295217	CNKSR1	chr1:26295217:C:G	C	G	2.23757e-05	-1.04982	0.22758	0.109589	117726	rs11247903
1	26296483	CNKSR1	chr1:26296483:A:C	A	C	9.13437e-06	-1.07363	0.220677	0.116438	118992	rs4659423
1	26296502	CNKSR1	chr1:26296502:C:T	C	T	9.13437e-06	-1.07363	0.220677	0.116438	119011	rs4659424
1	26297836	CNKSR1	chr1:26297836:G:A	G	A	9.13437e-06	-1.07363	0.220677	0.116438	120345	rs4290051
1	26300237	CNKSR1	chr1:26300237:C:T	C	T	9.13437e-06	-1.07363	0.220677	0.116438	122746	rs4659425
1	26300258	CNKSR1	chr1:26300258:T:C	T	C	9.13437e-06	-1.07363	0.220677	0.116438	122767	rs4233459
1	26300792	CNKSR1	chr1:26300792:A:G	A	G	9.13437e-06	-1.07363	0.220677	0.116438	123301	rs4291487
1	26301310	CNKSR1	chr1:26301310:G:A	G	A	9.13437e-06	-1.07363	0.220677	0.116438	123819	rs3821368
1	26304270	CNKSR1	chr1:26304270:G:C	G	C	2.23757e-05	-1.04982	0.22758	0.109589	126779	rs10902736
1	26305153	CNKSR1	chr1:26305153:A:T	A	T	9.13437e-06	-1.07363	0.220677	0.116438	127662	rs11585005
1	26305677	CNKSR1	chr1:26305677:T:TA	T	TA	9.13437e-06	-1.07363	0.220677	0.116438	128186	rs5773155
1	26307507	CNKSR1	chr1:26307507:T:C	T	C	9.13437e-06	-1.07363	0.220677	0.116438	130016	rs6676527
1	26308409	CNKSR1	chr1:26308409:C:T	C	T	9.13437e-06	-1.07363	0.220677	0.116438	130918	rs6598957
1	26309058	CNKSR1	chr1:26309058:A:G	A	G	9.13437e-06	-1.07363	0.220677	0.116438	131567	rs4639748
1	26309517	CNKSR1	chr1:26309517:T:C	T	C	9.13437e-06	-1.07363	0.220677	0.116438	132026	rs11247906
1	26310039	CNKSR1	chr1:26310039:A:T	A	T	9.13437e-06	-1.07363	0.220677	0.116438	132548	rs4529699
1	26310188	CNKSR1	chr1:26310188:A:G	A	G	9.13437e-06	-1.07363	0.220677	0.116438	132697	rs6598958
1	26311376	CNKSR1	chr1:26311376:A:G	A	G	9.13437e-06	-1.07363	0.220677	0.116438	133885	rs6598960
1	26312510	CNKSR1	chr1:26312510:T:C	T	C	9.13437e-06	-1.07363	0.220677	0.116438	135019	rs12137238
1	26315598	CNKSR1	chr1:26315598:C:T	C	T	9.13437e-06	-1.07363	0.220677	0.116438	138107	rs4501829
1	26319494	CNKSR1	chr1:26319494:A:G	A	G	9.13437e-06	-1.07363	0.220677	0.116438	142003	rs12143663
1	26319637	CNKSR1	chr1:26319637:A:G	A	G	9.13437e-06	-1.07363	0.220677	0.116438	142146	rs6696625
1	26321837	CNKSR1	chr1:26321837:G:A	G	A	9.13437e-06	-1.07363	0.220677	0.116438	144346	rs12568163
1	26424492	RPS6KA1	chr1:26424492:A:G	A	G	2.11876e-06	0.688853	0.130784	0.424658	-105269	rs6694351
1	26430996	RPS6KA1	chr1:26430996:T:C	T	C	4.69803e-07	0.780272	0.13756	0.328767	-98765	rs9438547
1	26432282	RPS6KA1	chr1:26432282:G:A	G	A	3.46392e-06	0.685698	0.133586	0.410959	-97479	rs6656196
1	26432658	RPS6KA1	chr1:26432658:A:G	A	G	3.46392e-06	0.685698	0.133586	0.410959	-97103	rs3811461
1	26440876	RPS6KA1	chr1:26440876:C:T	C	T	4.69803e-07	0.780272	0.13756	0.328767	-88885	rs11247958
1	26445967	RPS6KA1	chr1:26445967:G:T	G	T	1.38061e-06	0.708233	0.131565	0.417808	-83794	rs7522551
1	26449784	RPS6KA1	chr1:26449784:CCCCACCTCAGGTAATCCG:C	CCCCACCTCAGGTAATCCG	C	1.38061e-06	0.708233	0.131565	0.417808	-79977	rs139827909
1	26449784	RPS6KA1	chr1:26449784:CCCCACCTCAGGTAATCCG:C	CCCCACCTCAGGTAATCCG	C	1.38061e-06	0.708233	0.131565	0.417808	-79977	rs71775877
1	26449784	RPS6KA1	chr1:26449784:CCCCACCTCAGGTAATCCG:C	CCCCACCTCAGGTAATCCG	C	1.38061e-06	0.708233	0.131565	0.417808	-79977	rs761708602
1	26457276	RPS6KA1	chr1:26457276:T:C	T	C	1.38061e-06	0.708233	0.131565	0.417808	-72485	rs9328728
1	26460136	RPS6KA1	chr1:26460136:G:A	G	A	1.38061e-06	0.708233	0.131565	0.417808	-69625	rs3816539
1	26463296	RPS6KA1	chr1:26463296:T:C	T	C	1.38061e-06	0.708233	0.131565	0.417808	-66465	rs6690458
1	26468227	RPS6KA1	chr1:26468227:TA:T	TA	T	2.11876e-06	0.688853	0.130784	0.424658	-61534	rs10709725
1	26471017	RPS6KA1	chr1:26471017:C:T	C	T	1.38061e-06	0.708233	0.131565	0.417808	-58744	rs2290588
1	26477599	RPS6KA1	chr1:26477599:G:A	G	A	2.43179e-06	0.676019	0.129267	0.424658	-52162	rs4659375
1	26483970	RPS6KA1	chr1:26483970:C:T	C	T	4.69803e-07	0.780272	0.13756	0.328767	-45791	rs7524245
1	26485807	RPS6KA1	chr1:26485807:G:A	G	A	4.69803e-07	0.780272	0.13756	0.328767	-43954	rs12024530
1	26491334	RPS6KA1	chr1:26491334:G:A	G	A	4.69803e-07	0.780272	0.13756	0.328767	-38427	rs10902748
1	26492392	RPS6KA1	chr1:26492392:T:C	T	C	1.38061e-06	0.708233	0.131565	0.417808	-37369	rs61789103
1	26492393	RPS6KA1	chr1:26492393:T:C	T	C	1.38061e-06	0.708233	0.131565	0.417808	-37368	rs2045344
1	26492394	RPS6KA1	chr1:26492394:G:C	G	C	1.38061e-06	0.708233	0.131565	0.417808	-37367	rs61789104
1	26492403	RPS6KA1	chr1:26492403:A:G	A	G	1.38061e-06	0.708233	0.131565	0.417808	-37358	rs2045345
1	26493727	RPS6KA1	chr1:26493727:G:A	G	A	4.69803e-07	0.780272	0.13756	0.328767	-36034	rs7530096
1	26494739	RPS6KA1	chr1:26494739:A:G	A	G	2.43179e-06	0.676019	0.129267	0.424658	-35022	rs6693662
1	26495397	RPS6KA1	chr1:26495397:G:C	G	C	4.69803e-07	0.780272	0.13756	0.328767	-34364	rs11802779
1	26497140	RPS6KA1	chr1:26497140:C:T	C	T	1.38061e-06	0.708233	0.131565	0.417808	-32621	rs4659443
1	26498625	RPS6KA1	chr1:26498625:C:T	C	T	1.38061e-06	0.708233	0.131565	0.417808	-31136	rs4659444
1	26499158	RPS6KA1	chr1:26499158:CCTAT:C	CCTAT	C	1.38061e-06	0.708233	0.131565	0.417808	-30603	rs35412961
1	26499158	RPS6KA1	chr1:26499158:CCTAT:C	CCTAT	C	1.38061e-06	0.708233	0.131565	0.417808	-30603	rs67849345
1	26501691	RPS6KA1	chr1:26501691:A:G	A	G	2.43179e-06	0.676019	0.129267	0.424658	-28070	rs6669111
1	26510576	RPS6KA1	chr1:26510576:C:A	C	A	1.38061e-06	0.708233	0.131565	0.417808	-19185	rs12086684
1	26513087	RPS6KA1	chr1:26513087:C:T	C	T	2.43179e-06	0.676019	0.129267	0.424658	-16674	rs7521032
1	26513177	RPS6KA1	chr1:26513177:A:G	A	G	2.43179e-06	0.676019	0.129267	0.424658	-16584	rs72651526
1	26513419	RPS6KA1	chr1:26513419:T:G	T	G	2.43179e-06	0.676019	0.129267	0.424658	-16342	rs61789119
1	26514335	RPS6KA1	chr1:26514335:G:A	G	A	1.38061e-06	0.708233	0.131565	0.417808	-15426	rs55840663
1	26514413	RPS6KA1	chr1:26514413:C:T	C	T	2.43179e-06	0.676019	0.129267	0.424658	-15348	rs56241541
1	26516729	RPS6KA1	chr1:26516729:T:A	T	A	5.57033e-06	0.667471	0.133431	0.417808	-13032	rs1975798
1	26517704	RPS6KA1	chr1:26517704:G:A	G	A	4.69803e-07	0.780272	0.13756	0.328767	-12057	rs4970498
1	26518875	RPS6KA1	chr1:26518875:A:G	A	G	6.35055e-07	0.776975	0.138949	0.335616	-10886	rs12045800
1	26519704	RPS6KA1	chr1:26519704:C:T	C	T	1.38061e-06	0.708233	0.131565	0.417808	-10057	rs4970514
1	26521149	RPS6KA1	chr1:26521149:C:T	C	T	2.15583e-06	0.673166	0.12792	0.417808	-8612	rs12046497
1	26521463	RPS6KA1	chr1:26521463:C:T	C	T	2.15583e-06	0.673166	0.12792	0.417808	-8298	rs10458599
1	26521895	RPS6KA1	chr1:26521895:C:T	C	T	4.1599e-07	0.775718	0.13598	0.321918	-7866	rs12094989
1	26522821	RPS6KA1	chr1:26522821:G:A	G	A	2.15583e-06	0.673166	0.12792	0.417808	-6940	rs4970466
1	26523415	RPS6KA1	chr1:26523415:T:C	T	C	2.15583e-06	0.673166	0.12792	0.417808	-6346	rs61692526
1	26523482	RPS6KA1	chr1:26523482:T:C	T	C	9.60179e-07	0.78623	0.143447	0.315068	-6279	rs12093376
1	26524174	RPS6KA1	chr1:26524174:C:T	C	T	4.1599e-07	0.775718	0.13598	0.321918	-5587	rs7539320
1	26990697	TRNP1	chr1:26990697:T:C	T	C	1.3772e-06	-0.930207	0.172779	0.0410959	-2995	rs79401282
1	3291811	WRAP73	chr1:3291811:A:G	A	G	2.06379e-06	0.653901	0.12398	0.239726	-358292	rs10909918
1	37486153	GNL2	chr1:37486153:T:C	T	C	6.14882e-06	0.548987	0.110348	0.226027	-109784	rs215206
1	37504431	GNL2	chr1:37504431:T:C	T	C	3.90106e-06	0.455815	0.0893679	0.273973	-91506	rs4535966
1	37505611	GNL2	chr1:37505611:A:G	A	G	3.90106e-06	0.455815	0.0893679	0.273973	-90326	rs4653295
1	37513172	GNL2	chr1:37513172:T:C	T	C	3.90106e-06	0.455815	0.0893679	0.273973	-82765	rs4653296
1	37514332	GNL2	chr1:37514332:A:G	A	G	3.90106e-06	0.455815	0.0893679	0.273973	-81605	rs6426021
1	37522141	GNL2	chr1:37522141:T:C	T	C	1.12036e-05	0.428294	0.0890775	0.273973	-73796	rs4653297
1	37525857	GNL2	chr1:37525857:C:T	C	T	1.34981e-06	0.476372	0.0883934	0.267123	-70080	rs11264067
1	37526058	GNL2	chr1:37526058:C:T	C	T	2.77084e-06	0.474261	0.0913086	0.253425	-69879	rs2019918
1	37532977	GNL2	chr1:37532977:C:G	C	G	1.16753e-06	0.487173	0.089746	0.260274	-62960	rs7534923
1	37542169	GNL2	chr1:37542169:A:G	A	G	1.16753e-06	0.487173	0.089746	0.260274	-53768	rs4652958
1	37545150	GNL2	chr1:37545150:C:T	C	T	3.9549e-06	0.436072	0.0855603	0.273973	-50787	rs6704190
1	37547105	GNL2	chr1:37547105:C:G	C	G	1.16753e-06	0.487173	0.089746	0.260274	-48832	rs6662367
1	37547745	GNL2	chr1:37547745:C:T	C	T	1.16753e-06	0.487173	0.089746	0.260274	-48192	rs7518026
1	37550528	GNL2	chr1:37550528:G:A	G	A	1.16753e-06	0.487173	0.089746	0.260274	-45409	rs4653298
1	37551789	GNL2	chr1:37551789:G:A	G	A	1.16753e-06	0.487173	0.089746	0.260274	-44148	rs6426023
1	37565095	GNL2	chr1:37565095:T:C	T	C	1.16753e-06	0.487173	0.089746	0.260274	-30842	rs6619
1	37567446	GNL2	chr1:37567446:T:G	T	G	2.15693e-07	0.476537	0.0810593	0.287671	-28491	rs2076519
1	37579213	GNL2	chr1:37579213:T:C	T	C	1.16753e-06	0.487173	0.089746	0.260274	-16724	rs3856138
1	37579524	GNL2	chr1:37579524:G:C	G	C	1.96538e-06	0.482353	0.0912248	0.287671	-16413	rs10752599
1	37583772	GNL2	chr1:37583772:C:T	C	T	1.16753e-06	0.487173	0.089746	0.260274	-12165	rs3753372
1	37584307	GNL2	chr1:37584307:G:A	G	A	1.16753e-06	0.487173	0.089746	0.260274	-11630	rs4653303
1	37591215	GNL2	chr1:37591215:T:G	T	G	1.16753e-06	0.487173	0.089746	0.260274	-4722	rs10908359
1	37593092	GNL2	chr1:37593092:T:C	T	C	1.34981e-06	0.476372	0.0883934	0.267123	-2845	rs10908360
1	37618269	GNL2	chr1:37618269:C:G	C	G	1.34981e-06	0.476372	0.0883934	0.267123	22332	rs11264075
1	3804501	CEP104	chr1:3804501:C:T	C	T	7.2975e-07	-0.593381	0.106827	0.253425	-52710	rs12134180
1	3807426	CEP104	chr1:3807426:G:A	G	A	7.2975e-07	-0.593381	0.106827	0.253425	-49785	rs12723501
1	3808321	CEP104	chr1:3808321:G:A	G	A	7.2975e-07	-0.593381	0.106827	0.253425	-48890	rs12728640
1	38996470	NDUFS5	chr1:38996470:CT:C	CT	C	2.34754e-10	-0.671657	0.0877717	0.267123	-29880	rs35363657
1	38999467	NDUFS5	chr1:38999467:A:C	A	C	6.76764e-10	-0.678614	0.0919683	0.260274	-26883	rs11205522
1	39002352	NDUFS5	chr1:39002352:T:C	T	C	2.34754e-10	-0.671657	0.0877717	0.267123	-23998	rs4147758
1	39004692	NDUFS5	chr1:39004692:A:G	A	G	2.34754e-10	-0.671657	0.0877717	0.267123	-21658	rs4147753
1	39008385	NDUFS5	chr1:39008385:A:C	A	C	2.34754e-10	-0.671657	0.0877717	0.267123	-17965	rs4147750
1	39011141	NDUFS5	chr1:39011141:G:A	G	A	2.34754e-10	-0.671657	0.0877717	0.267123	-15209	rs1969857
1	39014867	NDUFS5	chr1:39014867:C:T	C	T	2.34754e-10	-0.671657	0.0877717	0.267123	-11483	rs2377581
1	39017244	NDUFS5	chr1:39017244:CTGTA:C	CTGTA	C	1.29071e-10	-0.634697	0.0812984	0.280822	-9106	rs146087529
[truncated: 29,609 more rows]

## Sheet: Supplemental Table 2
Supplemental Table 2
Enrichment Analysis of African American hepatocyte cis-eQTLs within ChromHMM active regulatory regions
Figure 1C: Adult Liver (E066)
ChromHMM annotation	eQTL count	matched SNP count	p-value	OddsRatio	95% CI lower	95% CI higher	FDR
EnhA1	802	571	3.1202e-10	1.41552	1.2683	1.58055	7.02045e-10
EnhA2	1031	534	1.44958e-37	1.9634	1.76459	2.1865	6.5231e-37
EnhG1	408	471	0.0351019	0.864423	0.754468	0.990059	0.0351019
EnhG2	426	299	2.36984e-06	1.43078	1.2301	1.66591	3.55476e-06
TssA	670	471	2.99513e-09	1.43203	1.26948	1.6164	5.39124e-09
TssFlnk	874	739	0.000715865	1.18809	1.07453	1.3139	0.000805348
TssFlnkD	406	293	1.95979e-05	1.39088	1.19282	1.62336	2.51974e-05
TssFlnkU	979	635	3.77644e-18	1.55976	1.40825	1.72858	1.13293e-17
Tx	3319	2143	8.55922e-63	1.6161	1.52634	1.71141	7.7033e-62
Figure S2A: HepG2 (E118)
ChromHMM annotation	eQTL count	matched SNP count	p-value	OddsRatio	95% CI lower	95% CI higher	FDR
EnhA1	1083	654	1.16911e-25	1.6802	1.5213	1.85683	3.50733e-25
EnhA2	191	157	0.075901	1.21793	0.980301	1.51489	0.0853887
EnhG1	391	340	0.0627354	1.15195	0.992669	1.33732	0.0806599
EnhG2	517	387	1.49333e-05	1.34173	1.17265	1.53617	2.68799e-05
TssA	1414	692	1.17651e-58	2.09429	1.90808	2.3004	1.05885e-57
TssFlnk	648	575	0.037495	1.12972	1.00698	1.26767	0.0562426
TssFlnkD	791	732	0.132247	1.08273	0.97668	1.20048	0.132247
TssFlnkU	428	304	4.55953e-06	1.41371	1.21648	1.64454	1.02589e-05
Tx	1135	658	1.71526e-30	1.75305	1.58892	1.93536	7.71866e-30
Enrichment Analysis of GTEx liver cis-eQTLs within ChromHMM active regulatory regions
Figure S2B: Adult Liver (E066)
ChromHMM annotation	eQTL count	matched SNP count	p-value	OddsRatio	95% CI lower	95% CI higher	FDR
EnhA1	2118	1258	4.47518e-51	1.70338	1.58665	1.82922	1.34255e-50
EnhA2	2036	1180	4.81788e-53	1.74555	1.62273	1.87837	2.16805e-52
EnhG1	1261	1089	0.000375524	1.16063	1.06869	1.26063	0.000375524
EnhG2	938	683	2.07656e-10	1.37805	1.24664	1.52384	2.33613e-10
TssA	1543	1127	4.68319e-16	1.37683	1.27335	1.48913	7.02479e-16
TssFlnk	2176	1609	1.01445e-20	1.36286	1.27615	1.45572	1.82601e-20
TssFlnkD	1065	758	4.93193e-13	1.41081	1.28344	1.55139	6.34105e-13
TssFlnkU	2030	1285	2.50057e-39	1.5958	1.48623	1.71392	5.62628e-39
Tx	6195	4442	8.86393e-70	1.42998	1.37378	1.48855	7.97754e-69
Figure S2C: HepG2 (E118)
ChromHMM annotation	eQTL count	matched SNP count	p-value	OddsRatio	95% CI lower	95% CI higher	FDR
EnhA1	2186	1364	1.42963e-44	1.62063	1.51279	1.73672	6.43335e-44
EnhA2	541	359	1.26765e-09	1.51062	1.31895	1.73177	1.42611e-09
EnhG1	1066	777	1.34832e-11	1.37727	1.25372	1.51356	2.02248e-11
EnhG2	1146	913	2.55952e-07	1.25914	1.15258	1.37584	2.55952e-07
TssA	2412	1484	1.24053e-51	1.646	1.54104	1.75865	1.11648e-50
TssFlnk	1703	1210	2.79294e-20	1.41685	1.31445	1.52756	5.02728e-20
TssFlnkD	2382	1529	1.1407e-43	1.57608	1.4762	1.6831	3.4221e-43
TssFlnkU	1048	776	1.59994e-10	1.35545	1.23342	1.49006	2.05707e-10
Tx	2120	1552	2.28113e-21	1.37657	1.28767	1.47187	5.13254e-21

## Sheet: Supplemental Table 3
Supplemental Table 3
Colocalization Analysis with GTEx-liver eQTLs: 95% credible set
snp	position	SNP.PP.H4	prob	gene_tested
rs16945974	48222691	0.0579829	0.948457	ABCC11
rs11863133	48215814	0.0376919	0.948457	ABCC11
rs11863233	48216100	0.0376919	0.948457	ABCC11
rs11863236	48216115	0.0376919	0.948457	ABCC11
rs11866312	48215938	0.0376919	0.948457	ABCC11
rs28376623	48216310	0.0376919	0.948457	ABCC11
rs28503414	48216931	0.0376919	0.948457	ABCC11
rs28505535	48217224	0.0376919	0.948457	ABCC11
rs28626252	48216336	0.0376919	0.948457	ABCC11
rs28654935	48216307	0.0376919	0.948457	ABCC11
rs28684834	48216918	0.0376919	0.948457	ABCC11
rs28696036	48217461	0.0376919	0.948457	ABCC11
rs73540901	48217564	0.0376919	0.948457	ABCC11
rs73542903	48217967	0.0376919	0.948457	ABCC11
rs73542904	48217990	0.0376919	0.948457	ABCC11
rs74481009	48216650	0.0376919	0.948457	ABCC11
rs16945972	48222573	0.0357051	0.948457	ABCC11
rs113372282	48219772	0.0259684	0.948457	ABCC11
rs13332872	48219810	0.0259684	0.948457	ABCC11
rs13334480	48221224	0.0259684	0.948457	ABCC11
rs13335504	48219062	0.0259684	0.948457	ABCC11
rs28571687	48219239	0.0259684	0.948457	ABCC11
rs28602441	48222171	0.0259684	0.948457	ABCC11
rs76976241	48219670	0.0259684	0.948457	ABCC11
rs9924823	48221778	0.0259684	0.948457	ABCC11
rs9927515	48219932	0.0259684	0.948457	ABCC11
rs9927756	48220201	0.0259684	0.948457	ABCC11
rs9935854	48220225	0.0259684	0.948457	ABCC11
rs9939742	48220075	0.0259684	0.948457	ABCC11
rs11626972	73566890	0.772358	0.866491	ACOT2
rs58231493	73565418	0.227642	0.866491	ACOT2
rs11657440	81513660	0.763208	0.998663	ACTG1
rs10153315	81514746	0.235147	0.998663	ACTG1
rs6794006	53899431	0.821497	0.970269	ACTR8
rs45511795	53872864	0.0344043	0.970269	ACTR8
rs2304575	53892083	0.020144	0.970269	ACTR8
rs57398949	53899584	0.020144	0.970269	ACTR8
rs9880056	53900959	0.020144	0.970269	ACTR8
rs1020082	53886995	0.0179431	0.970269	ACTR8
rs3217445	53892066	0.012442	0.970269	ACTR8
rs6445612	53895779	0.012251	0.970269	ACTR8
rs1549523	43331991	0.206663	0.944529	ADAL
rs3742971	43330718	0.206663	0.944529	ADAL
rs3742969	43329749	0.185213	0.944529	ADAL
rs1123947	43333235	0.109575	0.944529	ADAL
rs6493087	43373774	0.0207263	0.944529	ADAL
rs66904617	43336444	0.0150095	0.944529	ADAL
rs7175434	43336344	0.0150095	0.944529	ADAL
rs1549525	43335657	0.0130249	0.944529	ADAL
rs12323999	43390917	0.00813262	0.944529	ADAL
rs2278860	43366848	0.00813262	0.944529	ADAL
rs2412779	43363729	0.00813262	0.944529	ADAL
rs2412780	43363596	0.00813262	0.944529	ADAL
rs2584702	43392716	0.00813262	0.944529	ADAL
rs28461955	43369261	0.00813262	0.944529	ADAL
rs28729853	43381482	0.00813262	0.944529	ADAL
rs2899082	43363845	0.00813262	0.944529	ADAL
rs3213991	43378082	0.00813262	0.944529	ADAL
rs4583210	43368727	0.00813262	0.944529	ADAL
rs7163245	43379096	0.00813262	0.944529	ADAL
rs7169790	43379441	0.00813262	0.944529	ADAL
rs9806227	43387917	0.00813262	0.944529	ADAL
rs12101673	43337233	0.00795822	0.944529	ADAL
rs2278859	43340762	0.00795822	0.944529	ADAL
rs7168940	43341136	0.00795822	0.944529	ADAL
rs12324572	43344002	0.00725109	0.944529	ADAL
rs28415933	43343602	0.00725109	0.944529	ADAL
rs8033714	43345179	0.00725109	0.944529	ADAL
rs8039638	43342207	0.00725109	0.944529	ADAL
rs12324584	43391248	0.004312	0.944529	ADAL
rs16957627	43350459	0.004312	0.944529	ADAL
rs2412778	43368784	0.004312	0.944529	ADAL
rs3213990	43378028	0.004312	0.944529	ADAL
rs4075674	43358032	0.004312	0.944529	ADAL
rs112517326	46016302	0.108668	0.986651	AGAP4
rs79162657	46016304	0.108668	0.986651	AGAP4
rs111645463	45975283	0.105823	0.986651	AGAP4
rs1465632500	45960487	0.105823	0.986651	AGAP4
rs200680210	45991130	0.105823	0.986651	AGAP4
rs2813034	45932452	0.105823	0.986651	AGAP4
rs34928338	45968301	0.105823	0.986651	AGAP4
rs7090363	45976512	0.105823	0.986651	AGAP4
rs80124943	45991930	0.105823	0.986651	AGAP4
rs2207000	135302695	1	0.999259	AHI1
rs4918955	95661517	0.133061	0.921261	ALDH18A1
rs12357173	95684846	0.0872564	0.921261	ALDH18A1
rs10882649	95666329	0.0814645	0.921261	ALDH18A1
rs10882650	95672939	0.0814645	0.921261	ALDH18A1
rs113729469	95668644	0.0814645	0.921261	ALDH18A1
rs61871796	95665573	0.0814645	0.921261	ALDH18A1
rs6946	95663951	0.0814645	0.921261	ALDH18A1
rs7072953	95680815	0.0814645	0.921261	ALDH18A1
rs7073010	95681055	0.0814645	0.921261	ALDH18A1
rs10509686	95817989	0.00544468	0.921261	ALDH18A1
rs10882671	95824266	0.00544468	0.921261	ALDH18A1
rs11188444	95718089	0.00544468	0.921261	ALDH18A1
rs11188455	95731166	0.00544468	0.921261	ALDH18A1
rs11188464	95739096	0.00544468	0.921261	ALDH18A1
rs11188484	95779980	0.00544468	0.921261	ALDH18A1
rs11188501	95841162	0.00544468	0.921261	ALDH18A1
rs11188504	95846467	0.00544468	0.921261	ALDH18A1
rs11188506	95852244	0.00544468	0.921261	ALDH18A1
rs11188509	95855780	0.00544468	0.921261	ALDH18A1
rs11593044	95752208	0.00544468	0.921261	ALDH18A1
rs11593761	95777855	0.00544468	0.921261	ALDH18A1
rs11597321	95752192	0.00544468	0.921261	ALDH18A1
rs117372659	95809811	0.00544468	0.921261	ALDH18A1
rs12354848	95835939	0.00544468	0.921261	ALDH18A1
rs12358481	95746346	0.00544468	0.921261	ALDH18A1
rs12359366	95731958	0.00544468	0.921261	ALDH18A1
rs12360382	95856285	0.00544468	0.921261	ALDH18A1
rs17462179	95746948	0.00544468	0.921261	ALDH18A1
rs17553401	95747716	0.00544468	0.921261	ALDH18A1
rs2861151	95793213	0.00544468	0.921261	ALDH18A1
rs3176884	95844894	0.00544468	0.921261	ALDH18A1
rs3176895	95754431	0.00544468	0.921261	ALDH18A1
rs4320886	95764839	0.00544468	0.921261	ALDH18A1
rs4402217	95853846	0.00544468	0.921261	ALDH18A1
rs4463786	95775140	0.00544468	0.921261	ALDH18A1
rs4568937	95742840	0.00544468	0.921261	ALDH18A1
rs4918966	95753605	0.00544468	0.921261	ALDH18A1
rs4918970	95803250	0.00544468	0.921261	ALDH18A1
rs4918972	95819464	0.00544468	0.921261	ALDH18A1
rs645056	107549804	0.895727	0.874659	ALKBH8
rs669588	107547075	0.0093486	0.874659	ALKBH8
rs526014	107546575	0.00845686	0.874659	ALKBH8
rs471668	107545221	0.00640237	0.874659	ALKBH8
rs499413	107545918	0.00640237	0.874659	ALKBH8
rs499477	107545947	0.00640237	0.874659	ALKBH8
rs499499	107545948	0.00640237	0.874659	ALKBH8
rs578607	107544893	0.00640237	0.874659	ALKBH8
rs608464	107544948	0.00640237	0.874659	ALKBH8
rs2570972	109509517	1	0.940393	AMIGO1
rs1863911	134486389	0.333136	0.948768	ANAPC13
rs1863912	134486385	0.333136	0.948768	ANAPC13
rs1874883	134486229	0.333136	0.948768	ANAPC13
rs12712056	97553659	0.382668	0.875963	ANKRD36B
rs2261700	97560842	0.382668	0.875963	ANKRD36B
rs6720712	97562150	0.212588	0.875963	ANKRD36B
rs10956146	123737464	0.486898	0.995566	ANXA13
rs1985668	123730712	0.486898	0.995566	ANXA13
rs12440156	89877441	0.538235	0.886016	AP3S2
rs3759831	89871410	0.20116	0.886016	AP3S2
rs2351706	89840883	0.0932115	0.886016	AP3S2
rs2043880	89889294	0.0690539	0.886016	AP3S2
rs8026131	89874767	0.0221327	0.886016	AP3S2
rs986505	89875181	0.0221327	0.886016	AP3S2
rs2351707	89840813	0.0179831	0.886016	AP3S2
rs12285752	34910042	0.573575	0.885242	APIP
rs10488801	34919190	0.0034818	0.885242	APIP
rs10488803	34927280	0.0034818	0.885242	APIP
rs10488804	34927329	0.0034818	0.885242	APIP
rs1049306	34916722	0.0034818	0.885242	APIP
rs1049307	34916763	0.0034818	0.885242	APIP
rs11032922	34910479	0.0034818	0.885242	APIP
rs11032923	34910487	0.0034818	0.885242	APIP
rs11032925	34919811	0.0034818	0.885242	APIP
rs11032926	34919817	0.0034818	0.885242	APIP
rs11032927	34921289	0.0034818	0.885242	APIP
rs11032933	34931977	0.0034818	0.885242	APIP
rs11032934	34931982	0.0034818	0.885242	APIP
rs11032935	34933346	0.0034818	0.885242	APIP
rs11032937	34939863	0.0034818	0.885242	APIP
rs11032938	34940064	0.0034818	0.885242	APIP
rs11032940	34940607	0.0034818	0.885242	APIP
rs11032941	34940786	0.0034818	0.885242	APIP
rs113073242	34916454	0.0034818	0.885242	APIP
rs11347782	34923635	0.0034818	0.885242	APIP
rs11500295	34902323	0.0034818	0.885242	APIP
rs11500296	34902443	0.0034818	0.885242	APIP
rs11500299	34902815	0.0034818	0.885242	APIP
rs12270487	34922665	0.0034818	0.885242	APIP
rs12271341	34906006	0.0034818	0.885242	APIP
rs12272965	34897540	0.0034818	0.885242	APIP
rs12273271	34907079	0.0034818	0.885242	APIP
rs12274383	34938628	0.0034818	0.885242	APIP
rs12274490	34938872	0.0034818	0.885242	APIP
rs12275275	34936269	0.0034818	0.885242	APIP
rs12275277	34936275	0.0034818	0.885242	APIP
rs12275339	34936390	0.0034818	0.885242	APIP
rs12275620	34903122	0.0034818	0.885242	APIP
rs12276735	34919297	0.0034818	0.885242	APIP
rs12278245	34905895	0.0034818	0.885242	APIP
rs12278785	34909854	0.0034818	0.885242	APIP
rs12279553	34933168	0.0034818	0.885242	APIP
rs12282098	34921944	0.0034818	0.885242	APIP
rs12282382	34939611	0.0034818	0.885242	APIP
rs12282419	34939614	0.0034818	0.885242	APIP
rs12282552	34912128	0.0034818	0.885242	APIP
rs12283763	34919501	0.0034818	0.885242	APIP
rs12285604	34909756	0.0034818	0.885242	APIP
rs12286436	34914290	0.0034818	0.885242	APIP
rs12286442	34934828	0.0034818	0.885242	APIP
rs12288594	34936363	0.0034818	0.885242	APIP
rs12288628	34936291	0.0034818	0.885242	APIP
rs12289218	34931508	0.0034818	0.885242	APIP
rs12292719	34925949	0.0034818	0.885242	APIP
rs12294047	34930059	0.0034818	0.885242	APIP
rs12294125	34939178	0.0034818	0.885242	APIP
rs12294594	34934127	0.0034818	0.885242	APIP
rs12295408	34922407	0.0034818	0.885242	APIP
rs12295537	34936286	0.0034818	0.885242	APIP
rs12385808	34939517	0.0034818	0.885242	APIP
rs16926431	34914195	0.0034818	0.885242	APIP
rs16926448	34916151	0.0034818	0.885242	APIP
rs375130125	34916532	0.0034818	0.885242	APIP
rs3763924	34918806	0.0034818	0.885242	APIP
rs3763925	34918084	0.0034818	0.885242	APIP
rs3763926	34917745	0.0034818	0.885242	APIP
rs3763929	34917388	0.0034818	0.885242	APIP
rs3763930	34915939	0.0034818	0.885242	APIP
rs3763931	34915869	0.0034818	0.885242	APIP
rs3763932	34915816	0.0034818	0.885242	APIP
rs3763933	34915783	0.0034818	0.885242	APIP
rs3763934	34915529	0.0034818	0.885242	APIP
rs3763935	34915143	0.0034818	0.885242	APIP
rs3763936	34914983	0.0034818	0.885242	APIP
rs3794161	34929357	0.0034818	0.885242	APIP
rs3794162	34929314	0.0034818	0.885242	APIP
rs3794163	34929198	0.0034818	0.885242	APIP
rs3794165	34925493	0.0034818	0.885242	APIP
rs3794166	34920422	0.0034818	0.885242	APIP
rs3794170	34915591	0.0034818	0.885242	APIP
rs3794171	34907613	0.0034818	0.885242	APIP
rs3818393	34917293	0.0034818	0.885242	APIP
rs3818396	34917004	0.0034818	0.885242	APIP
rs3818397	34916909	0.0034818	0.885242	APIP
rs3818401	34916652	0.0034818	0.885242	APIP
rs3887071	34899852	0.0034818	0.885242	APIP
rs56898019	34924280	0.0034818	0.885242	APIP
rs57613004	34908957	0.0034818	0.885242	APIP
rs58519774	34903986	0.0034818	0.885242	APIP
rs60346281	34924760	0.0034818	0.885242	APIP
rs60774328	34924756	0.0034818	0.885242	APIP
rs61446941	34924430	0.0034818	0.885242	APIP
rs6484748	34935664	0.0034818	0.885242	APIP
rs7101458	34904231	0.0034818	0.885242	APIP
rs7102259	34900891	0.0034818	0.885242	APIP
rs7104418	34913353	0.0034818	0.885242	APIP
rs7104705	34913564	0.0034818	0.885242	APIP
rs7104829	34913544	0.0034818	0.885242	APIP
rs7105141	34913874	0.0034818	0.885242	APIP
rs7105167	34913948	0.0034818	0.885242	APIP
rs7105174	34914008	0.0034818	0.885242	APIP
rs7110223	34908313	0.0034818	0.885242	APIP
rs7111607	34903344	0.0034818	0.885242	APIP
rs7113708	34908638	0.0034818	0.885242	APIP
rs7115153	34933860	0.0034818	0.885242	APIP
rs7116386	34912353	0.0034818	0.885242	APIP
rs7116411	34912431	0.0034818	0.885242	APIP
rs7119524	34934953	0.0034818	0.885242	APIP
rs7119958	34935069	0.0034818	0.885242	APIP
rs7121117	34913822	0.0034818	0.885242	APIP
rs7121341	34913953	0.0034818	0.885242	APIP
rs7126659	34911674	0.0034818	0.885242	APIP
rs7127669	34903318	0.0034818	0.885242	APIP
rs7127715	34906563	0.0034818	0.885242	APIP
rs7127846	34906609	0.0034818	0.885242	APIP
rs6519166	39076172	0.791972	0.917121	APOBEC3G
rs2011869	39084692	0.0304878	0.917121	APOBEC3G
rs2294366	39083348	0.0304878	0.917121	APOBEC3G
rs2413571	39085388	0.0244399	0.917121	APOBEC3G
rs2413572	39085890	0.0244399	0.917121	APOBEC3G
rs2899313	39086018	0.0244399	0.917121	APOBEC3G
rs5757470	39085855	0.0244399	0.917121	APOBEC3G
rs3832000	16207335	0.563657	0.984397	ARHGEF19
rs221045	16203554	0.217931	0.984397	ARHGEF19
rs221052	16206527	0.217931	0.984397	ARHGEF19
rs2296353	111280751	0.994427	0.991762	ARHGEF7
rs62080209	81669623	0.223217	0.987592	ARL16
rs11150805	81671775	0.0776652	0.987592	ARL16
rs113250157	81667511	0.0776652	0.987592	ARL16
rs11546632	81667783	0.0776652	0.987592	ARL16
rs57650499	81668619	0.0776652	0.987592	ARL16
rs59853503	81672953	0.0776652	0.987592	ARL16
rs61065803	81671019	0.0776652	0.987592	ARL16
rs61742303	81667744	0.0776652	0.987592	ARL16
rs62080208	81669123	0.0776652	0.987592	ARL16
rs7503139	81674504	0.0776652	0.987592	ARL16
rs7503637	81682485	0.0776652	0.987592	ARL16
rs2005013	231202161	0.44639	0.986696	ARMC9
rs78839329	231200746	0.275186	0.986696	ARMC9
rs10187005	231213235	0.0846399	0.986696	ARMC9
rs13431424	231195839	0.0541234	0.986696	ARMC9
rs12478335	231200253	0.0307086	0.986696	ARMC9
rs28678038	231199283	0.0307086	0.986696	ARMC9
rs58383275	231199232	0.0307086	0.986696	ARMC9
rs1133222	50756905	0.996176	0.997734	ASAH2
rs9732692	50761723	0.999999	0.944083	ASAH2B
rs2936660	1456829	1	0.999952	ATAD3C
rs10165561	233264269	0.073526	0.878952	ATG16L1
rs12162308	233263542	0.073526	0.878952	ATG16L1
rs12994997	233264857	0.073526	0.878952	ATG16L1
rs6708373	233264200	0.073526	0.878952	ATG16L1
rs13391356	233261723	0.0512208	0.878952	ATG16L1
rs2241879	233274822	0.0512208	0.878952	ATG16L1
rs2241880	233274722	0.0512208	0.878952	ATG16L1
rs2289472	233273594	0.0512208	0.878952	ATG16L1
rs2289474	233273202	0.0512208	0.878952	ATG16L1
rs55926010	233261680	0.0512208	0.878952	ATG16L1
rs3792112	233267963	0.0344972	0.878952	ATG16L1
rs2289477	233251699	0.0269212	0.878952	ATG16L1
rs6431654	233253123	0.0269212	0.878952	ATG16L1
rs6738490	233252937	0.0269212	0.878952	ATG16L1
rs6752107	233252802	0.0269212	0.878952	ATG16L1
rs6705964	233255037	0.0238878	0.878952	ATG16L1
rs2241878	233275072	0.0227234	0.878952	ATG16L1
rs36001488	233276621	0.0222343	0.878952	ATG16L1
rs3792108	233276306	0.0222343	0.878952	ATG16L1
rs3816234	233277353	0.0222343	0.878952	ATG16L1
rs2880080	233245493	0.0221784	0.878952	ATG16L1
rs35174053	233245368	0.018481	0.878952	ATG16L1
rs3792106	233282094	0.0143083	0.878952	ATG16L1
rs6745825	233253507	0.0105384	0.878952	ATG16L1
rs11679791	233247890	0.00879486	0.878952	ATG16L1
rs10210302	233250193	0.00848349	0.878952	ATG16L1
rs11680089	233248491	0.00848349	0.878952	ATG16L1
rs11680130	233248612	0.00848349	0.878952	ATG16L1
rs916134	53676019	0.471842	0.917447	ATP5MC2
rs10876480	53672487	0.0503518	0.917447	ATP5MC2
rs10876481	53672959	0.0503518	0.917447	ATP5MC2
rs11170639	53666667	0.0470195	0.917447	ATP5MC2
rs112183557	53662771	0.0470195	0.917447	ATP5MC2
rs1800633	53669717	0.0470195	0.917447	ATP5MC2
rs1971762	53664454	0.0470195	0.917447	ATP5MC2
rs4759278	53662017	0.0470195	0.917447	ATP5MC2
rs56963435	53664128	0.0470195	0.917447	ATP5MC2
rs7965111	53667573	0.0470195	0.917447	ATP5MC2
rs79942047	53662963	0.0470195	0.917447	ATP5MC2
rs3892761	53676661	0.0283293	0.917447	ATP5MC2
rs73547688	56501147	0.489408	0.985781	BBS2
rs9940094	56472214	0.489408	0.985781	BBS2
rs11191421	102863296	0.303697	0.978664	BORCS7
rs9527	102863821	0.303697	0.978664	BORCS7
rs12416687	102869254	0.185868	0.978664	BORCS7
rs4919690	102856743	0.185868	0.978664	BORCS7
rs7015	98291311	0.998139	0.886246	BRI3
rs9379871	26375626	0.171523	0.894747	BTN3A2
rs12173854	26371451	0.0213859	0.894747	BTN3A2
rs12174602	26372599	0.0213859	0.894747	BTN3A2
rs12174623	26372858	0.0213859	0.894747	BTN3A2
rs12174631	26372922	0.0213859	0.894747	BTN3A2
rs12174639	26372893	0.0213859	0.894747	BTN3A2
rs12176317	26372558	0.0213859	0.894747	BTN3A2
rs1977	26377318	0.0213859	0.894747	BTN3A2
rs1978	26377345	0.0213859	0.894747	BTN3A2
rs1979	26377363	0.0213859	0.894747	BTN3A2
rs2073527	26374750	0.0213859	0.894747	BTN3A2
rs2073529	26374931	0.0213859	0.894747	BTN3A2
rs2073531	26375028	0.0213859	0.894747	BTN3A2
rs28551159	26376140	0.0213859	0.894747	BTN3A2
rs3047288	26376086	0.0213859	0.894747	BTN3A2
rs34436535	26370137	0.0213859	0.894747	BTN3A2
rs34878490	26370344	0.0213859	0.894747	BTN3A2
rs35307327	26370246	0.0213859	0.894747	BTN3A2
rs35815698	26372232	0.0213859	0.894747	BTN3A2
rs3757138	26375875	0.0213859	0.894747	BTN3A2
rs9348716	26375430	0.0213859	0.894747	BTN3A2
rs9358935	26369359	0.0213859	0.894747	BTN3A2
rs9358936	26370429	0.0213859	0.894747	BTN3A2
rs9358937	26374046	0.0213859	0.894747	BTN3A2
rs9366655	26377157	0.0213859	0.894747	BTN3A2
rs9379859	26369321	0.0213859	0.894747	BTN3A2
rs9379863	26372199	0.0213859	0.894747	BTN3A2
rs9379864	26372356	0.0213859	0.894747	BTN3A2
rs9393711	26370431	0.0213859	0.894747	BTN3A2
rs9393712	26370772	0.0213859	0.894747	BTN3A2
rs9393713	26373450	0.0213859	0.894747	BTN3A2
rs9393714	26373512	0.0213859	0.894747	BTN3A2
rs9393715	26375417	0.0213859	0.894747	BTN3A2
rs2073530	26375015	0.0122951	0.894747	BTN3A2
rs66823108	26377711	0.0122951	0.894747	BTN3A2
rs68072215	26377699	0.0122951	0.894747	BTN3A2
rs72841536	26378060	0.0122951	0.894747	BTN3A2
rs28362606	26365358	0.00304953	0.894747	BTN3A2
rs34550936	26361757	0.00304953	0.894747	BTN3A2
rs34622023	26361891	0.00304953	0.894747	BTN3A2
rs35304979	26356119	0.00304953	0.894747	BTN3A2
rs35934643	26354866	0.00304953	0.894747	BTN3A2
rs66827971	26365538	0.00304953	0.894747	BTN3A2
rs68112369	26365531	0.00304953	0.894747	BTN3A2
rs71557332	26356625	0.00304953	0.894747	BTN3A2
rs71557334	26365685	0.00304953	0.894747	BTN3A2
rs71557335	26368051	0.00304953	0.894747	BTN3A2
rs72836482	26359013	0.00304953	0.894747	BTN3A2
rs9348709	26360083	0.00304953	0.894747	BTN3A2
rs9348712	26366283	0.00304953	0.894747	BTN3A2
rs9357006	26364400	0.00304953	0.894747	BTN3A2
rs9358930	26356783	0.00304953	0.894747	BTN3A2
rs1699387	129110343	0.0672018	0.938275	C4orf33
rs1709419	129117758	0.0672018	0.938275	C4orf33
rs1756012	129097816	0.0672018	0.938275	C4orf33
rs337277	129109497	0.0672018	0.938275	C4orf33
rs391396	129116498	0.0672018	0.938275	C4orf33
rs445294	129114734	0.0672018	0.938275	C4orf33
rs474667	129117559	0.0672018	0.938275	C4orf33
rs474794	129117519	0.0672018	0.938275	C4orf33
rs1030831	129103882	0.02216	0.938275	C4orf33
rs1037147	129104718	0.02216	0.938275	C4orf33
rs13130762	129101720	0.02216	0.938275	C4orf33
rs1699392	129101192	0.02216	0.938275	C4orf33
rs1757925	129099636	0.02216	0.938275	C4orf33
rs1757927	129100914	0.02216	0.938275	C4orf33
rs1757928	129101006	0.02216	0.938275	C4orf33
rs1757935	129102604	0.02216	0.938275	C4orf33
rs3105369	129101293	0.02216	0.938275	C4orf33
rs337278	129108724	0.02216	0.938275	C4orf33
rs56141111	129104758	0.02216	0.938275	C4orf33
rs72516826	129103571	0.02216	0.938275	C4orf33
rs1757930	129101201	0.0148309	0.938275	C4orf33
rs337263	129112510	0.0148309	0.938275	C4orf33
rs389376	129115024	0.0148309	0.938275	C4orf33
rs487233	129114987	0.0148309	0.938275	C4orf33
rs487501	129115036	0.0148309	0.938275	C4orf33
rs1699394	129098157	0.0144076	0.938275	C4orf33
rs493445	129125062	0.0136419	0.938275	C4orf33
rs517659	129124166	0.0136419	0.938275	C4orf33
rs546956	129125061	0.0136419	0.938275	C4orf33
rs576492	129124437	0.0136419	0.938275	C4orf33
rs1699380	129113426	0.00827061	0.938275	C4orf33
rs149638148	42780665	0.235807	0.938302	CCDC13
rs2372111	42760428	0.235807	0.938302	CCDC13
rs34648075	42763433	0.235807	0.938302	CCDC13
rs35488977	42791093	0.235807	0.938302	CCDC13
rs12488174	42769134	0.00353137	0.938302	CCDC13
rs13061576	42791487	0.00353137	0.938302	CCDC13
rs1044717	45510915	0.0499792	0.972965	CCDC163
rs12048936	45502933	0.0499792	0.972965	CCDC163
rs12082256	45485708	0.0499792	0.972965	CCDC163
rs1337902	45486394	0.0499792	0.972965	CCDC163
rs1494813	45491618	0.0499792	0.972965	CCDC163
rs3215980	45507763	0.0499792	0.972965	CCDC163
rs3748643	45500031	0.0499792	0.972965	CCDC163
rs4660860	45480561	0.0499792	0.972965	CCDC163
rs4660862	45489384	0.0499792	0.972965	CCDC163
rs4660864	45500910	0.0499792	0.972965	CCDC163
rs4660866	45518436	0.0499792	0.972965	CCDC163
rs6429567	45491028	0.0499792	0.972965	CCDC163
rs6667191	45517172	0.0499792	0.972965	CCDC163
rs6688424	45520044	0.0499792	0.972965	CCDC163
rs6688516	45520088	0.0499792	0.972965	CCDC163
rs7539253	45481748	0.0499792	0.972965	CCDC163
rs7543076	45498566	0.0499792	0.972965	CCDC163
rs7546268	45499668	0.0499792	0.972965	CCDC163
rs77634270	45480081	0.0499792	0.972965	CCDC163
rs937290	45496283	0.0499792	0.972965	CCDC163
rs61973461	114234990	0.262305	0.907755	CDC16
rs7998576	114275713	0.0623672	0.907755	CDC16
rs79762530	114280100	0.0603141	0.907755	CDC16
rs7319446	114263687	0.0412882	0.907755	CDC16
rs7985356	114261987	0.0412882	0.907755	CDC16
rs8809	114265239	0.0412882	0.907755	CDC16
rs9590501	114264323	0.0412882	0.907755	CDC16
rs10870597	114234161	0.0334099	0.907755	CDC16
rs7331882	114235244	0.0334099	0.907755	CDC16
rs7336692	114234842	0.0334099	0.907755	CDC16
rs9590404	114233584	0.0334099	0.907755	CDC16
rs9590405	114234363	0.0334099	0.907755	CDC16
rs7991266	114276680	0.024057	0.907755	CDC16
rs9314909	114277541	0.024057	0.907755	CDC16
rs9590504	114277266	0.024057	0.907755	CDC16
rs17291501	114264088	0.0175137	0.907755	CDC16
rs8002514	114236830	0.0157113	0.907755	CDC16
rs6560947	114237993	0.0121443	0.907755	CDC16
rs7982373	114241614	0.0121443	0.907755	CDC16
rs7987334	114241376	0.0121443	0.907755	CDC16
rs9590492	114237284	0.0121443	0.907755	CDC16
rs11617448	114259923	0.00900742	0.907755	CDC16
rs9314908	114257811	0.00900742	0.907755	CDC16
rs9590500	114254466	0.0074865	0.907755	CDC16
rs7994573	114242913	0.00737802	0.907755	CDC16
rs10575226	114278704	0.00727279	0.907755	CDC16
rs7998612	114278740	0.00727279	0.907755	CDC16
rs9285061	114280254	0.00727279	0.907755	CDC16
rs9590409	114275022	0.00727279	0.907755	CDC16
rs9805813	114279784	0.00727279	0.907755	CDC16
rs17291250	114247558	0.0055637	0.907755	CDC16
rs9314907	114249688	0.0055637	0.907755	CDC16
rs73535817	110129597	0.0457063	0.882517	CDC40
rs11153223	110119612	0.0395019	0.882517	CDC40
rs11757055	110183477	0.0395019	0.882517	CDC40
rs12660791	110135459	0.0395019	0.882517	CDC40
rs12665849	110124681	0.0395019	0.882517	CDC40
rs12665858	110124803	0.0395019	0.882517	CDC40
rs1462492	110149255	0.0395019	0.882517	CDC40
rs4299857	110113970	0.0395019	0.882517	CDC40
rs4947048	110149992	0.0395019	0.882517	CDC40
rs6926540	110173006	0.0395019	0.882517	CDC40
rs6927667	110146744	0.0395019	0.882517	CDC40
rs6927722	110109408	0.0395019	0.882517	CDC40
rs6928684	110109755	0.0395019	0.882517	CDC40
rs73535810	110115665	0.0395019	0.882517	CDC40
rs73535821	110133071	0.0395019	0.882517	CDC40
rs73535837	110154239	0.0395019	0.882517	CDC40
rs76522487	110123330	0.0395019	0.882517	CDC40
rs7744828	110182328	0.0395019	0.882517	CDC40
rs6928173	110109734	0.0328853	0.882517	CDC40
rs11751590	110164740	0.0307187	0.882517	CDC40
rs4947051	110162884	0.0307187	0.882517	CDC40
rs111952529	110199586	0.0249879	0.882517	CDC40
rs145972659	110196842	0.0249879	0.882517	CDC40
rs4339500	110190611	0.0249879	0.882517	CDC40
rs57983455	110202247	0.0249879	0.882517	CDC40
rs6918148	110211602	0.0249879	0.882517	CDC40
rs73537949	110212770	0.0249879	0.882517	CDC40
rs12740374	109274968	0.993854	0.843086	CELSR2
rs1471539	49492439	0.287645	0.947052	CENPQ
rs2501965	49488832	0.287645	0.947052	CENPQ
rs2501966	49490122	0.287645	0.947052	CENPQ
rs2501968	49492265	0.117802	0.947052	CENPQ
rs58670754	44339863	0.499129	0.998209	CFAP410
rs60027384	44339472	0.499129	0.998209	CFAP410
rs5752776	28712241	0.912331	0.996339	CHEK2
rs5752773	28709427	0.0728218	0.996339	CHEK2
rs10129479	64908462	0.0220031	0.949542	CHURC1
rs10131002	64922532	0.0220031	0.949542	CHURC1
rs10132396	64919649	0.0220031	0.949542	CHURC1
rs10132742	64920204	0.0220031	0.949542	CHURC1
rs10137070	64930009	0.0220031	0.949542	CHURC1
rs10138534	64921271	0.0220031	0.949542	CHURC1
rs10139079	64911324	0.0220031	0.949542	CHURC1
rs10139595	64911541	0.0220031	0.949542	CHURC1
rs10141986	64922685	0.0220031	0.949542	CHURC1
rs10143017	64912900	0.0220031	0.949542	CHURC1
rs10146885	64935101	0.0220031	0.949542	CHURC1
rs10147758	64929925	0.0220031	0.949542	CHURC1
rs10148687	64917558	0.0220031	0.949542	CHURC1
rs10151701	64911731	0.0220031	0.949542	CHURC1
rs11158569	64933351	0.0220031	0.949542	CHURC1
rs11331213	64928725	0.0220031	0.949542	CHURC1
rs12172810	64938664	0.0220031	0.949542	CHURC1
rs138072589	64921470	0.0220031	0.949542	CHURC1
rs141703694	64934066	0.0220031	0.949542	CHURC1
rs17102298	64910018	0.0220031	0.949542	CHURC1
rs2147615	64926200	0.0220031	0.949542	CHURC1
rs28451373	64916724	0.0220031	0.949542	CHURC1
rs28508270	64916837	0.0220031	0.949542	CHURC1
rs3033504	64925824	0.0220031	0.949542	CHURC1
rs3949937	64927009	0.0220031	0.949542	CHURC1
rs4899152	64920398	0.0220031	0.949542	CHURC1
rs4899153	64921993	0.0220031	0.949542	CHURC1
rs4902332	64909260	0.0220031	0.949542	CHURC1
rs4902333	64909368	0.0220031	0.949542	CHURC1
rs4902335	64919180	0.0220031	0.949542	CHURC1
rs4902336	64920544	0.0220031	0.949542	CHURC1
rs4902337	64921750	0.0220031	0.949542	CHURC1
rs4902338	64927350	0.0220031	0.949542	CHURC1
rs4902340	64928663	0.0220031	0.949542	CHURC1
rs4902341	64928907	0.0220031	0.949542	CHURC1
rs4902343	64929462	0.0220031	0.949542	CHURC1
rs67330703	64928346	0.0220031	0.949542	CHURC1
rs6745	64934977	0.0220031	0.949542	CHURC1
rs7143432	64912428	0.0220031	0.949542	CHURC1
rs7143764	64912565	0.0220031	0.949542	CHURC1
rs7144811	64912429	0.0220031	0.949542	CHURC1
rs7153503	64910765	0.0220031	0.949542	CHURC1
rs7153990	64910832	0.0220031	0.949542	CHURC1
rs7154406	64910471	0.0220031	0.949542	CHURC1
rs11547207	78131254	0.999989	0.999988	CIB2
rs187079149	130591836	0.253508	0.972467	COPG2
rs143771252	130590784	0.223788	0.972467	COPG2
rs1127302	130546550	0.0519194	0.972467	COPG2
rs138265226	130589705	0.0517152	0.972467	COPG2
rs151321190	130588896	0.0517152	0.972467	COPG2
rs2129904	130595870	0.0517152	0.972467	COPG2
rs1021830339	130521438	0.0494438	0.972467	COPG2
rs36163687	130521845	0.0494438	0.972467	COPG2
rs968939679	130521441	0.0494438	0.972467	COPG2
rs968992110	130521103	0.0494438	0.972467	COPG2
rs147138679	130590950	0.0414257	0.972467	COPG2
rs997658872	130542548	0.0165538	0.972467	COPG2
rs991853626	130528632	0.0113613	0.972467	COPG2
rs4792446	14206724	0.622956	0.991939	COX10
rs11078234	14207584	0.36435	0.991939	COX10
rs1981664	42350030	0.526979	0.836945	COX7A2L
rs10183278	42344346	0.240865	0.836945	COX7A2L
rs2041354	42345535	0.124308	0.836945	COX7A2L
rs12613284	42335647	0.0626739	0.836945	COX7A2L
rs2425104	35724424	0.0770894	0.94369	CPNE1
rs1056196	35739237	0.0277252	0.94369	CPNE1
rs11167275	35752353	0.0277252	0.94369	CPNE1
rs1118233	35640427	0.0277252	0.94369	CPNE1
rs112339847	35716302	0.0277252	0.94369	CPNE1
rs11696947	35724736	0.0277252	0.94369	CPNE1
rs11699690	35683852	0.0277252	0.94369	CPNE1
rs12480408	35646878	0.0277252	0.94369	CPNE1
rs13038622	35731421	0.0277252	0.94369	CPNE1
rs147767406	35638604	0.0277252	0.94369	CPNE1
rs17093027	35731196	0.0277252	0.94369	CPNE1
rs1970357	35751278	0.0277252	0.94369	CPNE1
rs35801758	35708586	0.0277252	0.94369	CPNE1
rs45595739	35732837	0.0277252	0.94369	CPNE1
rs6058303	35702359	0.0277252	0.94369	CPNE1
rs6058304	35711929	0.0277252	0.94369	CPNE1
rs6058309	35732331	0.0277252	0.94369	CPNE1
rs6058310	35733404	0.0277252	0.94369	CPNE1
rs6058311	35733973	0.0277252	0.94369	CPNE1
rs6060524	35633233	0.0277252	0.94369	CPNE1
rs6060535	35647600	0.0277252	0.94369	CPNE1
rs6060547	35673204	0.0277252	0.94369	CPNE1
rs6060557	35682344	0.0277252	0.94369	CPNE1
rs6060564	35696767	0.0277252	0.94369	CPNE1
rs6060578	35717523	0.0277252	0.94369	CPNE1
rs6060583	35726192	0.0277252	0.94369	CPNE1
rs6060585	35727583	0.0277252	0.94369	CPNE1
rs6060588	35749558	0.0277252	0.94369	CPNE1
rs7263640	35726803	0.0277252	0.94369	CPNE1
rs7273815	35644493	0.0277252	0.94369	CPNE1
rs73905926	35664060	0.0277252	0.94369	CPNE1
rs73905955	35745016	0.0277252	0.94369	CPNE1
rs79035779	35755082	0.0277252	0.94369	CPNE1
rs2280836	144396341	1	0.866819	CPSF1
rs11905116	49041527	0.0264873	0.907503	CSE1L
rs13041022	49025939	0.0264873	0.907503	CSE1L
rs1569749	48984972	0.0264873	0.907503	CSE1L
rs16994347	49036824	0.0264873	0.907503	CSE1L
rs1983639	48955745	0.0264873	0.907503	CSE1L
rs1997854	48985802	0.0264873	0.907503	CSE1L
rs2295027	48966347	0.0264873	0.907503	CSE1L
rs34984028	48932510	0.0264873	0.907503	CSE1L
rs6019557	48966835	0.0264873	0.907503	CSE1L
rs6019558	48966943	0.0264873	0.907503	CSE1L
rs6019591	49023492	0.0264873	0.907503	CSE1L
rs6019593	49023631	0.0264873	0.907503	CSE1L
rs6019594	49027017	0.0264873	0.907503	CSE1L
rs6019603	49036869	0.0264873	0.907503	CSE1L
rs6019604	49036961	0.0264873	0.907503	CSE1L
rs6019609	49039231	0.0264873	0.907503	CSE1L
rs6090932	48981761	0.0264873	0.907503	CSE1L
rs6095367	48933951	0.0264873	0.907503	CSE1L
rs6095407	49044933	0.0264873	0.907503	CSE1L
rs66970580	49024802	0.0264873	0.907503	CSE1L
rs7262379	49026042	0.0264873	0.907503	CSE1L
rs7270848	49023200	0.0264873	0.907503	CSE1L
rs927160	49038027	0.0264873	0.907503	CSE1L
rs1048590	48993760	0.0105439	0.907503	CSE1L
rs2295033	48994359	0.0105439	0.907503	CSE1L
rs34537217	49007949	0.0105439	0.907503	CSE1L
rs6012586	49030880	0.0105439	0.907503	CSE1L
rs6019595	49027495	0.0105439	0.907503	CSE1L
rs6019601	49031125	0.0105439	0.907503	CSE1L
rs6019602	49034955	0.0105439	0.907503	CSE1L
rs6095400	49029452	0.0105439	0.907503	CSE1L
rs6095401	49030084	0.0105439	0.907503	CSE1L
rs68087998	49027755	0.0105439	0.907503	CSE1L
rs707533	49035717	0.0105439	0.907503	CSE1L
rs707534	49035801	0.0105439	0.907503	CSE1L
rs73623293	49028465	0.0105439	0.907503	CSE1L
rs13042947	49031339	0.00980749	0.907503	CSE1L
rs2075675	49068956	0.00867981	0.907503	CSE1L
rs2075676	49074674	0.00867981	0.907503	CSE1L
rs2426117	49076623	0.00867981	0.907503	CSE1L
rs2426120	49080716	0.00867981	0.907503	CSE1L
rs2426121	49081195	0.00867981	0.907503	CSE1L
rs2426122	49081402	0.00867981	0.907503	CSE1L
rs2869694	49051846	0.00867981	0.907503	CSE1L
rs35018308	49051385	0.00867981	0.907503	CSE1L
rs3795082	49056465	0.00867981	0.907503	CSE1L
rs3817652	49046831	0.00867981	0.907503	CSE1L
rs6012590	49050700	0.00867981	0.907503	CSE1L
rs6012591	49050805	0.00867981	0.907503	CSE1L
rs6012592	49060625	0.00867981	0.907503	CSE1L
rs6019613	49048130	0.00867981	0.907503	CSE1L
rs6019618	49055001	0.00867981	0.907503	CSE1L
rs6019620	49062763	0.00867981	0.907503	CSE1L
rs6019621	49063426	0.00867981	0.907503	CSE1L
rs6019624	49069278	0.00867981	0.907503	CSE1L
rs6090939	49049288	0.00867981	0.907503	CSE1L
rs6090940	49049490	0.00867981	0.907503	CSE1L
rs6090941	49060414	0.00867981	0.907503	CSE1L
rs6095417	49061664	0.00867981	0.907503	CSE1L
rs6512567	49072083	0.00867981	0.907503	CSE1L
rs62032983	23642022	0.471948	0.955483	DCTN5
rs249870	23654857	0.0961242	0.955483	DCTN5
rs7588	23669844	0.0961242	0.955483	DCTN5
rs249855	23646655	0.0767512	0.955483	DCTN5
rs249856	23647655	0.0384489	0.955483	DCTN5
rs11407519	23661513	0.0370195	0.955483	DCTN5
rs171617	23683453	0.0370195	0.955483	DCTN5
rs42873	23683411	0.0370195	0.955483	DCTN5
rs34514	23659276	0.025553	0.955483	DCTN5
rs249867	23657247	0.0148075	0.955483	DCTN5
rs35634	23686358	0.0148075	0.955483	DCTN5
rs703767	23650318	0.0148075	0.955483	DCTN5
rs233127	85328118	0.0875036	0.952618	DDAH1
rs233108	85316037	0.0621891	0.952618	DDAH1
rs233113	85320616	0.0621891	0.952618	DDAH1
rs233114	85321274	0.0621891	0.952618	DDAH1
rs233115	85321294	0.0621891	0.952618	DDAH1
rs233119	85322369	0.0621891	0.952618	DDAH1
rs233120	85322807	0.0621891	0.952618	DDAH1
rs3216612	85327421	0.0621891	0.952618	DDAH1
rs233067	85339295	0.0454879	0.952618	DDAH1
rs233057	85333172	0.0303725	0.952618	DDAH1
rs233058	85333182	0.0303725	0.952618	DDAH1
rs233059	85333253	0.0303725	0.952618	DDAH1
rs233060	85333260	0.0303725	0.952618	DDAH1
rs233062	85334702	0.0303725	0.952618	DDAH1
rs233130	85329429	0.0303725	0.952618	DDAH1
rs233131	85329576	0.0303725	0.952618	DDAH1
rs233132	85330862	0.0303725	0.952618	DDAH1
rs35822306	85334770	0.0303725	0.952618	DDAH1
rs35901619	85333030	0.0303725	0.952618	DDAH1
rs423105	85330744	0.0303725	0.952618	DDAH1
rs173026	85338566	0.0277582	0.952618	DDAH1
rs233069	85339783	0.0277582	0.952618	DDAH1
rs57037358	132141098	0.980071	0.981702	DDX51
rs12082129	200681362	0.999952	0.987925	DDX59
rs900776	22060578	1	1	DMTN
rs17553284	43023570	1	0.994983	DNAJC15
rs3003572	128209149	0.999998	0.999766	DNM1
rs2246810	36203237	0.986829	0.994199	DOP1B
rs10955938	119857811	0.11111	0.991763	DSCC1
rs112258300	119853695	0.11111	0.991763	DSCC1
rs113408398	119855898	0.11111	0.991763	DSCC1
rs11785110	119857948	0.11111	0.991763	DSCC1
rs28619135	119858365	0.11111	0.991763	DSCC1
rs28700049	119858354	0.11111	0.991763	DSCC1
rs55741337	119858877	0.11111	0.991763	DSCC1
rs62526622	119852600	0.11111	0.991763	DSCC1
rs7815122	119856782	0.11111	0.991763	DSCC1
rs34597012	30667817	0.999566	0.999916	DUSP18
rs13395911	232655544	1	0.999991	EFHD1
rs1769590	33909393	0.498771	0.997382	EGLN3
rs1769591	33909680	0.498771	0.997382	EGLN3
rs2236352	24141524	0.997101	0.984782	EMC9
rs34879184	79082873	0.403146	0.961558	ENGASE
rs61756761	79083494	0.403146	0.961558	ENGASE
rs71385997	79085118	0.188935	0.961558	ENGASE
rs1042032	27544557	0.499405	0.992738	EPHX2
rs1126452	27544447	0.499405	0.992738	EPHX2
rs2910686	96916885	0.5	0.999001	ERAP2
rs2927608	96916728	0.5	0.999001	ERAP2
rs4985407	70251998	0.97745	0.995589	EXOSC6
rs1801020	177409531	0.999998	0.999954	F12
rs2467579	74897575	0.0757105	0.955125	FADS6
rs2467580	74897567	0.0757105	0.955125	FADS6
rs2467581	74896285	0.0757105	0.955125	FADS6
rs2638078	74896398	0.0757105	0.955125	FADS6
rs525617	74894359	0.0757105	0.955125	FADS6
rs550347	74894739	0.0757105	0.955125	FADS6
rs552136	74894925	0.0757105	0.955125	FADS6
rs690019	74894094	0.0757105	0.955125	FADS6
rs9895735	74895801	0.0757105	0.955125	FADS6
rs9910846	74895706	0.0757105	0.955125	FADS6
rs1157439791	74893123	0.0296603	0.955125	FADS6
rs1396069192	74892415	0.0296603	0.955125	FADS6
rs489152	74892709	0.0296603	0.955125	FADS6
rs538216	74892000	0.0296603	0.955125	FADS6
rs540725	74892219	0.0296603	0.955125	FADS6
rs690607	74892286	0.0296603	0.955125	FADS6
rs690616	74892235	0.0296603	0.955125	FADS6
rs10927902	16068652	0.187846	0.994443	FAM131C
rs10803416	16065992	0.162431	0.994443	FAM131C
rs10803417	16067457	0.162431	0.994443	FAM131C
rs10803418	16067893	0.162431	0.994443	FAM131C
rs10927901	16067316	0.162431	0.994443	FAM131C
rs11590986	16066898	0.162431	0.994443	FAM131C
rs1762200	119004753	0.09106	0.971687	FAM184A
rs794260	119008837	0.09106	0.971687	FAM184A
rs794261	119007434	0.09106	0.971687	FAM184A
rs794262	119005947	0.09106	0.971687	FAM184A
rs794263	119001303	0.09106	0.971687	FAM184A
rs794264	119001257	0.09106	0.971687	FAM184A
rs2357020	118986644	0.0471221	0.971687	FAM184A
rs2051056	118978418	0.0412978	0.971687	FAM184A
rs2051057	118978278	0.0412978	0.971687	FAM184A
rs2797352	118996678	0.0412978	0.971687	FAM184A
rs4946383	118983460	0.0412978	0.971687	FAM184A
rs57100274	118993610	0.0412978	0.971687	FAM184A
rs57285368	118993517	0.0412978	0.971687	FAM184A
rs71738372	118990590	0.0412978	0.971687	FAM184A
rs794266	118999148	0.0412978	0.971687	FAM184A
rs9401113	118993959	0.0412978	0.971687	FAM184A
rs3134867	1684252	0.996393	0.988454	FAM53A
rs641421	51849336	1	0.999747	FIGNL2
rs9928222	2936322	1	0.996663	FLYWCH1
rs10912810	171343077	0.113437	0.83712	FMO1
rs12121479	171342216	0.113437	0.83712	FMO1
rs2235508	171344796	0.113437	0.83712	FMO1
rs2235509	171344852	0.113437	0.83712	FMO1
rs2235510	171345003	0.113437	0.83712	FMO1
rs36112567	171342892	0.113437	0.83712	FMO1
rs7518648	171344602	0.113437	0.83712	FMO1
rs10912834	171360867	0.0892401	0.83712	FMO1
rs10912842	171365688	0.0892401	0.83712	FMO1
rs10912810	171343077	0.141284	0.990862	FMO4
rs12121479	171342216	0.141284	0.990862	FMO4
rs2235508	171344796	0.141284	0.990862	FMO4
rs2235509	171344852	0.141284	0.990862	FMO4
rs2235510	171345003	0.141284	0.990862	FMO4
rs36112567	171342892	0.141284	0.990862	FMO4
rs7518648	171344602	0.141284	0.990862	FMO4
rs3830531	82720752	0.5	0.998981	FN3KRP
rs58867683	82721579	0.5	0.998981	FN3KRP
rs1499245	22686310	0.0413806	0.903411	GAS2
rs7930884	22673394	0.0328255	0.903411	GAS2
rs7930898	22673434	0.0328255	0.903411	GAS2
rs34126473	22681833	0.0282706	0.903411	GAS2
rs1125897	22673995	0.0249266	0.903411	GAS2
rs424500	22679611	0.0243042	0.903411	GAS2
rs443661	22679279	0.0243042	0.903411	GAS2
rs380231	22686013	0.0214274	0.903411	GAS2
rs11327326	22684512	0.0137068	0.903411	GAS2
rs113705820	22681311	0.0137068	0.903411	GAS2
rs113999483	22681307	0.0137068	0.903411	GAS2
rs114299927	22681306	0.0137068	0.903411	GAS2
rs151113234	22682295	0.0137068	0.903411	GAS2
rs1695520	22682958	0.0137068	0.903411	GAS2
rs2928338	22682550	0.0137068	0.903411	GAS2
rs2928339	22682427	0.0137068	0.903411	GAS2
rs2928343	22683302	0.0137068	0.903411	GAS2
rs2928345	22680792	0.0137068	0.903411	GAS2
rs2956868	22683250	0.0137068	0.903411	GAS2
rs34144110	22678589	0.0137068	0.903411	GAS2
rs372669	22683794	0.0137068	0.903411	GAS2
rs373751	22684104	0.0137068	0.903411	GAS2
rs378431	22685502	0.0137068	0.903411	GAS2
rs380792	22683651	0.0137068	0.903411	GAS2
rs385907	22680015	0.0137068	0.903411	GAS2
rs395398	22685921	0.0137068	0.903411	GAS2
rs395810	22684866	0.0137068	0.903411	GAS2
rs400650	22683420	0.0137068	0.903411	GAS2
rs400782	22680214	0.0137068	0.903411	GAS2
rs400862	22683411	0.0137068	0.903411	GAS2
rs400869	22683401	0.0137068	0.903411	GAS2
rs408197	22681733	0.0137068	0.903411	GAS2
rs421953	22671708	0.0137068	0.903411	GAS2
rs426876	22681814	0.0137068	0.903411	GAS2
rs430864	22680144	0.0137068	0.903411	GAS2
rs431127	22678845	0.0137068	0.903411	GAS2
rs434643	22680411	0.0137068	0.903411	GAS2
rs437734	22678668	0.0137068	0.903411	GAS2
rs439404	22679982	0.0137068	0.903411	GAS2
rs439540	22679910	0.0137068	0.903411	GAS2
rs448264	22685554	0.0137068	0.903411	GAS2
rs598393	22684506	0.0137068	0.903411	GAS2
rs601069	22685090	0.0137068	0.903411	GAS2
rs612567	22685357	0.0137068	0.903411	GAS2
rs671057	22684533	0.0137068	0.903411	GAS2
rs7125750	22680851	0.0137068	0.903411	GAS2
rs1874978	22671192	0.00874499	0.903411	GAS2
rs2030159	22670762	0.00874499	0.903411	GAS2
rs2062449	22670893	0.00874499	0.903411	GAS2
rs2062450	22670929	0.00874499	0.903411	GAS2
rs1032681	22674566	0.00702288	0.903411	GAS2
rs10734315	22676309	0.00702288	0.903411	GAS2
rs10734317	22676421	0.00702288	0.903411	GAS2
rs10734318	22676424	0.00702288	0.903411	GAS2
rs10741944	22671627	0.00702288	0.903411	GAS2
rs10741945	22676259	0.00702288	0.903411	GAS2
rs10741946	22676281	0.00702288	0.903411	GAS2
rs10741947	22676479	0.00702288	0.903411	GAS2
rs10766961	22673619	0.00702288	0.903411	GAS2
rs1121196	22674445	0.00702288	0.903411	GAS2
rs1121197	22674499	0.00702288	0.903411	GAS2
rs1121198	22674501	0.00702288	0.903411	GAS2
rs1125485	22674670	0.00702288	0.903411	GAS2
rs1125898	22673967	0.00702288	0.903411	GAS2
rs1125899	22673952	0.00702288	0.903411	GAS2
rs1391976	22677934	0.00702288	0.903411	GAS2
rs1993964	22672567	0.00702288	0.903411	GAS2
rs1993966	22673004	0.00702288	0.903411	GAS2
rs2046053	22673122	0.00702288	0.903411	GAS2
rs2279240	22675344	0.00702288	0.903411	GAS2
rs33998923	22675685	0.00702288	0.903411	GAS2
rs373442161	22675683	0.00702288	0.903411	GAS2
rs4301790	22677165	0.00702288	0.903411	GAS2
rs4312064	22677207	0.00702288	0.903411	GAS2
rs10922533	88990976	0.748098	0.98686	GBP3
rs10493821	89009452	0.0982393	0.98686	GBP3
rs12121223	89015900	0.0982393	0.98686	GBP3
rs142326907	88990311	0.0550623	0.98686	GBP3
rs605659	78132160	0.106335	0.821412	GIPC2
rs523751	78139995	0.0872634	0.821412	GIPC2
rs582395	78140900	0.0872634	0.821412	GIPC2
rs593652	78131828	0.0872634	0.821412	GIPC2
rs600781	78140664	0.0872634	0.821412	GIPC2
rs609390	78130628	0.0872634	0.821412	GIPC2
rs614963	78137383	0.0253398	0.821412	GIPC2
rs627661	78136807	0.0253398	0.821412	GIPC2
rs633227	78133685	0.0253398	0.821412	GIPC2
rs663254	78137257	0.0253398	0.821412	GIPC2
rs687708	78134122	0.0253398	0.821412	GIPC2
rs139844601	78126056	0.0161809	0.821412	GIPC2
rs10677116	78139556	0.0066536	0.821412	GIPC2
rs494496	78140894	0.0066536	0.821412	GIPC2
rs501774	78147115	0.0066536	0.821412	GIPC2
rs513245	78143013	0.0066536	0.821412	GIPC2
rs521029	78140285	0.0066536	0.821412	GIPC2
rs524757	78139865	0.0066536	0.821412	GIPC2
rs526723	78139629	0.0066536	0.821412	GIPC2
rs554298	78138930	0.0066536	0.821412	GIPC2
rs557688	78138585	0.0066536	0.821412	GIPC2
rs558643	78145451	0.0066536	0.821412	GIPC2
rs580426	78138412	0.0066536	0.821412	GIPC2
rs582281	78140979	0.0066536	0.821412	GIPC2
rs584660	78138105	0.0066536	0.821412	GIPC2
rs585100	78138024	0.0066536	0.821412	GIPC2
rs609359	78139523	0.0066536	0.821412	GIPC2
rs612486	78138800	0.0066536	0.821412	GIPC2
rs633769	78141690	0.0066536	0.821412	GIPC2
rs637943	78145383	0.0066536	0.821412	GIPC2
rs642248	78138162	0.0066536	0.821412	GIPC2
rs644359	78141667	0.0066536	0.821412	GIPC2
rs656372	78145861	0.0066536	0.821412	GIPC2
rs659251	78140992	0.0066536	0.821412	GIPC2
rs674933	78139733	0.0066536	0.821412	GIPC2
rs650495	78125074	0.00618372	0.821412	GIPC2
rs531841	78129703	0.00580512	0.821412	GIPC2
rs651413	78129697	0.00561518	0.821412	GIPC2
rs540742	78119402	0.00528529	0.821412	GIPC2
rs587433	78121562	0.00528529	0.821412	GIPC2
rs616332	78121172	0.00528529	0.821412	GIPC2
rs617195	78121000	0.00528529	0.821412	GIPC2
rs621524	78121637	0.00528529	0.821412	GIPC2
rs35951178	78116931	0.00460086	0.821412	GIPC2
rs507045	78118041	0.00460086	0.821412	GIPC2
rs534283	78118686	0.00460086	0.821412	GIPC2
rs561300	78116398	0.00460086	0.821412	GIPC2
rs566236	78125409	0.00460086	0.821412	GIPC2
rs585072	78115586	0.00460086	0.821412	GIPC2
rs586333	78115319	0.00460086	0.821412	GIPC2
rs595384	78115409	0.00460086	0.821412	GIPC2
rs599417	78114719	0.00460086	0.821412	GIPC2
rs651897	78118793	0.00460086	0.821412	GIPC2
rs685393	78113677	0.00460086	0.821412	GIPC2
rs685848	78113798	0.00460086	0.821412	GIPC2
rs148980175	78127995	0.00426453	0.821412	GIPC2
rs478308	78128030	0.00426453	0.821412	GIPC2
rs599293	78128532	0.00426453	0.821412	GIPC2
rs12079226	156300270	0.0895578	0.98694	GLMP
rs2104404	156287122	0.0895578	0.98694	GLMP
rs2277872	156276937	0.0895578	0.98694	GLMP
rs34398272	156322507	0.0895578	0.98694	GLMP
rs3795728	156291700	0.0895578	0.98694	GLMP
rs4661038	156288712	0.0895578	0.98694	GLMP
rs6672860	156324106	0.0895578	0.98694	GLMP
rs6696400	156306425	0.0895578	0.98694	GLMP
rs7523827	156298539	0.0895578	0.98694	GLMP
rs7537271	156290761	0.0895578	0.98694	GLMP
rs7543925	156330319	0.0895578	0.98694	GLMP
rs73550818	58730951	0.999982	0.989966	GOT2
rs340135	6737228	0.973378	0.984521	GPR108
rs12089784	52602758	0.999784	0.984272	GPX7
rs4907618	113360700	0.333325	0.982272	GRTP1
rs4907622	113362571	0.333325	0.982272	GRTP1
rs9549753	113363723	0.333325	0.982272	GRTP1
rs2286156	77397143	0.998471	0.933315	GSAP
rs35941406	96363513	0.82479	0.97561	GSKIP
rs11160333	96355059	0.0334769	0.97561	GSKIP
rs11624919	96346836	0.0334769	0.97561	GSKIP
rs12590189	96346483	0.0334769	0.97561	GSKIP
rs35946663	96363661	0.0283472	0.97561	GSKIP
rs523605	52912809	0.224397	0.963354	GSTA4
rs502304	52915592	0.084094	0.963354	GSTA4
rs503101	52915650	0.084094	0.963354	GSTA4
rs593482	52916480	0.084094	0.963354	GSTA4
rs593515	52916503	0.084094	0.963354	GSTA4
rs607500	52917316	0.084094	0.963354	GSTA4
rs623692	52918625	0.084094	0.963354	GSTA4
rs635458	52918965	0.084094	0.963354	GSTA4
rs684829	52915060	0.084094	0.963354	GSTA4
rs12202200	52914409	0.0124206	0.963354	GSTA4
rs477044	52918031	0.0124206	0.963354	GSTA4
rs481437	52918455	0.0124206	0.963354	GSTA4
rs562606	52917572	0.0124206	0.963354	GSTA4
rs608855	52917639	0.0124206	0.963354	GSTA4
rs1332018	109740350	0.715462	0.970542	GSTM3
rs4970777	109741163	0.232282	0.970542	GSTM3
rs10735234	109739319	0.0356532	0.970542	GSTM3
rs276204	104275555	0.441984	0.969392	GSTO2
rs157077	104278136	0.0947917	0.969392	GSTO2
rs156697	104279427	0.0860451	0.969392	GSTO2
rs276203	104279545	0.0860451	0.969392	GSTO2
rs2282326	104260640	0.0743259	0.969392	GSTO2
rs568526	104273681	0.0698298	0.969392	GSTO2
rs1147611	104265500	0.0488637	0.969392	GSTO2
rs641071	104268399	0.0488637	0.969392	GSTO2
rs5760119	23924644	0.496061	0.96952	GSTT2B
rs5760120	23924680	0.496061	0.96952	GSTT2B
rs10948027	42212262	0.0190351	0.920148	GUCA1B
rs10948028	42216129	0.0190351	0.920148	GUCA1B
rs12204059	42215262	0.0190351	0.920148	GUCA1B
rs12215589	42212328	0.0190351	0.920148	GUCA1B
rs12660313	42213518	0.0190351	0.920148	GUCA1B
rs13197564	42216662	0.0190351	0.920148	GUCA1B
rs1569880	42192855	0.0190351	0.920148	GUCA1B
rs1884318	42214222	0.0190351	0.920148	GUCA1B
rs2144443	42203822	0.0190351	0.920148	GUCA1B
rs2144444	42203807	0.0190351	0.920148	GUCA1B
rs2180172	42200804	0.0190351	0.920148	GUCA1B
rs2180174	42200232	0.0190351	0.920148	GUCA1B
rs2273281	42214774	0.0190351	0.920148	GUCA1B
rs2273283	42214035	0.0190351	0.920148	GUCA1B
rs2295277	42210840	0.0190351	0.920148	GUCA1B
rs2295278	42208382	0.0190351	0.920148	GUCA1B
rs2395803	42190858	0.0190351	0.920148	GUCA1B
rs2395804	42196012	0.0190351	0.920148	GUCA1B
rs2395807	42196186	0.0190351	0.920148	GUCA1B
rs2395808	42200863	0.0190351	0.920148	GUCA1B
rs2894442	42192479	0.0190351	0.920148	GUCA1B
rs2894443	42204208	0.0190351	0.920148	GUCA1B
rs3199639	42207325	0.0190351	0.920148	GUCA1B
rs34197187	42191830	0.0190351	0.920148	GUCA1B
rs34300020	42191967	0.0190351	0.920148	GUCA1B
rs35129077	42191914	0.0190351	0.920148	GUCA1B
rs35244678	42192121	0.0190351	0.920148	GUCA1B
rs36172049	42209642	0.0190351	0.920148	GUCA1B
rs3749921	42194650	0.0190351	0.920148	GUCA1B
rs4714577	42197962	0.0190351	0.920148	GUCA1B
rs4714578	42198312	0.0190351	0.920148	GUCA1B
rs55734519	42209290	0.0190351	0.920148	GUCA1B
rs55828715	42196822	0.0190351	0.920148	GUCA1B
rs6907587	42198814	0.0190351	0.920148	GUCA1B
rs6912658	42199423	0.0190351	0.920148	GUCA1B
rs6924589	42201307	0.0190351	0.920148	GUCA1B
rs6925355	42201465	0.0190351	0.920148	GUCA1B
rs6929797	42207530	0.0190351	0.920148	GUCA1B
rs7754490	42205516	0.0190351	0.920148	GUCA1B
rs7765328	42215024	0.0190351	0.920148	GUCA1B
rs8850	42206873	0.0190351	0.920148	GUCA1B
rs9357389	42192707	0.0190351	0.920148	GUCA1B
rs9357390	42202618	0.0190351	0.920148	GUCA1B
rs9357391	42212367	0.0190351	0.920148	GUCA1B
rs9367134	42212666	0.0190351	0.920148	GUCA1B
rs9369346	42191394	0.0190351	0.920148	GUCA1B
rs9369347	42194048	0.0190351	0.920148	GUCA1B
rs9369349	42211215	0.0190351	0.920148	GUCA1B
rs9369350	42211353	0.0190351	0.920148	GUCA1B
rs9381154	42197136	0.0190351	0.920148	GUCA1B
rs1078378	60078969	0.189436	0.985747	HEATR6
rs146495538	60083206	0.189436	0.985747	HEATR6
rs199798097	60083207	0.189436	0.985747	HEATR6
rs2087840	60079066	0.189436	0.985747	HEATR6
rs8066241	60079788	0.189436	0.985747	HEATR6
rs10515177	60090124	0.0140253	0.985747	HEATR6
rs1141463	82419814	0.294212	0.969609	HEXD
rs34339733	82431169	0.193467	0.969609	HEXD
rs9902897	82425968	0.193467	0.969609	HEXD
rs9914195	82426276	0.193467	0.969609	HEXD
rs4074069	82419530	0.107469	0.969609	HEXD
rs2524119	31261627	1	0.990606	HLA-C
rs7938944	119083356	0.352891	0.968696	HMBS
rs7952700	119083484	0.298479	0.968696	HMBS
rs7127212	119082492	0.193441	0.968696	HMBS
rs1799993	119087417	0.126701	0.968696	HMBS
rs35251247	43856909	0.891617	0.982439	HSD17B12
rs7131110	43825300	0.0150096	0.982439	HSD17B12
rs57635800	43856935	0.00931739	0.982439	HSD17B12
rs2863026	43817104	0.00403678	0.982439	HSD17B12
rs10768983	43818385	0.00291329	0.982439	HSD17B12
rs10768984	43822650	0.00291329	0.982439	HSD17B12
rs10838174	43801207	0.00291329	0.982439	HSD17B12
rs1464230	43827204	0.00291329	0.982439	HSD17B12
rs146635402	43855654	0.00291329	0.982439	HSD17B12
rs1518814	43803083	0.00291329	0.982439	HSD17B12
rs1518821	43850446	0.00291329	0.982439	HSD17B12
rs1518822	43850247	0.00291329	0.982439	HSD17B12
rs1878850	43798926	0.00291329	0.982439	HSD17B12
rs1878851	43798974	0.00291329	0.982439	HSD17B12
rs2037297	43825155	0.00291329	0.982439	HSD17B12
rs2273514	94129652	1	0.999823	IFI27L2
rs1468458	112466177	0.525109	0.96487	IFRD1
rs34633971	112473591	0.219634	0.96487	IFRD1
rs1468457	112465957	0.0850855	0.96487	IFRD1
rs3807213	112465699	0.0850855	0.96487	IFRD1
rs6967593	112456737	0.0850855	0.96487	IFRD1
rs1009312	47254774	0.10036	0.956026	ITGB3
rs11871407	47253992	0.0448856	0.956026	ITGB3
rs11871447	47254252	0.0448856	0.956026	ITGB3
rs12937929	47250342	0.0448856	0.956026	ITGB3
rs149459956	47248843	0.0448856	0.956026	ITGB3
rs2015049	47254865	0.0448856	0.956026	ITGB3
rs2037150	47251352	0.0448856	0.956026	ITGB3
rs2317384	47252404	0.0448856	0.956026	ITGB3
rs2317385	47252316	0.0448856	0.956026	ITGB3
rs35125273	47250675	0.0448856	0.956026	ITGB3
rs3809861	47252700	0.0448856	0.956026	ITGB3
rs3809862	47253062	0.0448856	0.956026	ITGB3
rs55827077	47253717	0.0448856	0.956026	ITGB3
rs66738981	47248172	0.0448856	0.956026	ITGB3
rs67544603	47250663	0.0448856	0.956026	ITGB3
rs67923812	47248785	0.0448856	0.956026	ITGB3
rs7208170	47253393	0.0448856	0.956026	ITGB3
rs7218524	47249199	0.0448856	0.956026	ITGB3
rs7223766	47249368	0.0448856	0.956026	ITGB3
rs7224990	47249512	0.0448856	0.956026	ITGB3
rs177763	63559093	0.0416688	0.960418	ITGB3BP
rs217446	63545149	0.0416688	0.960418	ITGB3BP
rs217448	63543803	0.0416688	0.960418	ITGB3BP
rs217456	63581469	0.0416688	0.960418	ITGB3BP
rs217460	63579968	0.0416688	0.960418	ITGB3BP
rs217483	63552159	0.0416688	0.960418	ITGB3BP
rs217490	63593973	0.0416688	0.960418	ITGB3BP
rs2474469	63528821	0.0416688	0.960418	ITGB3BP
rs2749106	63591600	0.0416688	0.960418	ITGB3BP
rs3009576	63443064	0.0416688	0.960418	ITGB3BP
rs34886184	63564729	0.0416688	0.960418	ITGB3BP
rs855303	63585628	0.0416688	0.960418	ITGB3BP
rs9436244	63529504	0.0416688	0.960418	ITGB3BP
rs11804843	63460622	0.0416641	0.960418	ITGB3BP
rs12724335	63456211	0.0416641	0.960418	ITGB3BP
rs12747542	63457142	0.0416641	0.960418	ITGB3BP
rs12754236	63480593	0.0416641	0.960418	ITGB3BP
rs17125090	63523233	0.0416641	0.960418	ITGB3BP
rs17391717	63491075	0.0416641	0.960418	ITGB3BP
rs17391823	63521194	0.0416641	0.960418	ITGB3BP
rs35888445	63511501	0.0416641	0.960418	ITGB3BP
rs36019623	63459570	0.0416641	0.960418	ITGB3BP
rs67831341	63498495	0.0416641	0.960418	ITGB3BP
rs10512627	124621375	0.179778	0.991929	KALRN
rs10512628	124622959	0.179778	0.991929	KALRN
rs13067286	124621246	0.179778	0.991929	KALRN
rs6771416	124620680	0.179778	0.991929	KALRN
rs7616881	124622305	0.179778	0.991929	KALRN
rs11920280	124618265	0.0505432	0.991929	KALRN
rs34605102	124618555	0.0505432	0.991929	KALRN
rs134613	29081396	0.459819	0.886311	KREMEN1
rs134637	29086688	0.0584558	0.886311	KREMEN1
rs134638	29086737	0.0584558	0.886311	KREMEN1
rs134626	29083902	0.0533211	0.886311	KREMEN1
rs5762980	29084917	0.0533211	0.886311	KREMEN1
rs134632	29085890	0.0166047	0.886311	KREMEN1
rs134635	29086167	0.0166047	0.886311	KREMEN1
rs134639	29087072	0.0166047	0.886311	KREMEN1
rs134645	29088622	0.0166047	0.886311	KREMEN1
rs2049939	29087932	0.0166047	0.886311	KREMEN1
rs134619	29082386	0.0143425	0.886311	KREMEN1
rs134620	29082772	0.0143425	0.886311	KREMEN1
rs134621	29082843	0.0143425	0.886311	KREMEN1
rs134623	29083205	0.0143425	0.886311	KREMEN1
rs134624	29083243	0.0143425	0.886311	KREMEN1
rs134625	29083896	0.0143425	0.886311	KREMEN1
rs134629	29084412	0.0143425	0.886311	KREMEN1
rs134630	29084754	0.0143425	0.886311	KREMEN1
rs20037	29081853	0.0143425	0.886311	KREMEN1
rs134599	29076875	0.0121275	0.886311	KREMEN1
rs134600	29076896	0.0121275	0.886311	KREMEN1
rs134601	29077507	0.0121275	0.886311	KREMEN1
rs134602	29077896	0.0121275	0.886311	KREMEN1
rs134604	29078089	0.0121275	0.886311	KREMEN1
rs7822059	97821545	0.108581	0.89218	LAPTM4B
rs112327154	97821171	0.0266548	0.89218	LAPTM4B
rs13253987	97820468	0.0266548	0.89218	LAPTM4B
rs62524123	97820727	0.0266548	0.89218	LAPTM4B
rs7843962	97821601	0.0266548	0.89218	LAPTM4B
rs149263924	97813710	0.0243677	0.89218	LAPTM4B
rs11781700	97818957	0.0164907	0.89218	LAPTM4B
rs11784577	97818520	0.0164907	0.89218	LAPTM4B
rs11785288	97818690	0.0164907	0.89218	LAPTM4B
rs13261020	97812011	0.0164907	0.89218	LAPTM4B
rs2331655	97807267	0.0164907	0.89218	LAPTM4B
rs2331657	97816304	0.0164907	0.89218	LAPTM4B
rs2331659	97816516	0.0164907	0.89218	LAPTM4B
rs3073521	97815987	0.0164907	0.89218	LAPTM4B
rs34542060	97807967	0.0164907	0.89218	LAPTM4B
rs56036725	97818358	0.0164907	0.89218	LAPTM4B
rs62524114	97819349	0.0164907	0.89218	LAPTM4B
rs6998969	97810544	0.0164907	0.89218	LAPTM4B
rs7002214	97817686	0.0164907	0.89218	LAPTM4B
rs7816307	97817923	0.0164907	0.89218	LAPTM4B
rs7818662	97815408	0.0164907	0.89218	LAPTM4B
rs7818775	97815303	0.0164907	0.89218	LAPTM4B
rs7831627	97814185	0.0164907	0.89218	LAPTM4B
rs77212229	97821267	0.0146094	0.89218	LAPTM4B
rs35974697	97820101	0.0117073	0.89218	LAPTM4B
rs36007296	97820161	0.0117073	0.89218	LAPTM4B
rs36028805	97819670	0.0117073	0.89218	LAPTM4B
rs2449530	97832822	0.0101527	0.89218	LAPTM4B
rs7843174	97813316	0.009228	0.89218	LAPTM4B
rs10504979	97812652	0.00904361	0.89218	LAPTM4B
rs11404306	97814767	0.00904361	0.89218	LAPTM4B
rs12542574	97807634	0.00904361	0.89218	LAPTM4B
rs13259176	97811949	0.00904361	0.89218	LAPTM4B
rs13272843	97816689	0.00904361	0.89218	LAPTM4B
rs150362855	97810391	0.00904361	0.89218	LAPTM4B
rs16892209	97812544	0.00904361	0.89218	LAPTM4B
rs16896248	97809780	0.00904361	0.89218	LAPTM4B
rs1872011	97807196	0.00904361	0.89218	LAPTM4B
rs2331656	97816301	0.00904361	0.89218	LAPTM4B
rs34054579	97812405	0.00904361	0.89218	LAPTM4B
rs35236211	97812043	0.00904361	0.89218	LAPTM4B
rs35469226	97813439	0.00904361	0.89218	LAPTM4B
rs4236845	97817265	0.00904361	0.89218	LAPTM4B
rs4291238	97816496	0.00904361	0.89218	LAPTM4B
rs4574820	97817484	0.00904361	0.89218	LAPTM4B
rs4735498	97811598	0.00904361	0.89218	LAPTM4B
rs4735499	97811621	0.00904361	0.89218	LAPTM4B
rs4735500	97811622	0.00904361	0.89218	LAPTM4B
rs4735501	97814901	0.00904361	0.89218	LAPTM4B
rs4735502	97814981	0.00904361	0.89218	LAPTM4B
rs4735503	97815068	0.00904361	0.89218	LAPTM4B
rs55809593	97809481	0.00904361	0.89218	LAPTM4B
rs62524083	97812756	0.00904361	0.89218	LAPTM4B
rs62524084	97812926	0.00904361	0.89218	LAPTM4B
rs62524085	97813006	0.00904361	0.89218	LAPTM4B
rs62524112	97816828	0.00904361	0.89218	LAPTM4B
rs62524113	97816931	0.00904361	0.89218	LAPTM4B
rs6468594	97808680	0.00904361	0.89218	LAPTM4B
rs6468595	97808723	0.00904361	0.89218	LAPTM4B
rs7813044	97814094	0.00904361	0.89218	LAPTM4B
rs7813751	97814455	0.00904361	0.89218	LAPTM4B
rs7815295	97809366	0.00904361	0.89218	LAPTM4B
rs7843011	97813082	0.00904361	0.89218	LAPTM4B
rs7843594	97813498	0.00904361	0.89218	LAPTM4B
rs7844304	97808278	0.00904361	0.89218	LAPTM4B
rs35778396	97820007	0.00690876	0.89218	LAPTM4B
rs35357093	97820103	0.00635855	0.89218	LAPTM4B
rs9693844	97809537	0.00618388	0.89218	LAPTM4B
rs35208727	97819986	0.00584235	0.89218	LAPTM4B
rs34885503	97819842	0.00211504	0.89218	LAPTM4B
rs1872015	97834710	0.00142704	0.89218	LAPTM4B
rs1872016	97834734	0.00142704	0.89218	LAPTM4B
rs1872017	97834763	0.00142704	0.89218	LAPTM4B
rs2449541	97834455	0.00142704	0.89218	LAPTM4B
rs2449550	97833525	0.00142704	0.89218	LAPTM4B
rs2512057	97833646	0.00142704	0.89218	LAPTM4B
rs11605386	18412173	0.414416	0.971987	LDHC
rs3740714	18412342	0.414416	0.971987	LDHC
rs112149204	18411394	0.0190185	0.971987	LDHC
rs139914313	18411458	0.0190185	0.971987	LDHC
rs150597811	18411450	0.0190185	0.971987	LDHC
rs4757655	18411308	0.0190185	0.971987	LDHC
rs4757656	18411312	0.0190185	0.971987	LDHC
rs4757660	18411912	0.0190185	0.971987	LDHC
rs58655904	18410643	0.0190185	0.971987	LDHC
rs3741921	6907285	0.500756	0.870581	LRRC23
rs57322338	6907879	0.178187	0.870581	LRRC23
rs1007924	6906751	0.157358	0.870581	LRRC23
rs2238116	6912451	0.0451131	0.870581	LRRC23
rs59114585	6911516	0.0451131	0.870581	LRRC23
rs2239163	6904912	0.023323	0.870581	LRRC23
rs34371942	6909611	0.0186956	0.870581	LRRC23
rs61054943	142767785	0.996711	0.823179	LYNX1
rs9973765	240897583	0.884914	0.947407	MAB21L4
rs12105931	240897712	0.0517026	0.947407	MAB21L4
rs6734159	240898096	0.0517026	0.947407	MAB21L4
rs3214186	6609511	0.992471	0.998268	MAN2B2
rs10829208	27190393	0.0766083	0.971579	MASTL
rs7086553	27191120	0.0766083	0.971579	MASTL
rs10764684	27184695	0.0730104	0.971579	MASTL
rs10829200	27174083	0.0730104	0.971579	MASTL
rs11015590	27180749	0.0730104	0.971579	MASTL
rs1981296	27170741	0.0730104	0.971579	MASTL
rs2887190	27176899	0.0730104	0.971579	MASTL
rs3758403	27154694	0.0730104	0.971579	MASTL
rs3758406	27156267	0.0730104	0.971579	MASTL
rs7068375	27165182	0.0730104	0.971579	MASTL
rs7070117	27161893	0.0730104	0.971579	MASTL
rs7900024	27155834	0.0730104	0.971579	MASTL
rs882474	27188936	0.0730104	0.971579	MASTL
rs1022706	118930841	0.00963334	0.840686	MCM9
rs1022707	118930806	0.00963334	0.840686	MCM9
rs1022708	118930741	0.00963334	0.840686	MCM9
rs11153782	118939690	0.00963334	0.840686	MCM9
rs11754618	118948324	0.00963334	0.840686	MCM9
rs11759256	118948082	0.00963334	0.840686	MCM9
rs11965951	118932105	0.00963334	0.840686	MCM9
rs11967231	118933723	0.00963334	0.840686	MCM9
rs11967232	118933732	0.00963334	0.840686	MCM9
rs139612448	118951849	0.00963334	0.840686	MCM9
rs1807979	118941611	0.00963334	0.840686	MCM9
rs1885125	118934914	0.00963334	0.840686	MCM9
rs2145569	118935814	0.00963334	0.840686	MCM9
rs2145570	118935834	0.00963334	0.840686	MCM9
rs2180860	118935972	0.00963334	0.840686	MCM9
rs34172642	118942171	0.00963334	0.840686	MCM9
rs3945959	118935885	0.00963334	0.840686	MCM9
rs4245502	118938986	0.00963334	0.840686	MCM9
rs4946369	118933085	0.00963334	0.840686	MCM9
rs4946370	118935286	0.00963334	0.840686	MCM9
rs4946372	118935574	0.00963334	0.840686	MCM9
rs4946373	118935670	0.00963334	0.840686	MCM9
rs4946374	118935716	0.00963334	0.840686	MCM9
rs4946376	118938309	0.00963334	0.840686	MCM9
rs4946377	118938653	0.00963334	0.840686	MCM9
rs4946378	118938865	0.00963334	0.840686	MCM9
rs4946380	118947191	0.00963334	0.840686	MCM9
rs4946381	118947425	0.00963334	0.840686	MCM9
rs55978448	118943148	0.00963334	0.840686	MCM9
rs56022752	118943072	0.00963334	0.840686	MCM9
rs57580326	118936279	0.00963334	0.840686	MCM9
rs58360072	118948041	0.00963334	0.840686	MCM9
rs62422265	118933481	0.00963334	0.840686	MCM9
rs62422266	118935000	0.00963334	0.840686	MCM9
rs62422267	118935008	0.00963334	0.840686	MCM9
rs62422268	118935067	0.00963334	0.840686	MCM9
rs62422269	118935183	0.00963334	0.840686	MCM9
rs62422270	118935226	0.00963334	0.840686	MCM9
rs6569035	118944722	0.00963334	0.840686	MCM9
rs6901738	118945469	0.00963334	0.840686	MCM9
rs6903220	118944360	0.00963334	0.840686	MCM9
rs6903579	118940569	0.00963334	0.840686	MCM9
rs6904381	118940751	0.00963334	0.840686	MCM9
rs6910377	118941976	0.00963334	0.840686	MCM9
rs6916167	118942797	0.00963334	0.840686	MCM9
rs6916168	118942798	0.00963334	0.840686	MCM9
rs6916291	118942694	0.00963334	0.840686	MCM9
rs6916672	118942877	0.00963334	0.840686	MCM9
rs6918569	118930946	0.00963334	0.840686	MCM9
rs6918844	118930863	0.00963334	0.840686	MCM9
rs6919100	118931235	0.00963334	0.840686	MCM9
rs6923637	118944395	0.00963334	0.840686	MCM9
rs6923771	118937381	0.00963334	0.840686	MCM9
rs6928315	118937517	0.00963334	0.840686	MCM9
rs6928945	118937906	0.00963334	0.840686	MCM9
rs6932466	118950655	0.00963334	0.840686	MCM9
rs6933970	118942315	0.00963334	0.840686	MCM9
rs6935960	118939115	0.00963334	0.840686	MCM9
rs6939937	118935963	0.00963334	0.840686	MCM9
rs6940120	118945290	0.00963334	0.840686	MCM9
rs71746056	118935542	0.00963334	0.840686	MCM9
rs7381533	118941010	0.00963334	0.840686	MCM9
rs7381535	118941110	0.00963334	0.840686	MCM9
rs7381546	118940917	0.00963334	0.840686	MCM9
rs74434000	118943836	0.00963334	0.840686	MCM9
rs7741149	118936883	0.00963334	0.840686	MCM9
rs77458334	118947264	0.00963334	0.840686	MCM9
rs7758729	118943601	0.00963334	0.840686	MCM9
rs7758832	118943869	0.00963334	0.840686	MCM9
rs7758849	118943940	0.00963334	0.840686	MCM9
rs7758862	118943966	0.00963334	0.840686	MCM9
rs7759423	118936811	0.00963334	0.840686	MCM9
rs79069475	118938496	0.00963334	0.840686	MCM9
rs79855181	118951860	0.00963334	0.840686	MCM9
rs9320669	118932193	0.00963334	0.840686	MCM9
rs9320670	118932252	0.00963334	0.840686	MCM9
rs9320671	118932517	0.00963334	0.840686	MCM9
rs9372517	118946546	0.00963334	0.840686	MCM9
rs9374759	118933764	0.00963334	0.840686	MCM9
rs9374763	118946357	0.00963334	0.840686	MCM9
rs9374764	118946386	0.00963334	0.840686	MCM9
rs9374765	118946395	0.00963334	0.840686	MCM9
rs9374767	118946908	0.00963334	0.840686	MCM9
rs9385060	118946340	0.00963334	0.840686	MCM9
rs9385061	118948261	0.00963334	0.840686	MCM9
rs9387610	118933838	0.00963334	0.840686	MCM9
rs9387611	118938113	0.00963334	0.840686	MCM9
rs9387612	118938158	0.00963334	0.840686	MCM9
rs9387613	118945973	0.00963334	0.840686	MCM9
rs9387614	118946545	0.00963334	0.840686	MCM9
rs9387617	118949618	0.00963334	0.840686	MCM9
rs9401103	118946228	0.00963334	0.840686	MCM9
rs9401104	118950041	0.00963334	0.840686	MCM9
rs9401105	118950109	0.00963334	0.840686	MCM9
rs9401106	118952423	0.00963334	0.840686	MCM9
rs9489563	118944095	0.00963334	0.840686	MCM9
rs9489569	118945860	0.00963334	0.840686	MCM9
rs9489570	118947633	0.00963334	0.840686	MCM9
rs9689589	118932086	0.00963334	0.840686	MCM9
rs9349050	37695848	0.871842	0.84745	MDGA1
rs6938061	37706563	0.108343	0.84745	MDGA1
rs10232945	130487677	0.662423	0.961217	MEST
rs10228972	130486822	0.12482	0.961217	MEST
rs10232290	130487019	0.12482	0.961217	MEST
rs3800564	130486107	0.084683	0.961217	MEST
rs10225983	73844420	0.0389363	0.960339	METTL27
rs10233067	73842590	0.0389363	0.960339	METTL27
rs10276377	73842508	0.0389363	0.960339	METTL27
rs10282443	73838913	0.0389363	0.960339	METTL27
rs1127156	73832166	0.0389363	0.960339	METTL27
rs13223593	73839442	0.0389363	0.960339	METTL27
rs13232463	73834969	0.0389363	0.960339	METTL27
rs13241921	73840482	0.0389363	0.960339	METTL27
rs13246460	73834835	0.0389363	0.960339	METTL27
rs13247441	73838813	0.0389363	0.960339	METTL27
rs1989670	73837589	0.0389363	0.960339	METTL27
rs4286826	73834256	0.0389363	0.960339	METTL27
rs4314544	73840922	0.0389363	0.960339	METTL27
rs4333464	73840835	0.0389363	0.960339	METTL27
rs4458741	73830849	0.0389363	0.960339	METTL27
rs4473910	73834332	0.0389363	0.960339	METTL27
rs4484569	73838570	0.0389363	0.960339	METTL27
rs6974182	73828647	0.0389363	0.960339	METTL27
rs6974378	73828809	0.0389363	0.960339	METTL27
rs7786850	73834242	0.0389363	0.960339	METTL27
rs7793169	73829884	0.0389363	0.960339	METTL27
rs7811317	73838777	0.0389363	0.960339	METTL27
rs7811711	73838770	0.0389363	0.960339	METTL27
rs8629	73831189	0.0389363	0.960339	METTL27
rs7809965	73843571	0.0274551	0.960339	METTL27
rs2516400	31513328	0.0687838	0.971047	MICB
rs2844499	31508136	0.0536545	0.971047	MICB
rs1051788	31506223	0.0396483	0.971047	MICB
rs1065075	31505784	0.0396483	0.971047	MICB
rs2246618	31511209	0.0396483	0.971047	MICB
rs2516412	31494544	0.0396483	0.971047	MICB
rs2516427	31503677	0.0396483	0.971047	MICB
rs2516499	31495548	0.0396483	0.971047	MICB
rs2534660	31504346	0.0396483	0.971047	MICB
rs2534672	31497781	0.0396483	0.971047	MICB
rs2534673	31497713	0.0396483	0.971047	MICB
rs2534675	31497021	0.0396483	0.971047	MICB
rs2534679	31496013	0.0396483	0.971047	MICB
rs2534680	31495800	0.0396483	0.971047	MICB
rs2534684	31494895	0.0396483	0.971047	MICB
rs2534685	31494468	0.0396483	0.971047	MICB
rs2844501	31496588	0.0396483	0.971047	MICB
rs2855802	31499334	0.0396483	0.971047	MICB
rs2855803	31499393	0.0396483	0.971047	MICB
rs2855804	31499588	0.0396483	0.971047	MICB
rs2855808	31501891	0.0396483	0.971047	MICB
rs2855816	31499102	0.0396483	0.971047	MICB
rs2855817	31499108	0.0396483	0.971047	MICB
rs5760119	23924644	0.499995	0.992308	MIF
rs5760120	23924680	0.499995	0.992308	MIF
rs9370260	54056876	0.961166	0.995791	MLIP
rs6060341	35275830	0.255548	0.992675	MMP24OS
rs591590	35278225	0.255545	0.992675	MMP24OS
rs627106	35278226	0.255545	0.992675	MMP24OS
rs2297789	35279445	0.109097	0.992675	MMP24OS
rs6120889	35282250	0.109097	0.992675	MMP24OS
rs7770652	44116947	0.0838573	0.807573	MRPL14
rs4714739	44096327	0.0751304	0.807573	MRPL14
rs1321097	44109619	0.0393728	0.807573	MRPL14
rs1891440	44123428	0.0393728	0.807573	MRPL14
rs2144510	44119846	0.0393728	0.807573	MRPL14
rs34631848	44115189	0.0393728	0.807573	MRPL14
rs4714745	44109932	0.0393728	0.807573	MRPL14
rs4714748	44122431	0.0393728	0.807573	MRPL14
rs6883	44113981	0.0393728	0.807573	MRPL14
rs713049	44124107	0.0393728	0.807573	MRPL14
rs7756283	44109043	0.0393728	0.807573	MRPL14
rs9381289	44102396	0.0393728	0.807573	MRPL14
rs9394985	44113269	0.0393728	0.807573	MRPL14
rs9462964	44133539	0.0393728	0.807573	MRPL14
rs4714741	44098142	0.0342316	0.807573	MRPL14
rs4714755	44138241	0.0335279	0.807573	MRPL14
rs4711767	44114250	0.0244622	0.807573	MRPL14
rs910616	44107239	0.0221733	0.807573	MRPL14
rs1569889	44121398	0.0203792	0.807573	MRPL14
rs1935611	44126005	0.0203792	0.807573	MRPL14
rs2396167	44120806	0.0203792	0.807573	MRPL14
rs4714742	44105233	0.0203792	0.807573	MRPL14
rs4714747	44112191	0.0203792	0.807573	MRPL14
rs6918252	44124800	0.0203792	0.807573	MRPL14
rs877111	44108324	0.0203792	0.807573	MRPL14
rs9357430	44112648	0.0203792	0.807573	MRPL14
rs3841315	44134835	0.0164513	0.807573	MRPL14
rs9369452	44105422	0.0158305	0.807573	MRPL14
rs4714751	44133807	0.00778308	0.807573	MRPL14
rs12212365	44131824	0.00769963	0.807573	MRPL14
rs7252571	17309039	0.227719	0.913165	MRPL34
rs35371421	17302138	0.163423	0.913165	MRPL34
rs10651952	17305038	0.159708	0.913165	MRPL34
rs6903	17306756	0.159708	0.913165	MRPL34
rs7250482	17304316	0.159708	0.913165	MRPL34
rs8100448	17311593	0.0138521	0.913165	MRPL34
rs11668755	17305548	0.0133377	0.913165	MRPL34
rs11673077	17307502	0.0133377	0.913165	MRPL34
rs34139410	17303977	0.0133377	0.913165	MRPL34
rs71338624	17303968	0.0133377	0.913165	MRPL34
rs7260573	17308238	0.0133377	0.913165	MRPL34
rs71479547	73769885	0.495534	0.997841	MRPL48
rs9666165	73777201	0.495534	0.997841	MRPL48
rs8067326	75265195	0.526302	0.984242	MRPS7
rs8075276	75261905	0.473654	0.984242	MRPS7
rs408626	80655314	0.992522	0.937653	MSH3
rs2184161	62201219	0.567122	0.995561	MTG2
rs2184159	62201254	0.316579	0.995561	MTG2
rs2151511	62201388	0.0706892	0.995561	MTG2
rs10953305	100894947	0.494317	0.993442	MUC3A
rs3847063	100900855	0.494317	0.993442	MUC3A
rs198461	61756894	1	0.999159	MYRF
rs2622026	131476167	0.0452093	0.942088	MZT2A
rs10168805	131491602	0.0187632	0.942088	MZT2A
rs10177018	131474601	0.0187632	0.942088	MZT2A
rs10177130	131474675	0.0187632	0.942088	MZT2A
rs10179938	131491059	0.0187632	0.942088	MZT2A
rs10194170	131474824	0.0187632	0.942088	MZT2A
rs10197235	131472459	0.0187632	0.942088	MZT2A
rs111420543	131475540	0.0187632	0.942088	MZT2A
rs111626841	131480713	0.0187632	0.942088	MZT2A
rs112214959	131475220	0.0187632	0.942088	MZT2A
rs112775275	131475706	0.0187632	0.942088	MZT2A
rs113925755	131474835	0.0187632	0.942088	MZT2A
rs11553182	131484131	0.0187632	0.942088	MZT2A
rs13386312	131488733	0.0187632	0.942088	MZT2A
rs13390431	131490260	0.0187632	0.942088	MZT2A
rs13390533	131490367	0.0187632	0.942088	MZT2A
rs13401363	131490418	0.0187632	0.942088	MZT2A
rs141836251	131478046	0.0187632	0.942088	MZT2A
rs143093208	131475425	0.0187632	0.942088	MZT2A
rs149054661	131475231	0.0187632	0.942088	MZT2A
rs16856655	131481227	0.0187632	0.942088	MZT2A
rs200788139	131475946	0.0187632	0.942088	MZT2A
rs2313999	131479790	0.0187632	0.942088	MZT2A
rs28462272	131479577	0.0187632	0.942088	MZT2A
rs28581491	131482976	0.0187632	0.942088	MZT2A
rs28721291	131483407	0.0187632	0.942088	MZT2A
rs3900678	131482474	0.0187632	0.942088	MZT2A
rs4065349	131479073	0.0187632	0.942088	MZT2A
rs57354961	131483947	0.0187632	0.942088	MZT2A
rs59539470	131490763	0.0187632	0.942088	MZT2A
rs59965165	131483879	0.0187632	0.942088	MZT2A
rs60249823	131483589	0.0187632	0.942088	MZT2A
rs61104316	131483562	0.0187632	0.942088	MZT2A
rs6430826	131486532	0.0187632	0.942088	MZT2A
rs6724844	131484879	0.0187632	0.942088	MZT2A
rs6725894	131474478	0.0187632	0.942088	MZT2A
rs6731490	131477274	0.0187632	0.942088	MZT2A
rs6731616	131477413	0.0187632	0.942088	MZT2A
rs6733444	131487216	0.0187632	0.942088	MZT2A
rs6741788	131484892	0.0187632	0.942088	MZT2A
rs6759520	131474232	0.0187632	0.942088	MZT2A
rs7423999	131479483	0.0187632	0.942088	MZT2A
rs7424438	131479486	0.0187632	0.942088	MZT2A
rs7424497	131479799	0.0187632	0.942088	MZT2A
rs75021268	131484158	0.0187632	0.942088	MZT2A
rs7561542	131476103	0.0187632	0.942088	MZT2A
rs7561673	131476182	0.0187632	0.942088	MZT2A
rs7561684	131476212	0.0187632	0.942088	MZT2A
rs7571932	131476033	0.0187632	0.942088	MZT2A
rs7571947	131476081	0.0187632	0.942088	MZT2A
rs7221247	82447082	0.0928648	0.961415	NARF
rs7226245	82445239	0.0928648	0.961415	NARF
rs12936904	82452932	0.0712817	0.961415	NARF
rs11077995	82461848	0.0667262	0.961415	NARF
rs57897512	82459865	0.0667262	0.961415	NARF
rs7406694	82469464	0.0667262	0.961415	NARF
rs9890316	82485433	0.0521572	0.961415	NARF
rs28365944	82458501	0.0431242	0.961415	NARF
rs28365945	82458523	0.0431242	0.961415	NARF
rs28365946	82458529	0.0431242	0.961415	NARF
rs28374204	82458516	0.0431242	0.961415	NARF
rs7218534	82458105	0.0431242	0.961415	NARF
rs6502111	82453954	0.0377284	0.961415	NARF
rs3214988	82468674	0.0299635	0.961415	NARF
rs66471221	82469941	0.0299635	0.961415	NARF
rs7222259	82471251	0.0299635	0.961415	NARF
rs12941490	82458193	0.0127434	0.961415	NARF
rs28365943	82458214	0.0127434	0.961415	NARF
rs3840864	82457890	0.0127434	0.961415	NARF
rs4789689	82456887	0.0127434	0.961415	NARF
rs4789690	82457073	0.0127434	0.961415	NARF
rs4789691	82457125	0.0127434	0.961415	NARF
rs4789692	82457366	0.0127434	0.961415	NARF
rs6502113	82457439	0.0127434	0.961415	NARF
rs10888639	39031147	0.208634	0.984875	NDUFS5
rs11205591	39035577	0.208634	0.984875	NDUFS5
rs3768324	39026790	0.208634	0.984875	NDUFS5
rs76289224	39028109	0.208634	0.984875	NDUFS5
rs6682588	39056137	0.0355455	0.984875	NDUFS5
rs146087529	39017244	0.0199479	0.984875	NDUFS5
rs10888650	39041489	0.0138034	0.984875	NDUFS5
rs11205599	39040469	0.0138034	0.984875	NDUFS5
rs12032116	39054637	0.0138034	0.984875	NDUFS5
rs12034567	39054880	0.0138034	0.984875	NDUFS5
rs2889683	39023076	0.0138034	0.984875	NDUFS5
rs13125949	48024543	0.0807684	0.936371	NIPAL1
rs13142905	48023281	0.0807684	0.936371	NIPAL1
rs139526290	48024331	0.0807684	0.936371	NIPAL1
rs11733284	48026080	0.0724998	0.936371	NIPAL1
rs13120847	48028019	0.0724998	0.936371	NIPAL1
rs13146880	48029482	0.0724998	0.936371	NIPAL1
rs4694879	48030339	0.0724998	0.936371	NIPAL1
rs4695328	48028272	0.0724998	0.936371	NIPAL1
rs56823786	48029885	0.0724998	0.936371	NIPAL1
rs6811245	48026772	0.0724998	0.936371	NIPAL1
rs6832503	48026425	0.0724998	0.936371	NIPAL1
rs6835057	48026960	0.0724998	0.936371	NIPAL1
rs321628	48014858	0.0215705	0.936371	NIPAL1
rs321630	48016153	0.0215705	0.936371	NIPAL1
rs321631	48016212	0.0215705	0.936371	NIPAL1
rs55709104	16202631	0.999922	0.985514	NOMO3
rs806111	5993570	0.999855	0.998992	NPHP4
rs150747026	74745961	0.12834	0.966061	NSA2
rs10515192	74761889	0.0272394	0.966061	NSA2
rs10515194	74764026	0.0272394	0.966061	NSA2
rs113681590	74706689	0.0272394	0.966061	NSA2
rs142547489	74772422	0.0272394	0.966061	NSA2
rs147606872	74753511	0.0272394	0.966061	NSA2
rs16872220	74722949	0.0272394	0.966061	NSA2
rs16872231	74736291	0.0272394	0.966061	NSA2
rs3058458	74726280	0.0272394	0.966061	NSA2
rs57549677	74729325	0.0272394	0.966061	NSA2
rs59475923	74758967	0.0272394	0.966061	NSA2
rs6453076	74737876	0.0272394	0.966061	NSA2
rs6453079	74745504	0.0272394	0.966061	NSA2
rs6870806	74771711	0.0272394	0.966061	NSA2
rs6873912	74752325	0.0272394	0.966061	NSA2
rs6873998	74750831	0.0272394	0.966061	NSA2
rs6877188	74735700	0.0272394	0.966061	NSA2
rs6882035	74769996	0.0272394	0.966061	NSA2
rs6883278	74774228	0.0272394	0.966061	NSA2
rs6883420	74774309	0.0272394	0.966061	NSA2
rs6884338	74754446	0.0272394	0.966061	NSA2
rs6894177	74729044	0.0272394	0.966061	NSA2
rs6898684	74752138	0.0272394	0.966061	NSA2
rs72764643	74727815	0.0272394	0.966061	NSA2
rs72764647	74742164	0.0272394	0.966061	NSA2
rs72764648	74742272	0.0272394	0.966061	NSA2
rs72764654	74763883	0.0272394	0.966061	NSA2
rs72764656	74765456	0.0272394	0.966061	NSA2
rs72764657	74768515	0.0272394	0.966061	NSA2
rs7713812	74737072	0.0272394	0.966061	NSA2
rs7732440	74743438	0.0272394	0.966061	NSA2
rs7732843	74738420	0.0272394	0.966061	NSA2
rs35051135	41836371	0.324617	0.921629	NT5C3B
rs9896980	41836970	0.324617	0.921629	NT5C3B
rs9897034	41836332	0.324617	0.921629	NT5C3B
rs12368209	103787094	1	0.962869	NT5DC3
rs11227866	67623239	0.500002	0.898557	NUDT8
rs2126717	67621381	0.15744	0.898557	NUDT8
rs2187002	67622061	0.15744	0.898557	NUDT8
rs74360793	67613297	0.0890389	0.898557	NUDT8
rs2447596	67617790	0.051756	0.898557	NUDT8
rs10834966	3728355	0.25295	0.852267	NUP98
rs10834967	3728466	0.139711	0.852267	NUP98
rs10834920	3710078	0.106379	0.852267	NUP98
rs12292538	3708888	0.106379	0.852267	NUP98
rs11029446	3719344	0.0812852	0.852267	NUP98
rs12279623	3790934	0.0613961	0.852267	NUP98
rs11029681	3763661	0.0314035	0.852267	NUP98
rs61877603	3755876	0.0314035	0.852267	NUP98
rs12273346	3792133	0.0242171	0.852267	NUP98
rs12284204	3790935	0.0227751	0.852267	NUP98
rs34607553	3755820	0.0218516	0.852267	NUP98
rs11029620	3750694	0.0206822	0.852267	NUP98
rs7924315	3790295	0.0167027	0.852267	NUP98
rs34960028	3791877	0.0139602	0.852267	NUP98
rs7931173	3723935	0.0120798	0.852267	NUP98
rs7111312	3749970	0.009923	0.852267	NUP98
rs9328723	909251	0.236992	0.989872	NXN
rs9893860	909293	0.236992	0.989872	NXN
rs9915645	909294	0.236992	0.989872	NXN
rs9328722	909164	0.150881	0.989872	NXN
rs11652877	908269	0.0153398	0.989872	NXN
rs2132512	907319	0.0153398	0.989872	NXN
rs2132513	907409	0.0153398	0.989872	NXN
rs6598832	908727	0.0153398	0.989872	NXN
rs6598833	908728	0.0153398	0.989872	NXN
rs76195060	908166	0.0153398	0.989872	NXN
rs334048	178152266	0.787138	0.886551	OSBPL6
rs17638592	178153269	0.210198	0.886551	OSBPL6
rs112385337	44024618	0.967127	0.998548	PARVB
rs10037298	140188111	0.0173586	0.908071	PFDN1
rs10037401	140189177	0.0173586	0.908071	PFDN1
rs10038443	140185443	0.0173586	0.908071	PFDN1
rs10039051	140185561	0.0173586	0.908071	PFDN1
rs10045140	140189179	0.0173586	0.908071	PFDN1
rs10045510	140233603	0.0173586	0.908071	PFDN1
rs10055141	140237024	0.0173586	0.908071	PFDN1
rs10060203	140219734	0.0173586	0.908071	PFDN1
rs10067867	140179335	0.0173586	0.908071	PFDN1
rs10477319	140224289	0.0173586	0.908071	PFDN1
rs12188839	140241812	0.0173586	0.908071	PFDN1
rs12717954	140215714	0.0173586	0.908071	PFDN1
rs13163983	140242987	0.0173586	0.908071	PFDN1
rs13172695	140188900	0.0173586	0.908071	PFDN1
rs13175751	140221512	0.0173586	0.908071	PFDN1
rs13180777	140228278	0.0173586	0.908071	PFDN1
rs13188675	140227133	0.0173586	0.908071	PFDN1
rs13353859	140240870	0.0173586	0.908071	PFDN1
rs13359060	140225617	0.0173586	0.908071	PFDN1
rs17118759	140237822	0.0173586	0.908071	PFDN1
rs2053058	140183898	0.0173586	0.908071	PFDN1
rs2337131	140191703	0.0173586	0.908071	PFDN1
rs28450136	140218505	0.0173586	0.908071	PFDN1
rs28477538	140186049	0.0173586	0.908071	PFDN1
rs28573694	140230366	0.0173586	0.908071	PFDN1
rs28631068	140186156	0.0173586	0.908071	PFDN1
rs28722951	140230367	0.0173586	0.908071	PFDN1
rs34386219	140182321	0.0173586	0.908071	PFDN1
rs34675890	140242687	0.0173586	0.908071	PFDN1
rs35277761	140229824	0.0173586	0.908071	PFDN1
rs35290793	140176913	0.0173586	0.908071	PFDN1
rs3822739	140246158	0.0173586	0.908071	PFDN1
rs4044173	140173989	0.0173586	0.908071	PFDN1
rs4912704	140172007	0.0173586	0.908071	PFDN1
rs4912707	140244876	0.0173586	0.908071	PFDN1
rs4913071	140180913	0.0173586	0.908071	PFDN1
rs4913072	140228768	0.0173586	0.908071	PFDN1
rs4913073	140233269	0.0173586	0.908071	PFDN1
rs4913074	140233982	0.0173586	0.908071	PFDN1
rs4913078	140247095	0.0173586	0.908071	PFDN1
rs5871727	140190327	0.0173586	0.908071	PFDN1
rs59453051	140178627	0.0173586	0.908071	PFDN1
rs6872766	140216029	0.0173586	0.908071	PFDN1
rs6872923	140216087	0.0173586	0.908071	PFDN1
rs6878006	140216166	0.0173586	0.908071	PFDN1
rs7203	140245285	0.0173586	0.908071	PFDN1
rs7204	140245279	0.0173586	0.908071	PFDN1
rs72798805	140188469	0.0173586	0.908071	PFDN1
rs7703595	140231605	0.0173586	0.908071	PFDN1
rs7704262	140231458	0.0173586	0.908071	PFDN1
rs7705999	140196464	0.0173586	0.908071	PFDN1
rs7707814	140204143	0.0173586	0.908071	PFDN1
rs7710268	140196762	0.0173586	0.908071	PFDN1
rs7715649	140225932	0.0173586	0.908071	PFDN1
rs7722986	140237801	0.0173586	0.908071	PFDN1
rs7280542	37072695	0.118292	0.954335	PIGP
rs2154535	37116608	0.105963	0.954335	PIGP
rs1473807	37100873	0.0381541	0.954335	PIGP
rs150051748	37110038	0.0381541	0.954335	PIGP
rs2032088	37105030	0.0381541	0.954335	PIGP
rs3819262	37088590	0.0381541	0.954335	PIGP
rs4817848	37097423	0.0381541	0.954335	PIGP
rs56342756	37088591	0.0381541	0.954335	PIGP
rs6517403	37107969	0.0381541	0.954335	PIGP
rs8131246	37079626	0.0381541	0.954335	PIGP
rs9680286	37112694	0.0381541	0.954335	PIGP
rs9983781	37110417	0.0381541	0.954335	PIGP
rs2249828	37060321	0.0368688	0.954335	PIGP
rs2898314	37212760	0.0235239	0.954335	PIGP
rs9636913	37217281	0.0235239	0.954335	PIGP
rs9976368	37215615	0.0235239	0.954335	PIGP
rs3737424	37125004	0.0210587	0.954335	PIGP
rs56356911	37211327	0.0186965	0.954335	PIGP
rs8130549	37114987	0.0179757	0.954335	PIGP
rs10470176	37132200	0.0160943	0.954335	PIGP
rs1115639	37137053	0.0160943	0.954335	PIGP
rs1344046	37144840	0.0160943	0.954335	PIGP
rs2000419	37139616	0.0160943	0.954335	PIGP
rs2835625	37140141	0.0160943	0.954335	PIGP
rs2835626	37140398	0.0160943	0.954335	PIGP
rs4453760	37136017	0.0160943	0.954335	PIGP
rs2835637	37161165	0.014577	0.954335	PIGP
rs2835648	37175752	0.014577	0.954335	PIGP
rs2835655	37191424	0.014577	0.954335	PIGP
rs62226463	37163509	0.014577	0.954335	PIGP
rs9636911	37175082	0.014577	0.954335	PIGP
rs3732419	119477487	0.217247	0.977229	POGLUT1
rs56224714	119473338	0.217247	0.977229	POGLUT1
rs6794833	119472551	0.217247	0.977229	POGLUT1
rs6799691	119477934	0.217247	0.977229	POGLUT1
rs4687860	119475584	0.0214827	0.977229	POGLUT1
rs6414282	119476435	0.0214827	0.977229	POGLUT1
rs6777535	119478169	0.0214827	0.977229	POGLUT1
rs7430798	119439132	0.0214827	0.977229	POGLUT1
rs41267029	39748695	0.0754914	0.912089	PPIE
rs56064244	39748218	0.0754914	0.912089	PPIE
rs58589165	39747998	0.0754914	0.912089	PPIE
rs7518431	39749272	0.0754914	0.912089	PPIE
rs12094291	39760374	0.0642289	0.912089	PPIE
rs11809515	39739654	0.0588695	0.912089	PPIE
rs2274949	39755395	0.0588695	0.912089	PPIE
rs35698130	39739455	0.0588695	0.912089	PPIE
rs3738673	39739151	0.0588695	0.912089	PPIE
rs6664570	39740626	0.0588695	0.912089	PPIE
rs6670841	39754612	0.0588695	0.912089	PPIE
rs7513045	39738494	0.0588695	0.912089	PPIE
rs7547787	39755134	0.0588695	0.912089	PPIE
rs7548120	39738752	0.0588695	0.912089	PPIE
rs9787249	39747206	0.0588695	0.912089	PPIE
rs2899830	35124393	0.40643	0.97855	PPP2R3C
rs28765972	35129164	0.0883969	0.97855	PPP2R3C
rs56027918	35127078	0.0876375	0.97855	PPP2R3C
rs7158416	35127943	0.0876375	0.97855	PPP2R3C
rs7158634	35128133	0.0876375	0.97855	PPP2R3C
rs74970204	35133067	0.0876375	0.97855	PPP2R3C
rs8014091	35130717	0.0876375	0.97855	PPP2R3C
rs1056879	35121968	0.0173755	0.97855	PPP2R3C
rs11399727	82916505	0.115739	0.87353	PRCP
rs11821274	82915630	0.115739	0.87353	PRCP
rs147085800	82911448	0.115739	0.87353	PRCP
rs61421578	82922647	0.115739	0.87353	PRCP
rs61501448	82928299	0.115739	0.87353	PRCP
rs75885816	82908335	0.115739	0.87353	PRCP
rs7930344	82910772	0.115739	0.87353	PRCP
rs7943593	82901653	0.0810352	0.87353	PRCP
rs11821336	82915870	0.051558	0.87353	PRCP
rs12282547	82900920	0.024974	0.87353	PRCP
rs28362590	177304451	0.999999	0.99971	PRELID1
rs1623927	107053498	0.329544	0.982529	PRMT6
rs1730850	107055366	0.329544	0.982529	PRMT6
rs2232015	107056636	0.329317	0.982529	PRMT6
rs1344477	29567360	0.482914	0.993892	PRR15
rs2302618	29566359	0.474164	0.993892	PRR15
rs10412446	49564251	0.375465	0.963422	PRRG2
rs7254718	49569969	0.344149	0.963422	PRRG2
rs7249925	49590315	0.159979	0.963422	PRRG2
rs11878568	49592704	0.0752073	0.963422	PRRG2
rs4837796	120848010	0.890353	0.993617	PSMD5
rs34025993	120754294	0.0543382	0.993617	PSMD5
rs72298225	120843433	0.0539205	0.993617	PSMD5
rs12740374	109274968	0.999997	0.994627	PSRC1
rs235314	44851537	1	0.991968	PTTG1IP
rs11046070	21460214	0.131116	0.847183	PYROXD1
rs1024733	21444670	0.00909217	0.847183	PYROXD1
rs10707147	21446323	0.00909217	0.847183	PYROXD1
rs10770813	21454580	0.00909217	0.847183	PYROXD1
rs10770814	21462384	0.00909217	0.847183	PYROXD1
rs10770815	21463371	0.00909217	0.847183	PYROXD1
rs10841815	21451584	0.00909217	0.847183	PYROXD1
rs10841816	21452543	0.00909217	0.847183	PYROXD1
rs11046055	21447705	0.00909217	0.847183	PYROXD1
rs11046056	21447803	0.00909217	0.847183	PYROXD1
rs11046057	21447904	0.00909217	0.847183	PYROXD1
rs11046058	21447906	0.00909217	0.847183	PYROXD1
rs11046059	21447919	0.00909217	0.847183	PYROXD1
rs11046060	21447931	0.00909217	0.847183	PYROXD1
rs11046064	21452432	0.00909217	0.847183	PYROXD1
rs11046065	21452552	0.00909217	0.847183	PYROXD1
rs11046069	21460180	0.00909217	0.847183	PYROXD1
rs11046073	21463664	0.00909217	0.847183	PYROXD1
rs11608659	21442558	0.00909217	0.847183	PYROXD1
rs11608682	21442699	0.00909217	0.847183	PYROXD1
rs12423128	21458538	0.00909217	0.847183	PYROXD1
rs12423151	21458696	0.00909217	0.847183	PYROXD1
rs12831608	21466697	0.00909217	0.847183	PYROXD1
rs1476904	21445950	0.00909217	0.847183	PYROXD1
rs1476906	21447472	0.00909217	0.847183	PYROXD1
rs1476907	21447509	0.00909217	0.847183	PYROXD1
rs151311552	21461207	0.00909217	0.847183	PYROXD1
rs1963330	21445261	0.00909217	0.847183	PYROXD1
rs2159947	21448557	0.00909217	0.847183	PYROXD1
rs2159948	21448569	0.00909217	0.847183	PYROXD1
rs2192179	21454745	0.00909217	0.847183	PYROXD1
rs2192182	21455077	0.00909217	0.847183	PYROXD1
rs2215734	21451174	0.00909217	0.847183	PYROXD1
rs2302499	21455798	0.00909217	0.847183	PYROXD1
rs2302500	21455957	0.00909217	0.847183	PYROXD1
rs3061475	21444679	0.00909217	0.847183	PYROXD1
rs3213211	21462323	0.00909217	0.847183	PYROXD1
rs34521099	21441744	0.00909217	0.847183	PYROXD1
rs35887573	21463132	0.00909217	0.847183	PYROXD1
rs3759229	21452223	0.00909217	0.847183	PYROXD1
rs3782660	21462730	0.00909217	0.847183	PYROXD1
rs3825287	21461969	0.00909217	0.847183	PYROXD1
rs3825289	21462314	0.00909217	0.847183	PYROXD1
rs3834485	21449364	0.00909217	0.847183	PYROXD1
rs3919535	21454578	0.00909217	0.847183	PYROXD1
rs4388943	21456288	0.00909217	0.847183	PYROXD1
rs4388944	21456354	0.00909217	0.847183	PYROXD1
rs4423237	21457480	0.00909217	0.847183	PYROXD1
rs4551820	21457310	0.00909217	0.847183	PYROXD1
rs4762827	21450104	0.00909217	0.847183	PYROXD1
rs4762828	21450105	0.00909217	0.847183	PYROXD1
rs4762829	21450410	0.00909217	0.847183	PYROXD1
rs4762830	21452573	0.00909217	0.847183	PYROXD1
rs4762831	21452584	0.00909217	0.847183	PYROXD1
rs4762832	21452688	0.00909217	0.847183	PYROXD1
rs4762833	21452821	0.00909217	0.847183	PYROXD1
rs61926294	21457759	0.00909217	0.847183	PYROXD1
rs61926296	21460379	0.00909217	0.847183	PYROXD1
rs6487224	21441395	0.00909217	0.847183	PYROXD1
rs6487226	21457093	0.00909217	0.847183	PYROXD1
rs6487227	21457190	0.00909217	0.847183	PYROXD1
rs6487228	21459047	0.00909217	0.847183	PYROXD1
rs6487229	21459249	0.00909217	0.847183	PYROXD1
rs6487230	21459403	0.00909217	0.847183	PYROXD1
rs6487231	21459429	0.00909217	0.847183	PYROXD1
rs7133827	21459772	0.00909217	0.847183	PYROXD1
rs7134243	21450867	0.00909217	0.847183	PYROXD1
rs7136175	21442130	0.00909217	0.847183	PYROXD1
rs7136257	21442456	0.00909217	0.847183	PYROXD1
rs7136265	21442480	0.00909217	0.847183	PYROXD1
rs7137034	21442790	0.00909217	0.847183	PYROXD1
rs7138359	21460933	0.00909217	0.847183	PYROXD1
rs714356	21444312	0.00909217	0.847183	PYROXD1
rs714357	21444580	0.00909217	0.847183	PYROXD1
rs7294351	21455585	0.00909217	0.847183	PYROXD1
rs7295417	21443181	0.00909217	0.847183	PYROXD1
rs7295570	21443507	0.00909217	0.847183	PYROXD1
rs7296273	21443857	0.00909217	0.847183	PYROXD1
rs7303408	21450885	0.00909217	0.847183	PYROXD1
rs7308263	21443084	0.00909217	0.847183	PYROXD1
rs7309539	21460989	0.00909217	0.847183	PYROXD1
rs7310953	21448828	0.00909217	0.847183	PYROXD1
rs74962202	21457163	0.00909217	0.847183	PYROXD1
rs7964140	21456799	0.00909217	0.847183	PYROXD1
rs7964568	21456973	0.00909217	0.847183	PYROXD1
rs7966443	21453197	0.00909217	0.847183	PYROXD1
rs7980058	21453193	0.00909217	0.847183	PYROXD1
rs7980474	21453835	0.00909217	0.847183	PYROXD1
rs7980957	21454064	0.00909217	0.847183	PYROXD1
rs9669356	21466474	0.00909217	0.847183	PYROXD1
rs11046050	21440875	0.00391183	0.847183	PYROXD1
rs1860949	21434380	0.00391183	0.847183	PYROXD1
rs2058464	21437687	0.00391183	0.847183	PYROXD1
rs11598689	98396270	0.993519	0.884048	PYROXD2
rs823144	205775418	0.301542	0.948214	RAB29
rs1775151	205776556	0.256436	0.948214	RAB29
rs863725	205782068	0.164632	0.948214	RAB29
rs947211	205783537	0.108159	0.948214	RAB29
rs885224	205783969	0.089311	0.948214	RAB29
rs1775158	205784547	0.0307769	0.948214	RAB29
rs196422	24541244	0.999993	0.999875	RCAN3
rs73922651	11395199	0.728626	0.835209	RGL3
rs10413578	11401697	0.0404353	0.835209	RGL3
rs3745688	11402154	0.0369032	0.835209	RGL3
rs3816865	11397179	0.0330597	0.835209	RGL3
rs73922652	11395258	0.0277801	0.835209	RGL3
rs58198150	11395711	0.0119334	0.835209	RGL3
rs366720	11396894	0.0115669	0.835209	RGL3
rs367071	11396970	0.0115669	0.835209	RGL3
rs379130	11397020	0.0115669	0.835209	RGL3
rs394497	11396986	0.0115669	0.835209	RGL3
rs394511	11397000	0.0115669	0.835209	RGL3
rs10419064	11401642	0.0105723	0.835209	RGL3
rs366336	11397077	0.0086925	0.835209	RGL3
rs13386802	112425888	0.242455	0.98237	RGPD8
rs13386945	112426079	0.242455	0.98237	RGPD8
rs34510112	112431341	0.242455	0.98237	RGPD8
rs71414642	112429728	0.242455	0.98237	RGPD8
rs1012352	39457145	0.0999892	0.988142	RPL9
rs2125313	39456431	0.0999892	0.988142	RPL9
rs2249563	39453758	0.0999892	0.988142	RPL9
rs2608828	39452110	0.0999892	0.988142	RPL9
rs2687955	39455533	0.0999892	0.988142	RPL9
rs2687956	39455810	0.0999892	0.988142	RPL9
rs2687958	39458104	0.0999892	0.988142	RPL9
rs2687967	39448204	0.0999892	0.988142	RPL9
rs3216720	39456250	0.0999892	0.988142	RPL9
rs6531717	39452701	0.0999892	0.988142	RPL9
rs2972574	8329208	0.519421	0.996675	RPS28
rs1057232	8322323	0.158487	0.996675	RPS28
rs2972572	8325429	0.158487	0.996675	RPS28
rs732217	8324223	0.158487	0.996675	RPS28
rs2290588	26471017	0.17769	0.936474	RPS6KA1
rs9328728	26457276	0.17769	0.936474	RPS6KA1
rs4659375	26477599	0.129751	0.936474	RPS6KA1
rs3811461	26432658	0.109372	0.936474	RPS6KA1
rs9438547	26430996	0.0744835	0.936474	RPS6KA1
rs3816539	26460136	0.0362023	0.936474	RPS6KA1
rs10709725	26468227	0.0272392	0.936474	RPS6KA1
rs10458599	26521463	0.0227377	0.936474	RPS6KA1
rs12046497	26521149	0.0227377	0.936474	RPS6KA1
rs4970466	26522821	0.0227377	0.936474	RPS6KA1
rs61692526	26523415	0.0227377	0.936474	RPS6KA1
rs12094989	26521895	0.0159274	0.936474	RPS6KA1
rs7539320	26524174	0.0159274	0.936474	RPS6KA1
rs139827909	26449784	0.00628282	0.936474	RPS6KA1
rs2045344	26492393	0.00628282	0.936474	RPS6KA1
rs2045345	26492403	0.00628282	0.936474	RPS6KA1
rs4659443	26497140	0.00628282	0.936474	RPS6KA1
rs4659444	26498625	0.00628282	0.936474	RPS6KA1
rs61789103	26492392	0.00628282	0.936474	RPS6KA1
rs61789104	26492394	0.00628282	0.936474	RPS6KA1
rs6690458	26463296	0.00628282	0.936474	RPS6KA1
rs67849345	26499158	0.00628282	0.936474	RPS6KA1
rs7522551	26445967	0.00628282	0.936474	RPS6KA1
rs12086684	26510576	0.00627699	0.936474	RPS6KA1
rs4970514	26519704	0.00627699	0.936474	RPS6KA1
rs55840663	26514335	0.00627699	0.936474	RPS6KA1
rs12093376	26523482	0.00581571	0.936474	RPS6KA1
rs6669111	26501691	0.00458777	0.936474	RPS6KA1
rs6693662	26494739	0.00458777	0.936474	RPS6KA1
rs11075256	15094055	1	0.969516	RRN3
rs113413540	82289236	0.046204	0.856475	SAXO2
rs116286063	82276937	0.046204	0.856475	SAXO2
rs12437458	82278860	0.046204	0.856475	SAXO2
rs149892112	82262805	0.046204	0.856475	SAXO2
rs150165216	82281009	0.046204	0.856475	SAXO2
rs35316572	82371690	0.046204	0.856475	SAXO2
rs58303451	82273728	0.046204	0.856475	SAXO2
rs745532227	82294750	0.046204	0.856475	SAXO2
rs775204007	82298637	0.046204	0.856475	SAXO2
rs79777326	82271865	0.046204	0.856475	SAXO2
rs35018070	82312723	0.0380717	0.856475	SAXO2
rs768935484	82325213	0.033443	0.856475	SAXO2
rs10152239	82156069	0.0172238	0.856475	SAXO2
rs10152266	82158062	0.0172238	0.856475	SAXO2
rs10152316	82158177	0.0172238	0.856475	SAXO2
rs10152695	82201869	0.0172238	0.856475	SAXO2
rs111421657	82148207	0.0172238	0.856475	SAXO2
rs112659606	82151246	0.0172238	0.856475	SAXO2
rs12442609	82167013	0.0172238	0.856475	SAXO2
rs12442655	82190186	0.0172238	0.856475	SAXO2
rs12442682	82190248	0.0172238	0.856475	SAXO2
rs12442862	82177552	0.0172238	0.856475	SAXO2
rs13380011	82164714	0.0172238	0.856475	SAXO2
rs143219850	82154542	0.0172238	0.856475	SAXO2
rs57598148	82167244	0.0172238	0.856475	SAXO2
rs74381346	82159637	0.0172238	0.856475	SAXO2
rs77341284	82158678	0.0172238	0.856475	SAXO2
rs77617238	82184320	0.0172238	0.856475	SAXO2
rs78664413	82151483	0.0172238	0.856475	SAXO2
rs9972386	82161942	0.0172238	0.856475	SAXO2
rs150180019	82202834	0.0120113	0.856475	SAXO2
rs12323987	82186086	0.00729625	0.856475	SAXO2
rs12439569	82198356	0.00729625	0.856475	SAXO2
rs61413136	82170788	0.00729625	0.856475	SAXO2
rs1197449313	82317590	0.00581152	0.856475	SAXO2
rs567448894	82392146	0.00581152	0.856475	SAXO2
rs567736057	82376096	0.00581152	0.856475	SAXO2
rs865959887	82376670	0.00581152	0.856475	SAXO2
rs964880514	82370273	0.00581152	0.856475	SAXO2
rs989791154	82375445	0.00581152	0.856475	SAXO2
rs114254349	82252157	0.00542207	0.856475	SAXO2
rs140370590	82251191	0.00542207	0.856475	SAXO2
rs185801521	82250203	0.00542207	0.856475	SAXO2
rs561547274	82338747	0.00509814	0.856475	SAXO2
rs145196057	82240927	0.00403787	0.856475	SAXO2
rs778808130	82313958	0.00379353	0.856475	SAXO2
rs767339438	82437810	0.00347452	0.856475	SAXO2
rs11633000	82269320	0.00340325	0.856475	SAXO2
rs11639440	82278705	0.00340325	0.856475	SAXO2
rs7168638	74988485	0.436996	0.833891	SCAMP5
rs111726606	75006419	0.0602945	0.833891	SCAMP5
rs12592477	75000358	0.0602945	0.833891	SCAMP5
rs12594117	75031307	0.0602945	0.833891	SCAMP5
rs3833823	75015180	0.0602945	0.833891	SCAMP5
rs3910748	75026311	0.0602945	0.833891	SCAMP5
rs6495136	75003123	0.0602945	0.833891	SCAMP5
[truncated: 661 more rows]

## Sheet: Supplemental Table 4
Supplemental Table 4
Colocalization Analysis with Broadaway et al. eQTLs: 95% credible set
snp	position	SNP.PP.H4	prob	gene_tested
rs11626972	73566890	0.772359	0.876858	ACOT2
rs58231493	73565418	0.227641	0.876858	ACOT2
rs4782327	89117727	0.993183	0.944184	ACSF3
rs11657440	81513660	0.761697	0.997757	ACTG1
rs10153315	81514746	0.21574	0.997757	ACTG1
rs2278859	43340762	0.134525	0.93851	ADAL
rs7168940	43341136	0.134525	0.93851	ADAL
rs1549523	43331991	0.122968	0.93851	ADAL
rs1549525	43335657	0.122968	0.93851	ADAL
rs3742971	43330718	0.122968	0.93851	ADAL
rs7175434	43336344	0.122968	0.93851	ADAL
rs1123947	43333235	0.0651979	0.93851	ADAL
rs12101673	43337233	0.0651979	0.93851	ADAL
rs11858152	43341998	0.0342883	0.93851	ADAL
rs3742969	43329749	0.0224795	0.93851	ADAL
rs484029	43327362	0.00667695	0.93851	ADAL
rs4759529	130970207	0.264209	0.872737	ADGRD1
rs4759530	130970260	0.264209	0.872737	ADGRD1
rs4759531	130970495	0.172064	0.872737	ADGRD1
rs4759813	130970494	0.172064	0.872737	ADGRD1
rs4759814	130970676	0.106517	0.872737	ADGRD1
rs2207000	135302695	1	0.999347	AHI1
rs11188444	95718089	0.176589	0.927443	ALDH18A1
rs112901313	95706372	0.0965353	0.927443	ALDH18A1
rs4918955	95661517	0.0942488	0.927443	ALDH18A1
rs10882650	95672939	0.0577021	0.927443	ALDH18A1
rs113729469	95668644	0.0577021	0.927443	ALDH18A1
rs55801606	95703714	0.0577021	0.927443	ALDH18A1
rs61871796	95665573	0.0577021	0.927443	ALDH18A1
rs6946	95663951	0.0577021	0.927443	ALDH18A1
rs7072953	95680815	0.0577021	0.927443	ALDH18A1
rs7073010	95681055	0.0577021	0.927443	ALDH18A1
rs12357173	95684846	0.0177771	0.927443	ALDH18A1
rs11188501	95841162	0.0108101	0.927443	ALDH18A1
rs11188504	95846467	0.0108101	0.927443	ALDH18A1
rs11188506	95852244	0.0108101	0.927443	ALDH18A1
rs3176884	95844894	0.0108101	0.927443	ALDH18A1
rs4402217	95853846	0.0108101	0.927443	ALDH18A1
rs7089668	95848665	0.0108101	0.927443	ALDH18A1
rs10882649	95666329	0.00937186	0.927443	ALDH18A1
rs11188455	95731166	0.0050661	0.927443	ALDH18A1
rs11188464	95739096	0.0050661	0.927443	ALDH18A1
rs11593044	95752208	0.0050661	0.927443	ALDH18A1
rs11593761	95777855	0.0050661	0.927443	ALDH18A1
rs11597321	95752192	0.0050661	0.927443	ALDH18A1
rs12358481	95746346	0.0050661	0.927443	ALDH18A1
rs12359366	95731958	0.0050661	0.927443	ALDH18A1
rs17462179	95746948	0.0050661	0.927443	ALDH18A1
rs17553401	95747716	0.0050661	0.927443	ALDH18A1
rs3176895	95754431	0.0050661	0.927443	ALDH18A1
rs4320886	95764839	0.0050661	0.927443	ALDH18A1
rs4463786	95775140	0.0050661	0.927443	ALDH18A1
rs4568937	95742840	0.0050661	0.927443	ALDH18A1
rs4918966	95753605	0.0050661	0.927443	ALDH18A1
rs61869573	95731913	0.0050661	0.927443	ALDH18A1
rs7918339	95745170	0.0050661	0.927443	ALDH18A1
rs10509686	95817989	0.0046421	0.927443	ALDH18A1
rs78280154	95812160	0.0046421	0.927443	ALDH18A1
rs11101966	109512676	0.328648	0.917445	AMIGO1
rs6684193	109512587	0.328648	0.917445	AMIGO1
rs6684194	109512589	0.328648	0.917445	AMIGO1
rs10956146	123737464	0.967278	0.996665	ANXA13
rs2294366	39083348	0.228612	0.956165	APOBEC3G
rs2011869	39084692	0.198514	0.956165	APOBEC3G
rs5757472	39087962	0.0858775	0.956165	APOBEC3G
rs2413571	39085388	0.084443	0.956165	APOBEC3G
rs2413572	39085890	0.084443	0.956165	APOBEC3G
rs2899313	39086018	0.084443	0.956165	APOBEC3G
rs5757467	39084254	0.084443	0.956165	APOBEC3G
rs5757470	39085855	0.084443	0.956165	APOBEC3G
rs5757468	39084255	0.0553684	0.956165	APOBEC3G
rs221035	16200034	0.686567	0.996317	ARHGEF19
rs221045	16203554	0.156672	0.996317	ARHGEF19
rs221052	16206527	0.156672	0.996317	ARHGEF19
rs10187005	231213235	0.56263	0.954602	ARMC9
rs78839329	231200746	0.156037	0.954602	ARMC9
rs2005013	231202161	0.0849205	0.954602	ARMC9
rs13423632	231214403	0.032626	0.954602	ARMC9
rs28678038	231199283	0.0294401	0.954602	ARMC9
rs58383275	231199232	0.0294401	0.954602	ARMC9
rs12478335	231200253	0.0224195	0.954602	ARMC9
rs7571479	231203828	0.0221552	0.954602	ARMC9
rs12478520	231200593	0.020781	0.954602	ARMC9
rs2246920	62337465	0.348589	0.927807	ASRGL1
rs2513749	62337919	0.145711	0.927807	ASRGL1
rs2513071	62330915	0.137663	0.927807	ASRGL1
rs2513074	62333408	0.137663	0.927807	ASRGL1
rs7125402	62329787	0.137663	0.927807	ASRGL1
rs2513075	62334936	0.0163193	0.927807	ASRGL1
rs2513076	62336239	0.0163193	0.927807	ASRGL1
rs2513747	62331263	0.0163193	0.927807	ASRGL1
rs9940094	56472214	0.984371	0.986385	BBS2
rs11191421	102863296	0.5	0.978671	BORCS7
rs9527	102863821	0.5	0.978671	BORCS7
rs6950023	98286323	0.383628	0.89235	BRI3
rs6967728	98286325	0.383628	0.89235	BRI3
rs7015	98291311	0.184364	0.89235	BRI3
rs12173854	26371451	0.0185011	0.897666	BTN3A2
rs12174602	26372599	0.0185011	0.897666	BTN3A2
rs12174623	26372858	0.0185011	0.897666	BTN3A2
rs12174631	26372922	0.0185011	0.897666	BTN3A2
rs12174639	26372893	0.0185011	0.897666	BTN3A2
rs12176317	26372558	0.0185011	0.897666	BTN3A2
rs2073527	26374750	0.0185011	0.897666	BTN3A2
rs2073529	26374931	0.0185011	0.897666	BTN3A2
rs2073530	26375015	0.0185011	0.897666	BTN3A2
rs2073531	26375028	0.0185011	0.897666	BTN3A2
rs28362606	26365358	0.0185011	0.897666	BTN3A2
rs34436535	26370137	0.0185011	0.897666	BTN3A2
rs34550936	26361757	0.0185011	0.897666	BTN3A2
rs34622023	26361891	0.0185011	0.897666	BTN3A2
rs34878490	26370344	0.0185011	0.897666	BTN3A2
rs35304979	26356119	0.0185011	0.897666	BTN3A2
rs35307327	26370246	0.0185011	0.897666	BTN3A2
rs35815698	26372232	0.0185011	0.897666	BTN3A2
rs35934643	26354866	0.0185011	0.897666	BTN3A2
rs66827971	26365538	0.0185011	0.897666	BTN3A2
rs68112369	26365531	0.0185011	0.897666	BTN3A2
rs71557332	26356625	0.0185011	0.897666	BTN3A2
rs71557334	26365685	0.0185011	0.897666	BTN3A2
rs71557335	26368051	0.0185011	0.897666	BTN3A2
rs72836482	26359013	0.0185011	0.897666	BTN3A2
rs9348709	26360083	0.0185011	0.897666	BTN3A2
rs9348712	26366283	0.0185011	0.897666	BTN3A2
rs9357006	26364400	0.0185011	0.897666	BTN3A2
rs9358932	26362477	0.0185011	0.897666	BTN3A2
rs9358934	26363527	0.0185011	0.897666	BTN3A2
rs9358935	26369359	0.0185011	0.897666	BTN3A2
rs9358936	26370429	0.0185011	0.897666	BTN3A2
rs9358937	26374046	0.0185011	0.897666	BTN3A2
rs9379851	26354552	0.0185011	0.897666	BTN3A2
rs9379852	26357050	0.0185011	0.897666	BTN3A2
rs9379853	26357407	0.0185011	0.897666	BTN3A2
rs9379854	26362626	0.0185011	0.897666	BTN3A2
rs9379855	26364702	0.0185011	0.897666	BTN3A2
rs9379856	26366608	0.0185011	0.897666	BTN3A2
rs9379857	26367426	0.0185011	0.897666	BTN3A2
rs9379858	26367461	0.0185011	0.897666	BTN3A2
rs9379859	26369321	0.0185011	0.897666	BTN3A2
rs9379863	26372199	0.0185011	0.897666	BTN3A2
rs9379864	26372356	0.0185011	0.897666	BTN3A2
rs9393703	26356723	0.0185011	0.897666	BTN3A2
rs9393705	26360783	0.0185011	0.897666	BTN3A2
rs9393706	26361272	0.0185011	0.897666	BTN3A2
rs9393707	26362258	0.0185011	0.897666	BTN3A2
rs9393708	26362415	0.0185011	0.897666	BTN3A2
rs9393710	26367605	0.0185011	0.897666	BTN3A2
rs9393711	26370431	0.0185011	0.897666	BTN3A2
rs9393712	26370772	0.0185011	0.897666	BTN3A2
rs1699387	129110343	0.493997	0.978136	C4orf33
rs337277	129109497	0.493997	0.978136	C4orf33
rs28370020	223716904	0.245011	0.981439	CAPN2
rs11579787	223719275	0.243792	0.981439	CAPN2
rs11580689	223718938	0.243792	0.981439	CAPN2
rs12080565	223718131	0.208467	0.981439	CAPN2
rs28370029	223719836	0.0282218	0.981439	CAPN2
rs35902645	75511912	0.998739	0.981252	CASKIN2
rs6442463	14652153	0.331882	0.983006	CCDC174
rs11928962	14649604	0.228841	0.983006	CCDC174
rs6791383	14648921	0.228841	0.983006	CCDC174
rs56174608	14645422	0.08498	0.983006	CCDC174
rs6442464	14652570	0.0518516	0.983006	CCDC174
rs9310457	14646564	0.0353083	0.983006	CCDC174
rs2070610	29073627	0.656331	0.868475	CCT8
rs73192133	29067909	0.111359	0.868475	CCT8
rs965951	29060236	0.0793267	0.868475	CCT8
rs2070611	29073453	0.0555941	0.868475	CCT8
rs2409330	29035981	0.0195946	0.868475	CCT8
rs60260312	29032075	0.0195946	0.868475	CCT8
rs112167519	29013387	0.0118703	0.868475	CCT8
rs10870597	114234161	0.0965229	0.889559	CDC16
rs61973461	114234990	0.0965229	0.889559	CDC16
rs7331882	114235244	0.0965229	0.889559	CDC16
rs7336692	114234842	0.0965229	0.889559	CDC16
rs9590404	114233584	0.0965229	0.889559	CDC16
rs9590405	114234363	0.0965229	0.889559	CDC16
rs7321688	114234890	0.0486821	0.889559	CDC16
rs9590403	114233320	0.0486821	0.889559	CDC16
rs7987485	114241457	0.0479437	0.889559	CDC16
rs9590494	114241023	0.0479437	0.889559	CDC16
rs9590492	114237284	0.0350858	0.889559	CDC16
rs6560947	114237993	0.0347156	0.889559	CDC16
rs7982373	114241614	0.0347156	0.889559	CDC16
rs7987334	114241376	0.0347156	0.889559	CDC16
rs7994573	114242913	0.0255405	0.889559	CDC16
rs8002514	114236830	0.0190935	0.889559	CDC16
rs4299857	110113970	0.0408421	0.944044	CDC40
rs6927722	110109408	0.0408421	0.944044	CDC40
rs6928684	110109755	0.0408421	0.944044	CDC40
rs73535810	110115665	0.0408421	0.944044	CDC40
rs11153223	110119612	0.039208	0.944044	CDC40
rs12660791	110135459	0.039208	0.944044	CDC40
rs12665849	110124681	0.039208	0.944044	CDC40
rs12665858	110124803	0.039208	0.944044	CDC40
rs73535817	110129597	0.039208	0.944044	CDC40
rs73535821	110133071	0.039208	0.944044	CDC40
rs76522487	110123330	0.039208	0.944044	CDC40
rs111952529	110199586	0.0360116	0.944044	CDC40
rs11751590	110164740	0.0360116	0.944044	CDC40
rs11757055	110183477	0.0360116	0.944044	CDC40
rs145972659	110196842	0.0360116	0.944044	CDC40
rs1462492	110149255	0.0360116	0.944044	CDC40
rs4339500	110190611	0.0360116	0.944044	CDC40
rs4947048	110149992	0.0360116	0.944044	CDC40
rs4947051	110162884	0.0360116	0.944044	CDC40
rs6926540	110173006	0.0360116	0.944044	CDC40
rs6927667	110146744	0.0360116	0.944044	CDC40
rs73535837	110154239	0.0360116	0.944044	CDC40
rs7744828	110182328	0.0360116	0.944044	CDC40
rs57983455	110202247	0.0174278	0.944044	CDC40
rs6918148	110211602	0.0174278	0.944044	CDC40
rs73537949	110212770	0.0174278	0.944044	CDC40
rs6938139	110218755	0.00677068	0.944044	CDC40
rs12660119	110084467	0.00501748	0.944044	CDC40
rs61020234	110089121	0.00416444	0.944044	CDC40
rs2002630	110088581	0.00403024	0.944044	CDC40
rs60495849	110112381	0.00403024	0.944044	CDC40
rs78660281	110088011	0.00403024	0.944044	CDC40
rs629301	109275684	0.499995	0.989789	CELSR2
rs646776	109275908	0.499995	0.989789	CELSR2
rs1471539	49492439	0.249896	0.946399	CENPQ
rs2501965	49488832	0.249896	0.946399	CENPQ
rs2501966	49490122	0.249896	0.946399	CENPQ
rs2501968	49492265	0.249896	0.946399	CENPQ
rs5752776	28712241	0.92336	0.996759	CHEK2
rs5752773	28709427	0.0737012	0.996759	CHEK2
rs10137070	64930009	0.0862713	0.945306	CHURC1
rs10146885	64935101	0.0862713	0.945306	CHURC1
rs10147758	64929925	0.0862713	0.945306	CHURC1
rs11158569	64933351	0.0862713	0.945306	CHURC1
rs11331213	64928725	0.0862713	0.945306	CHURC1
rs4902338	64927350	0.0862713	0.945306	CHURC1
rs4902340	64928663	0.0862713	0.945306	CHURC1
rs4902341	64928907	0.0862713	0.945306	CHURC1
rs4902343	64929462	0.0862713	0.945306	CHURC1
rs67330703	64928346	0.0862713	0.945306	CHURC1
rs6745	64934977	0.0862713	0.945306	CHURC1
rs12172810	64938664	0.035078	0.945306	CHURC1
rs11547207	78131254	1	0.999992	CIB2
rs10753465	224383280	0.0646481	0.864756	CNIH4
rs10753466	224396224	0.0646481	0.864756	CNIH4
rs10799569	224371110	0.0646481	0.864756	CNIH4
rs10916607	224383676	0.0646481	0.864756	CNIH4
rs147435830	224383819	0.0646481	0.864756	CNIH4
rs1539207	224382219	0.0646481	0.864756	CNIH4
rs4653587	224440806	0.0646481	0.864756	CNIH4
rs4654037	224379302	0.0646481	0.864756	CNIH4
rs6426121	224402880	0.0646481	0.864756	CNIH4
rs6426123	224436689	0.0646481	0.864756	CNIH4
rs6672859	224384768	0.0646481	0.864756	CNIH4
rs7529067	224365169	0.0646481	0.864756	CNIH4
rs7529310	224442342	0.0646481	0.864756	CNIH4
rs7517754	224356827	0.022603	0.864756	CNIH4
rs11803981	224357708	0.0126281	0.864756	CNIH4
rs10127813	224390453	0.00719906	0.864756	CNIH4
rs12745610	224385899	0.00719906	0.864756	CNIH4
rs35031726	224374708	0.00719906	0.864756	CNIH4
rs35169600	224400671	0.00719906	0.864756	CNIH4
rs36138926	224382474	0.00719906	0.864756	CNIH4
rs6693287	224377476	0.00719906	0.864756	CNIH4
rs7518109	224401123	0.00719906	0.864756	CNIH4
rs885606	224444168	0.00719906	0.864756	CNIH4
rs12751161	224418011	0.00485432	0.864756	CNIH4
rs11807942	224372669	0.00424517	0.864756	CNIH4
rs11579952	224359490	0.00349309	0.864756	CNIH4
rs6671751	224358082	0.00349309	0.864756	CNIH4
rs67065875	224359817	0.00349309	0.864756	CNIH4
rs6019545	48940477	0.0460846	0.91019	CSE1L
rs6090940	49049490	0.0255031	0.91019	CSE1L
rs6019604	49036961	0.0249266	0.91019	CSE1L
rs2295033	48994359	0.0232504	0.91019	CSE1L
rs1048590	48993760	0.0206886	0.91019	CSE1L
rs11905116	49041527	0.0206886	0.91019	CSE1L
rs13041022	49025939	0.0206886	0.91019	CSE1L
rs1569749	48984972	0.0206886	0.91019	CSE1L
rs1983639	48955745	0.0206886	0.91019	CSE1L
rs1997854	48985802	0.0206886	0.91019	CSE1L
rs34537217	49007949	0.0206886	0.91019	CSE1L
rs6012586	49030880	0.0206886	0.91019	CSE1L
rs6019557	48966835	0.0206886	0.91019	CSE1L
rs6019558	48966943	0.0206886	0.91019	CSE1L
rs6019591	49023492	0.0206886	0.91019	CSE1L
rs6019593	49023631	0.0206886	0.91019	CSE1L
rs6019594	49027017	0.0206886	0.91019	CSE1L
rs6019595	49027495	0.0206886	0.91019	CSE1L
rs6019601	49031125	0.0206886	0.91019	CSE1L
rs6019602	49034955	0.0206886	0.91019	CSE1L
rs6019603	49036869	0.0206886	0.91019	CSE1L
rs6019609	49039231	0.0206886	0.91019	CSE1L
rs6090932	48981761	0.0206886	0.91019	CSE1L
rs6095400	49029452	0.0206886	0.91019	CSE1L
rs6095401	49030084	0.0206886	0.91019	CSE1L
rs6095407	49044933	0.0206886	0.91019	CSE1L
rs66970580	49024802	0.0206886	0.91019	CSE1L
rs68087998	49027755	0.0206886	0.91019	CSE1L
rs707533	49035717	0.0206886	0.91019	CSE1L
rs707534	49035801	0.0206886	0.91019	CSE1L
rs7270848	49023200	0.0206886	0.91019	CSE1L
rs73623293	49028465	0.0206886	0.91019	CSE1L
rs927160	49038027	0.0206886	0.91019	CSE1L
rs13042947	49031339	0.0192439	0.91019	CSE1L
rs2295027	48966347	0.0191113	0.91019	CSE1L
rs6019535	48924980	0.0186072	0.91019	CSE1L
rs34984028	48932510	0.0160348	0.91019	CSE1L
rs6095367	48933951	0.0160348	0.91019	CSE1L
rs6019600	49030395	0.00715957	0.91019	CSE1L
rs2075675	49068956	0.00677942	0.91019	CSE1L
rs2869694	49051846	0.00677942	0.91019	CSE1L
rs35018308	49051385	0.00677942	0.91019	CSE1L
rs3817652	49046831	0.00677942	0.91019	CSE1L
rs6012590	49050700	0.00677942	0.91019	CSE1L
rs6012591	49050805	0.00677942	0.91019	CSE1L
rs6012592	49060625	0.00677942	0.91019	CSE1L
rs6019613	49048130	0.00677942	0.91019	CSE1L
rs6019618	49055001	0.00677942	0.91019	CSE1L
rs6019620	49062763	0.00677942	0.91019	CSE1L
rs6019621	49063426	0.00677942	0.91019	CSE1L
rs6090939	49049288	0.00677942	0.91019	CSE1L
rs6090941	49060414	0.00677942	0.91019	CSE1L
rs6095417	49061664	0.00677942	0.91019	CSE1L
rs66501340	49060648	0.00677942	0.91019	CSE1L
rs7509369	49051500	0.00677942	0.91019	CSE1L
rs6019547	48944554	0.00469671	0.91019	CSE1L
rs3795082	49056465	0.00456543	0.91019	CSE1L
rs2075676	49074674	0.00449367	0.91019	CSE1L
rs2426117	49076623	0.00449367	0.91019	CSE1L
rs2426120	49080716	0.00449367	0.91019	CSE1L
rs2426121	49081195	0.00449367	0.91019	CSE1L
rs11407519	23661513	0.246629	0.951717	DCTN5
rs249870	23654857	0.246629	0.951717	DCTN5
rs7588	23669844	0.246629	0.951717	DCTN5
rs249867	23657247	0.0986497	0.951717	DCTN5
rs34514	23659276	0.0591065	0.951717	DCTN5
rs26767	23687136	0.0422712	0.951717	DCTN5
rs35586	23665685	0.0409997	0.951717	DCTN5
rs233127	85328118	0.0967327	0.956222	DDAH1
rs233113	85320616	0.0687483	0.956222	DDAH1
rs233114	85321274	0.0687483	0.956222	DDAH1
rs233115	85321294	0.0687483	0.956222	DDAH1
rs233119	85322369	0.0687483	0.956222	DDAH1
rs233121	85324230	0.0687483	0.956222	DDAH1
rs3216612	85327421	0.0687483	0.956222	DDAH1
rs233067	85339295	0.0502856	0.956222	DDAH1
rs233057	85333172	0.0335759	0.956222	DDAH1
rs233058	85333182	0.0335759	0.956222	DDAH1
rs233059	85333253	0.0335759	0.956222	DDAH1
rs233060	85333260	0.0335759	0.956222	DDAH1
rs233062	85334702	0.0335759	0.956222	DDAH1
rs233130	85329429	0.0335759	0.956222	DDAH1
rs233131	85329576	0.0335759	0.956222	DDAH1
rs233132	85330862	0.0335759	0.956222	DDAH1
rs35822306	85334770	0.0335759	0.956222	DDAH1
rs35901619	85333030	0.0335759	0.956222	DDAH1
rs423105	85330744	0.0335759	0.956222	DDAH1
rs173026	85338566	0.030686	0.956222	DDAH1
rs4931424	31076383	0.307157	0.934684	DDX11
rs11051227	31062096	0.225462	0.934684	DDX11
rs11051231	31068138	0.225462	0.934684	DDX11
rs61008038	31065104	0.225462	0.934684	DDX11
rs57037358	132141098	0.824865	0.963104	DDX51
rs9788169	132140560	0.0625457	0.963104	DDX51
rs12322796	132090744	0.0219765	0.963104	DDX51
rs7134173	132101614	0.0219765	0.963104	DDX51
rs11246932	132125768	0.0153379	0.963104	DDX51
rs6598202	132133262	0.0107203	0.963104	DDX51
rs12082129	200681362	0.952138	0.89545	DDX59
rs58895660	22067738	1	0.870057	DMTN
rs17553284	43023570	1	0.994983	DNAJC15
rs2246810	36203237	1	0.994141	DOP1B
rs10955938	119857811	0.142856	0.993023	DSCC1
rs113408398	119855898	0.142856	0.993023	DSCC1
rs11785110	119857948	0.142856	0.993023	DSCC1
rs28619135	119858365	0.142856	0.993023	DSCC1
rs28700049	119858354	0.142856	0.993023	DSCC1
rs55741337	119858877	0.142856	0.993023	DSCC1
rs7815122	119856782	0.142856	0.993023	DSCC1
rs34597012	30667817	1	0.999943	DUSP18
rs61279344	171703416	0.243917	0.933148	DYNC1I2
rs13429113	171696255	0.180773	0.933148	DYNC1I2
rs34617871	171695833	0.180773	0.933148	DYNC1I2
rs2138348	171701662	0.146722	0.933148	DYNC1I2
rs13397444	171759913	0.0259081	0.933148	DYNC1I2
rs11886820	171757697	0.0257578	0.933148	DYNC1I2
rs4667694	171748889	0.0257578	0.933148	DYNC1I2
rs35379278	171774219	0.0215766	0.933148	DYNC1I2
rs6722757	171735453	0.0198488	0.933148	DYNC1I2
rs2292815	171730141	0.0192794	0.933148	DYNC1I2
rs1973706	171802771	0.0153307	0.933148	DYNC1I2
rs7355523	171887911	0.0117476	0.933148	DYNC1I2
rs4668414	171847781	0.00972445	0.933148	DYNC1I2
rs13030911	171918131	0.00846031	0.933148	DYNC1I2
rs12692974	171806746	0.00603405	0.933148	DYNC1I2
rs6754817	171806884	0.00498333	0.933148	DYNC1I2
rs35854280	171718676	0.00343833	0.933148	DYNC1I2
rs1769590	33909393	0.857515	0.987549	EGLN3
rs1769591	33909680	0.102864	0.987549	EGLN3
rs2236352	24141524	0.999952	0.98633	EMC9
rs71385997	79085118	0.288248	0.835633	ENGASE
rs34879184	79082873	0.234061	0.835633	ENGASE
rs61756761	79083494	0.234061	0.835633	ENGASE
rs73398101	79081370	0.229217	0.835633	ENGASE
rs9953424	674645	0.999984	0.966363	ENOSF1
rs1042032	27544557	0.491276	0.984595	EPHX2
rs1126452	27544447	0.491276	0.984595	EPHX2
rs2910686	96916885	0.5	0.999001	ERAP2
rs2927608	96916728	0.5	0.999001	ERAP2
rs1841311	27774113	0.853297	0.958896	ESCO2
rs10093956	27771369	0.0855652	0.958896	ESCO2
rs7842666	27772635	0.0432094	0.958896	ESCO2
rs4985407	70251998	0.984223	0.994613	EXOSC6
rs1801020	177409531	0.999171	0.96555	F12
rs10853112	49836149	0.199731	0.841	FAM117A
rs7502494	49801552	0.194309	0.841	FAM117A
rs755736	49814542	0.194309	0.841	FAM117A
rs12449890	49820785	0.137169	0.841	FAM117A
rs11656541	49754487	0.114326	0.841	FAM117A
rs5820777	49764477	0.114326	0.841	FAM117A
rs2357020	118986644	0.0980622	0.964932	FAM184A
rs61571693	118989227	0.0980622	0.964932	FAM184A
rs794263	119001303	0.0899041	0.964932	FAM184A
rs794264	119001257	0.0899041	0.964932	FAM184A
rs2051056	118978418	0.0870751	0.964932	FAM184A
rs2051057	118978278	0.0870751	0.964932	FAM184A
rs4946383	118983460	0.0859418	0.964932	FAM184A
rs71738372	118990590	0.0859418	0.964932	FAM184A
rs11967889	118992468	0.0407736	0.964932	FAM184A
rs2797352	118996678	0.0407736	0.964932	FAM184A
rs57100274	118993610	0.0407736	0.964932	FAM184A
rs57285368	118993517	0.0407736	0.964932	FAM184A
rs794266	118999148	0.0407736	0.964932	FAM184A
rs9401113	118993959	0.0407736	0.964932	FAM184A
rs3134867	1684252	0.999256	0.994267	FAM53A
rs10912810	171343077	0.142195	0.982614	FMO1
rs12121479	171342216	0.142195	0.982614	FMO1
rs2235508	171344796	0.142195	0.982614	FMO1
rs2235509	171344852	0.142195	0.982614	FMO1
rs2235510	171345003	0.142195	0.982614	FMO1
rs36112567	171342892	0.142195	0.982614	FMO1
rs7518648	171344602	0.142195	0.982614	FMO1
rs10912810	171343077	0.138517	0.988507	FMO4
rs12121479	171342216	0.138517	0.988507	FMO4
rs2235508	171344796	0.138517	0.988507	FMO4
rs2235509	171344852	0.138517	0.988507	FMO4
rs2235510	171345003	0.138517	0.988507	FMO4
rs36112567	171342892	0.138517	0.988507	FMO4
rs7518648	171344602	0.138517	0.988507	FMO4
rs4971252	203351280	0.977481	0.97455	FMOD
rs3830531	82720752	0.499012	0.998656	FN3KRP
rs58867683	82721579	0.499012	0.998656	FN3KRP
rs395810	22684866	0.143436	0.908849	GAS2
rs11327326	22684512	0.0612946	0.908849	GAS2
rs373751	22684104	0.0612946	0.908849	GAS2
rs378431	22685502	0.0612946	0.908849	GAS2
rs395398	22685921	0.0612946	0.908849	GAS2
rs448264	22685554	0.0612946	0.908849	GAS2
rs598393	22684506	0.0612946	0.908849	GAS2
rs601069	22685090	0.0612946	0.908849	GAS2
rs612567	22685357	0.0612946	0.908849	GAS2
rs671057	22684533	0.0612946	0.908849	GAS2
rs380231	22686013	0.0362462	0.908849	GAS2
rs151113234	22682295	0.0103555	0.908849	GAS2
rs1695520	22682958	0.0103555	0.908849	GAS2
rs2928338	22682550	0.0103555	0.908849	GAS2
rs2928339	22682427	0.0103555	0.908849	GAS2
rs2928343	22683302	0.0103555	0.908849	GAS2
rs2928345	22680792	0.0103555	0.908849	GAS2
rs2956868	22683250	0.0103555	0.908849	GAS2
rs34144110	22678589	0.0103555	0.908849	GAS2
rs372669	22683794	0.0103555	0.908849	GAS2
rs385907	22680015	0.0103555	0.908849	GAS2
rs400650	22683420	0.0103555	0.908849	GAS2
rs400782	22680214	0.0103555	0.908849	GAS2
rs400862	22683411	0.0103555	0.908849	GAS2
rs400869	22683401	0.0103555	0.908849	GAS2
rs408197	22681733	0.0103555	0.908849	GAS2
rs430864	22680144	0.0103555	0.908849	GAS2
rs431127	22678845	0.0103555	0.908849	GAS2
rs434643	22680411	0.0103555	0.908849	GAS2
rs437734	22678668	0.0103555	0.908849	GAS2
rs439404	22679982	0.0103555	0.908849	GAS2
rs439540	22679910	0.0103555	0.908849	GAS2
rs443661	22679279	0.0103555	0.908849	GAS2
rs10493821	89009452	0.348342	0.939003	GBP3
rs12146148	89006209	0.348342	0.939003	GBP3
rs2390677	89010159	0.159659	0.939003	GBP3
rs17433780	89009135	0.143657	0.939003	GBP3
rs540742	78119402	0.124028	0.814164	GIPC2
rs587433	78121562	0.124028	0.814164	GIPC2
rs616332	78121172	0.124028	0.814164	GIPC2
rs617195	78121000	0.124028	0.814164	GIPC2
rs621524	78121637	0.124028	0.814164	GIPC2
rs523751	78139995	0.0474782	0.814164	GIPC2
rs561300	78116398	0.0256953	0.814164	GIPC2
rs585072	78115586	0.0256953	0.814164	GIPC2
rs586333	78115319	0.0256953	0.814164	GIPC2
rs595384	78115409	0.0256953	0.814164	GIPC2
rs599417	78114719	0.0256953	0.814164	GIPC2
rs685393	78113677	0.0256953	0.814164	GIPC2
rs685848	78113798	0.0256953	0.814164	GIPC2
rs582395	78140900	0.0171204	0.814164	GIPC2
rs600781	78140664	0.0171204	0.814164	GIPC2
rs139844601	78126056	0.0121531	0.814164	GIPC2
rs507045	78118041	0.00628112	0.814164	GIPC2
rs534283	78118686	0.00628112	0.814164	GIPC2
rs566236	78125409	0.00628112	0.814164	GIPC2
rs650495	78125074	0.00628112	0.814164	GIPC2
rs651897	78118793	0.00628112	0.814164	GIPC2
rs614963	78137383	0.00497146	0.814164	GIPC2
rs627661	78136807	0.00497146	0.814164	GIPC2
rs663254	78137257	0.00497146	0.814164	GIPC2
rs1510245	78112944	0.00267375	0.814164	GIPC2
rs605659	78132160	0.00212009	0.814164	GIPC2
rs10677116	78139556	0.00201175	0.814164	GIPC2
rs494496	78140894	0.00201175	0.814164	GIPC2
rs521029	78140285	0.00201175	0.814164	GIPC2
rs34398272	156322507	0.421815	0.989835	GLMP
rs6672860	156324106	0.421815	0.989835	GLMP
rs12079226	156300270	0.0213365	0.989835	GLMP
rs2104404	156287122	0.0213365	0.989835	GLMP
rs3795728	156291700	0.0213365	0.989835	GLMP
rs4661038	156288712	0.0213365	0.989835	GLMP
rs6696400	156306425	0.0213365	0.989835	GLMP
rs73550818	58730951	1	0.999938	GOT2
rs12089784	52602758	0.876138	0.890195	GPX7
rs835339	52596569	0.0309969	0.890195	GPX7
rs3753754	52604721	0.0290103	0.890195	GPX7
rs835342	52598362	0.0243228	0.890195	GPX7
rs3021146	2956459	0.221739	0.866426	GRK4
rs2471336	2995884	0.215108	0.866426	GRK4
rs2471338	2992380	0.215108	0.866426	GRK4
rs3021136	2980732	0.170864	0.866426	GRK4
rs2471351	2983176	0.145082	0.866426	GRK4
rs9549753	113363723	0.87837	0.983192	GRTP1
rs4907622	113362571	0.115243	0.983192	GRTP1
rs2286156	77397143	0.999083	0.934971	GSAP
rs12435016	96298664	0.300472	0.967058	GSKIP
rs7158298	96294226	0.300472	0.967058	GSKIP
rs972726	96302896	0.300472	0.967058	GSKIP
rs11160333	96355059	0.0262747	0.967058	GSKIP
rs35941406	96363513	0.0220942	0.967058	GSKIP
rs11624919	96346836	0.0212459	0.967058	GSKIP
rs624042	52918677	0.121807	0.969669	GSTA4
rs636357	52919154	0.121807	0.969669	GSTA4
rs623692	52918625	0.10686	0.969669	GSTA4
rs635458	52918965	0.10686	0.969669	GSTA4
rs12202200	52914409	0.0598956	0.969669	GSTA4
rs477044	52918031	0.0598956	0.969669	GSTA4
rs481437	52918455	0.0598956	0.969669	GSTA4
rs562606	52917572	0.0598956	0.969669	GSTA4
rs608855	52917639	0.0598956	0.969669	GSTA4
rs9382157	52914207	0.0598956	0.969669	GSTA4
rs523605	52912809	0.0562439	0.969669	GSTA4
rs502304	52915592	0.0210776	0.969669	GSTA4
rs503101	52915650	0.0210776	0.969669	GSTA4
rs593482	52916480	0.0210776	0.969669	GSTA4
rs593515	52916503	0.0210776	0.969669	GSTA4
rs276204	104275555	0.881234	0.996109	GSTO2
rs156697	104279427	0.0533478	0.996109	GSTO2
rs568526	104273681	0.0533478	0.996109	GSTO2
rs2180174	42200232	0.0376098	0.942551	GUCA1B
rs2395804	42196012	0.0376098	0.942551	GUCA1B
rs2395807	42196186	0.0376098	0.942551	GUCA1B
rs4714577	42197962	0.0376098	0.942551	GUCA1B
rs4714578	42198312	0.0376098	0.942551	GUCA1B
rs55828715	42196822	0.0376098	0.942551	GUCA1B
rs6907587	42198814	0.0376098	0.942551	GUCA1B
rs6912658	42199423	0.0376098	0.942551	GUCA1B
rs9381154	42197136	0.0376098	0.942551	GUCA1B
rs10948027	42212262	0.0213065	0.942551	GUCA1B
rs12215589	42212328	0.0213065	0.942551	GUCA1B
rs12660313	42213518	0.0213065	0.942551	GUCA1B
rs1884318	42214222	0.0213065	0.942551	GUCA1B
rs2144443	42203822	0.0213065	0.942551	GUCA1B
rs2144444	42203807	0.0213065	0.942551	GUCA1B
rs2180172	42200804	0.0213065	0.942551	GUCA1B
rs2273281	42214774	0.0213065	0.942551	GUCA1B
rs2273283	42214035	0.0213065	0.942551	GUCA1B
rs2295277	42210840	0.0213065	0.942551	GUCA1B
rs2295278	42208382	0.0213065	0.942551	GUCA1B
rs2395808	42200863	0.0213065	0.942551	GUCA1B
rs2894443	42204208	0.0213065	0.942551	GUCA1B
rs3199639	42207325	0.0213065	0.942551	GUCA1B
rs36172049	42209642	0.0213065	0.942551	GUCA1B
rs55734519	42209290	0.0213065	0.942551	GUCA1B
rs6924589	42201307	0.0213065	0.942551	GUCA1B
rs6925355	42201465	0.0213065	0.942551	GUCA1B
rs6929797	42207530	0.0213065	0.942551	GUCA1B
rs7754490	42205516	0.0213065	0.942551	GUCA1B
rs7765328	42215024	0.0213065	0.942551	GUCA1B
rs8850	42206873	0.0213065	0.942551	GUCA1B
rs9357390	42202618	0.0213065	0.942551	GUCA1B
rs9357391	42212367	0.0213065	0.942551	GUCA1B
rs9367134	42212666	0.0213065	0.942551	GUCA1B
rs9369349	42211215	0.0213065	0.942551	GUCA1B
rs9369350	42211353	0.0213065	0.942551	GUCA1B
rs9381158	42203047	0.0213065	0.942551	GUCA1B
rs9381159	42207246	0.0213065	0.942551	GUCA1B
rs2087840	60079066	0.276337	0.98007	HEATR6
rs8066241	60079788	0.276337	0.98007	HEATR6
rs1078378	60078969	0.169419	0.98007	HEATR6
rs10515177	60090124	0.0763248	0.98007	HEATR6
rs7219898	60090861	0.0763248	0.98007	HEATR6
rs8078068	60091623	0.0763248	0.98007	HEATR6
rs1141463	82419814	0.499989	0.989909	HEXD
rs4074069	82419530	0.499989	0.989909	HEXD
rs7938944	119083356	0.365087	0.97355	HMBS
rs7952700	119083484	0.308795	0.97355	HMBS
rs7127212	119082492	0.269967	0.97355	HMBS
rs1799991	119086381	0.0519175	0.97355	HMBS
rs3049231	43847087	0.1059	0.880676	HSD17B12
rs939015	43847101	0.1059	0.880676	HSD17B12
rs10768983	43818385	0.0767097	0.880676	HSD17B12
rs146635402	43855654	0.0767097	0.880676	HSD17B12
rs1518821	43850446	0.0767097	0.880676	HSD17B12
rs1518822	43850247	0.0767097	0.880676	HSD17B12
rs2139153	43837004	0.0767097	0.880676	HSD17B12
rs2139154	43837132	0.0767097	0.880676	HSD17B12
rs2863026	43817104	0.0767097	0.880676	HSD17B12
rs6485474	43846493	0.0767097	0.880676	HSD17B12
rs9971535	43840775	0.0767097	0.880676	HSD17B12
rs35251247	43856909	0.037974	0.880676	HSD17B12
rs10768984	43822650	0.00489322	0.880676	HSD17B12
rs1464230	43827204	0.00489322	0.880676	HSD17B12
rs2037297	43825155	0.00489322	0.880676	HSD17B12
rs2273514	94129652	1	0.999835	IFI27L2
rs34633971	112473591	0.349252	0.961188	IFRD1
rs1468458	112466177	0.280534	0.961188	IFRD1
rs6967593	112456737	0.13554	0.961188	IFRD1
rs1468457	112465957	0.117337	0.961188	IFRD1
rs3807213	112465699	0.117337	0.961188	IFRD1
rs2400589	81663548	0.450021	0.978725	IMPA1
rs2142316	81652967	0.190516	0.978725	IMPA1
rs2975935	81641748	0.133711	0.978725	IMPA1
rs1058401	81658396	0.112876	0.978725	IMPA1
rs1967328	81671536	0.112876	0.978725	IMPA1
rs2331964	121824051	0.0273332	0.903562	IQCB1
rs6808500	121791034	0.0233156	0.903562	IQCB1
rs12486499	121842798	0.0192294	0.903562	IQCB1
rs13096164	121840064	0.0192294	0.903562	IQCB1
rs1920321	121838404	0.0192294	0.903562	IQCB1
rs1920323	121842200	0.0192294	0.903562	IQCB1
rs34244477	121840047	0.0192294	0.903562	IQCB1
rs6766280	121842051	0.0192294	0.903562	IQCB1
rs72421117	121835005	0.0192294	0.903562	IQCB1
rs9834039	121833645	0.0192294	0.903562	IQCB1
rs11385481	121787279	0.0164079	0.903562	IQCB1
rs11716027	121785018	0.0164079	0.903562	IQCB1
rs3934935	121788899	0.0164079	0.903562	IQCB1
rs4073474	121788568	0.0164079	0.903562	IQCB1
rs6771049	121787240	0.0164079	0.903562	IQCB1
rs6771158	121787350	0.0164079	0.903562	IQCB1
rs6783659	121787077	0.0164079	0.903562	IQCB1
rs6783781	121787174	0.0164079	0.903562	IQCB1
rs6795182	121787035	0.0164079	0.903562	IQCB1
rs7612211	121785986	0.0164079	0.903562	IQCB1
rs7623743	121785890	0.0164079	0.903562	IQCB1
rs7626574	121786517	0.0164079	0.903562	IQCB1
rs10716121	121820735	0.014813	0.903562	IQCB1
rs1881994	121822494	0.014813	0.903562	IQCB1
rs1920293	121821169	0.014813	0.903562	IQCB1
rs1920296	121824730	0.014813	0.903562	IQCB1
rs4676694	121814135	0.014813	0.903562	IQCB1
rs6438675	121815338	0.014813	0.903562	IQCB1
rs6438677	121818148	0.014813	0.903562	IQCB1
rs6438678	121822540	0.014813	0.903562	IQCB1
rs6438679	121830933	0.014813	0.903562	IQCB1
rs6780316	121825244	0.014813	0.903562	IQCB1
rs6793073	121825146	0.014813	0.903562	IQCB1
rs6802715	121819951	0.014813	0.903562	IQCB1
rs7612301	121831119	0.014813	0.903562	IQCB1
rs7632786	121827664	0.014813	0.903562	IQCB1
rs9878426	121822463	0.014813	0.903562	IQCB1
rs4676756	121813792	0.0112912	0.903562	IQCB1
rs4257594	121804097	0.00905292	0.903562	IQCB1
rs4257595	121804365	0.00905292	0.903562	IQCB1
rs4543051	121807357	0.00905292	0.903562	IQCB1
rs4582090	121807252	0.00905292	0.903562	IQCB1
rs4645167	121803131	0.00905292	0.903562	IQCB1
rs4676752	121805061	0.00905292	0.903562	IQCB1
rs4676753	121809764	0.00905292	0.903562	IQCB1
rs56201969	121800817	0.00905292	0.903562	IQCB1
rs6438664	121791824	0.00905292	0.903562	IQCB1
rs6438665	121792170	0.00905292	0.903562	IQCB1
rs6438666	121796773	0.00905292	0.903562	IQCB1
rs6438669	121809539	0.00905292	0.903562	IQCB1
rs6781604	121811513	0.00905292	0.903562	IQCB1
rs6789860	121794241	0.00905292	0.903562	IQCB1
rs7619226	121805849	0.00905292	0.903562	IQCB1
rs7623662	121794772	0.00905292	0.903562	IQCB1
rs7624494	121812784	0.00905292	0.903562	IQCB1
rs7628439	121808672	0.00905292	0.903562	IQCB1
rs7642353	121800946	0.00905292	0.903562	IQCB1
rs7649273	121813068	0.00905292	0.903562	IQCB1
rs9877946	121797807	0.00905292	0.903562	IQCB1
rs9882971	121798689	0.00905292	0.903562	IQCB1
rs7642303	121765813	0.00764298	0.903562	IQCB1
rs4676755	121813788	0.00658652	0.903562	IQCB1
rs1135750	121770148	0.0063708	0.903562	IQCB1
rs13074133	121778624	0.0063708	0.903562	IQCB1
rs4676693	121777497	0.0063708	0.903562	IQCB1
rs4676747	121773934	0.0063708	0.903562	IQCB1
rs4676748	121775485	0.0063708	0.903562	IQCB1
rs4676749	121777466	0.0063708	0.903562	IQCB1
rs4676750	121777704	0.0063708	0.903562	IQCB1
rs6438655	121765975	0.0063708	0.903562	IQCB1
rs6438656	121766392	0.0063708	0.903562	IQCB1
rs6438662	121783014	0.0063708	0.903562	IQCB1
rs6438663	121783077	0.0063708	0.903562	IQCB1
rs6766694	121782223	0.0063708	0.903562	IQCB1
rs6775544	121778655	0.0063708	0.903562	IQCB1
rs6781175	121776210	0.0063708	0.903562	IQCB1
rs6782082	121780201	0.0063708	0.903562	IQCB1
rs6797347	121765117	0.0063708	0.903562	IQCB1
rs11804843	63460622	0.0999998	0.962267	ITGB3BP
rs12724335	63456211	0.0999998	0.962267	ITGB3BP
rs12747542	63457142	0.0999998	0.962267	ITGB3BP
rs12754236	63480593	0.0999998	0.962267	ITGB3BP
rs17125090	63523233	0.0999998	0.962267	ITGB3BP
rs17391823	63521194	0.0999998	0.962267	ITGB3BP
rs35888445	63511501	0.0999998	0.962267	ITGB3BP
rs36019623	63459570	0.0999998	0.962267	ITGB3BP
rs67831341	63498495	0.0999998	0.962267	ITGB3BP
rs7527536	63489337	0.0999998	0.962267	ITGB3BP
rs11697114	3203925	0.498658	0.95514	ITPA
rs71992021	3203873	0.498658	0.95514	ITPA
rs1056661	38684240	0.982354	0.968406	JOSD1
rs6580689	48652048	0.901733	0.986334	KANSL2
rs3741628	48654955	0.0470947	0.986334	KANSL2
rs10747554	48708504	0.0144057	0.986334	KANSL2
rs134613	29081396	0.642161	0.922318	KREMEN1
rs134626	29083902	0.0541073	0.922318	KREMEN1
rs5762980	29084917	0.0541073	0.922318	KREMEN1
rs134619	29082386	0.0145539	0.922318	KREMEN1
rs134620	29082772	0.0145539	0.922318	KREMEN1
rs134621	29082843	0.0145539	0.922318	KREMEN1
rs134623	29083205	0.0145539	0.922318	KREMEN1
rs134624	29083243	0.0145539	0.922318	KREMEN1
rs134625	29083896	0.0145539	0.922318	KREMEN1
rs134629	29084412	0.0145539	0.922318	KREMEN1
rs134630	29084754	0.0145539	0.922318	KREMEN1
rs134637	29086688	0.0134119	0.922318	KREMEN1
rs134638	29086737	0.0134119	0.922318	KREMEN1
rs134601	29077507	0.0123062	0.922318	KREMEN1
rs134602	29077896	0.0123062	0.922318	KREMEN1
rs134604	29078089	0.0123062	0.922318	KREMEN1
rs134605	29078289	0.0123062	0.922318	KREMEN1
rs134607	29079136	0.0123062	0.922318	KREMEN1
rs1465701	10568166	0.995946	0.964374	KRI1
rs77212229	97821267	0.0394964	0.896934	LAPTM4B
rs7843174	97813316	0.0249478	0.896934	LAPTM4B
rs10504979	97812652	0.0244494	0.896934	LAPTM4B
rs13259176	97811949	0.0244494	0.896934	LAPTM4B
rs13272843	97816689	0.0244494	0.896934	LAPTM4B
rs16892209	97812544	0.0244494	0.896934	LAPTM4B
rs34054579	97812405	0.0244494	0.896934	LAPTM4B
rs35236211	97812043	0.0244494	0.896934	LAPTM4B
rs35469226	97813439	0.0244494	0.896934	LAPTM4B
rs4236845	97817265	0.0244494	0.896934	LAPTM4B
rs4291238	97816496	0.0244494	0.896934	LAPTM4B
rs4574820	97817484	0.0244494	0.896934	LAPTM4B
rs4735498	97811598	0.0244494	0.896934	LAPTM4B
rs4735499	97811621	0.0244494	0.896934	LAPTM4B
rs4735500	97811622	0.0244494	0.896934	LAPTM4B
rs4735501	97814901	0.0244494	0.896934	LAPTM4B
rs4735502	97814981	0.0244494	0.896934	LAPTM4B
rs4735503	97815068	0.0244494	0.896934	LAPTM4B
rs62524083	97812756	0.0244494	0.896934	LAPTM4B
rs62524084	97812926	0.0244494	0.896934	LAPTM4B
rs62524085	97813006	0.0244494	0.896934	LAPTM4B
rs62524112	97816828	0.0244494	0.896934	LAPTM4B
rs62524113	97816931	0.0244494	0.896934	LAPTM4B
rs7813044	97814094	0.0244494	0.896934	LAPTM4B
rs7813751	97814455	0.0244494	0.896934	LAPTM4B
rs7843011	97813082	0.0244494	0.896934	LAPTM4B
rs7843594	97813498	0.0244494	0.896934	LAPTM4B
rs112327154	97821171	0.0179408	0.896934	LAPTM4B
rs13253987	97820468	0.0179408	0.896934	LAPTM4B
rs62524123	97820727	0.0179408	0.896934	LAPTM4B
rs7822059	97821545	0.0179408	0.896934	LAPTM4B
rs7843962	97821601	0.0179408	0.896934	LAPTM4B
rs11781700	97818957	0.0110995	0.896934	LAPTM4B
rs11784577	97818520	0.0110995	0.896934	LAPTM4B
rs11785288	97818690	0.0110995	0.896934	LAPTM4B
rs13261020	97812011	0.0110995	0.896934	LAPTM4B
rs2331657	97816304	0.0110995	0.896934	LAPTM4B
rs2331659	97816516	0.0110995	0.896934	LAPTM4B
rs3073521	97815987	0.0110995	0.896934	LAPTM4B
rs56036725	97818358	0.0110995	0.896934	LAPTM4B
rs62524114	97819349	0.0110995	0.896934	LAPTM4B
rs7002214	97817686	0.0110995	0.896934	LAPTM4B
rs7816307	97817923	0.0110995	0.896934	LAPTM4B
rs7818662	97815408	0.0110995	0.896934	LAPTM4B
rs7818775	97815303	0.0110995	0.896934	LAPTM4B
rs7831627	97814185	0.0110995	0.896934	LAPTM4B
rs36007296	97820161	0.00787994	0.896934	LAPTM4B
rs36028805	97819670	0.00787994	0.896934	LAPTM4B
rs35778396	97820007	0.00465013	0.896934	LAPTM4B
rs35208727	97819986	0.00393235	0.896934	LAPTM4B
rs35357093	97820103	0.00377679	0.896934	LAPTM4B
rs35974697	97820101	0.00173378	0.896934	LAPTM4B
rs11172841	58958650	0.13778	0.868069	LRIG3
rs10877192	58965332	0.0773996	0.868069	LRIG3
rs10877194	58965603	0.0773996	0.868069	LRIG3
rs11172842	58960531	0.0773996	0.868069	LRIG3
rs11172843	58961874	0.0773996	0.868069	LRIG3
rs4760249	58961174	0.0773996	0.868069	LRIG3
rs61919473	58963020	0.0773996	0.868069	LRIG3
rs7979941	58968924	0.0773996	0.868069	LRIG3
rs7300951	58959132	0.0650663	0.868069	LRIG3
rs11172851	58976053	0.041481	0.868069	LRIG3
rs7955741	58979241	0.041481	0.868069	LRIG3
rs11172834	58943584	0.0198774	0.868069	LRIG3
rs4760147	58989484	0.0129709	0.868069	LRIG3
rs4760252	58987653	0.0129709	0.868069	LRIG3
rs7306532	58988867	0.0129709	0.868069	LRIG3
rs11837281	58954167	0.0128231	0.868069	LRIG3
rs1436666	58953242	0.0128231	0.868069	LRIG3
rs61919468	58950376	0.0128231	0.868069	LRIG3
rs7133207	58947117	0.0128231	0.868069	LRIG3
rs7302452	58947036	0.0128231	0.868069	LRIG3
rs9973765	240897583	0.175902	0.818627	MAB21L4
rs10933517	240896921	0.108484	0.818627	MAB21L4
rs7600652	240889832	0.0399119	0.818627	MAB21L4
rs12105931	240897712	0.03989	0.818627	MAB21L4
rs6734159	240898096	0.03989	0.818627	MAB21L4
rs6711998	240889111	0.0339538	0.818627	MAB21L4
rs6759908	240889018	0.0339538	0.818627	MAB21L4
rs6760483	240889528	0.0339538	0.818627	MAB21L4
rs35733632	240891287	0.0297668	0.818627	MAB21L4
rs10206101	240896126	0.0230114	0.818627	MAB21L4
rs10933515	240896529	0.0230114	0.818627	MAB21L4
rs10933516	240896723	0.0230114	0.818627	MAB21L4
rs11893121	240888921	0.0224719	0.818627	MAB21L4
rs56290312	240888922	0.0224719	0.818627	MAB21L4
rs6708304	240888595	0.0214118	0.818627	MAB21L4
rs6709742	240892054	0.0175911	0.818627	MAB21L4
rs6724533	240892055	0.0175911	0.818627	MAB21L4
rs12105122	240895962	0.0161822	0.818627	MAB21L4
rs10933514	240896015	0.0145593	0.818627	MAB21L4
rs4468809	240895527	0.0145593	0.818627	MAB21L4
rs10171053	240891527	0.0118757	0.818627	MAB21L4
rs10171067	240891552	0.0118757	0.818627	MAB21L4
rs10173475	240895289	0.0118757	0.818627	MAB21L4
rs10195453	240891588	0.0118757	0.818627	MAB21L4
rs10933511	240890571	0.0118757	0.818627	MAB21L4
rs10933512	240893524	0.0118757	0.818627	MAB21L4
rs12105664	240893147	0.0118757	0.818627	MAB21L4
rs12105667	240893356	0.0118757	0.818627	MAB21L4
rs12464586	240890723	0.0118757	0.818627	MAB21L4
rs12472823	240890728	0.0118757	0.818627	MAB21L4
rs12477800	240890715	0.0118757	0.818627	MAB21L4
rs12477839	240890812	0.0118757	0.818627	MAB21L4
rs13390816	240894193	0.0118757	0.818627	MAB21L4
rs62186561	240892940	0.0118757	0.818627	MAB21L4
rs6709469	240891879	0.0118757	0.818627	MAB21L4
rs6718540	240894462	0.0118757	0.818627	MAB21L4
rs6721874	240894956	0.0118757	0.818627	MAB21L4
rs10829200	27174083	0.102573	0.944734	MASTL
rs11015590	27180749	0.102573	0.944734	MASTL
rs1981296	27170741	0.102573	0.944734	MASTL
rs2887190	27176899	0.102573	0.944734	MASTL
rs10829201	27180172	0.0266752	0.944734	MASTL
rs10829202	27180236	0.0266752	0.944734	MASTL
rs11015588	27179833	0.0266752	0.944734	MASTL
rs11015589	27180574	0.0266752	0.944734	MASTL
rs11597298	27169639	0.0266752	0.944734	MASTL
rs34842077	27171572	0.0266752	0.944734	MASTL
rs7079792	27178041	0.0266752	0.944734	MASTL
rs7079885	27178081	0.0266752	0.944734	MASTL
rs7091128	27177544	0.0266752	0.944734	MASTL
rs7091723	27177236	0.0266752	0.944734	MASTL
rs7894187	27174185	0.0266752	0.944734	MASTL
rs7910367	27174307	0.0266752	0.944734	MASTL
rs7918395	27175441	0.0266752	0.944734	MASTL
rs7919316	27178557	0.0266752	0.944734	MASTL
rs9299837	27174726	0.0266752	0.944734	MASTL
rs10764684	27184695	0.0225623	0.944734	MASTL
rs3758406	27156267	0.0225623	0.944734	MASTL
rs7068375	27165182	0.0225623	0.944734	MASTL
rs7070117	27161893	0.0225623	0.944734	MASTL
rs882474	27188936	0.0225623	0.944734	MASTL
rs3758403	27154694	0.0173451	0.944734	MASTL
rs10764685	27186081	0.00586754	0.944734	MASTL
rs10829197	27164102	0.00586754	0.944734	MASTL
rs4711510	37701865	0.818821	0.914644	MDGA1
rs9349050	37695848	0.181039	0.914644	MDGA1
rs10228972	130486822	0.36415	0.995911	MEST
rs10232290	130487019	0.36415	0.995911	MEST
rs3800564	130486107	0.253744	0.995911	MEST
rs10252756	73838940	0.0502249	0.954795	METTL27
rs1073909	73843959	0.0502249	0.954795	METTL27
rs1127155	73832131	0.0502249	0.954795	METTL27
rs6968360	73833402	0.0502249	0.954795	METTL27
rs10225983	73844420	0.0291928	0.954795	METTL27
rs10233067	73842590	0.0291928	0.954795	METTL27
rs10276377	73842508	0.0291928	0.954795	METTL27
rs10282443	73838913	0.0291928	0.954795	METTL27
rs1127156	73832166	0.0291928	0.954795	METTL27
rs13223593	73839442	0.0291928	0.954795	METTL27
rs13232463	73834969	0.0291928	0.954795	METTL27
rs13241921	73840482	0.0291928	0.954795	METTL27
rs13246460	73834835	0.0291928	0.954795	METTL27
rs13247441	73838813	0.0291928	0.954795	METTL27
rs1989670	73837589	0.0291928	0.954795	METTL27
rs4286826	73834256	0.0291928	0.954795	METTL27
rs4314544	73840922	0.0291928	0.954795	METTL27
rs4333464	73840835	0.0291928	0.954795	METTL27
rs4458741	73830849	0.0291928	0.954795	METTL27
rs4473910	73834332	0.0291928	0.954795	METTL27
rs4484569	73838570	0.0291928	0.954795	METTL27
rs4717109	73826661	0.0291928	0.954795	METTL27
rs6974182	73828647	0.0291928	0.954795	METTL27
rs6974378	73828809	0.0291928	0.954795	METTL27
rs7786850	73834242	0.0291928	0.954795	METTL27
rs7793169	73829884	0.0291928	0.954795	METTL27
rs7811317	73838777	0.0291928	0.954795	METTL27
rs7811711	73838770	0.0291928	0.954795	METTL27
rs8629	73831189	0.0291928	0.954795	METTL27
rs7809965	73843571	0.0205846	0.954795	METTL27
rs11287675	23914505	0.499966	0.995594	MIF
rs5751771	23916590	0.499966	0.995594	MIF
rs9296736	54059899	0.489461	0.812138	MLIP
rs9370260	54056876	0.489461	0.812138	MLIP
rs7770652	44116947	0.076042	0.829061	MRPL14
rs1891440	44123428	0.0758273	0.829061	MRPL14
rs2144510	44119846	0.0758273	0.829061	MRPL14
rs4714748	44122431	0.0758273	0.829061	MRPL14
rs6883	44113981	0.0758273	0.829061	MRPL14
rs713049	44124107	0.0758273	0.829061	MRPL14
rs9462964	44133539	0.0758273	0.829061	MRPL14
rs1569889	44121398	0.0392476	0.829061	MRPL14
rs1935611	44126005	0.0392476	0.829061	MRPL14
rs2396167	44120806	0.0392476	0.829061	MRPL14
rs6918252	44124800	0.0392476	0.829061	MRPL14
rs4714739	44096327	0.0367712	0.829061	MRPL14
rs4711767	44114250	0.0344239	0.829061	MRPL14
rs3841315	44134835	0.031683	0.829061	MRPL14
rs4714755	44138241	0.031683	0.829061	MRPL14
rs9381289	44102396	0.0192701	0.829061	MRPL14
rs2396165	44095480	0.0167539	0.829061	MRPL14
rs4714741	44098142	0.0167539	0.829061	MRPL14
rs12212365	44131824	0.0148283	0.829061	MRPL14
rs4714756	44138244	0.0148283	0.829061	MRPL14
rs1321097	44109619	0.0119386	0.829061	MRPL14
rs4714745	44109932	0.0119386	0.829061	MRPL14
rs7756283	44109043	0.0119386	0.829061	MRPL14
rs9394985	44113269	0.0119386	0.829061	MRPL14
rs2444765	68887595	0.464833	0.916947	MRPL21
rs544370	68885764	0.464833	0.916947	MRPL21
rs583182	68911166	0.0241082	0.916947	MRPL21
rs60397819	17340560	0.141389	0.824778	MRPL34
rs3810204	17337851	0.109669	0.824778	MRPL34
rs3745187	17303317	0.0917173	0.824778	MRPL34
rs4808621	17303458	0.0917173	0.824778	MRPL34
rs10259	17320106	0.0694274	0.824778	MRPL34
rs2363962	17321352	0.0694274	0.824778	MRPL34
rs7249329	17312564	0.0694274	0.824778	MRPL34
rs971693	17311840	0.0694274	0.824778	MRPL34
rs1544940	17304034	0.0629507	0.824778	MRPL34
rs4808622	17304648	0.0629507	0.824778	MRPL34
rs8110408	17329733	0.0500017	0.824778	MRPL34
rs8109328	17307146	0.0460978	0.824778	MRPL34
rs11086068	17309356	0.0313602	0.824778	MRPL34
rs9666165	73777201	0.73318	0.99058	MRPL48
rs7125433	73789881	0.205802	0.99058	MRPL48
rs71479547	73769885	0.0610177	0.99058	MRPL48
rs8067326	75265195	0.526299	0.985522	MRPS7
rs8075276	75261905	0.473651	0.985522	MRPS7
rs162034	7882866	0.466471	0.994259	MTRR
rs162036	7885846	0.466471	0.994259	MTRR
rs12347	7897170	0.0211641	0.994259	MTRR
rs4729620	100908908	0.295062	0.993418	MUC3A
rs7803865	100908172	0.295062	0.993418	MUC3A
rs4727469	100911543	0.151339	0.993418	MUC3A
rs4727470	100911581	0.151339	0.993418	MUC3A
rs6976053	100914499	0.0762215	0.993418	MUC3A
rs198460	61757502	0.999963	0.997776	MYRF
rs8081734	82490657	0.351689	0.854483	NARF
rs12936904	82452932	0.101533	0.854483	NARF
rs6502111	82453954	0.0648225	0.854483	NARF
rs9907135	82453223	0.0648225	0.854483	NARF
rs12941490	82458193	0.0256284	0.854483	NARF
rs28365943	82458214	0.0256284	0.854483	NARF
rs28365944	82458501	0.0256284	0.854483	NARF
rs28365945	82458523	0.0256284	0.854483	NARF
rs28365946	82458529	0.0256284	0.854483	NARF
rs28374204	82458516	0.0256284	0.854483	NARF
rs3840864	82457890	0.0256284	0.854483	NARF
rs4789689	82456887	0.0256284	0.854483	NARF
rs4789690	82457073	0.0256284	0.854483	NARF
rs4789691	82457125	0.0256284	0.854483	NARF
rs4789692	82457366	0.0256284	0.854483	NARF
rs57897512	82459865	0.0256284	0.854483	NARF
rs6502113	82457439	0.0256284	0.854483	NARF
rs7209788	82458038	0.0256284	0.854483	NARF
rs7218534	82458105	0.0256284	0.854483	NARF
rs10793337	78574830	0.207376	0.908561	NARS2
rs7940507	78573408	0.207376	0.908561	NARS2
rs7124803	78569777	0.102527	0.908561	NARS2
rs7942527	78569277	0.0956406	0.908561	NARS2
rs7945812	78569464	0.0956406	0.908561	NARS2
rs7129552	78564160	0.0522613	0.908561	NARS2
rs9666103	78562902	0.0522613	0.908561	NARS2
rs10793334	78567746	0.0413683	0.908561	NARS2
rs7937225	78567080	0.0413683	0.908561	NARS2
rs7101478	78561471	0.022189	0.908561	NARS2
rs7937417	78573425	0.00955498	0.908561	NARS2
rs4275650	78573777	0.00612228	0.908561	NARS2
rs4277140	78574051	0.00612228	0.908561	NARS2
rs4457782	78573688	0.00612228	0.908561	NARS2
rs4945301	78572317	0.00612228	0.908561	NARS2
rs10888639	39031147	0.243726	0.993773	NDUFS5
rs11205591	39035577	0.243726	0.993773	NDUFS5
rs3768324	39026790	0.243726	0.993773	NDUFS5
rs76289224	39028109	0.243726	0.993773	NDUFS5
rs321628	48014858	0.368373	0.989268	NIPAL1
rs321630	48016153	0.256132	0.989268	NIPAL1
rs321631	48016212	0.256132	0.989268	NIPAL1
rs13120847	48028019	0.013474	0.989268	NIPAL1
rs13146880	48029482	0.013474	0.989268	NIPAL1
rs4694879	48030339	0.013474	0.989268	NIPAL1
rs56823786	48029885	0.013474	0.989268	NIPAL1
rs6811245	48026772	0.013474	0.989268	NIPAL1
rs6832503	48026425	0.013474	0.989268	NIPAL1
rs10935341	139677916	0.931382	0.930854	NMNAT3
rs9871543	139675869	0.0126204	0.930854	NMNAT3
rs16849303	139674640	0.00949359	0.930854	NMNAT3
rs1295101	5996108	0.5	0.998992	NPHP4
rs806111	5993570	0.5	0.998992	NPHP4
rs6873998	74750831	0.988518	0.965661	NSA2
rs1436440	41824879	0.349924	0.95529	NT5C3B
rs11657944	41834105	0.0503572	0.95529	NT5C3B
rs1319763	41835538	0.0503572	0.95529	NT5C3B
rs1865841	41835736	0.0503572	0.95529	NT5C3B
rs8069503	41833410	0.0503572	0.95529	NT5C3B
rs8075291	41833514	0.0503572	0.95529	NT5C3B
rs1865842	41830502	0.0340446	0.95529	NT5C3B
rs4796713	41831109	0.0340446	0.95529	NT5C3B
rs35051135	41836371	0.0310767	0.95529	NT5C3B
rs9896980	41836970	0.0310767	0.95529	NT5C3B
rs9897034	41836332	0.0310767	0.95529	NT5C3B
rs1046403	41827568	0.0210098	0.95529	NT5C3B
rs1046404	41827556	0.0210098	0.95529	NT5C3B
rs1836880	41830232	0.0210098	0.95529	NT5C3B
rs2883065	41829334	0.0210098	0.95529	NT5C3B
rs3744781	41825899	0.0210098	0.95529	NT5C3B
rs4334345	41826738	0.0210098	0.95529	NT5C3B
rs6503667	41826012	0.0210098	0.95529	NT5C3B
rs7215297	41827910	0.0210098	0.95529	NT5C3B
rs8079567	41826109	0.0210098	0.95529	NT5C3B
rs12368209	103787094	1	0.965595	NT5DC3
rs138183330	73172092	0.0118475	0.852012	NUDT13
rs10437381	73149397	0.00847917	0.852012	NUDT13
rs10437382	73150790	0.00847917	0.852012	NUDT13
rs10450305	73180930	0.00847917	0.852012	NUDT13
rs10649699	73147122	0.00847917	0.852012	NUDT13
rs11000521	73111011	0.00847917	0.852012	NUDT13
rs11000522	73111095	0.00847917	0.852012	NUDT13
rs11000523	73111096	0.00847917	0.852012	NUDT13
rs11000527	73142596	0.00847917	0.852012	NUDT13
rs11000528	73146162	0.00847917	0.852012	NUDT13
rs11000530	73154498	0.00847917	0.852012	NUDT13
rs11000531	73154544	0.00847917	0.852012	NUDT13
rs11000532	73154641	0.00847917	0.852012	NUDT13
rs11000536	73164033	0.00847917	0.852012	NUDT13
rs11000541	73180323	0.00847917	0.852012	NUDT13
rs111382228	73116290	0.00847917	0.852012	NUDT13
rs111559429	73149339	0.00847917	0.852012	NUDT13
rs111727971	73105625	0.00847917	0.852012	NUDT13
rs112269036	73105345	0.00847917	0.852012	NUDT13
rs112594952	73105524	0.00847917	0.852012	NUDT13
rs112611329	73145101	0.00847917	0.852012	NUDT13
rs113063928	73157651	0.00847917	0.852012	NUDT13
rs113251857	73153324	0.00847917	0.852012	NUDT13
rs113418133	73138707	0.00847917	0.852012	NUDT13
rs12241374	73105809	0.00847917	0.852012	NUDT13
rs12249189	73136032	0.00847917	0.852012	NUDT13
rs12252862	73112973	0.00847917	0.852012	NUDT13
rs12254982	73140087	0.00847917	0.852012	NUDT13
rs12256576	73174556	0.00847917	0.852012	NUDT13
rs12257080	73178349	0.00847917	0.852012	NUDT13
rs12259758	73167311	0.00847917	0.852012	NUDT13
rs12260139	73160678	0.00847917	0.852012	NUDT13
rs12260168	73137933	0.00847917	0.852012	NUDT13
rs12262121	73138724	0.00847917	0.852012	NUDT13
rs12265339	73175280	0.00847917	0.852012	NUDT13
rs2271903	73134500	0.00847917	0.852012	NUDT13
rs2271905	73138058	0.00847917	0.852012	NUDT13
rs2280369	73110749	0.00847917	0.852012	NUDT13
rs2394916	73115455	0.00847917	0.852012	NUDT13
rs2395011	73181948	0.00847917	0.852012	NUDT13
rs2395012	73147632	0.00847917	0.852012	NUDT13
rs2894215	73131431	0.00847917	0.852012	NUDT13
rs3736518	73139376	0.00847917	0.852012	NUDT13
rs3750734	73119882	0.00847917	0.852012	NUDT13
rs3750735	73177748	0.00847917	0.852012	NUDT13
rs3763723	73167726	0.00847917	0.852012	NUDT13
rs3812618	73163374	0.00847917	0.852012	NUDT13
rs3812619	73163804	0.00847917	0.852012	NUDT13
rs3817395	73138498	0.00847917	0.852012	NUDT13
rs3829166	73119616	0.00847917	0.852012	NUDT13
rs3833730	73126634	0.00847917	0.852012	NUDT13
rs4341455	73181941	0.00847917	0.852012	NUDT13
rs57173610	73175964	0.00847917	0.852012	NUDT13
rs57787394	73175633	0.00847917	0.852012	NUDT13
rs58408264	73138953	0.00847917	0.852012	NUDT13
rs58598677	73175933	0.00847917	0.852012	NUDT13
rs58682074	73181069	0.00847917	0.852012	NUDT13
rs59313030	73125830	0.00847917	0.852012	NUDT13
rs60042442	73129236	0.00847917	0.852012	NUDT13
rs61290608	73174684	0.00847917	0.852012	NUDT13
rs6480670	73111984	0.00847917	0.852012	NUDT13
rs6480671	73141025	0.00847917	0.852012	NUDT13
rs6480672	73146789	0.00847917	0.852012	NUDT13
rs6480673	73150265	0.00847917	0.852012	NUDT13
rs6480675	73172696	0.00847917	0.852012	NUDT13
rs6480676	73172918	0.00847917	0.852012	NUDT13
rs6480677	73173444	0.00847917	0.852012	NUDT13
rs6480678	73176764	0.00847917	0.852012	NUDT13
rs6480679	73177012	0.00847917	0.852012	NUDT13
rs7068590	73143752	0.00847917	0.852012	NUDT13
rs7069813	73161324	0.00847917	0.852012	NUDT13
rs7069878	73152246	0.00847917	0.852012	NUDT13
rs7072168	73149824	0.00847917	0.852012	NUDT13
rs7075727	73123896	0.00847917	0.852012	NUDT13
rs7075865	73123998	0.00847917	0.852012	NUDT13
rs7075996	73178281	0.00847917	0.852012	NUDT13
rs7076327	73141177	0.00847917	0.852012	NUDT13
rs7077585	73120895	0.00847917	0.852012	NUDT13
rs7079875	73133660	0.00847917	0.852012	NUDT13
rs7080126	73133775	0.00847917	0.852012	NUDT13
rs7080133	73103661	0.00847917	0.852012	NUDT13
rs7090042	73165844	0.00847917	0.852012	NUDT13
rs7092445	73162234	0.00847917	0.852012	NUDT13
rs7093723	73166070	0.00847917	0.852012	NUDT13
rs719308	73162869	0.00847917	0.852012	NUDT13
rs719309	73162990	0.00847917	0.852012	NUDT13
rs74477872	73108659	0.00847917	0.852012	NUDT13
rs74490457	73144733	0.00847917	0.852012	NUDT13
rs75528082	73179969	0.00847917	0.852012	NUDT13
rs78622445	73116417	0.00847917	0.852012	NUDT13
rs78901711	73112717	0.00847917	0.852012	NUDT13
rs7894359	73104630	0.00847917	0.852012	NUDT13
rs7901619	73150711	0.00847917	0.852012	NUDT13
rs7901631	73127655	0.00847917	0.852012	NUDT13
rs7902035	73171874	0.00847917	0.852012	NUDT13
rs7903105	73129465	0.00847917	0.852012	NUDT13
rs7903695	73107025	0.00847917	0.852012	NUDT13
rs7905509	73151077	0.00847917	0.852012	NUDT13
rs7905557	73158643	0.00847917	0.852012	NUDT13
rs7905802	73158728	0.00847917	0.852012	NUDT13
rs7907329	73146706	0.00847917	0.852012	NUDT13
rs7908269	73109971	0.00847917	0.852012	NUDT13
rs7908606	73134205	0.00847917	0.852012	NUDT13
rs7909103	73104746	0.00847917	0.852012	NUDT13
rs7914726	73123459	0.00847917	0.852012	NUDT13
rs7916539	73118593	0.00847917	0.852012	NUDT13
rs7917179	73171973	0.00847917	0.852012	NUDT13
rs79174740	73116557	0.00847917	0.852012	NUDT13
rs7918443	73106825	0.00847917	0.852012	NUDT13
rs7923555	73176552	0.00847917	0.852012	NUDT13
rs79566656	73108522	0.00847917	0.852012	NUDT13
rs872457	73110033	0.00847917	0.852012	NUDT13
rs11029446	3719344	0.203725	0.815246	NUP98
rs10834920	3710078	0.121769	0.815246	NUP98
rs12292538	3708888	0.121769	0.815246	NUP98
rs10834966	3728355	0.0945603	0.815246	NUP98
rs10834967	3728466	0.0945603	0.815246	NUP98
rs34607553	3755820	0.0378698	0.815246	NUP98
rs11029620	3750694	0.0349368	0.815246	NUP98
rs11029681	3763661	0.0339161	0.815246	NUP98
rs61877603	3755876	0.0339161	0.815246	NUP98
rs12279623	3790934	0.0335325	0.815246	NUP98
rs12284204	3790935	0.0335325	0.815246	NUP98
rs12273346	3792133	0.0240266	0.815246	NUP98
rs34960028	3791877	0.0240266	0.815246	NUP98
rs7924315	3790295	0.0240266	0.815246	NUP98
rs10767587	3786908	0.0137583	0.815246	NUP98
rs10767588	3786995	0.0128869	0.815246	NUP98
rs7111312	3749970	0.0116027	0.815246	NUP98
rs334048	178152266	1	0.974128	OSBPL6
rs10045510	140233603	0.0319097	0.936391	PFDN1
rs10055141	140237024	0.0319097	0.936391	PFDN1
rs10060203	140219734	0.0319097	0.936391	PFDN1
rs10477319	140224289	0.0319097	0.936391	PFDN1
rs13163983	140242987	0.0319097	0.936391	PFDN1
rs13175751	140221512	0.0319097	0.936391	PFDN1
rs13188675	140227133	0.0319097	0.936391	PFDN1
rs13353859	140240870	0.0319097	0.936391	PFDN1
rs13359060	140225617	0.0319097	0.936391	PFDN1
rs17118759	140237822	0.0319097	0.936391	PFDN1
rs28450136	140218505	0.0319097	0.936391	PFDN1
rs28573694	140230366	0.0319097	0.936391	PFDN1
rs28722951	140230367	0.0319097	0.936391	PFDN1
rs34675890	140242687	0.0319097	0.936391	PFDN1
rs35277761	140229824	0.0319097	0.936391	PFDN1
rs3822739	140246158	0.0319097	0.936391	PFDN1
rs4912707	140244876	0.0319097	0.936391	PFDN1
rs4913072	140228768	0.0319097	0.936391	PFDN1
rs4913073	140233269	0.0319097	0.936391	PFDN1
rs4913074	140233982	0.0319097	0.936391	PFDN1
rs4913078	140247095	0.0319097	0.936391	PFDN1
rs6872923	140216087	0.0319097	0.936391	PFDN1
rs6878006	140216166	0.0319097	0.936391	PFDN1
rs7203	140245285	0.0319097	0.936391	PFDN1
rs7204	140245279	0.0319097	0.936391	PFDN1
rs7703595	140231605	0.0319097	0.936391	PFDN1
rs7704262	140231458	0.0319097	0.936391	PFDN1
rs7715649	140225932	0.0319097	0.936391	PFDN1
rs7722986	140237801	0.0319097	0.936391	PFDN1
rs7737342	140231426	0.0319097	0.936391	PFDN1
rs2154535	37116608	0.20837	0.916034	PIGP
rs1473807	37100873	0.0980715	0.916034	PIGP
rs2032088	37105030	0.0980715	0.916034	PIGP
rs9983781	37110417	0.0980715	0.916034	PIGP
rs7280542	37072695	0.0867705	0.916034	PIGP
rs6517403	37107969	0.0860633	0.916034	PIGP
rs8130549	37114987	0.0750274	0.916034	PIGP
rs9680286	37112694	0.0750274	0.916034	PIGP
rs8131246	37079626	0.0601126	0.916034	PIGP
rs2835610	37123549	0.0373004	0.916034	PIGP
rs3819262	37088590	0.0238725	0.916034	PIGP
rs56342756	37088591	0.0238725	0.916034	PIGP
rs147248866	100299852	0.696485	0.894281	PILRB
rs111312383	100307702	0.286661	0.894281	PILRB
rs10139953	67394019	0.435776	0.978259	PLEK2
rs7153725	67399954	0.155444	0.978259	PLEK2
rs2296562	67392959	0.10036	0.978259	PLEK2
rs7157704	67397105	0.0999764	0.978259	PLEK2
rs8005756	67398039	0.0999764	0.978259	PLEK2
rs8005876	67398044	0.0999764	0.978259	PLEK2
rs782652	55635640	0.162725	0.902552	PNPT1
rs2586954	55665126	0.0589134	0.902552	PNPT1
rs2627779	55665221	0.0589134	0.902552	PNPT1
rs7598650	55558388	0.058063	0.902552	PNPT1
rs782650	55633264	0.0403828	0.902552	PNPT1
rs10460508	55655430	0.0389583	0.902552	PNPT1
rs10579642	55645834	0.0389583	0.902552	PNPT1
rs2627776	55646166	0.0389583	0.902552	PNPT1
rs2627777	55646080	0.0389583	0.902552	PNPT1
rs782566	55653047	0.0389583	0.902552	PNPT1
rs782567	55654122	0.0389583	0.902552	PNPT1
rs782568	55654403	0.0389583	0.902552	PNPT1
rs782606	55659467	0.0359924	0.902552	PNPT1
rs782649	55633173	0.0220547	0.902552	PNPT1
rs2627772	55671795	0.0207839	0.902552	PNPT1
rs782599	55620288	0.0132947	0.902552	PNPT1
rs782632	55671155	0.0104494	0.902552	PNPT1
rs782633	55671068	0.0104494	0.902552	PNPT1
rs782600	55620905	0.00930011	0.902552	PNPT1
rs782601	55621109	0.00930011	0.902552	PNPT1
rs782602	55622174	0.00930011	0.902552	PNPT1
rs2586947	55626874	0.00883574	0.902552	PNPT1
rs782637	55667112	0.00872065	0.902552	PNPT1
rs3762513	55535821	0.00804125	0.902552	PNPT1
rs11280083	55537618	0.00686047	0.902552	PNPT1
rs7594279	55584937	0.00626064	0.902552	PNPT1
rs1058582	55547933	0.00612228	0.902552	PNPT1
rs11125581	55569391	0.00612228	0.902552	PNPT1
rs138620660	55572221	0.00612228	0.902552	PNPT1
rs1823893	55561785	0.00612228	0.902552	PNPT1
rs4672054	55545957	0.00612228	0.902552	PNPT1
rs4672055	55570095	0.00612228	0.902552	PNPT1
rs4672056	55570167	0.00612228	0.902552	PNPT1
rs58003472	55570371	0.00612228	0.902552	PNPT1
rs62165181	55551214	0.00612228	0.902552	PNPT1
rs62165184	55561117	0.00612228	0.902552	PNPT1
rs6545506	55570972	0.00612228	0.902552	PNPT1
rs782586	55609029	0.0053739	0.902552	PNPT1
rs62165182	55559175	0.0052773	0.902552	PNPT1
rs782595	55618461	0.00467438	0.902552	PNPT1
rs2627769	55700153	0.0044125	0.902552	PNPT1
rs782642	55701309	0.0044125	0.902552	PNPT1
rs2627773	55673324	0.00404467	0.902552	PNPT1
rs782629	55673148	0.00404467	0.902552	PNPT1
rs782630	55672290	0.00404467	0.902552	PNPT1
rs17369191	55530749	0.00361434	0.902552	PNPT1
rs10585757	55620108	0.00353853	0.902552	PNPT1
rs55761024	55546737	0.00351177	0.902552	PNPT1
rs1084522	55616158	0.00340818	0.902552	PNPT1
rs782594	55617309	0.00340818	0.902552	PNPT1
rs3732419	119477487	0.303805	0.994107	POGLUT1
rs6799691	119477934	0.303805	0.994107	POGLUT1
rs56224714	119473338	0.196195	0.994107	POGLUT1
rs6794833	119472551	0.196195	0.994107	POGLUT1
rs6713396	25161836	0.947884	0.98853	POMC
rs7591899	25166290	0.0284804	0.98853	POMC
rs17103034	35091333	0.844428	0.949961	PPP2R3C
rs2899830	35124393	0.0306646	0.949961	PPP2R3C
rs8005406	35093873	0.0306063	0.949961	PPP2R3C
rs8006884	35094005	0.0306063	0.949961	PPP2R3C
rs28765972	35129164	0.00666941	0.949961	PPP2R3C
rs1056879	35121968	0.00661211	0.949961	PPP2R3C
rs11851907	35121615	0.00661211	0.949961	PPP2R3C
rs28362590	177304451	1	0.999715	PRELID1
rs1623927	107053498	0.491357	0.981817	PRMT6
rs1730850	107055366	0.491357	0.981817	PRMT6
rs1344477	29567360	0.988864	0.996409	PRR15
rs1060817	120820914	0.403745	0.994051	PSMD5
rs10760117	120824459	0.403745	0.994051	PSMD5
rs3793638	120820419	0.143404	0.994051	PSMD5
rs12740374	109274968	0.96238	0.994317	PSRC1
rs235314	44851537	1	0.993121	PTTG1IP
rs2417980	21438894	0.0665663	0.838132	PYROXD1
rs1024733	21444670	0.0130419	0.838132	PYROXD1
rs10707147	21446323	0.0130419	0.838132	PYROXD1
rs10770813	21454580	0.0130419	0.838132	PYROXD1
rs10841815	21451584	0.0130419	0.838132	PYROXD1
rs10841816	21452543	0.0130419	0.838132	PYROXD1
rs11046055	21447705	0.0130419	0.838132	PYROXD1
rs11046056	21447803	0.0130419	0.838132	PYROXD1
rs11046057	21447904	0.0130419	0.838132	PYROXD1
rs11046058	21447906	0.0130419	0.838132	PYROXD1
rs11046059	21447919	0.0130419	0.838132	PYROXD1
rs11046060	21447931	0.0130419	0.838132	PYROXD1
rs11046064	21452432	0.0130419	0.838132	PYROXD1
rs11046065	21452552	0.0130419	0.838132	PYROXD1
rs11608659	21442558	0.0130419	0.838132	PYROXD1
rs11608682	21442699	0.0130419	0.838132	PYROXD1
rs1476904	21445950	0.0130419	0.838132	PYROXD1
rs1476906	21447472	0.0130419	0.838132	PYROXD1
rs1476907	21447509	0.0130419	0.838132	PYROXD1
rs1963330	21445261	0.0130419	0.838132	PYROXD1
rs2159947	21448557	0.0130419	0.838132	PYROXD1
rs2159948	21448569	0.0130419	0.838132	PYROXD1
rs2192179	21454745	0.0130419	0.838132	PYROXD1
rs2192182	21455077	0.0130419	0.838132	PYROXD1
rs2192183	21455109	0.0130419	0.838132	PYROXD1
rs2215734	21451174	0.0130419	0.838132	PYROXD1
rs2302499	21455798	0.0130419	0.838132	PYROXD1
rs2302500	21455957	0.0130419	0.838132	PYROXD1
rs2417984	21448998	0.0130419	0.838132	PYROXD1
rs3061475	21444679	0.0130419	0.838132	PYROXD1
rs34521099	21441744	0.0130419	0.838132	PYROXD1
rs3759229	21452223	0.0130419	0.838132	PYROXD1
rs3919535	21454578	0.0130419	0.838132	PYROXD1
rs4388943	21456288	0.0130419	0.838132	PYROXD1
rs4388944	21456354	0.0130419	0.838132	PYROXD1
rs4762827	21450104	0.0130419	0.838132	PYROXD1
rs4762828	21450105	0.0130419	0.838132	PYROXD1
rs4762829	21450410	0.0130419	0.838132	PYROXD1
rs4762830	21452573	0.0130419	0.838132	PYROXD1
rs4762831	21452584	0.0130419	0.838132	PYROXD1
rs4762832	21452688	0.0130419	0.838132	PYROXD1
rs4762833	21452821	0.0130419	0.838132	PYROXD1
rs6487224	21441395	0.0130419	0.838132	PYROXD1
rs6487226	21457093	0.0130419	0.838132	PYROXD1
rs7134243	21450867	0.0130419	0.838132	PYROXD1
rs7136175	21442130	0.0130419	0.838132	PYROXD1
rs7136257	21442456	0.0130419	0.838132	PYROXD1
rs7136265	21442480	0.0130419	0.838132	PYROXD1
rs7137034	21442790	0.0130419	0.838132	PYROXD1
rs714356	21444312	0.0130419	0.838132	PYROXD1
rs714357	21444580	0.0130419	0.838132	PYROXD1
rs7294351	21455585	0.0130419	0.838132	PYROXD1
rs7295417	21443181	0.0130419	0.838132	PYROXD1
rs7295570	21443507	0.0130419	0.838132	PYROXD1
rs7296273	21443857	0.0130419	0.838132	PYROXD1
rs7303408	21450885	0.0130419	0.838132	PYROXD1
rs7308263	21443084	0.0130419	0.838132	PYROXD1
rs7310953	21448828	0.0130419	0.838132	PYROXD1
rs74962202	21457163	0.0130419	0.838132	PYROXD1
rs7964140	21456799	0.0130419	0.838132	PYROXD1
rs7964568	21456973	0.0130419	0.838132	PYROXD1
rs7966443	21453197	0.0130419	0.838132	PYROXD1
rs7980058	21453193	0.0130419	0.838132	PYROXD1
rs7980474	21453835	0.0130419	0.838132	PYROXD1
rs7980957	21454064	0.0130419	0.838132	PYROXD1
rs10770812	21451806	0.0119855	0.838132	PYROXD1
rs11046050	21440875	0.00624707	0.838132	PYROXD1
rs2058464	21437687	0.00561116	0.838132	PYROXD1
rs2110165	21437854	0.00561116	0.838132	PYROXD1
rs2417981	21438913	0.00561116	0.838132	PYROXD1
rs2417982	21438987	0.00561116	0.838132	PYROXD1
rs2417983	21439160	0.00561116	0.838132	PYROXD1
rs6487222	21437292	0.00561116	0.838132	PYROXD1
rs1775151	205776556	0.220691	0.952833	RAB29
rs1775159	205784684	0.219149	0.952833	RAB29
rs1775158	205784547	0.204851	0.952833	RAB29
rs863725	205782068	0.106555	0.952833	RAB29
rs885224	205783969	0.106555	0.952833	RAB29
rs823144	205775418	0.103909	0.952833	RAB29
rs196422	24541244	0.99972	0.977214	RCAN3
rs139225929	112356427	0.279883	0.936819	RGPD8
rs55979927	112358021	0.279883	0.936819	RGPD8
rs13386802	112425888	0.0781683	0.936819	RGPD8
rs13386945	112426079	0.0781683	0.936819	RGPD8
rs13422242	112432634	0.0781683	0.936819	RGPD8
rs34510112	112431341	0.0781683	0.936819	RGPD8
rs71414642	112429728	0.0781683	0.936819	RGPD8
rs11544008	113185754	0.067902	0.834355	RITA1
rs2290766	113185436	0.067902	0.834355	RITA1
rs61941448	113190944	0.067902	0.834355	RITA1
rs61941452	113198460	0.067902	0.834355	RITA1
rs7303491	113180663	0.067902	0.834355	RITA1
rs73208725	113181198	0.067902	0.834355	RITA1
rs7342367	113212014	0.067902	0.834355	RITA1
rs75598453	113183046	0.067902	0.834355	RITA1
rs7970839	113199638	0.067902	0.834355	RITA1
rs7970993	113199779	0.067902	0.834355	RITA1
rs16942628	113224078	0.0235685	0.834355	RITA1
rs7138630	113227197	0.0235685	0.834355	RITA1
rs7297130	113221455	0.0235685	0.834355	RITA1
rs7297749	113221947	0.0235685	0.834355	RITA1
rs7312205	113205627	0.0185876	0.834355	RITA1
rs61943589	113236407	0.018241	0.834355	RITA1
rs61943590	113237512	0.018241	0.834355	RITA1
rs7312573	113243483	0.018241	0.834355	RITA1
rs73192820	113243794	0.018241	0.834355	RITA1
rs73192824	113252591	0.018241	0.834355	RITA1
rs77458805	113243362	0.018241	0.834355	RITA1
rs60005892	113204944	0.0165636	0.834355	RITA1
rs61941447	113190286	0.0109833	0.834355	RITA1
rs61943635	113280096	0.00910627	0.834355	RITA1
rs6489896	113281983	0.00910627	0.834355	RITA1
rs2305899	113177019	0.00538998	0.834355	RITA1
rs10902748	26491334	0.0631262	0.94787	RPS6KA1
rs11802779	26495397	0.0631262	0.94787	RPS6KA1
rs12024530	26485807	0.0631262	0.94787	RPS6KA1
rs7530096	26493727	0.0631262	0.94787	RPS6KA1
rs4970498	26517704	0.0410158	0.94787	RPS6KA1
rs12094989	26521895	0.0399444	0.94787	RPS6KA1
rs7539320	26524174	0.0399444	0.94787	RPS6KA1
rs4659443	26497140	0.0383263	0.94787	RPS6KA1
rs4659444	26498625	0.0383263	0.94787	RPS6KA1
rs12086684	26510576	0.0364834	0.94787	RPS6KA1
rs12045800	26518875	0.0303836	0.94787	RPS6KA1
rs6669111	26501691	0.0279862	0.94787	RPS6KA1
rs6693662	26494739	0.0279862	0.94787	RPS6KA1
rs61789119	26513419	0.0266405	0.94787	RPS6KA1
rs7521032	26513087	0.0266405	0.94787	RPS6KA1
rs4970514	26519704	0.0249022	0.94787	RPS6KA1
rs55840663	26514335	0.0249022	0.94787	RPS6KA1
rs7524245	26483970	0.0233762	0.94787	RPS6KA1
rs11247958	26440876	0.0233257	0.94787	RPS6KA1
rs10458599	26521463	0.0225508	0.94787	RPS6KA1
rs56241541	26514413	0.0181838	0.94787	RPS6KA1
rs12046497	26521149	0.017317	0.94787	RPS6KA1
rs4970466	26522821	0.017317	0.94787	RPS6KA1
rs61692526	26523415	0.017317	0.94787	RPS6KA1
rs2045344	26492393	0.0171869	0.94787	RPS6KA1
rs2045345	26492403	0.0171869	0.94787	RPS6KA1
rs61789103	26492392	0.0171869	0.94787	RPS6KA1
rs61789104	26492394	0.0171869	0.94787	RPS6KA1
rs12093376	26523482	0.0145852	0.94787	RPS6KA1
rs2290588	26471017	0.0141619	0.94787	RPS6KA1
rs3816539	26460136	0.0141619	0.94787	RPS6KA1
rs6690458	26463296	0.0141619	0.94787	RPS6KA1
rs7522551	26445967	0.0141619	0.94787	RPS6KA1
rs1048442	97400395	0.16655	0.87928	RRP12
rs10882926	97400933	0.16655	0.87928	RRP12
rs2297668	97400289	0.16655	0.87928	RRP12
rs9887991	97399877	0.16655	0.87928	RRP12
rs9888026	97400112	0.16655	0.87928	RRP12
rs9888117	97400206	0.16655	0.87928	RRP12
rs131168	44500345	0.724969	0.905251	RTL6
rs131163	44496255	0.143733	0.905251	RTL6
rs6007167	44492244	0.0211211	0.905251	RTL6
rs105248	44495519	0.0208501	0.905251	RTL6
rs131156	44495490	0.0208501	0.905251	RTL6
rs131157	44495842	0.0208501	0.905251	RTL6
rs12323987	82186086	0.0842434	0.860598	SAXO2
rs12439569	82198356	0.0842434	0.860598	SAXO2
rs61413136	82170788	0.0842434	0.860598	SAXO2
rs116286063	82276937	0.0439482	0.860598	SAXO2
rs12437458	82278860	0.0439482	0.860598	SAXO2
rs149892112	82262805	0.0439482	0.860598	SAXO2
rs58303451	82273728	0.0439482	0.860598	SAXO2
rs79777326	82271865	0.0439482	0.860598	SAXO2
rs10152239	82156069	0.0281517	0.860598	SAXO2
rs10152266	82158062	0.0281517	0.860598	SAXO2
rs10152316	82158177	0.0281517	0.860598	SAXO2
rs111421657	82148207	0.0281517	0.860598	SAXO2
rs112659606	82151246	0.0281517	0.860598	SAXO2
rs12442609	82167013	0.0281517	0.860598	SAXO2
rs12442655	82190186	0.0281517	0.860598	SAXO2
rs12442682	82190248	0.0281517	0.860598	SAXO2
rs12442862	82177552	0.0281517	0.860598	SAXO2
rs13380011	82164714	0.0281517	0.860598	SAXO2
rs143219850	82154542	0.0281517	0.860598	SAXO2
rs57598148	82167244	0.0281517	0.860598	SAXO2
rs74381346	82159637	0.0281517	0.860598	SAXO2
rs77341284	82158678	0.0281517	0.860598	SAXO2
rs77617238	82184320	0.0281517	0.860598	SAXO2
rs78664413	82151483	0.0281517	0.860598	SAXO2
rs9972386	82161942	0.0281517	0.860598	SAXO2
rs6682862	177969302	1	0.999989	SEC16B
rs2068278	42553909	0.124499	0.899646	SEC22C
rs663258	42552527	0.124499	0.899646	SEC22C
rs237064	42549954	0.0829473	0.899646	SEC22C
rs342523	42546454	0.0829473	0.899646	SEC22C
rs13066173	42554347	0.0558135	0.899646	SEC22C
rs13066333	42554422	0.0558135	0.899646	SEC22C
rs2271184	42557599	0.0558135	0.899646	SEC22C
rs342535	42550646	0.0558135	0.899646	SEC22C
rs342538	42551410	0.0558135	0.899646	SEC22C
rs9311324	42563910	0.0558135	0.899646	SEC22C
rs9813479	42566472	0.0558135	0.899646	SEC22C
rs664813	42587715	0.0550477	0.899646	SEC22C
rs9828279	42574805	0.0470292	0.899646	SEC22C
rs704982	42588131	0.0171035	0.899646	SEC22C
rs9819563	42567822	0.00866494	0.899646	SEC22C
rs168138	42626949	0.00759684	0.899646	SEC22C
rs72319383	42600539	0.00664351	0.899646	SEC22C
rs339735	42622451	0.00605846	0.899646	SEC22C
rs11711022	125207860	0.243203	0.988186	SLC12A8
rs11718838	125207848	0.243203	0.988186	SLC12A8
rs11718913	125207859	0.243203	0.988186	SLC12A8
rs9872582	125207904	0.243203	0.988186	SLC12A8
rs2270450	46677138	0.995274	0.94971	SLC25A27
rs4843002	84907687	0.853958	0.901363	SLC28A1
rs4076648	84906352	0.074282	0.901363	SLC28A1
rs2290270	84905453	0.0634884	0.901363	SLC28A1
rs2668222	112598003	0.0987219	0.928981	SLC35A5
rs2172196	112598444	0.0937776	0.928981	SLC35A5
rs2668217	112591712	0.0937776	0.928981	SLC35A5
rs2668220	112594893	0.0937776	0.928981	SLC35A5
rs2668223	112598561	0.0937776	0.928981	SLC35A5
rs2705543	112596375	0.0937776	0.928981	SLC35A5
rs34862701	112591069	0.0937776	0.928981	SLC35A5
rs35352244	112593796	0.0937776	0.928981	SLC35A5
rs2668214	112571989	0.0661522	0.928981	SLC35A5
rs2464611	112565505	0.0323227	0.928981	SLC35A5
rs2638031	112568913	0.0279784	0.928981	SLC35A5
rs11706550	112589440	0.00571295	0.928981	SLC35A5
rs1512005	112585765	0.00571295	0.928981	SLC35A5
rs1877363	112584337	0.00571295	0.928981	SLC35A5
rs1994713	112585382	0.00571295	0.928981	SLC35A5
rs2280066	112599287	0.00571295	0.928981	SLC35A5
rs28866814	112589992	0.00571295	0.928981	SLC35A5
rs34105669	112589628	0.00571295	0.928981	SLC35A5
rs34233684	112566278	0.00571295	0.928981	SLC35A5
rs3732815	112598088	0.00571295	0.928981	SLC35A5
rs7652377	112564045	0.00571295	0.928981	SLC35A5
rs9288954	112594748	0.00571295	0.928981	SLC35A5
rs9866734	112592943	0.00571295	0.928981	SLC35A5
rs12048606	94826935	1	0.999869	SLC44A3
rs1958078	69888141	1	1	SMOC1
rs138945386	20944404	0.342885	0.865734	SNAP29
rs2023715	20946556	0.342885	0.865734	SNAP29
rs5761460	20942963	0.31408	0.865734	SNAP29
rs4774514	45081857	0.999209	0.845896	SORD
rs12740374	109274968	1	0.998974	SORT1
rs10832570	16227964	0.19686	0.980786	SOX6
rs1401454	16228637	0.19686	0.980786	SOX6
rs2030291	16229705	0.19686	0.980786	SOX6
rs2351958	16226474	0.196477	0.980786	SOX6
rs1519125	16223042	0.159352	0.980786	SOX6
rs1837095	16224146	0.031157	0.980786	SOX6
rs9890200	50547162	0.990716	0.998334	SPATA20
rs12961966	12552633	0.329782	0.987653	SPIRE1
rs12964660	12556647	0.329782	0.987653	SPIRE1
rs34456643	12565251	0.329782	0.987653	SPIRE1
rs11070353	41899321	0.860825	0.842186	SPTBN5
rs28547280	41910449	0.132599	0.842186	SPTBN5
rs1994604	112613804	0.277936	0.980137	ST7L
rs6700673	112614432	0.277936	0.980137	ST7L
rs7546094	112611778	0.277936	0.980137	ST7L
rs6669096	112589739	0.097988	0.980137	ST7L
rs11102512	112602772	0.0315128	0.980137	ST7L
rs2787015	109466812	0.996168	0.975237	SYPL2
rs9590039	94585900	0.985345	0.996736	TGDS
rs6547758	88170344	1	0.99288	THNSL2
rs12832926	66143764	0.263265	0.923288	TMBIM4
rs17767200	66143554	0.263265	0.923288	TMBIM4
rs10878382	66130108	0.0969817	0.923288	TMBIM4
rs11176054	66137823	0.0969817	0.923288	TMBIM4
rs11176056	66139549	0.0969817	0.923288	TMBIM4
rs35450292	66137840	0.0969817	0.923288	TMBIM4
rs34645929	66136252	0.0202078	0.923288	TMBIM4
rs34755483	66136239	0.0202078	0.923288	TMBIM4
rs11066117	111994905	0.112093	0.963533	TMEM116
rs11066119	111996700	0.112093	0.963533	TMEM116
rs7134638	111995607	0.112093	0.963533	TMEM116
rs10849992	112005213	0.033186	0.963533	TMEM116
rs11066118	111996348	0.033186	0.963533	TMEM116
rs11066120	111998391	0.033186	0.963533	TMEM116
rs11066127	112008551	0.033186	0.963533	TMEM116
rs11066128	112012950	0.033186	0.963533	TMEM116
rs12300496	112012629	0.033186	0.963533	TMEM116
rs12423960	112004612	0.033186	0.963533	TMEM116
rs12426505	112004484	0.033186	0.963533	TMEM116
rs1880871	112014458	0.033186	0.963533	TMEM116
rs57439171	112001483	0.033186	0.963533	TMEM116
rs58368428	112024471	0.033186	0.963533	TMEM116
rs7132863	112011079	0.033186	0.963533	TMEM116
rs7296841	112006305	0.033186	0.963533	TMEM116
rs7310545	112006156	0.033186	0.963533	TMEM116
rs7312472	112000966	0.033186	0.963533	TMEM116
rs7313773	112003884	0.033186	0.963533	TMEM116
rs7314232	112006713	0.033186	0.963533	TMEM116
rs7316563	112015831	0.033186	0.963533	TMEM116
rs7316650	112001860	0.033186	0.963533	TMEM116
rs10272702	143261090	0.956951	0.827791	TMEM139
rs7599	35547488	1	0.999998	TMEM147
rs10276099	22823331	0.142092	0.983563	TOMM7
rs2270103	22823103	0.142092	0.983563	TOMM7
rs2270105	22822848	0.142092	0.983563	TOMM7
rs2270107	22822564	0.142092	0.983563	TOMM7
rs2270108	22822512	0.142092	0.983563	TOMM7
rs4722189	22820855	0.142092	0.983563	TOMM7
rs981792	22822020	0.142092	0.983563	TOMM7
rs6572720	51029484	0.998268	0.999001	TRIM9
rs7812363	124457806	0.623249	0.935349	TRMT12
rs4132855	124449880	0.14111	0.935349	TRMT12
rs7830506	124466627	0.0994481	0.935349	TRMT12
rs3812472	124474526	0.0261781	0.935349	TRMT12
rs7812911	124449046	0.0123981	0.935349	TRMT12
rs3812474	124450857	0.0123025	0.935349	TRMT12
rs3812475	124451009	0.0120967	0.935349	TRMT12
rs11987932	124446302	0.00889716	0.935349	TRMT12
rs3812471	124486306	0.00749672	0.935349	TRMT12
rs6993926	124489648	0.00749672	0.935349	TRMT12
rs143801555	46291962	0.199999	0.859482	TTC38
rs57866552	46293332	0.199999	0.859482	TTC38
rs6008552	46292311	0.199999	0.859482	TTC38
rs6008553	46292424	0.199999	0.859482	TTC38
rs73886792	46291323	0.199999	0.859482	TTC38
rs11715391	52246362	0.136894	0.860458	TWF2
rs4082828	52240726	0.136894	0.860458	TWF2
rs7638204	52244225	0.136894	0.860458	TWF2
rs7628461	52238012	0.11031	0.860458	TWF2
rs17052052	52297777	0.0713642	0.860458	TWF2
rs35976326	52291023	0.0713642	0.860458	TWF2
rs55676974	52294008	0.0713642	0.860458	TWF2
rs17052054	52303738	0.0309566	0.860458	TWF2
rs7615405	52317537	0.0309566	0.860458	TWF2
rs11710014	52325956	0.0217443	0.860458	TWF2
rs11711914	52242885	0.0188798	0.860458	TWF2
rs11714358	52269584	0.0160938	0.860458	TWF2
rs1769	52256534	0.0160938	0.860458	TWF2
rs3210487	52259843	0.0160938	0.860458	TWF2
rs73088773	52252569	0.0160938	0.860458	TWF2
rs7643913	52269197	0.0160938	0.860458	TWF2
rs6445385	52311443	0.0109318	0.860458	TWF2
rs140771279	52284040	0.00986064	0.860458	TWF2
rs149148515	52287672	0.00986064	0.860458	TWF2
rs61644644	52273480	0.00986064	0.860458	TWF2
rs4911180	35385145	0.0889515	0.865869	UQCC1
rs6060402	35417437	0.0569646	0.865869	UQCC1
rs6060401	35417411	0.054154	0.865869	UQCC1
rs6088815	35388671	0.0406714	0.865869	UQCC1
rs6088818	35397254	0.0406714	0.865869	UQCC1
rs6579234	35395682	0.0406714	0.865869	UQCC1
rs1570004	35370450	0.0302016	0.865869	UQCC1
rs745931	35368201	0.0302016	0.865869	UQCC1
rs6088816	35394632	0.0281491	0.865869	UQCC1
rs6087705	35413447	0.027065	0.865869	UQCC1
rs6088812	35386360	0.0252567	0.865869	UQCC1
rs6088813	35387378	0.0252567	0.865869	UQCC1
rs6141549	35386248	0.0252567	0.865869	UQCC1
rs1406947	35381727	0.0220668	0.865869	UQCC1
rs4911493	35372996	0.0209028	0.865869	UQCC1
rs1540928	35374042	0.018755	0.865869	UQCC1
rs4911178	35364817	0.018755	0.865869	UQCC1
rs4911179	35385096	0.018755	0.865869	UQCC1
rs4911491	35359482	0.018755	0.865869	UQCC1
rs4911492	35363996	0.018755	0.865869	UQCC1
rs4911494	35384111	0.018755	0.865869	UQCC1
rs6087698	35361116	0.018755	0.865869	UQCC1
rs6088809	35379720	0.018755	0.865869	UQCC1
rs6141546	35361479	0.018755	0.865869	UQCC1
rs6141548	35383282	0.018755	0.865869	UQCC1
rs6142358	35372505	0.018755	0.865869	UQCC1
rs6142359	35372647	0.018755	0.865869	UQCC1
rs6142363	35378457	0.018755	0.865869	UQCC1
rs6142370	35385575	0.018755	0.865869	UQCC1
rs224329	35431781	0.0139116	0.865869	UQCC1
rs1540927	35343541	0.0131867	0.865869	UQCC1
rs2425066	35339203	0.00945907	0.865869	UQCC1
rs7262358	35420334	0.00750676	0.865869	UQCC1
rs6087702	35408142	0.00734654	0.865869	UQCC1
rs6088820	35399495	0.00734654	0.865869	UQCC1
rs6142377	35407977	0.00734654	0.865869	UQCC1
rs6141551	35419167	0.0059571	0.865869	UQCC1
rs6142381	35420820	0.0059571	0.865869	UQCC1
rs2425065	35338465	0.00587402	0.865869	UQCC1
rs4353719	35389546	0.00551999	0.865869	UQCC1
rs6088817	35397173	0.00551999	0.865869	UQCC1
rs6141550	35389020	0.00551999	0.865869	UQCC1
rs6088801	35354458	0.00510309	0.865869	UQCC1
rs6088802	35354460	0.00510309	0.865869	UQCC1
rs1886691	35398468	0.00508461	0.865869	UQCC1
rs6088825	35408169	0.00508461	0.865869	UQCC1
rs6142376	35404958	0.00508461	0.865869	UQCC1
rs6088799	35346498	0.0049385	0.865869	UQCC1
rs6142349	35346043	0.0049385	0.865869	UQCC1
rs11348984	9688254	0.499584	0.98563	USP43
rs8066941	9685133	0.499584	0.98563	USP43
rs56362799	66457772	0.130851	0.869018	VXN
rs1108	66468628	0.0508444	0.869018	VXN
rs11343824	66467027	0.0508444	0.869018	VXN
rs13682	66468442	0.0508444	0.869018	VXN
rs2059640	66467515	0.0508444	0.869018	VXN
rs2059641	66467334	0.0508444	0.869018	VXN
rs2059642	66467105	0.0508444	0.869018	VXN
rs2357893	66466329	0.0508444	0.869018	VXN
rs2357894	66466150	0.0508444	0.869018	VXN
rs2465990	66469384	0.0508444	0.869018	VXN
rs2555569	66469224	0.0508444	0.869018	VXN
rs2555570	66468910	0.0508444	0.869018	VXN
rs2555572	66467775	0.0508444	0.869018	VXN
rs2555574	66466824	0.0508444	0.869018	VXN
rs2719004	66467907	0.0508444	0.869018	VXN
rs2719005	66468142	0.0508444	0.869018	VXN
rs4532579	66466338	0.0508444	0.869018	VXN
rs2719000	66466497	0.0203884	0.869018	VXN
rs66851469	82810597	0.339826	0.995004	WHAMM
rs8025432	82812827	0.339826	0.995004	WHAMM
rs12902970	82824773	0.105884	0.995004	WHAMM
rs2379996	82820021	0.105884	0.995004	WHAMM
rs2890314	82824032	0.105884	0.995004	WHAMM
rs113175928	70707607	0.0196005	0.892351	XKR9
rs11987511	70733636	0.0196005	0.892351	XKR9
rs11989553	70728664	0.0196005	0.892351	XKR9
rs11991273	70733625	0.0196005	0.892351	XKR9
rs12675271	70689774	0.0196005	0.892351	XKR9
rs13253842	70713268	0.0196005	0.892351	XKR9
rs13254908	70713863	0.0196005	0.892351	XKR9
rs13256250	70683958	0.0196005	0.892351	XKR9
rs13264669	70714537	0.0196005	0.892351	XKR9
rs13272523	70729237	0.0196005	0.892351	XKR9
rs1477944	70703365	0.0196005	0.892351	XKR9
rs17760497	70704810	0.0196005	0.892351	XKR9
rs34270993	70733033	0.0196005	0.892351	XKR9
rs34508469	70716228	0.0196005	0.892351	XKR9
rs34558600	70673917	0.0196005	0.892351	XKR9
rs34677078	70705480	0.0196005	0.892351	XKR9
rs34905858	70747215	0.0196005	0.892351	XKR9
rs35115527	70730774	0.0196005	0.892351	XKR9
rs35295900	70729826	0.0196005	0.892351	XKR9
rs35564237	70688239	0.0196005	0.892351	XKR9
rs35893260	70707838	0.0196005	0.892351	XKR9
rs35954749	70721543	0.0196005	0.892351	XKR9
rs36137830	70738899	0.0196005	0.892351	XKR9
rs3954897	70723720	0.0196005	0.892351	XKR9
rs56043721	70718192	0.0196005	0.892351	XKR9
rs56112621	70676159	0.0196005	0.892351	XKR9
rs56115633	70685276	0.0196005	0.892351	XKR9
rs57979737	70687088	0.0196005	0.892351	XKR9
rs58761932	70720116	0.0196005	0.892351	XKR9
rs62530772	70689306	0.0196005	0.892351	XKR9
rs62530785	70700069	0.0196005	0.892351	XKR9
rs62530792	70706532	0.0196005	0.892351	XKR9
rs62530826	70729408	0.0196005	0.892351	XKR9
rs6472538	70674736	0.0196005	0.892351	XKR9
rs6472539	70717575	0.0196005	0.892351	XKR9
rs67186982	70684573	0.0196005	0.892351	XKR9
rs6981435	70724913	0.0196005	0.892351	XKR9
rs6982406	70742373	0.0196005	0.892351	XKR9
rs6985299	70700844	0.0196005	0.892351	XKR9
rs6988596	70692682	0.0196005	0.892351	XKR9
rs6991329	70681190	0.0196005	0.892351	XKR9
rs6998024	70748605	0.0196005	0.892351	XKR9
rs7001162	70675235	0.0196005	0.892351	XKR9
rs7003123	70700854	0.0196005	0.892351	XKR9
rs7006615	70727572	0.0196005	0.892351	XKR9
rs7007450	70728034	0.0196005	0.892351	XKR9
rs7013657	70725324	0.0196005	0.892351	XKR9
rs7015035	70741366	0.0196005	0.892351	XKR9
rs7017914	70678968	0.0196005	0.892351	XKR9
rs10899051	74931506	0.498035	0.986351	XRRA1
rs10899052	74935168	0.498035	0.986351	XRRA1
rs13337715	85006653	0.150481	0.962952	ZDHHC7
rs74758820	85010176	0.150481	0.962952	ZDHHC7
rs9921436	85005342	0.108593	0.962952	ZDHHC7
rs116511042	84996665	0.069486	0.962952	ZDHHC7
rs13335877	84997080	0.0552152	0.962952	ZDHHC7
rs13335625	85000423	0.0465466	0.962952	ZDHHC7
rs28620863	84999348	0.0465466	0.962952	ZDHHC7
rs59113051	85000672	0.0465466	0.962952	ZDHHC7
rs7200672	84998219	0.0465466	0.962952	ZDHHC7
rs7201277	84998482	0.0465466	0.962952	ZDHHC7
rs80013304	85007940	0.0184675	0.962952	ZDHHC7
rs112410113	85008955	0.0179877	0.962952	ZDHHC7
rs112829882	85008904	0.0179877	0.962952	ZDHHC7
rs12597758	85007625	0.0179877	0.962952	ZDHHC7
rs59138540	85008208	0.0179877	0.962952	ZDHHC7
rs73258114	85008807	0.0179877	0.962952	ZDHHC7
rs73258117	85009110	0.0179877	0.962952	ZDHHC7
rs76742952	85008008	0.0179877	0.962952	ZDHHC7
rs78856588	85009182	0.0179877	0.962952	ZDHHC7
rs9926895	85007150	0.0179877	0.962952	ZDHHC7
rs9926901	85007127	0.0179877	0.962952	ZDHHC7
rs12702447	1166288	0.113428	0.911169	ZFAND2A
rs2949185	1169377	0.113428	0.911169	ZFAND2A
rs2949192	1164205	0.113428	0.911169	ZFAND2A
rs2949195	1163069	0.113428	0.911169	ZFAND2A
rs7805591	1171109	0.113428	0.911169	ZFAND2A
rs12702446	1166253	0.109608	0.911169	ZFAND2A
rs2140578	1174367	0.0908143	0.911169	ZFAND2A
rs2960837	1164321	0.0786256	0.911169	ZFAND2A
rs2949174	1174287	0.030451	0.911169	ZFAND2A
rs2949172	1174695	0.0288829	0.911169	ZFAND2A
rs6946684	1160154	0.020562	0.911169	ZFAND2A
rs6945392	1157029	0.0123623	0.911169	ZFAND2A
rs2949196	1162832	0.0122958	0.911169	ZFAND2A
rs1097312	80429221	0.169383	0.913306	ZFYVE16
rs1104243	80420144	0.0365163	0.913306	ZFYVE16
rs259024	80424967	0.0365163	0.913306	ZFYVE16
rs259026	80423395	0.0365163	0.913306	ZFYVE16
rs259027	80423350	0.0365163	0.913306	ZFYVE16
rs3096109	80416444	0.0365163	0.913306	ZFYVE16
rs74421477	80430522	0.0365163	0.913306	ZFYVE16
rs835726	80418355	0.0365163	0.913306	ZFYVE16
rs835729	80427583	0.0365163	0.913306	ZFYVE16
rs174076	80400531	0.0222772	0.913306	ZFYVE16
rs2547495	80397192	0.0222772	0.913306	ZFYVE16
rs58188811	80396190	0.0222772	0.913306	ZFYVE16
rs2544604	80447136	0.0208422	0.913306	ZFYVE16
rs10942926	80446188	0.0196291	0.913306	ZFYVE16
rs1669145	80469857	0.0196291	0.913306	ZFYVE16
rs173599	80464703	0.0196291	0.913306	ZFYVE16
rs2251759	80448002	0.0196291	0.913306	ZFYVE16
rs249016	80460308	0.0196291	0.913306	ZFYVE16
rs249030	80470473	0.0196291	0.913306	ZFYVE16
rs249032	80471126	0.0196291	0.913306	ZFYVE16
rs249038	80449650	0.0196291	0.913306	ZFYVE16
rs259028	80438478	0.0196291	0.913306	ZFYVE16
rs259030	80441445	0.0196291	0.913306	ZFYVE16
rs4704674	80435393	0.0196291	0.913306	ZFYVE16
rs6895032	80432473	0.0196291	0.913306	ZFYVE16
rs856765	80449087	0.0196291	0.913306	ZFYVE16
rs856772	80480853	0.0196291	0.913306	ZFYVE16
rs2544589	80407435	0.0102429	0.913306	ZFYVE16
rs259044	80403925	0.0102429	0.913306	ZFYVE16
rs259045	80404086	0.0102429	0.913306	ZFYVE16
rs259046	80404167	0.0102429	0.913306	ZFYVE16
rs259047	80404585	0.0102429	0.913306	ZFYVE16
rs1423113	80399010	0.00520473	0.913306	ZFYVE16
rs168940	80401224	0.00520473	0.913306	ZFYVE16
rs194541	80400486	0.00520473	0.913306	ZFYVE16
rs2544586	80394811	0.00520473	0.913306	ZFYVE16
rs2544587	80397010	0.00520473	0.913306	ZFYVE16
rs2544591	80408750	0.00520473	0.913306	ZFYVE16
rs2547481	80394634	0.00520473	0.913306	ZFYVE16
rs2547486	80395579	0.00520473	0.913306	ZFYVE16
rs2547496	80397759	0.00520473	0.913306	ZFYVE16
rs259036	80400502	0.00520473	0.913306	ZFYVE16
rs259037	80400784	0.00520473	0.913306	ZFYVE16
rs259038	80400882	0.00520473	0.913306	ZFYVE16
rs259040	80401682	0.00520473	0.913306	ZFYVE16
rs259042	80401932	0.00520473	0.913306	ZFYVE16
rs259051	80407724	0.00520473	0.913306	ZFYVE16
rs10418967	57632681	0.0988582	0.905757	ZNF211
rs56191433	57632898	0.0988582	0.905757	ZNF211
rs56340041	57632888	0.0988582	0.905757	ZNF211
rs73064506	57632432	0.0988582	0.905757	ZNF211
rs9749218	57631523	0.0988582	0.905757	ZNF211
rs9749254	57632095	0.0988582	0.905757	ZNF211
rs9749449	57633347	0.0988582	0.905757	ZNF211
rs10409334	57635181	0.0117345	0.905757	ZNF211
rs2360542	57635177	0.0117345	0.905757	ZNF211
rs10404811	57643439	0.00777864	0.905757	ZNF211
rs10409262	57643587	0.00777864	0.905757	ZNF211
rs10423688	57645722	0.00777864	0.905757	ZNF211
rs10425321	57645665	0.00777864	0.905757	ZNF211
rs112141426	57644859	0.00777864	0.905757	ZNF211
rs11879465	57641427	0.00777864	0.905757	ZNF211
rs11880050	57641449	0.00777864	0.905757	ZNF211
rs11880986	57643105	0.00777864	0.905757	ZNF211
rs12618	57642388	0.00777864	0.905757	ZNF211
rs144655550	57644703	0.00777864	0.905757	ZNF211
rs2360540	57640456	0.00777864	0.905757	ZNF211
rs3746209	57642937	0.00777864	0.905757	ZNF211
rs3746210	57642891	0.00777864	0.905757	ZNF211
rs3746216	57642209	0.00777864	0.905757	ZNF211
rs3746217	57641641	0.00777864	0.905757	ZNF211
rs3746218	57641632	0.00777864	0.905757	ZNF211
rs3746219	57640993	0.00777864	0.905757	ZNF211
rs3746220	57640665	0.00777864	0.905757	ZNF211
rs3746221	57640652	0.00777864	0.905757	ZNF211
rs59600515	57645122	0.00777864	0.905757	ZNF211
rs61417881	57645118	0.00777864	0.905757	ZNF211
rs73064531	57640591	0.00777864	0.905757	ZNF211
rs73064552	57643721	0.00777864	0.905757	ZNF211
rs73064555	57644102	0.00777864	0.905757	ZNF211
rs73939924	57640526	0.00777864	0.905757	ZNF211
rs73939927	57643154	0.00777864	0.905757	ZNF211
rs11084511	57636007	0.00533081	0.905757	ZNF211
rs11084513	57638076	0.00533081	0.905757	ZNF211
rs12609066	57638451	0.00533081	0.905757	ZNF211
rs12610072	57637487	0.00533081	0.905757	ZNF211
rs12610500	57638681	0.00533081	0.905757	ZNF211
rs2360541	57635324	0.00533081	0.905757	ZNF211
rs2885006	57635429	0.00533081	0.905757	ZNF211
rs1835986	9367192	0.154496	0.870319	ZNF266
rs113421203	9417109	0.0457977	0.870319	ZNF266
rs11880207	9421017	0.0457977	0.870319	ZNF266
rs1978437	9420666	0.0457977	0.870319	ZNF266
rs1978438	9420717	0.0457977	0.870319	ZNF266
rs1978711	9419405	0.0457977	0.870319	ZNF266
rs1978713	9419107	0.0457977	0.870319	ZNF266
rs2112528	9421407	0.0457977	0.870319	ZNF266
rs28711703	9420749	0.0457977	0.870319	ZNF266
rs58900528	9420865	0.0457977	0.870319	ZNF266
rs7249365	9415273	0.0457977	0.870319	ZNF266
rs7258023	9415237	0.0457977	0.870319	ZNF266
rs7258150	9415341	0.0457977	0.870319	ZNF266
rs10418233	9429946	0.0250919	0.870319	ZNF266
rs60618235	9430336	0.0250919	0.870319	ZNF266
rs7252370	9426515	0.0250919	0.870319	ZNF266
rs8102060	9428993	0.0250919	0.870319	ZNF266
rs8102069	9429015	0.0250919	0.870319	ZNF266
rs8107606	9428846	0.0250919	0.870319	ZNF266
rs9305082	9429848	0.0250919	0.870319	ZNF266
rs11878970	9406861	0.0188954	0.870319	ZNF266
rs10412150	9432148	0.0138562	0.870319	ZNF266
rs58394134	9422780	0.0117116	0.870319	ZNF266
rs6512121	9423129	0.0117116	0.870319	ZNF266
rs9783952	9422137	0.0117116	0.870319	ZNF266
rs8109962	9411712	0.00629769	0.870319	ZNF266
rs56290606	58407953	0.425673	0.90574	ZNF584
rs11666303	58411135	0.0494976	0.90574	ZNF584
rs11666716	58409585	0.0494976	0.90574	ZNF584
rs11878198	58408935	0.0494976	0.90574	ZNF584
rs12983843	58412251	0.0494976	0.90574	ZNF584
rs34511020	58409929	0.0494976	0.90574	ZNF584
rs73060293	58411683	0.0494976	0.90574	ZNF584
rs3826681	58407397	0.0419044	0.90574	ZNF584
rs3826683	58407366	0.0419044	0.90574	ZNF584
rs3826684	58407338	0.0419044	0.90574	ZNF584
rs56292587	58407699	0.0419044	0.90574	ZNF584
rs11878203	58408683	0.0225657	0.90574	ZNF584
rs12983679	58412369	0.0225657	0.90574	ZNF584
rs71333260	58410853	0.0225657	0.90574	ZNF584
rs35682929	173579	0.44767	0.985748	ZNF718
rs7678326	173022	0.44767	0.985748	ZNF718
rs7661699	152448	0.0612903	0.985748	ZNF718
rs10739692	127430486	0.0351748	0.951743	ZNF79
rs10987650	127434258	0.0351748	0.951743	ZNF79
rs13292096	127428907	0.0351748	0.951743	ZNF79
rs3923309	127434906	0.0351748	0.951743	ZNF79
rs4500179	127436063	0.0351748	0.951743	ZNF79
rs4504745	127435135	0.0351748	0.951743	ZNF79
rs4628351	127433954	0.0351748	0.951743	ZNF79
rs4641163	127432257	0.0351748	0.951743	ZNF79
rs6478773	127432208	0.0351748	0.951743	ZNF79
rs6478777	127437091	0.0351748	0.951743	ZNF79
rs6478780	127438154	0.0351748	0.951743	ZNF79
rs6478781	127438171	0.0351748	0.951743	ZNF79
rs6478784	127441561	0.0351748	0.951743	ZNF79
rs7033779	127428531	0.0351748	0.951743	ZNF79
rs7046875	127440628	0.0351748	0.951743	ZNF79
rs7851991	127438986	0.0351748	0.951743	ZNF79
rs7853047	127435821	0.0351748	0.951743	ZNF79
rs7859457	127440317	0.0351748	0.951743	ZNF79
rs7869023	127439399	0.0351748	0.951743	ZNF79
rs7869101	127439246	0.0351748	0.951743	ZNF79
rs7869823	127439810	0.0351748	0.951743	ZNF79
rs7870737	127434528	0.0351748	0.951743	ZNF79
rs2243903	127457464	0.0210043	0.951743	ZNF79
rs2243906	127457390	0.0210043	0.951743	ZNF79
rs2244468	127453000	0.0210043	0.951743	ZNF79
rs2244624	127451229	0.0210043	0.951743	ZNF79
rs2247303	127451019	0.0210043	0.951743	ZNF79
rs2247322	127450597	0.0210043	0.951743	ZNF79
rs2247781	127446645	0.0210043	0.951743	ZNF79
rs2247905	127446097	0.0210043	0.951743	ZNF79
rs34968274	127453432	0.0210043	0.951743	ZNF79
rs1045599	15976596	0.999891	0.992961	ZSWIM7
